# Supplementary material for: Gestational Interrelationships among Gut-Metabolism-Transcriptome in Regulating Early Embryo Implantation and Placental Development in Mice
Source: Preprints.org preprint supplement (doi:10.20944/preprints202408.1652.v1), 2024-08-22
Supplement: Supplementary file 1 [file supplementary]

## Sheet: Sheet1
Category	GO.ID	Term	Up	Down	DEG	Total	Pvalue	FDR	Up_Gene	Down_Gene
MF	GO:0005515	protein binding	1260	1568	2828	10035	< 1e-30	3.02611e-28	ENSMUSG00000000001(Gnai3),ENSMUSG00000000088(Cox5a),ENSMUSG00000000216(Scnn1g),ENSMUSG00000000305(Cdh4),ENSMUSG00000000325(Arvcf),ENSMUSG00000000555(Itga5),ENSMUSG00000000560(Gabra2),ENSMUSG00000000628(Hk2),ENSMUSG00000000706(Btn1a1),ENSMUSG00000000708(Kat2b),ENSMUSG00000000791(Il12rb1),ENSMUSG00000000805(Car4),ENSMUSG00000000817(Fasl),ENSMUSG00000001020(S100a4),ENSMUSG00000001023(S100a5),ENSMUSG…	ENSMUSG00000000085(Scmh1),ENSMUSG00000000120(Ngfr),ENSMUSG00000000126(Wnt9a),ENSMUSG00000000142(Axin2),ENSMUSG00000000154(Slc22a18),ENSMUSG00000000157(Itgb2l),ENSMUSG00000000184(Ccnd2),ENSMUSG00000000202(Btbd17),ENSMUSG00000000303(Cdh1),ENSMUSG00000000308(Ckmt1),ENSMUSG00000000320(Alox12),ENSMUSG00000000385(Tmprss2),ENSMUSG00000000392(Fap),ENSMUSG00000000402(Egfl6),ENSMUSG00000000416(Cttnbp2),ENS…
MF	GO:0005488	binding	1685	2107	3792	14611	< 1e-30	3.02611e-28	ENSMUSG00000000001(Gnai3),ENSMUSG00000000028(Cdc45),ENSMUSG00000000088(Cox5a),ENSMUSG00000000216(Scnn1g),ENSMUSG00000000305(Cdh4),ENSMUSG00000000325(Arvcf),ENSMUSG00000000420(Galnt1),ENSMUSG00000000555(Itga5),ENSMUSG00000000560(Gabra2),ENSMUSG00000000628(Hk2),ENSMUSG00000000706(Btn1a1),ENSMUSG00000000708(Kat2b),ENSMUSG00000000791(Il12rb1),ENSMUSG00000000805(Car4),ENSMUSG00000000817(Fasl),ENSMUSG0…	ENSMUSG00000000085(Scmh1),ENSMUSG00000000120(Ngfr),ENSMUSG00000000126(Wnt9a),ENSMUSG00000000142(Axin2),ENSMUSG00000000154(Slc22a18),ENSMUSG00000000157(Itgb2l),ENSMUSG00000000184(Ccnd2),ENSMUSG00000000202(Btbd17),ENSMUSG00000000253(Gmpr),ENSMUSG00000000303(Cdh1),ENSMUSG00000000308(Ckmt1),ENSMUSG00000000320(Alox12),ENSMUSG00000000385(Tmprss2),ENSMUSG00000000392(Fap),ENSMUSG00000000402(Egfl6),ENSMUS…
MF	GO:0005102	receptor binding	288	290	578	1602	< 1e-30	3.02611e-28	ENSMUSG00000000001(Gnai3),ENSMUSG00000000555(Itga5),ENSMUSG00000000706(Btn1a1),ENSMUSG00000000791(Il12rb1),ENSMUSG00000000817(Fasl),ENSMUSG00000001020(S100a4),ENSMUSG00000001029(Icam2),ENSMUSG00000001098(Kctd10),ENSMUSG00000001131(Timp1),ENSMUSG00000001227(Sema6b),ENSMUSG00000001260(Gabrg1),ENSMUSG00000001507(Itga3),ENSMUSG00000002015(Bcap31),ENSMUSG00000002603(Tgfb1),ENSMUSG00000002944(Cd36),ENS…	ENSMUSG00000000120(Ngfr),ENSMUSG00000000126(Wnt9a),ENSMUSG00000000157(Itgb2l),ENSMUSG00000000392(Fap),ENSMUSG00000000402(Egfl6),ENSMUSG00000000627(Sema4f),ENSMUSG00000000732(Icosl),ENSMUSG00000000869(Il4),ENSMUSG00000000881(Dlg3),ENSMUSG00000000957(Mmp14),ENSMUSG00000001334(Fndc5),ENSMUSG00000001583(Tnk1),ENSMUSG00000001741(Il16),ENSMUSG00000002104(Rapsn),ENSMUSG00000002384(Bmp8b),ENSMUSG00000002…
BP	GO:0048731	system development	751	876	1627	4670	< 1e-30	3.02611e-28	ENSMUSG00000000001(Gnai3),ENSMUSG00000000305(Cdh4),ENSMUSG00000000555(Itga5),ENSMUSG00000000560(Gabra2),ENSMUSG00000000628(Hk2),ENSMUSG00000000708(Kat2b),ENSMUSG00000000817(Fasl),ENSMUSG00000001098(Kctd10),ENSMUSG00000001131(Timp1),ENSMUSG00000001227(Sema6b),ENSMUSG00000001504(Irx2),ENSMUSG00000001507(Itga3),ENSMUSG00000001510(Dlx3),ENSMUSG00000001627(Ifrd1),ENSMUSG00000001642(Akr1b3),ENSMUSG0000…	ENSMUSG00000000120(Ngfr),ENSMUSG00000000126(Wnt9a),ENSMUSG00000000142(Axin2),ENSMUSG00000000303(Cdh1),ENSMUSG00000000320(Alox12),ENSMUSG00000000392(Fap),ENSMUSG00000000416(Cttnbp2),ENSMUSG00000000567(Sox9),ENSMUSG00000000627(Sema4f),ENSMUSG00000000690(Hoxb6),ENSMUSG00000000730(Dnmt3l),ENSMUSG00000000731(Aire),ENSMUSG00000000732(Icosl),ENSMUSG00000000753(Serpinf1),ENSMUSG00000000782(Tcf7),ENSMUSG0…
BP	GO:0007275	multicellular organism development	806	956	1762	5220	< 1e-30	3.02611e-28	ENSMUSG00000000001(Gnai3),ENSMUSG00000000305(Cdh4),ENSMUSG00000000325(Arvcf),ENSMUSG00000000555(Itga5),ENSMUSG00000000560(Gabra2),ENSMUSG00000000628(Hk2),ENSMUSG00000000708(Kat2b),ENSMUSG00000000817(Fasl),ENSMUSG00000001098(Kctd10),ENSMUSG00000001131(Timp1),ENSMUSG00000001227(Sema6b),ENSMUSG00000001504(Irx2),ENSMUSG00000001507(Itga3),ENSMUSG00000001510(Dlx3),ENSMUSG00000001627(Ifrd1),ENSMUSG00000…	ENSMUSG00000000085(Scmh1),ENSMUSG00000000120(Ngfr),ENSMUSG00000000126(Wnt9a),ENSMUSG00000000142(Axin2),ENSMUSG00000000303(Cdh1),ENSMUSG00000000320(Alox12),ENSMUSG00000000392(Fap),ENSMUSG00000000402(Egfl6),ENSMUSG00000000416(Cttnbp2),ENSMUSG00000000567(Sox9),ENSMUSG00000000627(Sema4f),ENSMUSG00000000690(Hoxb6),ENSMUSG00000000730(Dnmt3l),ENSMUSG00000000731(Aire),ENSMUSG00000000732(Icosl),ENSMUSG000…
BP	GO:0048856	anatomical structure development	865	1027	1892	5786	< 1e-30	3.02611e-28	ENSMUSG00000000001(Gnai3),ENSMUSG00000000216(Scnn1g),ENSMUSG00000000305(Cdh4),ENSMUSG00000000325(Arvcf),ENSMUSG00000000555(Itga5),ENSMUSG00000000560(Gabra2),ENSMUSG00000000628(Hk2),ENSMUSG00000000708(Kat2b),ENSMUSG00000000817(Fasl),ENSMUSG00000001098(Kctd10),ENSMUSG00000001131(Timp1),ENSMUSG00000001227(Sema6b),ENSMUSG00000001504(Irx2),ENSMUSG00000001507(Itga3),ENSMUSG00000001510(Dlx3),ENSMUSG0000…	ENSMUSG00000000085(Scmh1),ENSMUSG00000000120(Ngfr),ENSMUSG00000000126(Wnt9a),ENSMUSG00000000142(Axin2),ENSMUSG00000000303(Cdh1),ENSMUSG00000000320(Alox12),ENSMUSG00000000392(Fap),ENSMUSG00000000402(Egfl6),ENSMUSG00000000416(Cttnbp2),ENSMUSG00000000567(Sox9),ENSMUSG00000000627(Sema4f),ENSMUSG00000000690(Hoxb6),ENSMUSG00000000730(Dnmt3l),ENSMUSG00000000731(Aire),ENSMUSG00000000732(Icosl),ENSMUSG000…
BP	GO:0032502	developmental process	913	1075	1988	6245	< 1e-30	3.02611e-28	ENSMUSG00000000001(Gnai3),ENSMUSG00000000216(Scnn1g),ENSMUSG00000000305(Cdh4),ENSMUSG00000000325(Arvcf),ENSMUSG00000000555(Itga5),ENSMUSG00000000560(Gabra2),ENSMUSG00000000628(Hk2),ENSMUSG00000000708(Kat2b),ENSMUSG00000000817(Fasl),ENSMUSG00000001098(Kctd10),ENSMUSG00000001131(Timp1),ENSMUSG00000001227(Sema6b),ENSMUSG00000001504(Irx2),ENSMUSG00000001507(Itga3),ENSMUSG00000001510(Dlx3),ENSMUSG0000…	ENSMUSG00000000085(Scmh1),ENSMUSG00000000120(Ngfr),ENSMUSG00000000126(Wnt9a),ENSMUSG00000000142(Axin2),ENSMUSG00000000303(Cdh1),ENSMUSG00000000320(Alox12),ENSMUSG00000000392(Fap),ENSMUSG00000000402(Egfl6),ENSMUSG00000000416(Cttnbp2),ENSMUSG00000000567(Sox9),ENSMUSG00000000627(Sema4f),ENSMUSG00000000690(Hoxb6),ENSMUSG00000000730(Dnmt3l),ENSMUSG00000000731(Aire),ENSMUSG00000000732(Icosl),ENSMUSG000…
BP	GO:0051239	regulation of multicellular organismal process	520	601	1121	3065	< 1e-30	3.02611e-28	ENSMUSG00000000305(Cdh4),ENSMUSG00000000555(Itga5),ENSMUSG00000000628(Hk2),ENSMUSG00000000706(Btn1a1),ENSMUSG00000000708(Kat2b),ENSMUSG00000000791(Il12rb1),ENSMUSG00000000817(Fasl),ENSMUSG00000001131(Timp1),ENSMUSG00000001227(Sema6b),ENSMUSG00000001467(Cyp51),ENSMUSG00000001507(Itga3),ENSMUSG00000001627(Ifrd1),ENSMUSG00000002250(Ppard),ENSMUSG00000002565(Scin),ENSMUSG00000002603(Tgfb1),ENSMUSG000…	ENSMUSG00000000120(Ngfr),ENSMUSG00000000126(Wnt9a),ENSMUSG00000000142(Axin2),ENSMUSG00000000320(Alox12),ENSMUSG00000000392(Fap),ENSMUSG00000000567(Sox9),ENSMUSG00000000627(Sema4f),ENSMUSG00000000732(Icosl),ENSMUSG00000000753(Serpinf1),ENSMUSG00000000782(Tcf7),ENSMUSG00000000861(Bcl11a),ENSMUSG00000000869(Il4),ENSMUSG00000000889(Dbh),ENSMUSG00000000957(Mmp14),ENSMUSG00000001249(Hpn),ENSMUSG0000000…
BP	GO:0048513	animal organ development	582	614	1196	3470	< 1e-30	3.02611e-28	ENSMUSG00000000001(Gnai3),ENSMUSG00000000628(Hk2),ENSMUSG00000000708(Kat2b),ENSMUSG00000000817(Fasl),ENSMUSG00000001098(Kctd10),ENSMUSG00000001131(Timp1),ENSMUSG00000001227(Sema6b),ENSMUSG00000001504(Irx2),ENSMUSG00000001507(Itga3),ENSMUSG00000001510(Dlx3),ENSMUSG00000001642(Akr1b3),ENSMUSG00000001751(Naglu),ENSMUSG00000002250(Ppard),ENSMUSG00000002565(Scin),ENSMUSG00000002603(Tgfb1),ENSMUSG00000…	ENSMUSG00000000120(Ngfr),ENSMUSG00000000126(Wnt9a),ENSMUSG00000000142(Axin2),ENSMUSG00000000303(Cdh1),ENSMUSG00000000320(Alox12),ENSMUSG00000000416(Cttnbp2),ENSMUSG00000000567(Sox9),ENSMUSG00000000627(Sema4f),ENSMUSG00000000690(Hoxb6),ENSMUSG00000000730(Dnmt3l),ENSMUSG00000000731(Aire),ENSMUSG00000000753(Serpinf1),ENSMUSG00000000782(Tcf7),ENSMUSG00000000861(Bcl11a),ENSMUSG00000000869(Il4),ENSMUSG…
BP	GO:0051179	localization	877	960	1837	5900	< 1e-30	3.02611e-28	ENSMUSG00000000001(Gnai3),ENSMUSG00000000088(Cox5a),ENSMUSG00000000216(Scnn1g),ENSMUSG00000000555(Itga5),ENSMUSG00000000560(Gabra2),ENSMUSG00000000594(Gm2a),ENSMUSG00000000628(Hk2),ENSMUSG00000000706(Btn1a1),ENSMUSG00000000792(Slc5a5),ENSMUSG00000000805(Car4),ENSMUSG00000000817(Fasl),ENSMUSG00000001025(S100a6),ENSMUSG00000001095(Slc13a2),ENSMUSG00000001131(Timp1),ENSMUSG00000001227(Sema6b),ENSMUS…	ENSMUSG00000000120(Ngfr),ENSMUSG00000000142(Axin2),ENSMUSG00000000154(Slc22a18),ENSMUSG00000000157(Itgb2l),ENSMUSG00000000303(Cdh1),ENSMUSG00000000320(Alox12),ENSMUSG00000000385(Tmprss2),ENSMUSG00000000392(Fap),ENSMUSG00000000567(Sox9),ENSMUSG00000000627(Sema4f),ENSMUSG00000000731(Aire),ENSMUSG00000000753(Serpinf1),ENSMUSG00000000794(Kcnn3),ENSMUSG00000000869(Il4),ENSMUSG00000000881(Dlg3),ENSMUSG…
BP	GO:0009653	anatomical structure morphogenesis	431	514	945	2632	< 1e-30	3.02611e-28	ENSMUSG00000000216(Scnn1g),ENSMUSG00000000305(Cdh4),ENSMUSG00000000555(Itga5),ENSMUSG00000000628(Hk2),ENSMUSG00000000817(Fasl),ENSMUSG00000001098(Kctd10),ENSMUSG00000001227(Sema6b),ENSMUSG00000001504(Irx2),ENSMUSG00000001507(Itga3),ENSMUSG00000001510(Dlx3),ENSMUSG00000001627(Ifrd1),ENSMUSG00000001751(Naglu),ENSMUSG00000002233(Rhoc),ENSMUSG00000002603(Tgfb1),ENSMUSG00000002944(Cd36),ENSMUSG0000000…	ENSMUSG00000000120(Ngfr),ENSMUSG00000000126(Wnt9a),ENSMUSG00000000142(Axin2),ENSMUSG00000000320(Alox12),ENSMUSG00000000392(Fap),ENSMUSG00000000567(Sox9),ENSMUSG00000000627(Sema4f),ENSMUSG00000000690(Hoxb6),ENSMUSG00000000731(Aire),ENSMUSG00000000753(Serpinf1),ENSMUSG00000000782(Tcf7),ENSMUSG00000000861(Bcl11a),ENSMUSG00000000869(Il4),ENSMUSG00000000881(Dlg3),ENSMUSG00000000957(Mmp14),ENSMUSG00000…
BP	GO:2000026	regulation of multicellular organismal development	359	428	787	2098	< 1e-30	3.02611e-28	ENSMUSG00000000305(Cdh4),ENSMUSG00000000555(Itga5),ENSMUSG00000000628(Hk2),ENSMUSG00000000708(Kat2b),ENSMUSG00000000817(Fasl),ENSMUSG00000001131(Timp1),ENSMUSG00000001227(Sema6b),ENSMUSG00000001507(Itga3),ENSMUSG00000001627(Ifrd1),ENSMUSG00000002250(Ppard),ENSMUSG00000002565(Scin),ENSMUSG00000002603(Tgfb1),ENSMUSG00000002944(Cd36),ENSMUSG00000002957(Ap2a2),ENSMUSG00000003032(Klf4),ENSMUSG00000003…	ENSMUSG00000000120(Ngfr),ENSMUSG00000000126(Wnt9a),ENSMUSG00000000142(Axin2),ENSMUSG00000000320(Alox12),ENSMUSG00000000567(Sox9),ENSMUSG00000000627(Sema4f),ENSMUSG00000000753(Serpinf1),ENSMUSG00000000782(Tcf7),ENSMUSG00000000861(Bcl11a),ENSMUSG00000000869(Il4),ENSMUSG00000000957(Mmp14),ENSMUSG00000001249(Hpn),ENSMUSG00000001656(Hoxc11),ENSMUSG00000002985(Apoe),ENSMUSG00000003282(Plag1),ENSMUSG000…
BP	GO:0032879	regulation of localization	473	524	997	2849	< 1e-30	3.02611e-28	ENSMUSG00000000555(Itga5),ENSMUSG00000000628(Hk2),ENSMUSG00000000706(Btn1a1),ENSMUSG00000000817(Fasl),ENSMUSG00000001131(Timp1),ENSMUSG00000001227(Sema6b),ENSMUSG00000001467(Cyp51),ENSMUSG00000001507(Itga3),ENSMUSG00000002015(Bcap31),ENSMUSG00000002233(Rhoc),ENSMUSG00000002250(Ppard),ENSMUSG00000002603(Tgfb1),ENSMUSG00000002944(Cd36),ENSMUSG00000003032(Klf4),ENSMUSG00000003200(Sh3gl1),ENSMUSG0000…	ENSMUSG00000000120(Ngfr),ENSMUSG00000000303(Cdh1),ENSMUSG00000000320(Alox12),ENSMUSG00000000567(Sox9),ENSMUSG00000000627(Sema4f),ENSMUSG00000000731(Aire),ENSMUSG00000000753(Serpinf1),ENSMUSG00000000869(Il4),ENSMUSG00000000903(Vpreb3),ENSMUSG00000000957(Mmp14),ENSMUSG00000001435(Col18a1),ENSMUSG00000001672(Marveld3),ENSMUSG00000001741(Il16),ENSMUSG00000002985(Apoe),ENSMUSG00000003352(Cacnb3),ENSMU…
BP	GO:0030154	cell differentiation	593	764	1357	4182	< 1e-30	3.02611e-28	ENSMUSG00000000305(Cdh4),ENSMUSG00000000555(Itga5),ENSMUSG00000000708(Kat2b),ENSMUSG00000000817(Fasl),ENSMUSG00000001227(Sema6b),ENSMUSG00000001507(Itga3),ENSMUSG00000001510(Dlx3),ENSMUSG00000001627(Ifrd1),ENSMUSG00000001642(Akr1b3),ENSMUSG00000001751(Naglu),ENSMUSG00000002250(Ppard),ENSMUSG00000002565(Scin),ENSMUSG00000002603(Tgfb1),ENSMUSG00000002944(Cd36),ENSMUSG00000002957(Ap2a2),ENSMUSG00000…	ENSMUSG00000000120(Ngfr),ENSMUSG00000000126(Wnt9a),ENSMUSG00000000142(Axin2),ENSMUSG00000000303(Cdh1),ENSMUSG00000000402(Egfl6),ENSMUSG00000000567(Sox9),ENSMUSG00000000627(Sema4f),ENSMUSG00000000730(Dnmt3l),ENSMUSG00000000731(Aire),ENSMUSG00000000753(Serpinf1),ENSMUSG00000000782(Tcf7),ENSMUSG00000000861(Bcl11a),ENSMUSG00000000869(Il4),ENSMUSG00000000901(Mmp11),ENSMUSG00000000957(Mmp14),ENSMUSG000…
BP	GO:0007155	cell adhesion	236	308	544	1322	< 1e-30	3.02611e-28	ENSMUSG00000000305(Cdh4),ENSMUSG00000000325(Arvcf),ENSMUSG00000000555(Itga5),ENSMUSG00000000706(Btn1a1),ENSMUSG00000000791(Il12rb1),ENSMUSG00000001029(Icam2),ENSMUSG00000001507(Itga3),ENSMUSG00000002250(Ppard),ENSMUSG00000002603(Tgfb1),ENSMUSG00000002808(Epdr1),ENSMUSG00000002944(Cd36),ENSMUSG00000002980(Bcam),ENSMUSG00000003032(Klf4),ENSMUSG00000003814(Calr),ENSMUSG00000004709(Cd244a),ENSMUSG000…	ENSMUSG00000000157(Itgb2l),ENSMUSG00000000303(Cdh1),ENSMUSG00000000320(Alox12),ENSMUSG00000000392(Fap),ENSMUSG00000000402(Egfl6),ENSMUSG00000000567(Sox9),ENSMUSG00000000732(Icosl),ENSMUSG00000000782(Tcf7),ENSMUSG00000000869(Il4),ENSMUSG00000000881(Dlg3),ENSMUSG00000000957(Mmp14),ENSMUSG00000001119(Col6a1),ENSMUSG00000001435(Col18a1),ENSMUSG00000002341(Ncan),ENSMUSG00000003882(Il7r),ENSMUSG0000000…
BP	GO:0022610	biological adhesion	237	310	547	1333	< 1e-30	3.02611e-28	ENSMUSG00000000305(Cdh4),ENSMUSG00000000325(Arvcf),ENSMUSG00000000555(Itga5),ENSMUSG00000000706(Btn1a1),ENSMUSG00000000791(Il12rb1),ENSMUSG00000001029(Icam2),ENSMUSG00000001507(Itga3),ENSMUSG00000002250(Ppard),ENSMUSG00000002603(Tgfb1),ENSMUSG00000002808(Epdr1),ENSMUSG00000002944(Cd36),ENSMUSG00000002980(Bcam),ENSMUSG00000003032(Klf4),ENSMUSG00000003814(Calr),ENSMUSG00000004709(Cd244a),ENSMUSG000…	ENSMUSG00000000157(Itgb2l),ENSMUSG00000000303(Cdh1),ENSMUSG00000000320(Alox12),ENSMUSG00000000392(Fap),ENSMUSG00000000402(Egfl6),ENSMUSG00000000567(Sox9),ENSMUSG00000000732(Icosl),ENSMUSG00000000782(Tcf7),ENSMUSG00000000869(Il4),ENSMUSG00000000881(Dlg3),ENSMUSG00000000957(Mmp14),ENSMUSG00000001119(Col6a1),ENSMUSG00000001435(Col18a1),ENSMUSG00000002341(Ncan),ENSMUSG00000003882(Il7r),ENSMUSG0000000…
BP	GO:0051094	positive regulation of developmental process	268	324	592	1486	< 1e-30	3.02611e-28	ENSMUSG00000000305(Cdh4),ENSMUSG00000000555(Itga5),ENSMUSG00000000628(Hk2),ENSMUSG00000000708(Kat2b),ENSMUSG00000001507(Itga3),ENSMUSG00000002250(Ppard),ENSMUSG00000002565(Scin),ENSMUSG00000002603(Tgfb1),ENSMUSG00000002944(Cd36),ENSMUSG00000003032(Klf4),ENSMUSG00000003271(Sult2b1),ENSMUSG00000003814(Calr),ENSMUSG00000004031(Brinp2),ENSMUSG00000004791(Pgf),ENSMUSG00000004885(Crabp2),ENSMUSG0000000…	ENSMUSG00000000120(Ngfr),ENSMUSG00000000126(Wnt9a),ENSMUSG00000000142(Axin2),ENSMUSG00000000320(Alox12),ENSMUSG00000000567(Sox9),ENSMUSG00000000753(Serpinf1),ENSMUSG00000000861(Bcl11a),ENSMUSG00000000869(Il4),ENSMUSG00000000957(Mmp14),ENSMUSG00000001249(Hpn),ENSMUSG00000001334(Fndc5),ENSMUSG00000001420(Tmem79),ENSMUSG00000001656(Hoxc11),ENSMUSG00000001802(Lrp3),ENSMUSG00000002985(Apoe),ENSMUSG000…
BP	GO:0050793	regulation of developmental process	436	506	942	2693	< 1e-30	3.02611e-28	ENSMUSG00000000305(Cdh4),ENSMUSG00000000555(Itga5),ENSMUSG00000000628(Hk2),ENSMUSG00000000708(Kat2b),ENSMUSG00000000817(Fasl),ENSMUSG00000001131(Timp1),ENSMUSG00000001227(Sema6b),ENSMUSG00000001507(Itga3),ENSMUSG00000001517(Foxm1),ENSMUSG00000001627(Ifrd1),ENSMUSG00000002233(Rhoc),ENSMUSG00000002250(Ppard),ENSMUSG00000002565(Scin),ENSMUSG00000002603(Tgfb1),ENSMUSG00000002944(Cd36),ENSMUSG00000002…	ENSMUSG00000000120(Ngfr),ENSMUSG00000000126(Wnt9a),ENSMUSG00000000142(Axin2),ENSMUSG00000000320(Alox12),ENSMUSG00000000567(Sox9),ENSMUSG00000000627(Sema4f),ENSMUSG00000000753(Serpinf1),ENSMUSG00000000782(Tcf7),ENSMUSG00000000861(Bcl11a),ENSMUSG00000000869(Il4),ENSMUSG00000000901(Mmp11),ENSMUSG00000000957(Mmp14),ENSMUSG00000001249(Hpn),ENSMUSG00000001334(Fndc5),ENSMUSG00000001420(Tmem79),ENSMUSG00…
BP	GO:0009888	tissue development	323	388	711	1892	< 1e-30	3.02611e-28	ENSMUSG00000000216(Scnn1g),ENSMUSG00000000555(Itga5),ENSMUSG00000001131(Timp1),ENSMUSG00000001227(Sema6b),ENSMUSG00000001504(Irx2),ENSMUSG00000001507(Itga3),ENSMUSG00000001510(Dlx3),ENSMUSG00000001627(Ifrd1),ENSMUSG00000001642(Akr1b3),ENSMUSG00000002233(Rhoc),ENSMUSG00000002250(Ppard),ENSMUSG00000002565(Scin),ENSMUSG00000002603(Tgfb1),ENSMUSG00000003032(Klf4),ENSMUSG00000003271(Sult2b1),ENSMUSG00…	ENSMUSG00000000120(Ngfr),ENSMUSG00000000126(Wnt9a),ENSMUSG00000000142(Axin2),ENSMUSG00000000320(Alox12),ENSMUSG00000000567(Sox9),ENSMUSG00000000627(Sema4f),ENSMUSG00000000731(Aire),ENSMUSG00000000782(Tcf7),ENSMUSG00000000881(Dlg3),ENSMUSG00000000957(Mmp14),ENSMUSG00000001119(Col6a1),ENSMUSG00000001249(Hpn),ENSMUSG00000001420(Tmem79),ENSMUSG00000001435(Col18a1),ENSMUSG00000001508(Sgca),ENSMUSG0000…
BP	GO:0007399	nervous system development	330	508	838	2338	< 1e-30	3.02611e-28	ENSMUSG00000000001(Gnai3),ENSMUSG00000000305(Cdh4),ENSMUSG00000000560(Gabra2),ENSMUSG00000000708(Kat2b),ENSMUSG00000001227(Sema6b),ENSMUSG00000001507(Itga3),ENSMUSG00000001627(Ifrd1),ENSMUSG00000001751(Naglu),ENSMUSG00000002250(Ppard),ENSMUSG00000002603(Tgfb1),ENSMUSG00000003032(Klf4),ENSMUSG00000003814(Calr),ENSMUSG00000004031(Brinp2),ENSMUSG00000004151(Etv1),ENSMUSG00000004207(Psap),ENSMUSG0000…	ENSMUSG00000000120(Ngfr),ENSMUSG00000000126(Wnt9a),ENSMUSG00000000303(Cdh1),ENSMUSG00000000416(Cttnbp2),ENSMUSG00000000567(Sox9),ENSMUSG00000000627(Sema4f),ENSMUSG00000000753(Serpinf1),ENSMUSG00000000782(Tcf7),ENSMUSG00000000861(Bcl11a),ENSMUSG00000000957(Mmp14),ENSMUSG00000001270(Ckb),ENSMUSG00000001657(Hoxc8),ENSMUSG00000001911(Nfix),ENSMUSG00000002985(Apoe),ENSMUSG00000003282(Plag1),ENSMUSG000…
BP	GO:0051240	positive regulation of multicellular organismal process	326	354	680	1796	< 1e-30	3.02611e-28	ENSMUSG00000000305(Cdh4),ENSMUSG00000000555(Itga5),ENSMUSG00000000628(Hk2),ENSMUSG00000000708(Kat2b),ENSMUSG00000000791(Il12rb1),ENSMUSG00000001507(Itga3),ENSMUSG00000002565(Scin),ENSMUSG00000002603(Tgfb1),ENSMUSG00000002944(Cd36),ENSMUSG00000003032(Klf4),ENSMUSG00000003814(Calr),ENSMUSG00000004031(Brinp2),ENSMUSG00000004709(Cd244a),ENSMUSG00000004791(Pgf),ENSMUSG00000004885(Crabp2),ENSMUSG000000…	ENSMUSG00000000120(Ngfr),ENSMUSG00000000142(Axin2),ENSMUSG00000000320(Alox12),ENSMUSG00000000567(Sox9),ENSMUSG00000000732(Icosl),ENSMUSG00000000753(Serpinf1),ENSMUSG00000000861(Bcl11a),ENSMUSG00000000869(Il4),ENSMUSG00000000889(Dbh),ENSMUSG00000000957(Mmp14),ENSMUSG00000001249(Hpn),ENSMUSG00000001656(Hoxc11),ENSMUSG00000001741(Il16),ENSMUSG00000001802(Lrp3),ENSMUSG00000001870(Ltbp1),ENSMUSG000000…
BP	GO:0065008	regulation of biological quality	572	645	1217	3712	< 1e-30	3.02611e-28	ENSMUSG00000000216(Scnn1g),ENSMUSG00000000305(Cdh4),ENSMUSG00000000560(Gabra2),ENSMUSG00000000594(Gm2a),ENSMUSG00000000628(Hk2),ENSMUSG00000000708(Kat2b),ENSMUSG00000000792(Slc5a5),ENSMUSG00000000805(Car4),ENSMUSG00000000817(Fasl),ENSMUSG00000001227(Sema6b),ENSMUSG00000001260(Gabrg1),ENSMUSG00000001403(Ube2c),ENSMUSG00000001627(Ifrd1),ENSMUSG00000001642(Akr1b3),ENSMUSG00000002015(Bcap31),ENSMUSG0…	ENSMUSG00000000120(Ngfr),ENSMUSG00000000142(Axin2),ENSMUSG00000000320(Alox12),ENSMUSG00000000416(Cttnbp2),ENSMUSG00000000567(Sox9),ENSMUSG00000000627(Sema4f),ENSMUSG00000000690(Hoxb6),ENSMUSG00000000753(Serpinf1),ENSMUSG00000000861(Bcl11a),ENSMUSG00000000881(Dlg3),ENSMUSG00000000889(Dbh),ENSMUSG00000001247(Lsr),ENSMUSG00000001249(Hpn),ENSMUSG00000001270(Ckb),ENSMUSG00000001420(Tmem79),ENSMUSG0000…
BP	GO:0048869	cellular developmental process	611	781	1392	4375	< 1e-30	3.02611e-28	ENSMUSG00000000305(Cdh4),ENSMUSG00000000555(Itga5),ENSMUSG00000000708(Kat2b),ENSMUSG00000000817(Fasl),ENSMUSG00000001227(Sema6b),ENSMUSG00000001507(Itga3),ENSMUSG00000001510(Dlx3),ENSMUSG00000001517(Foxm1),ENSMUSG00000001627(Ifrd1),ENSMUSG00000001642(Akr1b3),ENSMUSG00000001751(Naglu),ENSMUSG00000002233(Rhoc),ENSMUSG00000002250(Ppard),ENSMUSG00000002565(Scin),ENSMUSG00000002603(Tgfb1),ENSMUSG00000…	ENSMUSG00000000120(Ngfr),ENSMUSG00000000126(Wnt9a),ENSMUSG00000000142(Axin2),ENSMUSG00000000303(Cdh1),ENSMUSG00000000402(Egfl6),ENSMUSG00000000567(Sox9),ENSMUSG00000000627(Sema4f),ENSMUSG00000000730(Dnmt3l),ENSMUSG00000000731(Aire),ENSMUSG00000000753(Serpinf1),ENSMUSG00000000782(Tcf7),ENSMUSG00000000861(Bcl11a),ENSMUSG00000000869(Il4),ENSMUSG00000000901(Mmp11),ENSMUSG00000000957(Mmp14),ENSMUSG000…
BP	GO:0010646	regulation of cell communication	503	553	1056	3174	< 1e-30	3.02611e-28	ENSMUSG00000000001(Gnai3),ENSMUSG00000000817(Fasl),ENSMUSG00000001020(S100a4),ENSMUSG00000001098(Kctd10),ENSMUSG00000001131(Timp1),ENSMUSG00000001507(Itga3),ENSMUSG00000001517(Foxm1),ENSMUSG00000001642(Akr1b3),ENSMUSG00000001995(Sipa1l2),ENSMUSG00000002015(Bcap31),ENSMUSG00000002250(Ppard),ENSMUSG00000002603(Tgfb1),ENSMUSG00000002944(Cd36),ENSMUSG00000003032(Klf4),ENSMUSG00000003200(Sh3gl1),ENSMU…	ENSMUSG00000000120(Ngfr),ENSMUSG00000000126(Wnt9a),ENSMUSG00000000142(Axin2),ENSMUSG00000000303(Cdh1),ENSMUSG00000000567(Sox9),ENSMUSG00000000869(Il4),ENSMUSG00000000889(Dbh),ENSMUSG00000000957(Mmp14),ENSMUSG00000001494(Sost),ENSMUSG00000001583(Tnk1),ENSMUSG00000001672(Marveld3),ENSMUSG00000001870(Ltbp1),ENSMUSG00000001985(Grik3),ENSMUSG00000002032(Tmem25),ENSMUSG00000002104(Rapsn),ENSMUSG0000000…
BP	GO:0007166	cell surface receptor signaling pathway	391	450	841	2408	< 1e-30	3.02611e-28	ENSMUSG00000000555(Itga5),ENSMUSG00000000706(Btn1a1),ENSMUSG00000000791(Il12rb1),ENSMUSG00000000817(Fasl),ENSMUSG00000001098(Kctd10),ENSMUSG00000001131(Timp1),ENSMUSG00000001227(Sema6b),ENSMUSG00000001507(Itga3),ENSMUSG00000002603(Tgfb1),ENSMUSG00000002944(Cd36),ENSMUSG00000003032(Klf4),ENSMUSG00000003200(Sh3gl1),ENSMUSG00000004508(Gab2),ENSMUSG00000004791(Pgf),ENSMUSG00000004947(Dtx2),ENSMUSG000…	ENSMUSG00000000120(Ngfr),ENSMUSG00000000126(Wnt9a),ENSMUSG00000000142(Axin2),ENSMUSG00000000157(Itgb2l),ENSMUSG00000000562(Adora3),ENSMUSG00000000567(Sox9),ENSMUSG00000000627(Sema4f),ENSMUSG00000000732(Icosl),ENSMUSG00000000782(Tcf7),ENSMUSG00000000869(Il4),ENSMUSG00000000889(Dbh),ENSMUSG00000000957(Mmp14),ENSMUSG00000001494(Sost),ENSMUSG00000001583(Tnk1),ENSMUSG00000001870(Ltbp1),ENSMUSG00000001…
BP	GO:0023051	regulation of signaling	505	554	1059	3196	< 1e-30	3.02611e-28	ENSMUSG00000000001(Gnai3),ENSMUSG00000000817(Fasl),ENSMUSG00000001020(S100a4),ENSMUSG00000001098(Kctd10),ENSMUSG00000001131(Timp1),ENSMUSG00000001507(Itga3),ENSMUSG00000001517(Foxm1),ENSMUSG00000001642(Akr1b3),ENSMUSG00000001995(Sipa1l2),ENSMUSG00000002015(Bcap31),ENSMUSG00000002250(Ppard),ENSMUSG00000002603(Tgfb1),ENSMUSG00000002944(Cd36),ENSMUSG00000003032(Klf4),ENSMUSG00000003200(Sh3gl1),ENSMU…	ENSMUSG00000000120(Ngfr),ENSMUSG00000000126(Wnt9a),ENSMUSG00000000142(Axin2),ENSMUSG00000000303(Cdh1),ENSMUSG00000000567(Sox9),ENSMUSG00000000869(Il4),ENSMUSG00000000889(Dbh),ENSMUSG00000000957(Mmp14),ENSMUSG00000001494(Sost),ENSMUSG00000001583(Tnk1),ENSMUSG00000001672(Marveld3),ENSMUSG00000001870(Ltbp1),ENSMUSG00000001985(Grik3),ENSMUSG00000002032(Tmem25),ENSMUSG00000002104(Rapsn),ENSMUSG0000000…
BP	GO:0048583	regulation of response to stimulus	593	594	1187	3679	< 1e-30	3.02611e-28	ENSMUSG00000000001(Gnai3),ENSMUSG00000000706(Btn1a1),ENSMUSG00000000791(Il12rb1),ENSMUSG00000000817(Fasl),ENSMUSG00000001020(S100a4),ENSMUSG00000001098(Kctd10),ENSMUSG00000001131(Timp1),ENSMUSG00000001227(Sema6b),ENSMUSG00000001507(Itga3),ENSMUSG00000001517(Foxm1),ENSMUSG00000001642(Akr1b3),ENSMUSG00000001995(Sipa1l2),ENSMUSG00000002015(Bcap31),ENSMUSG00000002250(Ppard),ENSMUSG00000002603(Tgfb1),…	ENSMUSG00000000120(Ngfr),ENSMUSG00000000126(Wnt9a),ENSMUSG00000000142(Axin2),ENSMUSG00000000320(Alox12),ENSMUSG00000000567(Sox9),ENSMUSG00000000627(Sema4f),ENSMUSG00000000732(Icosl),ENSMUSG00000000753(Serpinf1),ENSMUSG00000000869(Il4),ENSMUSG00000000889(Dbh),ENSMUSG00000000957(Mmp14),ENSMUSG00000001494(Sost),ENSMUSG00000001508(Sgca),ENSMUSG00000001583(Tnk1),ENSMUSG00000001672(Marveld3),ENSMUSG000…
BP	GO:0048518	positive regulation of biological process	838	945	1783	5984	< 1e-30	3.02611e-28	ENSMUSG00000000001(Gnai3),ENSMUSG00000000028(Cdc45),ENSMUSG00000000305(Cdh4),ENSMUSG00000000555(Itga5),ENSMUSG00000000628(Hk2),ENSMUSG00000000706(Btn1a1),ENSMUSG00000000708(Kat2b),ENSMUSG00000000791(Il12rb1),ENSMUSG00000000817(Fasl),ENSMUSG00000001020(S100a4),ENSMUSG00000001131(Timp1),ENSMUSG00000001227(Sema6b),ENSMUSG00000001403(Ube2c),ENSMUSG00000001507(Itga3),ENSMUSG00000001510(Dlx3),ENSMUSG00…	ENSMUSG00000000120(Ngfr),ENSMUSG00000000126(Wnt9a),ENSMUSG00000000142(Axin2),ENSMUSG00000000184(Ccnd2),ENSMUSG00000000303(Cdh1),ENSMUSG00000000320(Alox12),ENSMUSG00000000385(Tmprss2),ENSMUSG00000000392(Fap),ENSMUSG00000000402(Egfl6),ENSMUSG00000000567(Sox9),ENSMUSG00000000627(Sema4f),ENSMUSG00000000730(Dnmt3l),ENSMUSG00000000731(Aire),ENSMUSG00000000732(Icosl),ENSMUSG00000000753(Serpinf1),ENSMUSG…
BP	GO:0048468	cell development	324	489	813	2326	< 1e-30	3.02611e-28	ENSMUSG00000000305(Cdh4),ENSMUSG00000000708(Kat2b),ENSMUSG00000000817(Fasl),ENSMUSG00000001227(Sema6b),ENSMUSG00000001507(Itga3),ENSMUSG00000001627(Ifrd1),ENSMUSG00000001642(Akr1b3),ENSMUSG00000001751(Naglu),ENSMUSG00000002603(Tgfb1),ENSMUSG00000003032(Klf4),ENSMUSG00000003814(Calr),ENSMUSG00000004031(Brinp2),ENSMUSG00000004151(Etv1),ENSMUSG00000004207(Psap),ENSMUSG00000004460(Dnajb11),ENSMUSG000…	ENSMUSG00000000120(Ngfr),ENSMUSG00000000142(Axin2),ENSMUSG00000000303(Cdh1),ENSMUSG00000000567(Sox9),ENSMUSG00000000627(Sema4f),ENSMUSG00000000753(Serpinf1),ENSMUSG00000000861(Bcl11a),ENSMUSG00000001119(Col6a1),ENSMUSG00000001247(Lsr),ENSMUSG00000001420(Tmem79),ENSMUSG00000001435(Col18a1),ENSMUSG00000002324(Rec8),ENSMUSG00000002384(Bmp8b),ENSMUSG00000002985(Apoe),ENSMUSG00000003282(Plag1),ENSMUSG…
BP	GO:0006811	ion transport	271	340	611	1630	< 1e-30	3.02611e-28	ENSMUSG00000000088(Cox5a),ENSMUSG00000000216(Scnn1g),ENSMUSG00000000560(Gabra2),ENSMUSG00000000792(Slc5a5),ENSMUSG00000000805(Car4),ENSMUSG00000000817(Fasl),ENSMUSG00000001025(S100a6),ENSMUSG00000001095(Slc13a2),ENSMUSG00000001260(Gabrg1),ENSMUSG00000002250(Ppard),ENSMUSG00000002603(Tgfb1),ENSMUSG00000002944(Cd36),ENSMUSG00000003153(Slc2a3),ENSMUSG00000004113(Cacna1b),ENSMUSG00000004207(Psap),ENS…	ENSMUSG00000000794(Kcnn3),ENSMUSG00000000869(Il4),ENSMUSG00000001249(Hpn),ENSMUSG00000001741(Il16),ENSMUSG00000001985(Grik3),ENSMUSG00000002346(Slc25a42),ENSMUSG00000002908(Kcnn1),ENSMUSG00000002985(Apoe),ENSMUSG00000003352(Cacnb3),ENSMUSG00000003378(Grik5),ENSMUSG00000003411(Rab3b),ENSMUSG00000003484(Cyp4f18),ENSMUSG00000004035(Gstm7),ENSMUSG00000004110(Cacna1e),ENSMUSG00000004988(Fxyd4),ENSMUSG…
BP	GO:0006928	movement of cell or subcellular component	313	400	713	1983	< 1e-30	3.02611e-28	ENSMUSG00000000216(Scnn1g),ENSMUSG00000000305(Cdh4),ENSMUSG00000000555(Itga5),ENSMUSG00000001131(Timp1),ENSMUSG00000001227(Sema6b),ENSMUSG00000001507(Itga3),ENSMUSG00000002233(Rhoc),ENSMUSG00000002250(Ppard),ENSMUSG00000002603(Tgfb1),ENSMUSG00000003032(Klf4),ENSMUSG00000003665(Has1),ENSMUSG00000003779(Kif20a),ENSMUSG00000003814(Calr),ENSMUSG00000004151(Etv1),ENSMUSG00000004791(Pgf),ENSMUSG0000000…	ENSMUSG00000000120(Ngfr),ENSMUSG00000000157(Itgb2l),ENSMUSG00000000303(Cdh1),ENSMUSG00000000320(Alox12),ENSMUSG00000000392(Fap),ENSMUSG00000000567(Sox9),ENSMUSG00000000627(Sema4f),ENSMUSG00000000731(Aire),ENSMUSG00000000753(Serpinf1),ENSMUSG00000000869(Il4),ENSMUSG00000000889(Dbh),ENSMUSG00000000957(Mmp14),ENSMUSG00000001435(Col18a1),ENSMUSG00000001672(Marveld3),ENSMUSG00000001741(Il16),ENSMUSG00…
BP	GO:0006810	transport	663	695	1358	4393	< 1e-30	3.02611e-28	ENSMUSG00000000001(Gnai3),ENSMUSG00000000088(Cox5a),ENSMUSG00000000216(Scnn1g),ENSMUSG00000000560(Gabra2),ENSMUSG00000000594(Gm2a),ENSMUSG00000000628(Hk2),ENSMUSG00000000706(Btn1a1),ENSMUSG00000000792(Slc5a5),ENSMUSG00000000805(Car4),ENSMUSG00000000817(Fasl),ENSMUSG00000001025(S100a6),ENSMUSG00000001095(Slc13a2),ENSMUSG00000001260(Gabrg1),ENSMUSG00000001467(Cyp51),ENSMUSG00000002015(Bcap31),ENSMU…	ENSMUSG00000000120(Ngfr),ENSMUSG00000000154(Slc22a18),ENSMUSG00000000303(Cdh1),ENSMUSG00000000385(Tmprss2),ENSMUSG00000000794(Kcnn3),ENSMUSG00000000869(Il4),ENSMUSG00000000903(Vpreb3),ENSMUSG00000001247(Lsr),ENSMUSG00000001249(Hpn),ENSMUSG00000001420(Tmem79),ENSMUSG00000001741(Il16),ENSMUSG00000001985(Grik3),ENSMUSG00000002346(Slc25a42),ENSMUSG00000002908(Kcnn1),ENSMUSG00000002985(Apoe),ENSMUSG00…
BP	GO:0051234	establishment of localization	681	708	1389	4524	< 1e-30	3.02611e-28	ENSMUSG00000000001(Gnai3),ENSMUSG00000000088(Cox5a),ENSMUSG00000000216(Scnn1g),ENSMUSG00000000560(Gabra2),ENSMUSG00000000594(Gm2a),ENSMUSG00000000628(Hk2),ENSMUSG00000000706(Btn1a1),ENSMUSG00000000792(Slc5a5),ENSMUSG00000000805(Car4),ENSMUSG00000000817(Fasl),ENSMUSG00000001025(S100a6),ENSMUSG00000001095(Slc13a2),ENSMUSG00000001260(Gabrg1),ENSMUSG00000001467(Cyp51),ENSMUSG00000002015(Bcap31),ENSMU…	ENSMUSG00000000120(Ngfr),ENSMUSG00000000154(Slc22a18),ENSMUSG00000000303(Cdh1),ENSMUSG00000000385(Tmprss2),ENSMUSG00000000794(Kcnn3),ENSMUSG00000000869(Il4),ENSMUSG00000000903(Vpreb3),ENSMUSG00000001247(Lsr),ENSMUSG00000001249(Hpn),ENSMUSG00000001420(Tmem79),ENSMUSG00000001741(Il16),ENSMUSG00000001985(Grik3),ENSMUSG00000002104(Rapsn),ENSMUSG00000002346(Slc25a42),ENSMUSG00000002908(Kcnn1),ENSMUSG0…
BP	GO:0051049	regulation of transport	319	368	687	1945	< 1e-30	3.02611e-28	ENSMUSG00000000628(Hk2),ENSMUSG00000000706(Btn1a1),ENSMUSG00000001467(Cyp51),ENSMUSG00000002015(Bcap31),ENSMUSG00000002250(Ppard),ENSMUSG00000002603(Tgfb1),ENSMUSG00000002944(Cd36),ENSMUSG00000003200(Sh3gl1),ENSMUSG00000003814(Calr),ENSMUSG00000004113(Cacna1b),ENSMUSG00000004371(Il11),ENSMUSG00000004709(Cd244a),ENSMUSG00000005057(Sh2b2),ENSMUSG00000005220(Corin),ENSMUSG00000005413(Hmox1),ENSMUSG0…	ENSMUSG00000000303(Cdh1),ENSMUSG00000000869(Il4),ENSMUSG00000000903(Vpreb3),ENSMUSG00000001741(Il16),ENSMUSG00000002985(Apoe),ENSMUSG00000003352(Cacnb3),ENSMUSG00000003378(Grik5),ENSMUSG00000003411(Rab3b),ENSMUSG00000003452(Bicd1),ENSMUSG00000003484(Cyp4f18),ENSMUSG00000004035(Gstm7),ENSMUSG00000004110(Cacna1e),ENSMUSG00000004347(Pde1c),ENSMUSG00000004988(Fxyd4),ENSMUSG00000005089(Slc1a2),ENSMUSG…
BP	GO:0040011	locomotion	297	340	637	1781	< 1e-30	3.02611e-28	ENSMUSG00000000216(Scnn1g),ENSMUSG00000000305(Cdh4),ENSMUSG00000000555(Itga5),ENSMUSG00000001131(Timp1),ENSMUSG00000001227(Sema6b),ENSMUSG00000001507(Itga3),ENSMUSG00000002233(Rhoc),ENSMUSG00000002250(Ppard),ENSMUSG00000002603(Tgfb1),ENSMUSG00000003032(Klf4),ENSMUSG00000003665(Has1),ENSMUSG00000003814(Calr),ENSMUSG00000004151(Etv1),ENSMUSG00000004791(Pgf),ENSMUSG00000004951(Hspb1),ENSMUSG00000005…	ENSMUSG00000000120(Ngfr),ENSMUSG00000000157(Itgb2l),ENSMUSG00000000303(Cdh1),ENSMUSG00000000320(Alox12),ENSMUSG00000000392(Fap),ENSMUSG00000000567(Sox9),ENSMUSG00000000627(Sema4f),ENSMUSG00000000731(Aire),ENSMUSG00000000753(Serpinf1),ENSMUSG00000000869(Il4),ENSMUSG00000000889(Dbh),ENSMUSG00000000957(Mmp14),ENSMUSG00000001435(Col18a1),ENSMUSG00000001672(Marveld3),ENSMUSG00000001741(Il16),ENSMUSG00…
BP	GO:0045595	regulation of cell differentiation	291	378	669	1893	< 1e-30	3.02611e-28	ENSMUSG00000000305(Cdh4),ENSMUSG00000000708(Kat2b),ENSMUSG00000001227(Sema6b),ENSMUSG00000001507(Itga3),ENSMUSG00000001627(Ifrd1),ENSMUSG00000002250(Ppard),ENSMUSG00000002565(Scin),ENSMUSG00000002603(Tgfb1),ENSMUSG00000002944(Cd36),ENSMUSG00000002957(Ap2a2),ENSMUSG00000003032(Klf4),ENSMUSG00000003271(Sult2b1),ENSMUSG00000003814(Calr),ENSMUSG00000004031(Brinp2),ENSMUSG00000004460(Dnajb11),ENSMUSG0…	ENSMUSG00000000120(Ngfr),ENSMUSG00000000126(Wnt9a),ENSMUSG00000000142(Axin2),ENSMUSG00000000567(Sox9),ENSMUSG00000000627(Sema4f),ENSMUSG00000000753(Serpinf1),ENSMUSG00000000782(Tcf7),ENSMUSG00000000861(Bcl11a),ENSMUSG00000000869(Il4),ENSMUSG00000000901(Mmp11),ENSMUSG00000000957(Mmp14),ENSMUSG00000001249(Hpn),ENSMUSG00000001334(Fndc5),ENSMUSG00000001802(Lrp3),ENSMUSG00000002985(Apoe),ENSMUSG000000…
BP	GO:0009966	regulation of signal transduction	448	462	910	2767	< 1e-30	3.02611e-28	ENSMUSG00000000001(Gnai3),ENSMUSG00000000817(Fasl),ENSMUSG00000001020(S100a4),ENSMUSG00000001098(Kctd10),ENSMUSG00000001131(Timp1),ENSMUSG00000001507(Itga3),ENSMUSG00000001517(Foxm1),ENSMUSG00000001642(Akr1b3),ENSMUSG00000001995(Sipa1l2),ENSMUSG00000002015(Bcap31),ENSMUSG00000002250(Ppard),ENSMUSG00000002603(Tgfb1),ENSMUSG00000002944(Cd36),ENSMUSG00000003032(Klf4),ENSMUSG00000003200(Sh3gl1),ENSMU…	ENSMUSG00000000120(Ngfr),ENSMUSG00000000126(Wnt9a),ENSMUSG00000000142(Axin2),ENSMUSG00000000567(Sox9),ENSMUSG00000000869(Il4),ENSMUSG00000000889(Dbh),ENSMUSG00000000957(Mmp14),ENSMUSG00000001494(Sost),ENSMUSG00000001583(Tnk1),ENSMUSG00000001672(Marveld3),ENSMUSG00000001870(Ltbp1),ENSMUSG00000002032(Tmem25),ENSMUSG00000002384(Bmp8b),ENSMUSG00000002459(Rgs20),ENSMUSG00000002985(Apoe),ENSMUSG0000000…
BP	GO:0022008	neurogenesis	243	367	610	1709	< 1e-30	3.02611e-28	ENSMUSG00000000305(Cdh4),ENSMUSG00000000708(Kat2b),ENSMUSG00000001227(Sema6b),ENSMUSG00000001507(Itga3),ENSMUSG00000001627(Ifrd1),ENSMUSG00000001751(Naglu),ENSMUSG00000002603(Tgfb1),ENSMUSG00000003032(Klf4),ENSMUSG00000003814(Calr),ENSMUSG00000004031(Brinp2),ENSMUSG00000004151(Etv1),ENSMUSG00000004207(Psap),ENSMUSG00000004460(Dnajb11),ENSMUSG00000004885(Crabp2),ENSMUSG00000004951(Hspb1),ENSMUSG00…	ENSMUSG00000000120(Ngfr),ENSMUSG00000000126(Wnt9a),ENSMUSG00000000303(Cdh1),ENSMUSG00000000567(Sox9),ENSMUSG00000000627(Sema4f),ENSMUSG00000000753(Serpinf1),ENSMUSG00000000861(Bcl11a),ENSMUSG00000000957(Mmp14),ENSMUSG00000001657(Hoxc8),ENSMUSG00000001911(Nfix),ENSMUSG00000002985(Apoe),ENSMUSG00000003282(Plag1),ENSMUSG00000003934(Efnb3),ENSMUSG00000003948(Mmd),ENSMUSG00000005360(Slc1a3),ENSMUSG000…
BP	GO:0070887	cellular response to chemical stimulus	482	477	959	2965	< 1e-30	3.02611e-28	ENSMUSG00000000628(Hk2),ENSMUSG00000000708(Kat2b),ENSMUSG00000000791(Il12rb1),ENSMUSG00000000792(Slc5a5),ENSMUSG00000000817(Fasl),ENSMUSG00000001507(Itga3),ENSMUSG00000001642(Akr1b3),ENSMUSG00000002250(Ppard),ENSMUSG00000002603(Tgfb1),ENSMUSG00000002944(Cd36),ENSMUSG00000003032(Klf4),ENSMUSG00000003665(Has1),ENSMUSG00000003814(Calr),ENSMUSG00000004031(Brinp2),ENSMUSG00000004207(Psap),ENSMUSG00000…	ENSMUSG00000000120(Ngfr),ENSMUSG00000000303(Cdh1),ENSMUSG00000000320(Alox12),ENSMUSG00000000567(Sox9),ENSMUSG00000000753(Serpinf1),ENSMUSG00000000782(Tcf7),ENSMUSG00000000861(Bcl11a),ENSMUSG00000000869(Il4),ENSMUSG00000001119(Col6a1),ENSMUSG00000001494(Sost),ENSMUSG00000001663(Gstt1),ENSMUSG00000001741(Il16),ENSMUSG00000001870(Ltbp1),ENSMUSG00000002384(Bmp8b),ENSMUSG00000002985(Apoe),ENSMUSG00000…
BP	GO:0006812	cation transport	194	257	451	1171	< 1e-30	3.02611e-28	ENSMUSG00000000088(Cox5a),ENSMUSG00000000216(Scnn1g),ENSMUSG00000000817(Fasl),ENSMUSG00000001095(Slc13a2),ENSMUSG00000002603(Tgfb1),ENSMUSG00000004113(Cacna1b),ENSMUSG00000006273(Atp6v1b2),ENSMUSG00000006567(Atp7b),ENSMUSG00000006641(Slc5a6),ENSMUSG00000009687(Fxyd5),ENSMUSG00000010064(Slc38a3),ENSMUSG00000010095(Slc3a2),ENSMUSG00000010122(Slc47a1),ENSMUSG00000012819(Cdh23),ENSMUSG00000014077(Chp…	ENSMUSG00000000794(Kcnn3),ENSMUSG00000000869(Il4),ENSMUSG00000001249(Hpn),ENSMUSG00000001741(Il16),ENSMUSG00000002346(Slc25a42),ENSMUSG00000002908(Kcnn1),ENSMUSG00000003352(Cacnb3),ENSMUSG00000003411(Rab3b),ENSMUSG00000004035(Gstm7),ENSMUSG00000004110(Cacna1e),ENSMUSG00000004988(Fxyd4),ENSMUSG00000005360(Slc1a3),ENSMUSG00000006930(Hap1),ENSMUSG00000007034(Slc44a4),ENSMUSG00000007107(Atp1a4),ENSMU…
BP	GO:0048522	positive regulation of cellular process	747	836	1583	5358	< 1e-30	3.02611e-28	ENSMUSG00000000001(Gnai3),ENSMUSG00000000028(Cdc45),ENSMUSG00000000305(Cdh4),ENSMUSG00000000555(Itga5),ENSMUSG00000000628(Hk2),ENSMUSG00000000708(Kat2b),ENSMUSG00000000791(Il12rb1),ENSMUSG00000000817(Fasl),ENSMUSG00000001020(S100a4),ENSMUSG00000001131(Timp1),ENSMUSG00000001227(Sema6b),ENSMUSG00000001403(Ube2c),ENSMUSG00000001507(Itga3),ENSMUSG00000001510(Dlx3),ENSMUSG00000001517(Foxm1),ENSMUSG000…	ENSMUSG00000000120(Ngfr),ENSMUSG00000000126(Wnt9a),ENSMUSG00000000142(Axin2),ENSMUSG00000000184(Ccnd2),ENSMUSG00000000303(Cdh1),ENSMUSG00000000320(Alox12),ENSMUSG00000000392(Fap),ENSMUSG00000000567(Sox9),ENSMUSG00000000627(Sema4f),ENSMUSG00000000730(Dnmt3l),ENSMUSG00000000731(Aire),ENSMUSG00000000732(Icosl),ENSMUSG00000000753(Serpinf1),ENSMUSG00000000861(Bcl11a),ENSMUSG00000000869(Il4),ENSMUSG000…
BP	GO:0016477	cell migration	251	272	523	1421	< 1e-30	3.02611e-28	ENSMUSG00000000216(Scnn1g),ENSMUSG00000000555(Itga5),ENSMUSG00000001131(Timp1),ENSMUSG00000001227(Sema6b),ENSMUSG00000001507(Itga3),ENSMUSG00000002233(Rhoc),ENSMUSG00000002250(Ppard),ENSMUSG00000002603(Tgfb1),ENSMUSG00000003032(Klf4),ENSMUSG00000003665(Has1),ENSMUSG00000003814(Calr),ENSMUSG00000004791(Pgf),ENSMUSG00000004951(Hspb1),ENSMUSG00000005413(Hmox1),ENSMUSG00000005672(Kit),ENSMUSG00000006…	ENSMUSG00000000157(Itgb2l),ENSMUSG00000000303(Cdh1),ENSMUSG00000000320(Alox12),ENSMUSG00000000392(Fap),ENSMUSG00000000567(Sox9),ENSMUSG00000000627(Sema4f),ENSMUSG00000000731(Aire),ENSMUSG00000000753(Serpinf1),ENSMUSG00000000869(Il4),ENSMUSG00000000889(Dbh),ENSMUSG00000000957(Mmp14),ENSMUSG00000001435(Col18a1),ENSMUSG00000001672(Marveld3),ENSMUSG00000001741(Il16),ENSMUSG00000002985(Apoe),ENSMUSG00…
BP	GO:0098609	cell-cell adhesion	158	184	342	827	< 1e-30	3.02611e-28	ENSMUSG00000000305(Cdh4),ENSMUSG00000000325(Arvcf),ENSMUSG00000000555(Itga5),ENSMUSG00000000706(Btn1a1),ENSMUSG00000000791(Il12rb1),ENSMUSG00000001029(Icam2),ENSMUSG00000002603(Tgfb1),ENSMUSG00000003032(Klf4),ENSMUSG00000004709(Cd244a),ENSMUSG00000005161(Prdx2),ENSMUSG00000005672(Kit),ENSMUSG00000006574(Slc4a1),ENSMUSG00000007817(Zmiz1),ENSMUSG00000011256(Adam19),ENSMUSG00000012819(Cdh23),ENSMUSG…	ENSMUSG00000000303(Cdh1),ENSMUSG00000000320(Alox12),ENSMUSG00000000567(Sox9),ENSMUSG00000000732(Icosl),ENSMUSG00000000782(Tcf7),ENSMUSG00000000869(Il4),ENSMUSG00000000881(Dlg3),ENSMUSG00000003882(Il7r),ENSMUSG00000003934(Efnb3),ENSMUSG00000005087(Cd44),ENSMUSG00000005824(Tnfsf14),ENSMUSG00000005958(Ephb3),ENSMUSG00000006219(Fblim1),ENSMUSG00000006411(Nectin4),ENSMUSG00000006538(Ihh),ENSMUSG000000…
CC	GO:0044459	plasma membrane part	397	591	988	2737	< 1e-30	3.02611e-28	ENSMUSG00000000001(Gnai3),ENSMUSG00000000216(Scnn1g),ENSMUSG00000000305(Cdh4),ENSMUSG00000000555(Itga5),ENSMUSG00000000560(Gabra2),ENSMUSG00000000594(Gm2a),ENSMUSG00000000706(Btn1a1),ENSMUSG00000000791(Il12rb1),ENSMUSG00000000805(Car4),ENSMUSG00000000817(Fasl),ENSMUSG00000001025(S100a6),ENSMUSG00000001029(Icam2),ENSMUSG00000001227(Sema6b),ENSMUSG00000001260(Gabrg1),ENSMUSG00000001507(Itga3),ENSMU…	ENSMUSG00000000120(Ngfr),ENSMUSG00000000154(Slc22a18),ENSMUSG00000000157(Itgb2l),ENSMUSG00000000303(Cdh1),ENSMUSG00000000392(Fap),ENSMUSG00000000627(Sema4f),ENSMUSG00000000732(Icosl),ENSMUSG00000000869(Il4),ENSMUSG00000000881(Dlg3),ENSMUSG00000001249(Hpn),ENSMUSG00000001508(Sgca),ENSMUSG00000001583(Tnk1),ENSMUSG00000001985(Grik3),ENSMUSG00000002104(Rapsn),ENSMUSG00000002985(Apoe),ENSMUSG000000032…
CC	GO:0005576	extracellular region	466	412	878	2399	< 1e-30	3.02611e-28	ENSMUSG00000000216(Scnn1g),ENSMUSG00000000420(Galnt1),ENSMUSG00000000686(Abhd15),ENSMUSG00000000805(Car4),ENSMUSG00000000817(Fasl),ENSMUSG00000000983(Wfdc18),ENSMUSG00000001131(Timp1),ENSMUSG00000001227(Sema6b),ENSMUSG00000001642(Akr1b3),ENSMUSG00000001751(Naglu),ENSMUSG00000002204(Napsa),ENSMUSG00000002603(Tgfb1),ENSMUSG00000002808(Epdr1),ENSMUSG00000002847(Pla1a),ENSMUSG00000003779(Kif20a),ENSM…	ENSMUSG00000000126(Wnt9a),ENSMUSG00000000202(Btbd17),ENSMUSG00000000385(Tmprss2),ENSMUSG00000000392(Fap),ENSMUSG00000000402(Egfl6),ENSMUSG00000000627(Sema4f),ENSMUSG00000000753(Serpinf1),ENSMUSG00000000869(Il4),ENSMUSG00000000889(Dbh),ENSMUSG00000000901(Mmp11),ENSMUSG00000000903(Vpreb3),ENSMUSG00000000957(Mmp14),ENSMUSG00000001119(Col6a1),ENSMUSG00000001247(Lsr),ENSMUSG00000001249(Hpn),ENSMUSG000…
CC	GO:0098590	plasma membrane region	194	295	489	1186	< 1e-30	3.02611e-28	ENSMUSG00000000216(Scnn1g),ENSMUSG00000000555(Itga5),ENSMUSG00000000560(Gabra2),ENSMUSG00000000594(Gm2a),ENSMUSG00000000805(Car4),ENSMUSG00000000817(Fasl),ENSMUSG00000001260(Gabrg1),ENSMUSG00000001507(Itga3),ENSMUSG00000001864(Aif1l),ENSMUSG00000002944(Cd36),ENSMUSG00000003153(Slc2a3),ENSMUSG00000003657(Calb2),ENSMUSG00000004951(Hspb1),ENSMUSG00000005413(Hmox1),ENSMUSG00000006273(Atp6v1b2),ENSMUS…	ENSMUSG00000000120(Ngfr),ENSMUSG00000000154(Slc22a18),ENSMUSG00000000303(Cdh1),ENSMUSG00000000392(Fap),ENSMUSG00000000627(Sema4f),ENSMUSG00000000881(Dlg3),ENSMUSG00000001249(Hpn),ENSMUSG00000001985(Grik3),ENSMUSG00000002104(Rapsn),ENSMUSG00000003279(Dlgap1),ENSMUSG00000003352(Cacnb3),ENSMUSG00000003378(Grik5),ENSMUSG00000003484(Cyp4f18),ENSMUSG00000003872(Lin7b),ENSMUSG00000003934(Efnb3),ENSMUSG0…
CC	GO:0044421	extracellular region part	358	305	663	1771	< 1e-30	3.02611e-28	ENSMUSG00000000216(Scnn1g),ENSMUSG00000000805(Car4),ENSMUSG00000000817(Fasl),ENSMUSG00000001131(Timp1),ENSMUSG00000001227(Sema6b),ENSMUSG00000001642(Akr1b3),ENSMUSG00000001751(Naglu),ENSMUSG00000002204(Napsa),ENSMUSG00000002603(Tgfb1),ENSMUSG00000002847(Pla1a),ENSMUSG00000003779(Kif20a),ENSMUSG00000003814(Calr),ENSMUSG00000004207(Psap),ENSMUSG00000004371(Il11),ENSMUSG00000004460(Dnajb11),ENSMUSG0…	ENSMUSG00000000126(Wnt9a),ENSMUSG00000000392(Fap),ENSMUSG00000000402(Egfl6),ENSMUSG00000000627(Sema4f),ENSMUSG00000000753(Serpinf1),ENSMUSG00000000869(Il4),ENSMUSG00000000889(Dbh),ENSMUSG00000000901(Mmp11),ENSMUSG00000000903(Vpreb3),ENSMUSG00000000957(Mmp14),ENSMUSG00000001119(Col6a1),ENSMUSG00000001247(Lsr),ENSMUSG00000001270(Ckb),ENSMUSG00000001435(Col18a1),ENSMUSG00000001494(Sost),ENSMUSG00000…
CC	GO:0005615	extracellular space	326	257	583	1564	< 1e-30	3.02611e-28	ENSMUSG00000000216(Scnn1g),ENSMUSG00000000805(Car4),ENSMUSG00000000817(Fasl),ENSMUSG00000001131(Timp1),ENSMUSG00000001227(Sema6b),ENSMUSG00000001642(Akr1b3),ENSMUSG00000001751(Naglu),ENSMUSG00000002204(Napsa),ENSMUSG00000002603(Tgfb1),ENSMUSG00000002847(Pla1a),ENSMUSG00000003814(Calr),ENSMUSG00000004207(Psap),ENSMUSG00000004371(Il11),ENSMUSG00000004460(Dnajb11),ENSMUSG00000004473(Clec11a),ENSMUSG…	ENSMUSG00000000126(Wnt9a),ENSMUSG00000000392(Fap),ENSMUSG00000000627(Sema4f),ENSMUSG00000000753(Serpinf1),ENSMUSG00000000869(Il4),ENSMUSG00000000889(Dbh),ENSMUSG00000000901(Mmp11),ENSMUSG00000000903(Vpreb3),ENSMUSG00000000957(Mmp14),ENSMUSG00000001119(Col6a1),ENSMUSG00000001247(Lsr),ENSMUSG00000001270(Ckb),ENSMUSG00000001435(Col18a1),ENSMUSG00000001494(Sost),ENSMUSG00000001741(Il16),ENSMUSG000000…
CC	GO:0009986	cell surface	199	200	399	976	< 1e-30	3.02611e-28	ENSMUSG00000000216(Scnn1g),ENSMUSG00000000305(Cdh4),ENSMUSG00000000555(Itga5),ENSMUSG00000000706(Btn1a1),ENSMUSG00000000791(Il12rb1),ENSMUSG00000000805(Car4),ENSMUSG00000000817(Fasl),ENSMUSG00000001029(Icam2),ENSMUSG00000001507(Itga3),ENSMUSG00000001773(Folh1),ENSMUSG00000002233(Rhoc),ENSMUSG00000002603(Tgfb1),ENSMUSG00000002944(Cd36),ENSMUSG00000002980(Bcam),ENSMUSG00000003779(Kif20a),ENSMUSG000…	ENSMUSG00000000120(Ngfr),ENSMUSG00000000392(Fap),ENSMUSG00000000732(Icosl),ENSMUSG00000000869(Il4),ENSMUSG00000001249(Hpn),ENSMUSG00000002985(Apoe),ENSMUSG00000003379(Cd79a),ENSMUSG00000003882(Il7r),ENSMUSG00000004707(Ly9),ENSMUSG00000004730(Adgre1),ENSMUSG00000005087(Cd44),ENSMUSG00000005089(Slc1a2),ENSMUSG00000005360(Slc1a3),ENSMUSG00000005947(Itgae),ENSMUSG00000006576(Slc4a3),ENSMUSG0000000727…
CC	GO:0005887	integral component of plasma membrane	210	329	539	1440	< 1e-30	3.02611e-28	ENSMUSG00000000216(Scnn1g),ENSMUSG00000000305(Cdh4),ENSMUSG00000000555(Itga5),ENSMUSG00000000560(Gabra2),ENSMUSG00000000791(Il12rb1),ENSMUSG00000001029(Icam2),ENSMUSG00000001227(Sema6b),ENSMUSG00000001260(Gabrg1),ENSMUSG00000001507(Itga3),ENSMUSG00000001773(Folh1),ENSMUSG00000001943(Vsig2),ENSMUSG00000002015(Bcap31),ENSMUSG00000002980(Bcam),ENSMUSG00000003153(Slc2a3),ENSMUSG00000003665(Has1),ENSM…	ENSMUSG00000000157(Itgb2l),ENSMUSG00000000627(Sema4f),ENSMUSG00000000732(Icosl),ENSMUSG00000000881(Dlg3),ENSMUSG00000001249(Hpn),ENSMUSG00000001508(Sgca),ENSMUSG00000001985(Grik3),ENSMUSG00000003378(Grik5),ENSMUSG00000003934(Efnb3),ENSMUSG00000004631(Sgce),ENSMUSG00000004730(Adgre1),ENSMUSG00000004988(Fxyd4),ENSMUSG00000005089(Slc1a2),ENSMUSG00000005320(Fgfr4),ENSMUSG00000005360(Slc1a3),ENSMUSG00…
CC	GO:0031226	intrinsic component of plasma membrane	218	342	560	1513	< 1e-30	3.02611e-28	ENSMUSG00000000216(Scnn1g),ENSMUSG00000000305(Cdh4),ENSMUSG00000000555(Itga5),ENSMUSG00000000560(Gabra2),ENSMUSG00000000791(Il12rb1),ENSMUSG00000000805(Car4),ENSMUSG00000001029(Icam2),ENSMUSG00000001227(Sema6b),ENSMUSG00000001260(Gabrg1),ENSMUSG00000001507(Itga3),ENSMUSG00000001773(Folh1),ENSMUSG00000001943(Vsig2),ENSMUSG00000002015(Bcap31),ENSMUSG00000002980(Bcam),ENSMUSG00000003153(Slc2a3),ENSM…	ENSMUSG00000000157(Itgb2l),ENSMUSG00000000627(Sema4f),ENSMUSG00000000732(Icosl),ENSMUSG00000000881(Dlg3),ENSMUSG00000001249(Hpn),ENSMUSG00000001508(Sgca),ENSMUSG00000001985(Grik3),ENSMUSG00000003378(Grik5),ENSMUSG00000003934(Efnb3),ENSMUSG00000004631(Sgce),ENSMUSG00000004730(Adgre1),ENSMUSG00000004988(Fxyd4),ENSMUSG00000005089(Slc1a2),ENSMUSG00000005320(Fgfr4),ENSMUSG00000005360(Slc1a3),ENSMUSG00…
CC	GO:0030054	cell junction	168	283	451	1155	< 1e-30	3.02611e-28	ENSMUSG00000000305(Cdh4),ENSMUSG00000000325(Arvcf),ENSMUSG00000000555(Itga5),ENSMUSG00000000560(Gabra2),ENSMUSG00000001260(Gabrg1),ENSMUSG00000001507(Itga3),ENSMUSG00000001642(Akr1b3),ENSMUSG00000001864(Aif1l),ENSMUSG00000002565(Scin),ENSMUSG00000003200(Sh3gl1),ENSMUSG00000003657(Calb2),ENSMUSG00000005125(Ndrg1),ENSMUSG00000005672(Kit),ENSMUSG00000006304(Arpc2),ENSMUSG00000006567(Atp7b),ENSMUSG00…	ENSMUSG00000000120(Ngfr),ENSMUSG00000000157(Itgb2l),ENSMUSG00000000303(Cdh1),ENSMUSG00000000392(Fap),ENSMUSG00000000416(Cttnbp2),ENSMUSG00000000627(Sema4f),ENSMUSG00000000881(Dlg3),ENSMUSG00000001247(Lsr),ENSMUSG00000001249(Hpn),ENSMUSG00000001508(Sgca),ENSMUSG00000001672(Marveld3),ENSMUSG00000001985(Grik3),ENSMUSG00000002104(Rapsn),ENSMUSG00000003279(Dlgap1),ENSMUSG00000003378(Grik5),ENSMUSG0000…
CC	GO:0042995	cell projection	322	486	808	2396	< 1e-30	3.02611e-28	ENSMUSG00000000555(Itga5),ENSMUSG00000000560(Gabra2),ENSMUSG00000000805(Car4),ENSMUSG00000001020(S100a4),ENSMUSG00000001025(S100a6),ENSMUSG00000001029(Icam2),ENSMUSG00000001098(Kctd10),ENSMUSG00000001260(Gabrg1),ENSMUSG00000001507(Itga3),ENSMUSG00000001642(Akr1b3),ENSMUSG00000001864(Aif1l),ENSMUSG00000002233(Rhoc),ENSMUSG00000002565(Scin),ENSMUSG00000002603(Tgfb1),ENSMUSG00000002944(Cd36),ENSMUSG…	ENSMUSG00000000120(Ngfr),ENSMUSG00000000303(Cdh1),ENSMUSG00000000392(Fap),ENSMUSG00000000416(Cttnbp2),ENSMUSG00000000627(Sema4f),ENSMUSG00000000753(Serpinf1),ENSMUSG00000000794(Kcnn3),ENSMUSG00000000881(Dlg3),ENSMUSG00000000889(Dbh),ENSMUSG00000001270(Ckb),ENSMUSG00000001870(Ltbp1),ENSMUSG00000001985(Grik3),ENSMUSG00000002985(Apoe),ENSMUSG00000003354(Ccdc65),ENSMUSG00000003378(Grik5),ENSMUSG00000…
CC	GO:0097458	neuron part	273	418	691	1990	< 1e-30	3.02611e-28	ENSMUSG00000000560(Gabra2),ENSMUSG00000001020(S100a4),ENSMUSG00000001023(S100a5),ENSMUSG00000001260(Gabrg1),ENSMUSG00000001507(Itga3),ENSMUSG00000002233(Rhoc),ENSMUSG00000002603(Tgfb1),ENSMUSG00000002957(Ap2a2),ENSMUSG00000003153(Slc2a3),ENSMUSG00000003200(Sh3gl1),ENSMUSG00000003657(Calb2),ENSMUSG00000004031(Brinp2),ENSMUSG00000004113(Cacna1b),ENSMUSG00000004849(Ap1s1),ENSMUSG00000004951(Hspb1),E…	ENSMUSG00000000120(Ngfr),ENSMUSG00000000308(Ckmt1),ENSMUSG00000000416(Cttnbp2),ENSMUSG00000000627(Sema4f),ENSMUSG00000000753(Serpinf1),ENSMUSG00000000794(Kcnn3),ENSMUSG00000000861(Bcl11a),ENSMUSG00000000881(Dlg3),ENSMUSG00000000889(Dbh),ENSMUSG00000001249(Hpn),ENSMUSG00000001270(Ckb),ENSMUSG00000001870(Ltbp1),ENSMUSG00000001985(Grik3),ENSMUSG00000002908(Kcnn1),ENSMUSG00000002985(Apoe),ENSMUSG0000…
CC	GO:0120025	plasma membrane bounded cell projection	309	469	778	2317	1.6e-30	4.75375e-28	ENSMUSG00000000555(Itga5),ENSMUSG00000000560(Gabra2),ENSMUSG00000000805(Car4),ENSMUSG00000001020(S100a4),ENSMUSG00000001025(S100a6),ENSMUSG00000001029(Icam2),ENSMUSG00000001098(Kctd10),ENSMUSG00000001260(Gabrg1),ENSMUSG00000001507(Itga3),ENSMUSG00000001642(Akr1b3),ENSMUSG00000001864(Aif1l),ENSMUSG00000002233(Rhoc),ENSMUSG00000002603(Tgfb1),ENSMUSG00000002944(Cd36),ENSMUSG00000003657(Calb2),ENSMUS…	ENSMUSG00000000120(Ngfr),ENSMUSG00000000303(Cdh1),ENSMUSG00000000392(Fap),ENSMUSG00000000416(Cttnbp2),ENSMUSG00000000627(Sema4f),ENSMUSG00000000753(Serpinf1),ENSMUSG00000000794(Kcnn3),ENSMUSG00000000881(Dlg3),ENSMUSG00000000889(Dbh),ENSMUSG00000001270(Ckb),ENSMUSG00000001870(Ltbp1),ENSMUSG00000001985(Grik3),ENSMUSG00000002985(Apoe),ENSMUSG00000003354(Ccdc65),ENSMUSG00000003378(Grik5),ENSMUSG00000…
BP	GO:0048870	cell motility	261	303	564	1570	2.1e-30	6.02037e-28	ENSMUSG00000000216(Scnn1g),ENSMUSG00000000555(Itga5),ENSMUSG00000001131(Timp1),ENSMUSG00000001227(Sema6b),ENSMUSG00000001507(Itga3),ENSMUSG00000002233(Rhoc),ENSMUSG00000002250(Ppard),ENSMUSG00000002603(Tgfb1),ENSMUSG00000003032(Klf4),ENSMUSG00000003665(Has1),ENSMUSG00000003814(Calr),ENSMUSG00000004791(Pgf),ENSMUSG00000004951(Hspb1),ENSMUSG00000005413(Hmox1),ENSMUSG00000005672(Kit),ENSMUSG00000006…	ENSMUSG00000000157(Itgb2l),ENSMUSG00000000303(Cdh1),ENSMUSG00000000320(Alox12),ENSMUSG00000000392(Fap),ENSMUSG00000000567(Sox9),ENSMUSG00000000627(Sema4f),ENSMUSG00000000731(Aire),ENSMUSG00000000753(Serpinf1),ENSMUSG00000000869(Il4),ENSMUSG00000000889(Dbh),ENSMUSG00000000957(Mmp14),ENSMUSG00000001435(Col18a1),ENSMUSG00000001672(Marveld3),ENSMUSG00000001741(Il16),ENSMUSG00000002985(Apoe),ENSMUSG00…
BP	GO:0051674	localization of cell	261	303	564	1570	2.1e-30	6.02037e-28	ENSMUSG00000000216(Scnn1g),ENSMUSG00000000555(Itga5),ENSMUSG00000001131(Timp1),ENSMUSG00000001227(Sema6b),ENSMUSG00000001507(Itga3),ENSMUSG00000002233(Rhoc),ENSMUSG00000002250(Ppard),ENSMUSG00000002603(Tgfb1),ENSMUSG00000003032(Klf4),ENSMUSG00000003665(Has1),ENSMUSG00000003814(Calr),ENSMUSG00000004791(Pgf),ENSMUSG00000004951(Hspb1),ENSMUSG00000005413(Hmox1),ENSMUSG00000005672(Kit),ENSMUSG00000006…	ENSMUSG00000000157(Itgb2l),ENSMUSG00000000303(Cdh1),ENSMUSG00000000320(Alox12),ENSMUSG00000000392(Fap),ENSMUSG00000000567(Sox9),ENSMUSG00000000627(Sema4f),ENSMUSG00000000731(Aire),ENSMUSG00000000753(Serpinf1),ENSMUSG00000000869(Il4),ENSMUSG00000000889(Dbh),ENSMUSG00000000957(Mmp14),ENSMUSG00000001435(Col18a1),ENSMUSG00000001672(Marveld3),ENSMUSG00000001741(Il16),ENSMUSG00000002985(Apoe),ENSMUSG00…
MF	GO:0022857	transmembrane transporter activity	175	223	398	1007	3.2e-30	9.01572e-28	ENSMUSG00000000088(Cox5a),ENSMUSG00000000216(Scnn1g),ENSMUSG00000000560(Gabra2),ENSMUSG00000000792(Slc5a5),ENSMUSG00000001025(S100a6),ENSMUSG00000001095(Slc13a2),ENSMUSG00000001260(Gabrg1),ENSMUSG00000003153(Slc2a3),ENSMUSG00000004113(Cacna1b),ENSMUSG00000004668(Abca13),ENSMUSG00000006216(Clcnkb),ENSMUSG00000006567(Atp7b),ENSMUSG00000006574(Slc4a1),ENSMUSG00000006641(Slc5a6),ENSMUSG00000010064(Sl…	ENSMUSG00000000154(Slc22a18),ENSMUSG00000000794(Kcnn3),ENSMUSG00000001985(Grik3),ENSMUSG00000002346(Slc25a42),ENSMUSG00000002908(Kcnn1),ENSMUSG00000003352(Cacnb3),ENSMUSG00000003378(Grik5),ENSMUSG00000004110(Cacna1e),ENSMUSG00000004988(Fxyd4),ENSMUSG00000005089(Slc1a2),ENSMUSG00000005360(Slc1a3),ENSMUSG00000006576(Slc4a3),ENSMUSG00000007034(Slc44a4),ENSMUSG00000007107(Atp1a4),ENSMUSG00000007653(G…
MF	GO:0005215	transporter activity	210	249	459	1216	2e-29	5.53932e-27	ENSMUSG00000000088(Cox5a),ENSMUSG00000000216(Scnn1g),ENSMUSG00000000560(Gabra2),ENSMUSG00000000594(Gm2a),ENSMUSG00000000792(Slc5a5),ENSMUSG00000001025(S100a6),ENSMUSG00000001095(Slc13a2),ENSMUSG00000001260(Gabrg1),ENSMUSG00000002944(Cd36),ENSMUSG00000002957(Ap2a2),ENSMUSG00000003153(Slc2a3),ENSMUSG00000004113(Cacna1b),ENSMUSG00000004668(Abca13),ENSMUSG00000005220(Corin),ENSMUSG00000006014(Prg4),E…	ENSMUSG00000000154(Slc22a18),ENSMUSG00000000385(Tmprss2),ENSMUSG00000000794(Kcnn3),ENSMUSG00000001247(Lsr),ENSMUSG00000001985(Grik3),ENSMUSG00000002346(Slc25a42),ENSMUSG00000002908(Kcnn1),ENSMUSG00000002985(Apoe),ENSMUSG00000003352(Cacnb3),ENSMUSG00000003378(Grik5),ENSMUSG00000004110(Cacna1e),ENSMUSG00000004988(Fxyd4),ENSMUSG00000005089(Slc1a2),ENSMUSG00000005360(Slc1a3),ENSMUSG00000006576(Slc4a3…
BP	GO:0045597	positive regulation of cell differentiation	177	235	412	1067	2.1e-29	5.71935e-27	ENSMUSG00000000305(Cdh4),ENSMUSG00000000708(Kat2b),ENSMUSG00000001507(Itga3),ENSMUSG00000002565(Scin),ENSMUSG00000002603(Tgfb1),ENSMUSG00000002944(Cd36),ENSMUSG00000003271(Sult2b1),ENSMUSG00000003814(Calr),ENSMUSG00000004031(Brinp2),ENSMUSG00000004885(Crabp2),ENSMUSG00000004951(Hspb1),ENSMUSG00000005148(Klf5),ENSMUSG00000005672(Kit),ENSMUSG00000006304(Arpc2),ENSMUSG00000006457(Actn3),ENSMUSG00000…	ENSMUSG00000000120(Ngfr),ENSMUSG00000000126(Wnt9a),ENSMUSG00000000142(Axin2),ENSMUSG00000000567(Sox9),ENSMUSG00000000753(Serpinf1),ENSMUSG00000000861(Bcl11a),ENSMUSG00000000869(Il4),ENSMUSG00000000957(Mmp14),ENSMUSG00000001334(Fndc5),ENSMUSG00000001802(Lrp3),ENSMUSG00000002985(Apoe),ENSMUSG00000003282(Plag1),ENSMUSG00000003882(Il7r),ENSMUSG00000003948(Mmd),ENSMUSG00000005824(Tnfsf14),ENSMUSG00000…
BP	GO:0055085	transmembrane transport	225	294	519	1431	4.5e-29	1.20548e-26	ENSMUSG00000000088(Cox5a),ENSMUSG00000000216(Scnn1g),ENSMUSG00000000560(Gabra2),ENSMUSG00000000792(Slc5a5),ENSMUSG00000000817(Fasl),ENSMUSG00000001025(S100a6),ENSMUSG00000001095(Slc13a2),ENSMUSG00000001260(Gabrg1),ENSMUSG00000002603(Tgfb1),ENSMUSG00000003153(Slc2a3),ENSMUSG00000004113(Cacna1b),ENSMUSG00000004668(Abca13),ENSMUSG00000006216(Clcnkb),ENSMUSG00000006273(Atp6v1b2),ENSMUSG00000006567(At…	ENSMUSG00000000154(Slc22a18),ENSMUSG00000000794(Kcnn3),ENSMUSG00000001249(Hpn),ENSMUSG00000001985(Grik3),ENSMUSG00000002346(Slc25a42),ENSMUSG00000002908(Kcnn1),ENSMUSG00000003352(Cacnb3),ENSMUSG00000003378(Grik5),ENSMUSG00000004035(Gstm7),ENSMUSG00000004110(Cacna1e),ENSMUSG00000004988(Fxyd4),ENSMUSG00000005089(Slc1a2),ENSMUSG00000005360(Slc1a3),ENSMUSG00000006576(Slc4a3),ENSMUSG00000006930(Hap1),…
BP	GO:0048699	generation of neurons	218	347	565	1590	4.6e-29	1.2124e-26	ENSMUSG00000000305(Cdh4),ENSMUSG00000000708(Kat2b),ENSMUSG00000001227(Sema6b),ENSMUSG00000001507(Itga3),ENSMUSG00000001627(Ifrd1),ENSMUSG00000001751(Naglu),ENSMUSG00000002603(Tgfb1),ENSMUSG00000003032(Klf4),ENSMUSG00000003814(Calr),ENSMUSG00000004031(Brinp2),ENSMUSG00000004151(Etv1),ENSMUSG00000004207(Psap),ENSMUSG00000004460(Dnajb11),ENSMUSG00000004885(Crabp2),ENSMUSG00000004951(Hspb1),ENSMUSG00…	ENSMUSG00000000120(Ngfr),ENSMUSG00000000126(Wnt9a),ENSMUSG00000000303(Cdh1),ENSMUSG00000000567(Sox9),ENSMUSG00000000627(Sema4f),ENSMUSG00000000753(Serpinf1),ENSMUSG00000000861(Bcl11a),ENSMUSG00000001657(Hoxc8),ENSMUSG00000001911(Nfix),ENSMUSG00000002985(Apoe),ENSMUSG00000003282(Plag1),ENSMUSG00000003934(Efnb3),ENSMUSG00000003948(Mmd),ENSMUSG00000005360(Slc1a3),ENSMUSG00000005958(Ephb3),ENSMUSG000…
CC	GO:0043005	neuron projection	218	329	547	1523	5.5e-29	1.4266e-26	ENSMUSG00000000560(Gabra2),ENSMUSG00000001020(S100a4),ENSMUSG00000001260(Gabrg1),ENSMUSG00000001507(Itga3),ENSMUSG00000002233(Rhoc),ENSMUSG00000002603(Tgfb1),ENSMUSG00000003657(Calb2),ENSMUSG00000004031(Brinp2),ENSMUSG00000004113(Cacna1b),ENSMUSG00000004849(Ap1s1),ENSMUSG00000004951(Hspb1),ENSMUSG00000005640(Insrr),ENSMUSG00000006304(Arpc2),ENSMUSG00000008475(Arpc5),ENSMUSG00000009418(Nav1),ENSMU…	ENSMUSG00000000120(Ngfr),ENSMUSG00000000416(Cttnbp2),ENSMUSG00000000627(Sema4f),ENSMUSG00000000753(Serpinf1),ENSMUSG00000000794(Kcnn3),ENSMUSG00000000881(Dlg3),ENSMUSG00000000889(Dbh),ENSMUSG00000001270(Ckb),ENSMUSG00000001870(Ltbp1),ENSMUSG00000001985(Grik3),ENSMUSG00000002985(Apoe),ENSMUSG00000003378(Grik5),ENSMUSG00000004558(Ndrg2),ENSMUSG00000004631(Sgce),ENSMUSG00000005089(Slc1a2),ENSMUSG000…
MF	GO:0022891	substrate-specific transmembrane transporter activity	162	195	357	890	1.4e-28	3.57459e-26	ENSMUSG00000000088(Cox5a),ENSMUSG00000000216(Scnn1g),ENSMUSG00000000560(Gabra2),ENSMUSG00000000792(Slc5a5),ENSMUSG00000001025(S100a6),ENSMUSG00000001260(Gabrg1),ENSMUSG00000003153(Slc2a3),ENSMUSG00000004113(Cacna1b),ENSMUSG00000006216(Clcnkb),ENSMUSG00000006567(Atp7b),ENSMUSG00000006574(Slc4a1),ENSMUSG00000006641(Slc5a6),ENSMUSG00000010064(Slc38a3),ENSMUSG00000010095(Slc3a2),ENSMUSG00000010122(Sl…	ENSMUSG00000000794(Kcnn3),ENSMUSG00000001985(Grik3),ENSMUSG00000002346(Slc25a42),ENSMUSG00000002908(Kcnn1),ENSMUSG00000003352(Cacnb3),ENSMUSG00000003378(Grik5),ENSMUSG00000004110(Cacna1e),ENSMUSG00000004988(Fxyd4),ENSMUSG00000005089(Slc1a2),ENSMUSG00000005360(Slc1a3),ENSMUSG00000006576(Slc4a3),ENSMUSG00000007034(Slc44a4),ENSMUSG00000007107(Atp1a4),ENSMUSG00000007653(Gabrb2),ENSMUSG00000009246(Trp…
BP	GO:0072359	circulatory system development	224	197	421	1112	6.3e-28	1.58382e-25	ENSMUSG00000000555(Itga5),ENSMUSG00000000628(Hk2),ENSMUSG00000000708(Kat2b),ENSMUSG00000000817(Fasl),ENSMUSG00000001098(Kctd10),ENSMUSG00000001507(Itga3),ENSMUSG00000001510(Dlx3),ENSMUSG00000002250(Ppard),ENSMUSG00000002603(Tgfb1),ENSMUSG00000002944(Cd36),ENSMUSG00000003032(Klf4),ENSMUSG00000003814(Calr),ENSMUSG00000003865(Gys1),ENSMUSG00000004328(Hif3a),ENSMUSG00000004791(Pgf),ENSMUSG00000004951…	ENSMUSG00000000120(Ngfr),ENSMUSG00000000142(Axin2),ENSMUSG00000000392(Fap),ENSMUSG00000000567(Sox9),ENSMUSG00000000753(Serpinf1),ENSMUSG00000000957(Mmp14),ENSMUSG00000001435(Col18a1),ENSMUSG00000001870(Ltbp1),ENSMUSG00000002289(Angptl4),ENSMUSG00000002985(Apoe),ENSMUSG00000005836(Gata6),ENSMUSG00000005958(Ephb3),ENSMUSG00000006538(Ihh),ENSMUSG00000007877(Tcap),ENSMUSG00000008136(Fhl2),ENSMUSG0000…
BP	GO:0030182	neuron differentiation	202	311	513	1427	1.1e-27	2.7235e-25	ENSMUSG00000000305(Cdh4),ENSMUSG00000000708(Kat2b),ENSMUSG00000001227(Sema6b),ENSMUSG00000001507(Itga3),ENSMUSG00000001627(Ifrd1),ENSMUSG00000001751(Naglu),ENSMUSG00000003032(Klf4),ENSMUSG00000003814(Calr),ENSMUSG00000004031(Brinp2),ENSMUSG00000004151(Etv1),ENSMUSG00000004207(Psap),ENSMUSG00000004885(Crabp2),ENSMUSG00000004951(Hspb1),ENSMUSG00000005045(Chd5),ENSMUSG00000005220(Corin),ENSMUSG00000…	ENSMUSG00000000120(Ngfr),ENSMUSG00000000126(Wnt9a),ENSMUSG00000000303(Cdh1),ENSMUSG00000000567(Sox9),ENSMUSG00000000627(Sema4f),ENSMUSG00000000753(Serpinf1),ENSMUSG00000000861(Bcl11a),ENSMUSG00000001657(Hoxc8),ENSMUSG00000001911(Nfix),ENSMUSG00000002985(Apoe),ENSMUSG00000003934(Efnb3),ENSMUSG00000003948(Mmd),ENSMUSG00000005360(Slc1a3),ENSMUSG00000005958(Ephb3),ENSMUSG00000006476(Nsmf),ENSMUSG0000…
BP	GO:0034220	ion transmembrane transport	173	236	409	1084	8.7e-27	2.12189e-24	ENSMUSG00000000088(Cox5a),ENSMUSG00000000216(Scnn1g),ENSMUSG00000000560(Gabra2),ENSMUSG00000000792(Slc5a5),ENSMUSG00000000817(Fasl),ENSMUSG00000001025(S100a6),ENSMUSG00000001095(Slc13a2),ENSMUSG00000001260(Gabrg1),ENSMUSG00000002603(Tgfb1),ENSMUSG00000004113(Cacna1b),ENSMUSG00000006216(Clcnkb),ENSMUSG00000006273(Atp6v1b2),ENSMUSG00000006567(Atp7b),ENSMUSG00000006574(Slc4a1),ENSMUSG00000006641(Slc…	ENSMUSG00000000794(Kcnn3),ENSMUSG00000001249(Hpn),ENSMUSG00000001985(Grik3),ENSMUSG00000002346(Slc25a42),ENSMUSG00000002908(Kcnn1),ENSMUSG00000003352(Cacnb3),ENSMUSG00000003378(Grik5),ENSMUSG00000004035(Gstm7),ENSMUSG00000004110(Cacna1e),ENSMUSG00000004988(Fxyd4),ENSMUSG00000005089(Slc1a2),ENSMUSG00000005360(Slc1a3),ENSMUSG00000006576(Slc4a3),ENSMUSG00000006930(Hap1),ENSMUSG00000007107(Atp1a4),EN…
MF	GO:0022892	substrate-specific transporter activity	179	214	393	1025	9.6e-27	2.30696e-24	ENSMUSG00000000088(Cox5a),ENSMUSG00000000216(Scnn1g),ENSMUSG00000000560(Gabra2),ENSMUSG00000000594(Gm2a),ENSMUSG00000000792(Slc5a5),ENSMUSG00000001025(S100a6),ENSMUSG00000001260(Gabrg1),ENSMUSG00000003153(Slc2a3),ENSMUSG00000004113(Cacna1b),ENSMUSG00000004668(Abca13),ENSMUSG00000006216(Clcnkb),ENSMUSG00000006567(Atp7b),ENSMUSG00000006574(Slc4a1),ENSMUSG00000006641(Slc5a6),ENSMUSG00000010064(Slc38…	ENSMUSG00000000794(Kcnn3),ENSMUSG00000001985(Grik3),ENSMUSG00000002346(Slc25a42),ENSMUSG00000002908(Kcnn1),ENSMUSG00000002985(Apoe),ENSMUSG00000003352(Cacnb3),ENSMUSG00000003378(Grik5),ENSMUSG00000004110(Cacna1e),ENSMUSG00000004988(Fxyd4),ENSMUSG00000005089(Slc1a2),ENSMUSG00000005360(Slc1a3),ENSMUSG00000006576(Slc4a3),ENSMUSG00000007034(Slc44a4),ENSMUSG00000007107(Atp1a4),ENSMUSG00000007653(Gabrb…
BP	GO:0030001	metal ion transport	143	199	342	864	1e-26	2.36826e-24	ENSMUSG00000000216(Scnn1g),ENSMUSG00000000817(Fasl),ENSMUSG00000001095(Slc13a2),ENSMUSG00000002603(Tgfb1),ENSMUSG00000004113(Cacna1b),ENSMUSG00000006567(Atp7b),ENSMUSG00000006641(Slc5a6),ENSMUSG00000009687(Fxyd5),ENSMUSG00000010064(Slc38a3),ENSMUSG00000012819(Cdh23),ENSMUSG00000014077(Chp1),ENSMUSG00000017400(Stac2),ENSMUSG00000018470(Kcnab3),ENSMUSG00000018585(Atox1),ENSMUSG00000018900(Slc22a5),…	ENSMUSG00000000794(Kcnn3),ENSMUSG00000001249(Hpn),ENSMUSG00000001741(Il16),ENSMUSG00000002908(Kcnn1),ENSMUSG00000003352(Cacnb3),ENSMUSG00000004035(Gstm7),ENSMUSG00000004110(Cacna1e),ENSMUSG00000004988(Fxyd4),ENSMUSG00000005360(Slc1a3),ENSMUSG00000006930(Hap1),ENSMUSG00000007107(Atp1a4),ENSMUSG00000007122(Casq1),ENSMUSG00000009246(Trpm5),ENSMUSG00000011008(Mcoln2),ENSMUSG00000011751(Sptbn4),ENSMUS…
BP	GO:0042127	regulation of cell proliferation	298	284	582	1685	2.3e-26	5.36919e-24	ENSMUSG00000000001(Gnai3),ENSMUSG00000000706(Btn1a1),ENSMUSG00000000708(Kat2b),ENSMUSG00000000791(Il12rb1),ENSMUSG00000000817(Fasl),ENSMUSG00000001131(Timp1),ENSMUSG00000001517(Foxm1),ENSMUSG00000001642(Akr1b3),ENSMUSG00000002250(Ppard),ENSMUSG00000002565(Scin),ENSMUSG00000002603(Tgfb1),ENSMUSG00000003032(Klf4),ENSMUSG00000003271(Sult2b1),ENSMUSG00000003814(Calr),ENSMUSG00000004371(Il11),ENSMUSG0…	ENSMUSG00000000120(Ngfr),ENSMUSG00000000126(Wnt9a),ENSMUSG00000000142(Axin2),ENSMUSG00000000184(Ccnd2),ENSMUSG00000000320(Alox12),ENSMUSG00000000392(Fap),ENSMUSG00000000567(Sox9),ENSMUSG00000000732(Icosl),ENSMUSG00000000753(Serpinf1),ENSMUSG00000000782(Tcf7),ENSMUSG00000000869(Il4),ENSMUSG00000000889(Dbh),ENSMUSG00000001249(Hpn),ENSMUSG00000001349(Cnn1),ENSMUSG00000001435(Col18a1),ENSMUSG00000001…
MF	GO:0015075	ion transmembrane transporter activity	144	188	332	831	3e-26	6.90465e-24	ENSMUSG00000000088(Cox5a),ENSMUSG00000000216(Scnn1g),ENSMUSG00000000560(Gabra2),ENSMUSG00000000792(Slc5a5),ENSMUSG00000001025(S100a6),ENSMUSG00000001260(Gabrg1),ENSMUSG00000004113(Cacna1b),ENSMUSG00000006216(Clcnkb),ENSMUSG00000006567(Atp7b),ENSMUSG00000006574(Slc4a1),ENSMUSG00000006641(Slc5a6),ENSMUSG00000010064(Slc38a3),ENSMUSG00000010095(Slc3a2),ENSMUSG00000015575(Atp6v0e),ENSMUSG00000018470(K…	ENSMUSG00000000794(Kcnn3),ENSMUSG00000001985(Grik3),ENSMUSG00000002346(Slc25a42),ENSMUSG00000002908(Kcnn1),ENSMUSG00000003352(Cacnb3),ENSMUSG00000003378(Grik5),ENSMUSG00000004110(Cacna1e),ENSMUSG00000004988(Fxyd4),ENSMUSG00000005089(Slc1a2),ENSMUSG00000005360(Slc1a3),ENSMUSG00000006576(Slc4a3),ENSMUSG00000007034(Slc44a4),ENSMUSG00000007107(Atp1a4),ENSMUSG00000007653(Gabrb2),ENSMUSG00000009246(Trp…
BP	GO:0022603	regulation of anatomical structure morphogenesis	189	204	393	1042	1e-25	2.26958e-23	ENSMUSG00000000305(Cdh4),ENSMUSG00000000555(Itga5),ENSMUSG00000000628(Hk2),ENSMUSG00000000817(Fasl),ENSMUSG00000001227(Sema6b),ENSMUSG00000001627(Ifrd1),ENSMUSG00000002233(Rhoc),ENSMUSG00000002603(Tgfb1),ENSMUSG00000002944(Cd36),ENSMUSG00000003032(Klf4),ENSMUSG00000003814(Calr),ENSMUSG00000004791(Pgf),ENSMUSG00000004885(Crabp2),ENSMUSG00000004951(Hspb1),ENSMUSG00000005413(Hmox1),ENSMUSG0000000567…	ENSMUSG00000000120(Ngfr),ENSMUSG00000000320(Alox12),ENSMUSG00000000567(Sox9),ENSMUSG00000000627(Sema4f),ENSMUSG00000000753(Serpinf1),ENSMUSG00000000861(Bcl11a),ENSMUSG00000000869(Il4),ENSMUSG00000001249(Hpn),ENSMUSG00000001656(Hoxc11),ENSMUSG00000002985(Apoe),ENSMUSG00000003934(Efnb3),ENSMUSG00000005087(Cd44),ENSMUSG00000005131(4930550C14Rik),ENSMUSG00000005824(Tnfsf14),ENSMUSG00000005836(Gata6),…
BP	GO:0060429	epithelium development	178	234	412	1108	1.6e-25	3.58159e-23	ENSMUSG00000000216(Scnn1g),ENSMUSG00000000555(Itga5),ENSMUSG00000001504(Irx2),ENSMUSG00000001510(Dlx3),ENSMUSG00000001642(Akr1b3),ENSMUSG00000002233(Rhoc),ENSMUSG00000002603(Tgfb1),ENSMUSG00000003032(Klf4),ENSMUSG00000003271(Sult2b1),ENSMUSG00000004207(Psap),ENSMUSG00000004791(Pgf),ENSMUSG00000004894(Hapln2),ENSMUSG00000005148(Klf5),ENSMUSG00000005268(Prlr),ENSMUSG00000005355(Casp14),ENSMUSG00000…	ENSMUSG00000000120(Ngfr),ENSMUSG00000000142(Axin2),ENSMUSG00000000320(Alox12),ENSMUSG00000000567(Sox9),ENSMUSG00000000731(Aire),ENSMUSG00000000782(Tcf7),ENSMUSG00000000881(Dlg3),ENSMUSG00000000957(Mmp14),ENSMUSG00000001249(Hpn),ENSMUSG00000001420(Tmem79),ENSMUSG00000001435(Col18a1),ENSMUSG00000003051(Elf3),ENSMUSG00000004231(Pax2),ENSMUSG00000005087(Cd44),ENSMUSG00000005251(Ripk4),ENSMUSG00000005…
MF	GO:0046873	metal ion transmembrane transporter activity	77	118	195	415	1.7e-25	3.75401e-23	ENSMUSG00000000216(Scnn1g),ENSMUSG00000000792(Slc5a5),ENSMUSG00000004113(Cacna1b),ENSMUSG00000006567(Atp7b),ENSMUSG00000006641(Slc5a6),ENSMUSG00000018470(Kcnab3),ENSMUSG00000019558(Slc6a8),ENSMUSG00000020062(Slc5a8),ENSMUSG00000020226(Slc5a4b),ENSMUSG00000020411(Nipal4),ENSMUSG00000020722(Cacng1),ENSMUSG00000021313(Ryr2),ENSMUSG00000021730(Hcn1),ENSMUSG00000022094(Slc39a14),ENSMUSG00000022797(Tfr…	ENSMUSG00000000794(Kcnn3),ENSMUSG00000001985(Grik3),ENSMUSG00000002908(Kcnn1),ENSMUSG00000003352(Cacnb3),ENSMUSG00000003378(Grik5),ENSMUSG00000004110(Cacna1e),ENSMUSG00000004988(Fxyd4),ENSMUSG00000005089(Slc1a2),ENSMUSG00000005360(Slc1a3),ENSMUSG00000007107(Atp1a4),ENSMUSG00000009246(Trpm5),ENSMUSG00000011008(Mcoln2),ENSMUSG00000015968(Cacna1d),ENSMUSG00000017412(Cacnb4),ENSMUSG00000018340(Anxa6)…
BP	GO:0009887	animal organ morphogenesis	161	223	384	1017	3e-25	6.5364e-23	ENSMUSG00000000817(Fasl),ENSMUSG00000001504(Irx2),ENSMUSG00000001510(Dlx3),ENSMUSG00000001751(Naglu),ENSMUSG00000002603(Tgfb1),ENSMUSG00000004791(Pgf),ENSMUSG00000006205(Htra1),ENSMUSG00000006457(Actn3),ENSMUSG00000006715(Gmnn),ENSMUSG00000006800(Sulf2),ENSMUSG00000006948(Klk4),ENSMUSG00000007817(Zmiz1),ENSMUSG00000010461(Eya4),ENSMUSG00000010760(Phlda2),ENSMUSG00000012819(Cdh23),ENSMUSG000000140…	ENSMUSG00000000120(Ngfr),ENSMUSG00000000126(Wnt9a),ENSMUSG00000000142(Axin2),ENSMUSG00000000567(Sox9),ENSMUSG00000000690(Hoxb6),ENSMUSG00000000782(Tcf7),ENSMUSG00000000957(Mmp14),ENSMUSG00000001119(Col6a1),ENSMUSG00000001249(Hpn),ENSMUSG00000001656(Hoxc11),ENSMUSG00000001657(Hoxc8),ENSMUSG00000003051(Elf3),ENSMUSG00000003282(Plag1),ENSMUSG00000004231(Pax2),ENSMUSG00000005836(Gata6),ENSMUSG0000000…
BP	GO:0032501	multicellular organismal process	1026	1206	2232	8146	5.5e-25	1.18257e-22	ENSMUSG00000000001(Gnai3),ENSMUSG00000000216(Scnn1g),ENSMUSG00000000305(Cdh4),ENSMUSG00000000325(Arvcf),ENSMUSG00000000555(Itga5),ENSMUSG00000000560(Gabra2),ENSMUSG00000000594(Gm2a),ENSMUSG00000000628(Hk2),ENSMUSG00000000706(Btn1a1),ENSMUSG00000000708(Kat2b),ENSMUSG00000000791(Il12rb1),ENSMUSG00000000817(Fasl),ENSMUSG00000001098(Kctd10),ENSMUSG00000001131(Timp1),ENSMUSG00000001227(Sema6b),ENSMUSG…	ENSMUSG00000000085(Scmh1),ENSMUSG00000000120(Ngfr),ENSMUSG00000000126(Wnt9a),ENSMUSG00000000142(Axin2),ENSMUSG00000000184(Ccnd2),ENSMUSG00000000303(Cdh1),ENSMUSG00000000320(Alox12),ENSMUSG00000000392(Fap),ENSMUSG00000000402(Egfl6),ENSMUSG00000000416(Cttnbp2),ENSMUSG00000000567(Sox9),ENSMUSG00000000627(Sema4f),ENSMUSG00000000690(Hoxb6),ENSMUSG00000000730(Dnmt3l),ENSMUSG00000000731(Aire),ENSMUSG000…
BP	GO:0007267	cell-cell signaling	193	301	494	1396	6.6e-25	1.40066e-22	ENSMUSG00000000560(Gabra2),ENSMUSG00000001260(Gabrg1),ENSMUSG00000001507(Itga3),ENSMUSG00000002250(Ppard),ENSMUSG00000002603(Tgfb1),ENSMUSG00000003032(Klf4),ENSMUSG00000003200(Sh3gl1),ENSMUSG00000003657(Calb2),ENSMUSG00000004113(Cacna1b),ENSMUSG00000004371(Il11),ENSMUSG00000005148(Klf5),ENSMUSG00000005672(Kit),ENSMUSG00000005696(Sh2d1a),ENSMUSG00000005892(Trh),ENSMUSG00000006800(Sulf2),ENSMUSG000…	ENSMUSG00000000120(Ngfr),ENSMUSG00000000126(Wnt9a),ENSMUSG00000000142(Axin2),ENSMUSG00000000303(Cdh1),ENSMUSG00000000567(Sox9),ENSMUSG00000000782(Tcf7),ENSMUSG00000001494(Sost),ENSMUSG00000001985(Grik3),ENSMUSG00000002032(Tmem25),ENSMUSG00000002104(Rapsn),ENSMUSG00000002985(Apoe),ENSMUSG00000003279(Dlgap1),ENSMUSG00000003352(Cacnb3),ENSMUSG00000003378(Grik5),ENSMUSG00000003411(Rab3b),ENSMUSG00000…
BP	GO:0051960	regulation of nervous system development	135	250	385	1024	6.7e-25	1.40365e-22	ENSMUSG00000000305(Cdh4),ENSMUSG00000000708(Kat2b),ENSMUSG00000001227(Sema6b),ENSMUSG00000001507(Itga3),ENSMUSG00000001627(Ifrd1),ENSMUSG00000002603(Tgfb1),ENSMUSG00000003032(Klf4),ENSMUSG00000003814(Calr),ENSMUSG00000004031(Brinp2),ENSMUSG00000004460(Dnajb11),ENSMUSG00000004885(Crabp2),ENSMUSG00000004951(Hspb1),ENSMUSG00000005672(Kit),ENSMUSG00000006958(Chrd),ENSMUSG00000015619(Gata3),ENSMUSG000…	ENSMUSG00000000120(Ngfr),ENSMUSG00000000567(Sox9),ENSMUSG00000000627(Sema4f),ENSMUSG00000000753(Serpinf1),ENSMUSG00000000861(Bcl11a),ENSMUSG00000002985(Apoe),ENSMUSG00000003282(Plag1),ENSMUSG00000003934(Efnb3),ENSMUSG00000003948(Mmd),ENSMUSG00000005958(Ephb3),ENSMUSG00000006476(Nsmf),ENSMUSG00000006586(Runx1t1),ENSMUSG00000006930(Hap1),ENSMUSG00000007989(Fzd3),ENSMUSG00000008999(Bmp7),ENSMUSG0000…
CC	GO:0044456	synapse part	150	261	411	1108	7.4e-25	1.53068e-22	ENSMUSG00000000560(Gabra2),ENSMUSG00000001260(Gabrg1),ENSMUSG00000001507(Itga3),ENSMUSG00000002957(Ap2a2),ENSMUSG00000003153(Slc2a3),ENSMUSG00000003200(Sh3gl1),ENSMUSG00000003657(Calb2),ENSMUSG00000004113(Cacna1b),ENSMUSG00000004849(Ap1s1),ENSMUSG00000004951(Hspb1),ENSMUSG00000006304(Arpc2),ENSMUSG00000007659(Bcl2l1),ENSMUSG00000013415(Igf2bp1),ENSMUSG00000013629(Cad),ENSMUSG00000015533(Itga2),EN…	ENSMUSG00000000120(Ngfr),ENSMUSG00000000303(Cdh1),ENSMUSG00000000416(Cttnbp2),ENSMUSG00000000627(Sema4f),ENSMUSG00000000861(Bcl11a),ENSMUSG00000000881(Dlg3),ENSMUSG00000000889(Dbh),ENSMUSG00000001985(Grik3),ENSMUSG00000002104(Rapsn),ENSMUSG00000002985(Apoe),ENSMUSG00000003279(Dlgap1),ENSMUSG00000003378(Grik5),ENSMUSG00000003411(Rab3b),ENSMUSG00000003872(Lin7b),ENSMUSG00000003934(Efnb3),ENSMUSG000…
CC	GO:0031012	extracellular matrix	66	87	153	302	1.5e-24	3.06394e-22	ENSMUSG00000001131(Timp1),ENSMUSG00000002603(Tgfb1),ENSMUSG00000004894(Hapln2),ENSMUSG00000006529(Itih1),ENSMUSG00000007594(Hapln4),ENSMUSG00000015647(Lama5),ENSMUSG00000018593(Sparc),ENSMUSG00000018623(Mmp7),ENSMUSG00000019997(Ccn2),ENSMUSG00000020044(Timp3),ENSMUSG00000020583(Matn3),ENSMUSG00000020953(Coch),ENSMUSG00000021702(Thbs4),ENSMUSG00000021806(Nid2),ENSMUSG00000022371(Col14a1),ENSMUSG00…	ENSMUSG00000000402(Egfl6),ENSMUSG00000000753(Serpinf1),ENSMUSG00000000901(Mmp11),ENSMUSG00000000957(Mmp14),ENSMUSG00000001119(Col6a1),ENSMUSG00000001435(Col18a1),ENSMUSG00000001870(Ltbp1),ENSMUSG00000002985(Apoe),ENSMUSG00000006538(Ihh),ENSMUSG00000010311(Optc),ENSMUSG00000015085(Entpd2),ENSMUSG00000015957(Wnt11),ENSMUSG00000017344(Vtn),ENSMUSG00000019929(Dcn),ENSMUSG00000020019(Ntn4),ENSMUSG0000…
BP	GO:0098660	inorganic ion transmembrane transport	137	186	323	823	1.6e-24	3.22785e-22	ENSMUSG00000000088(Cox5a),ENSMUSG00000000216(Scnn1g),ENSMUSG00000000560(Gabra2),ENSMUSG00000000792(Slc5a5),ENSMUSG00000000817(Fasl),ENSMUSG00000001260(Gabrg1),ENSMUSG00000002603(Tgfb1),ENSMUSG00000004113(Cacna1b),ENSMUSG00000006216(Clcnkb),ENSMUSG00000006273(Atp6v1b2),ENSMUSG00000006567(Atp7b),ENSMUSG00000006574(Slc4a1),ENSMUSG00000009687(Fxyd5),ENSMUSG00000014077(Chp1),ENSMUSG00000015575(Atp6v0e…	ENSMUSG00000000794(Kcnn3),ENSMUSG00000001249(Hpn),ENSMUSG00000002908(Kcnn1),ENSMUSG00000003352(Cacnb3),ENSMUSG00000004035(Gstm7),ENSMUSG00000004110(Cacna1e),ENSMUSG00000004988(Fxyd4),ENSMUSG00000005360(Slc1a3),ENSMUSG00000006930(Hap1),ENSMUSG00000007107(Atp1a4),ENSMUSG00000007122(Casq1),ENSMUSG00000007653(Gabrb2),ENSMUSG00000009246(Trpm5),ENSMUSG00000011008(Mcoln2),ENSMUSG00000015968(Cacna1d),ENS…
MF	GO:0005509	calcium ion binding	128	158	286	701	2.3e-24	4.58345e-22	ENSMUSG00000000305(Cdh4),ENSMUSG00000001020(S100a4),ENSMUSG00000001021(S100a3),ENSMUSG00000001023(S100a5),ENSMUSG00000001025(S100a6),ENSMUSG00000001864(Aif1l),ENSMUSG00000002565(Scin),ENSMUSG00000002808(Epdr1),ENSMUSG00000003657(Calb2),ENSMUSG00000003814(Calr),ENSMUSG00000004113(Cacna1b),ENSMUSG00000005973(Rcn1),ENSMUSG00000006457(Actn3),ENSMUSG00000006800(Sulf2),ENSMUSG00000009646(Pla2g12b),ENSM…	ENSMUSG00000000303(Cdh1),ENSMUSG00000000402(Egfl6),ENSMUSG00000001508(Sgca),ENSMUSG00000001870(Ltbp1),ENSMUSG00000002341(Ncan),ENSMUSG00000004110(Cacna1e),ENSMUSG00000004730(Adgre1),ENSMUSG00000006538(Ihh),ENSMUSG00000006675(P4htm),ENSMUSG00000007122(Casq1),ENSMUSG00000007279(Scube2),ENSMUSG00000015467(Egfl8),ENSMUSG00000015568(Lpl),ENSMUSG00000017639(Rab11fip4),ENSMUSG00000017692(Rhbdl3),ENSMUSG…
BP	GO:0048519	negative regulation of biological process	738	788	1526	5301	2.5e-24	4.92199e-22	ENSMUSG00000000001(Gnai3),ENSMUSG00000000028(Cdc45),ENSMUSG00000000555(Itga5),ENSMUSG00000000628(Hk2),ENSMUSG00000000706(Btn1a1),ENSMUSG00000000708(Kat2b),ENSMUSG00000000817(Fasl),ENSMUSG00000000983(Wfdc18),ENSMUSG00000001098(Kctd10),ENSMUSG00000001131(Timp1),ENSMUSG00000001156(Mxd1),ENSMUSG00000001227(Sema6b),ENSMUSG00000001424(Snd1),ENSMUSG00000001467(Cyp51),ENSMUSG00000001504(Irx2),ENSMUSG0000…	ENSMUSG00000000085(Scmh1),ENSMUSG00000000120(Ngfr),ENSMUSG00000000126(Wnt9a),ENSMUSG00000000142(Axin2),ENSMUSG00000000184(Ccnd2),ENSMUSG00000000303(Cdh1),ENSMUSG00000000308(Ckmt1),ENSMUSG00000000320(Alox12),ENSMUSG00000000392(Fap),ENSMUSG00000000567(Sox9),ENSMUSG00000000627(Sema4f),ENSMUSG00000000730(Dnmt3l),ENSMUSG00000000753(Serpinf1),ENSMUSG00000000782(Tcf7),ENSMUSG00000000861(Bcl11a),ENSMUSG0…
BP	GO:0009605	response to external stimulus	411	361	772	2403	2.6e-24	5.05793e-22	ENSMUSG00000000305(Cdh4),ENSMUSG00000000791(Il12rb1),ENSMUSG00000000817(Fasl),ENSMUSG00000001227(Sema6b),ENSMUSG00000002250(Ppard),ENSMUSG00000002603(Tgfb1),ENSMUSG00000002944(Cd36),ENSMUSG00000003032(Klf4),ENSMUSG00000003814(Calr),ENSMUSG00000004151(Etv1),ENSMUSG00000004791(Pgf),ENSMUSG00000004849(Ap1s1),ENSMUSG00000004951(Hspb1),ENSMUSG00000005161(Prdx2),ENSMUSG00000005268(Prlr),ENSMUSG00000005…	ENSMUSG00000000120(Ngfr),ENSMUSG00000000320(Alox12),ENSMUSG00000000567(Sox9),ENSMUSG00000000627(Sema4f),ENSMUSG00000000753(Serpinf1),ENSMUSG00000000869(Il4),ENSMUSG00000000957(Mmp14),ENSMUSG00000001249(Hpn),ENSMUSG00000001494(Sost),ENSMUSG00000001663(Gstt1),ENSMUSG00000001741(Il16),ENSMUSG00000002289(Angptl4),ENSMUSG00000002384(Bmp8b),ENSMUSG00000002985(Apoe),ENSMUSG00000003352(Cacnb3),ENSMUSG000…
CC	GO:0012505	endomembrane system	619	552	1171	3898	3.2e-24	6.15191e-22	ENSMUSG00000000001(Gnai3),ENSMUSG00000000420(Galnt1),ENSMUSG00000000555(Itga5),ENSMUSG00000000560(Gabra2),ENSMUSG00000000628(Hk2),ENSMUSG00000000805(Car4),ENSMUSG00000001021(S100a3),ENSMUSG00000001025(S100a6),ENSMUSG00000001467(Cyp51),ENSMUSG00000001588(Acap1),ENSMUSG00000002014(Ssr4),ENSMUSG00000002015(Bcap31),ENSMUSG00000002204(Napsa),ENSMUSG00000002603(Tgfb1),ENSMUSG00000002847(Pla1a),ENSMUSG0…	ENSMUSG00000000120(Ngfr),ENSMUSG00000000154(Slc22a18),ENSMUSG00000000157(Itgb2l),ENSMUSG00000000184(Ccnd2),ENSMUSG00000000303(Cdh1),ENSMUSG00000000416(Cttnbp2),ENSMUSG00000000627(Sema4f),ENSMUSG00000000889(Dbh),ENSMUSG00000000903(Vpreb3),ENSMUSG00000000957(Mmp14),ENSMUSG00000001249(Hpn),ENSMUSG00000001334(Fndc5),ENSMUSG00000001420(Tmem79),ENSMUSG00000001494(Sost),ENSMUSG00000001865(Cpa3),ENSMUSG0…
BP	GO:0044057	regulation of system process	105	126	231	534	3.3e-24	6.27038e-22	ENSMUSG00000003032(Klf4),ENSMUSG00000004113(Cacna1b),ENSMUSG00000005220(Corin),ENSMUSG00000005672(Kit),ENSMUSG00000006457(Actn3),ENSMUSG00000012705(Retn),ENSMUSG00000015533(Itga2),ENSMUSG00000017446(C1qtnf1),ENSMUSG00000017697(Ada),ENSMUSG00000018500(Adora2b),ENSMUSG00000018900(Slc22a5),ENSMUSG00000019997(Ccn2),ENSMUSG00000020184(Mdm2),ENSMUSG00000021194(Chga),ENSMUSG00000021313(Ryr2),ENSMUSG0000…	ENSMUSG00000000120(Ngfr),ENSMUSG00000000889(Dbh),ENSMUSG00000001508(Sgca),ENSMUSG00000003352(Cacnb3),ENSMUSG00000005611(Mrvi1),ENSMUSG00000006576(Slc4a3),ENSMUSG00000007122(Casq1),ENSMUSG00000011751(Sptbn4),ENSMUSG00000015968(Cacna1d),ENSMUSG00000018238(Gdf9),ENSMUSG00000018340(Anxa6),ENSMUSG00000019789(Hey2),ENSMUSG00000020123(Avpr1a),ENSMUSG00000020439(Smtn),ENSMUSG00000020787(P2rx1),ENSMUSG000…
BP	GO:0043269	regulation of ion transport	109	178	287	711	4.7e-24	8.8279e-22	ENSMUSG00000002603(Tgfb1),ENSMUSG00000004113(Cacna1b),ENSMUSG00000005892(Trh),ENSMUSG00000006216(Clcnkb),ENSMUSG00000009687(Fxyd5),ENSMUSG00000010064(Slc38a3),ENSMUSG00000014077(Chp1),ENSMUSG00000017400(Stac2),ENSMUSG00000019970(Sgk1),ENSMUSG00000020169(Best3),ENSMUSG00000020689(Itgb3),ENSMUSG00000020722(Cacng1),ENSMUSG00000020793(Galr2),ENSMUSG00000020893(Per1),ENSMUSG00000020907(Rcvrn),ENSMUSG0…	ENSMUSG00000000869(Il4),ENSMUSG00000001741(Il16),ENSMUSG00000002985(Apoe),ENSMUSG00000003352(Cacnb3),ENSMUSG00000003411(Rab3b),ENSMUSG00000003484(Cyp4f18),ENSMUSG00000004035(Gstm7),ENSMUSG00000004110(Cacna1e),ENSMUSG00000004988(Fxyd4),ENSMUSG00000006930(Hap1),ENSMUSG00000007122(Casq1),ENSMUSG00000009246(Trpm5),ENSMUSG00000011751(Sptbn4),ENSMUSG00000015340(Cybb),ENSMUSG00000015968(Cacna1d),ENSMUSG…
BP	GO:0065009	regulation of molecular function	439	459	898	2880	7.2e-24	1.33699e-21	ENSMUSG00000000001(Gnai3),ENSMUSG00000000594(Gm2a),ENSMUSG00000000708(Kat2b),ENSMUSG00000000817(Fasl),ENSMUSG00000000983(Wfdc18),ENSMUSG00000001131(Timp1),ENSMUSG00000001588(Acap1),ENSMUSG00000001627(Ifrd1),ENSMUSG00000001995(Sipa1l2),ENSMUSG00000002015(Bcap31),ENSMUSG00000002233(Rhoc),ENSMUSG00000002250(Ppard),ENSMUSG00000002603(Tgfb1),ENSMUSG00000002944(Cd36),ENSMUSG00000003032(Klf4),ENSMUSG000…	ENSMUSG00000000120(Ngfr),ENSMUSG00000000126(Wnt9a),ENSMUSG00000000142(Axin2),ENSMUSG00000000184(Ccnd2),ENSMUSG00000000308(Ckmt1),ENSMUSG00000000320(Alox12),ENSMUSG00000000730(Dnmt3l),ENSMUSG00000000753(Serpinf1),ENSMUSG00000000869(Il4),ENSMUSG00000000881(Dlg3),ENSMUSG00000001249(Hpn),ENSMUSG00000002289(Angptl4),ENSMUSG00000002459(Rgs20),ENSMUSG00000002985(Apoe),ENSMUSG00000003352(Cacnb3),ENSMUSG0…
BP	GO:0048666	neuron development	165	258	423	1165	8.3e-24	1.52394e-21	ENSMUSG00000000305(Cdh4),ENSMUSG00000000708(Kat2b),ENSMUSG00000001227(Sema6b),ENSMUSG00000001507(Itga3),ENSMUSG00000001627(Ifrd1),ENSMUSG00000001751(Naglu),ENSMUSG00000003032(Klf4),ENSMUSG00000004151(Etv1),ENSMUSG00000004885(Crabp2),ENSMUSG00000004951(Hspb1),ENSMUSG00000012819(Cdh23),ENSMUSG00000015619(Gata3),ENSMUSG00000017929(B4galt5),ENSMUSG00000019970(Sgk1),ENSMUSG00000020099(Unc5b),ENSMUSG00…	ENSMUSG00000000120(Ngfr),ENSMUSG00000000303(Cdh1),ENSMUSG00000000627(Sema4f),ENSMUSG00000000753(Serpinf1),ENSMUSG00000000861(Bcl11a),ENSMUSG00000002985(Apoe),ENSMUSG00000003934(Efnb3),ENSMUSG00000005360(Slc1a3),ENSMUSG00000005958(Ephb3),ENSMUSG00000006476(Nsmf),ENSMUSG00000006538(Ihh),ENSMUSG00000006586(Runx1t1),ENSMUSG00000006930(Hap1),ENSMUSG00000007034(Slc44a4),ENSMUSG00000007653(Gabrb2),ENSMU…
MF	GO:0015267	channel activity	64	133	197	433	1.3e-23	2.33443e-21	ENSMUSG00000000216(Scnn1g),ENSMUSG00000000560(Gabra2),ENSMUSG00000001260(Gabrg1),ENSMUSG00000004113(Cacna1b),ENSMUSG00000006216(Clcnkb),ENSMUSG00000018470(Kcnab3),ENSMUSG00000018770(Atp5g3),ENSMUSG00000020169(Best3),ENSMUSG00000020722(Cacng1),ENSMUSG00000021313(Ryr2),ENSMUSG00000021730(Hcn1),ENSMUSG00000023033(Scn8a),ENSMUSG00000023959(Clic5),ENSMUSG00000027273(Snap25),ENSMUSG00000028420(Tmem38b)…	ENSMUSG00000000794(Kcnn3),ENSMUSG00000001985(Grik3),ENSMUSG00000002908(Kcnn1),ENSMUSG00000003352(Cacnb3),ENSMUSG00000003378(Grik5),ENSMUSG00000004110(Cacna1e),ENSMUSG00000004988(Fxyd4),ENSMUSG00000007653(Gabrb2),ENSMUSG00000009246(Trpm5),ENSMUSG00000011008(Mcoln2),ENSMUSG00000015340(Cybb),ENSMUSG00000015968(Cacna1d),ENSMUSG00000017412(Cacnb4),ENSMUSG00000018340(Anxa6),ENSMUSG00000020155(Kcnmb1),E…
MF	GO:0022803	passive transmembrane transporter activity	64	133	197	433	1.3e-23	2.33443e-21	ENSMUSG00000000216(Scnn1g),ENSMUSG00000000560(Gabra2),ENSMUSG00000001260(Gabrg1),ENSMUSG00000004113(Cacna1b),ENSMUSG00000006216(Clcnkb),ENSMUSG00000018470(Kcnab3),ENSMUSG00000018770(Atp5g3),ENSMUSG00000020169(Best3),ENSMUSG00000020722(Cacng1),ENSMUSG00000021313(Ryr2),ENSMUSG00000021730(Hcn1),ENSMUSG00000023033(Scn8a),ENSMUSG00000023959(Clic5),ENSMUSG00000027273(Snap25),ENSMUSG00000028420(Tmem38b)…	ENSMUSG00000000794(Kcnn3),ENSMUSG00000001985(Grik3),ENSMUSG00000002908(Kcnn1),ENSMUSG00000003352(Cacnb3),ENSMUSG00000003378(Grik5),ENSMUSG00000004110(Cacna1e),ENSMUSG00000004988(Fxyd4),ENSMUSG00000007653(Gabrb2),ENSMUSG00000009246(Trpm5),ENSMUSG00000011008(Mcoln2),ENSMUSG00000015340(Cybb),ENSMUSG00000015968(Cacna1d),ENSMUSG00000017412(Cacnb4),ENSMUSG00000018340(Anxa6),ENSMUSG00000020155(Kcnmb1),E…
MF	GO:0022890	inorganic cation transmembrane transporter activity	98	127	225	518	1.7e-23	2.98706e-21	ENSMUSG00000000088(Cox5a),ENSMUSG00000000216(Scnn1g),ENSMUSG00000000792(Slc5a5),ENSMUSG00000004113(Cacna1b),ENSMUSG00000006567(Atp7b),ENSMUSG00000006641(Slc5a6),ENSMUSG00000015575(Atp6v0e),ENSMUSG00000018470(Kcnab3),ENSMUSG00000018770(Atp5g3),ENSMUSG00000019210(Atp6v1e1),ENSMUSG00000019558(Slc6a8),ENSMUSG00000020062(Slc5a8),ENSMUSG00000020163(Uqcr11),ENSMUSG00000020226(Slc5a4b),ENSMUSG00000020411…	ENSMUSG00000000794(Kcnn3),ENSMUSG00000001985(Grik3),ENSMUSG00000002908(Kcnn1),ENSMUSG00000003352(Cacnb3),ENSMUSG00000003378(Grik5),ENSMUSG00000004110(Cacna1e),ENSMUSG00000004988(Fxyd4),ENSMUSG00000005089(Slc1a2),ENSMUSG00000005360(Slc1a3),ENSMUSG00000007107(Atp1a4),ENSMUSG00000009246(Trpm5),ENSMUSG00000011008(Mcoln2),ENSMUSG00000015968(Cacna1d),ENSMUSG00000017412(Cacnb4),ENSMUSG00000018340(Anxa6)…
BP	GO:0071310	cellular response to organic substance	381	375	756	2358	1.7e-23	2.98706e-21	ENSMUSG00000000628(Hk2),ENSMUSG00000000708(Kat2b),ENSMUSG00000000791(Il12rb1),ENSMUSG00000000792(Slc5a5),ENSMUSG00000000817(Fasl),ENSMUSG00000001507(Itga3),ENSMUSG00000001642(Akr1b3),ENSMUSG00000002250(Ppard),ENSMUSG00000002603(Tgfb1),ENSMUSG00000002944(Cd36),ENSMUSG00000003032(Klf4),ENSMUSG00000003665(Has1),ENSMUSG00000003814(Calr),ENSMUSG00000004031(Brinp2),ENSMUSG00000004207(Psap),ENSMUSG00000…	ENSMUSG00000000120(Ngfr),ENSMUSG00000000303(Cdh1),ENSMUSG00000000320(Alox12),ENSMUSG00000000567(Sox9),ENSMUSG00000000753(Serpinf1),ENSMUSG00000000782(Tcf7),ENSMUSG00000000861(Bcl11a),ENSMUSG00000001119(Col6a1),ENSMUSG00000001494(Sost),ENSMUSG00000001870(Ltbp1),ENSMUSG00000002384(Bmp8b),ENSMUSG00000003378(Grik5),ENSMUSG00000003882(Il7r),ENSMUSG00000004035(Gstm7),ENSMUSG00000004231(Pax2),ENSMUSG000…
MF	GO:0008324	cation transmembrane transporter activity	113	144	257	621	5.1e-23	8.86586e-21	ENSMUSG00000000088(Cox5a),ENSMUSG00000000216(Scnn1g),ENSMUSG00000000792(Slc5a5),ENSMUSG00000004113(Cacna1b),ENSMUSG00000006567(Atp7b),ENSMUSG00000006641(Slc5a6),ENSMUSG00000010064(Slc38a3),ENSMUSG00000015575(Atp6v0e),ENSMUSG00000018470(Kcnab3),ENSMUSG00000018770(Atp5g3),ENSMUSG00000018900(Slc22a5),ENSMUSG00000019210(Atp6v1e1),ENSMUSG00000019558(Slc6a8),ENSMUSG00000020062(Slc5a8),ENSMUSG0000002016…	ENSMUSG00000000794(Kcnn3),ENSMUSG00000001985(Grik3),ENSMUSG00000002346(Slc25a42),ENSMUSG00000002908(Kcnn1),ENSMUSG00000003352(Cacnb3),ENSMUSG00000003378(Grik5),ENSMUSG00000004110(Cacna1e),ENSMUSG00000004988(Fxyd4),ENSMUSG00000005089(Slc1a2),ENSMUSG00000005360(Slc1a3),ENSMUSG00000007034(Slc44a4),ENSMUSG00000007107(Atp1a4),ENSMUSG00000009246(Trpm5),ENSMUSG00000011008(Mcoln2),ENSMUSG00000015968(Cacn…
CC	GO:0036477	somatodendritic compartment	153	236	389	1057	8e-23	1.37608e-20	ENSMUSG00000000560(Gabra2),ENSMUSG00000001023(S100a5),ENSMUSG00000001260(Gabrg1),ENSMUSG00000002603(Tgfb1),ENSMUSG00000003153(Slc2a3),ENSMUSG00000003657(Calb2),ENSMUSG00000004031(Brinp2),ENSMUSG00000004113(Cacna1b),ENSMUSG00000004951(Hspb1),ENSMUSG00000006304(Arpc2),ENSMUSG00000010095(Slc3a2),ENSMUSG00000013415(Igf2bp1),ENSMUSG00000013629(Cad),ENSMUSG00000015812(Gnrh1),ENSMUSG00000017697(Ada),ENS…	ENSMUSG00000000120(Ngfr),ENSMUSG00000000308(Ckmt1),ENSMUSG00000000416(Cttnbp2),ENSMUSG00000000627(Sema4f),ENSMUSG00000000753(Serpinf1),ENSMUSG00000000794(Kcnn3),ENSMUSG00000000881(Dlg3),ENSMUSG00000000889(Dbh),ENSMUSG00000001249(Hpn),ENSMUSG00000001270(Ckb),ENSMUSG00000001870(Ltbp1),ENSMUSG00000001985(Grik3),ENSMUSG00000002908(Kcnn1),ENSMUSG00000002985(Apoe),ENSMUSG00000003378(Grik5),ENSMUSG00000…
BP	GO:0098655	cation transmembrane transport	141	184	325	847	9e-23	1.53197e-20	ENSMUSG00000000088(Cox5a),ENSMUSG00000000216(Scnn1g),ENSMUSG00000000817(Fasl),ENSMUSG00000002603(Tgfb1),ENSMUSG00000004113(Cacna1b),ENSMUSG00000006273(Atp6v1b2),ENSMUSG00000006567(Atp7b),ENSMUSG00000009687(Fxyd5),ENSMUSG00000010064(Slc38a3),ENSMUSG00000010095(Slc3a2),ENSMUSG00000010122(Slc47a1),ENSMUSG00000014077(Chp1),ENSMUSG00000015575(Atp6v0e),ENSMUSG00000017400(Stac2),ENSMUSG00000018470(Kcnab…	ENSMUSG00000000794(Kcnn3),ENSMUSG00000001249(Hpn),ENSMUSG00000002908(Kcnn1),ENSMUSG00000003352(Cacnb3),ENSMUSG00000004035(Gstm7),ENSMUSG00000004110(Cacna1e),ENSMUSG00000004988(Fxyd4),ENSMUSG00000005360(Slc1a3),ENSMUSG00000006930(Hap1),ENSMUSG00000007107(Atp1a4),ENSMUSG00000007122(Casq1),ENSMUSG00000009246(Trpm5),ENSMUSG00000011008(Mcoln2),ENSMUSG00000015968(Cacna1d),ENSMUSG00000017412(Cacnb4),ENS…
BP	GO:0031175	neuron projection development	149	232	381	1035	1e-22	1.68464e-20	ENSMUSG00000000305(Cdh4),ENSMUSG00000000708(Kat2b),ENSMUSG00000001227(Sema6b),ENSMUSG00000001507(Itga3),ENSMUSG00000001627(Ifrd1),ENSMUSG00000003032(Klf4),ENSMUSG00000004151(Etv1),ENSMUSG00000004885(Crabp2),ENSMUSG00000004951(Hspb1),ENSMUSG00000012819(Cdh23),ENSMUSG00000015619(Gata3),ENSMUSG00000017929(B4galt5),ENSMUSG00000019970(Sgk1),ENSMUSG00000020099(Unc5b),ENSMUSG00000020184(Mdm2),ENSMUSG000…	ENSMUSG00000000120(Ngfr),ENSMUSG00000000303(Cdh1),ENSMUSG00000000627(Sema4f),ENSMUSG00000000753(Serpinf1),ENSMUSG00000000861(Bcl11a),ENSMUSG00000002985(Apoe),ENSMUSG00000003934(Efnb3),ENSMUSG00000005958(Ephb3),ENSMUSG00000006476(Nsmf),ENSMUSG00000006586(Runx1t1),ENSMUSG00000006930(Hap1),ENSMUSG00000007989(Fzd3),ENSMUSG00000008575(Nfib),ENSMUSG00000008999(Bmp7),ENSMUSG00000011751(Sptbn4),ENSMUSG00…
BP	GO:0008283	cell proliferation	333	321	654	1998	1.1e-22	1.81567e-20	ENSMUSG00000000001(Gnai3),ENSMUSG00000000706(Btn1a1),ENSMUSG00000000708(Kat2b),ENSMUSG00000000791(Il12rb1),ENSMUSG00000000817(Fasl),ENSMUSG00000001131(Timp1),ENSMUSG00000001517(Foxm1),ENSMUSG00000001642(Akr1b3),ENSMUSG00000002250(Ppard),ENSMUSG00000002565(Scin),ENSMUSG00000002603(Tgfb1),ENSMUSG00000003032(Klf4),ENSMUSG00000003271(Sult2b1),ENSMUSG00000003500(Impdh1),ENSMUSG00000003814(Calr),ENSMUS…	ENSMUSG00000000120(Ngfr),ENSMUSG00000000126(Wnt9a),ENSMUSG00000000142(Axin2),ENSMUSG00000000184(Ccnd2),ENSMUSG00000000320(Alox12),ENSMUSG00000000392(Fap),ENSMUSG00000000567(Sox9),ENSMUSG00000000732(Icosl),ENSMUSG00000000753(Serpinf1),ENSMUSG00000000782(Tcf7),ENSMUSG00000000869(Il4),ENSMUSG00000000889(Dbh),ENSMUSG00000000957(Mmp14),ENSMUSG00000001249(Hpn),ENSMUSG00000001349(Cnn1),ENSMUSG0000000143…
CC	GO:0045202	synapse	188	315	503	1452	1.1e-22	1.81567e-20	ENSMUSG00000000555(Itga5),ENSMUSG00000000560(Gabra2),ENSMUSG00000001260(Gabrg1),ENSMUSG00000001507(Itga3),ENSMUSG00000002957(Ap2a2),ENSMUSG00000003153(Slc2a3),ENSMUSG00000003200(Sh3gl1),ENSMUSG00000003657(Calb2),ENSMUSG00000004113(Cacna1b),ENSMUSG00000004849(Ap1s1),ENSMUSG00000004951(Hspb1),ENSMUSG00000005125(Ndrg1),ENSMUSG00000006304(Arpc2),ENSMUSG00000007659(Bcl2l1),ENSMUSG00000010095(Slc3a2),E…	ENSMUSG00000000120(Ngfr),ENSMUSG00000000303(Cdh1),ENSMUSG00000000416(Cttnbp2),ENSMUSG00000000627(Sema4f),ENSMUSG00000000794(Kcnn3),ENSMUSG00000000861(Bcl11a),ENSMUSG00000000881(Dlg3),ENSMUSG00000000889(Dbh),ENSMUSG00000001333(Sync),ENSMUSG00000001985(Grik3),ENSMUSG00000002104(Rapsn),ENSMUSG00000002985(Apoe),ENSMUSG00000003279(Dlgap1),ENSMUSG00000003352(Cacnb3),ENSMUSG00000003378(Grik5),ENSMUSG000…
BP	GO:0060284	regulation of cell development	153	229	382	1042	2.1e-22	3.43161e-20	ENSMUSG00000000305(Cdh4),ENSMUSG00000000708(Kat2b),ENSMUSG00000001227(Sema6b),ENSMUSG00000001507(Itga3),ENSMUSG00000001627(Ifrd1),ENSMUSG00000002603(Tgfb1),ENSMUSG00000003032(Klf4),ENSMUSG00000003814(Calr),ENSMUSG00000004031(Brinp2),ENSMUSG00000004460(Dnajb11),ENSMUSG00000004885(Crabp2),ENSMUSG00000004951(Hspb1),ENSMUSG00000005672(Kit),ENSMUSG00000006304(Arpc2),ENSMUSG00000006457(Actn3),ENSMUSG00…	ENSMUSG00000000120(Ngfr),ENSMUSG00000000142(Axin2),ENSMUSG00000000567(Sox9),ENSMUSG00000000627(Sema4f),ENSMUSG00000000753(Serpinf1),ENSMUSG00000000861(Bcl11a),ENSMUSG00000002985(Apoe),ENSMUSG00000003282(Plag1),ENSMUSG00000003934(Efnb3),ENSMUSG00000003948(Mmd),ENSMUSG00000005958(Ephb3),ENSMUSG00000006476(Nsmf),ENSMUSG00000006586(Runx1t1),ENSMUSG00000006930(Hap1),ENSMUSG00000007989(Fzd3),ENSMUSG000…
BP	GO:0048646	anatomical structure formation involved in morphogenesis	203	203	406	1127	3.9e-22	6.30989e-20	ENSMUSG00000000555(Itga5),ENSMUSG00000000628(Hk2),ENSMUSG00000000817(Fasl),ENSMUSG00000001098(Kctd10),ENSMUSG00000001504(Irx2),ENSMUSG00000001507(Itga3),ENSMUSG00000002603(Tgfb1),ENSMUSG00000002944(Cd36),ENSMUSG00000003032(Klf4),ENSMUSG00000004207(Psap),ENSMUSG00000004328(Hif3a),ENSMUSG00000004791(Pgf),ENSMUSG00000004951(Hspb1),ENSMUSG00000005148(Klf5),ENSMUSG00000005413(Hmox1),ENSMUSG00000006205…	ENSMUSG00000000120(Ngfr),ENSMUSG00000000142(Axin2),ENSMUSG00000000392(Fap),ENSMUSG00000000567(Sox9),ENSMUSG00000000753(Serpinf1),ENSMUSG00000000869(Il4),ENSMUSG00000000957(Mmp14),ENSMUSG00000001119(Col6a1),ENSMUSG00000001435(Col18a1),ENSMUSG00000001656(Hoxc11),ENSMUSG00000001911(Nfix),ENSMUSG00000002289(Angptl4),ENSMUSG00000005628(Tmod4),ENSMUSG00000005824(Tnfsf14),ENSMUSG00000005836(Gata6),ENSMU…
BP	GO:0009719	response to endogenous stimulus	265	249	514	1509	9.1e-22	1.45787e-19	ENSMUSG00000000708(Kat2b),ENSMUSG00000000792(Slc5a5),ENSMUSG00000001131(Timp1),ENSMUSG00000001507(Itga3),ENSMUSG00000001642(Akr1b3),ENSMUSG00000002250(Ppard),ENSMUSG00000002603(Tgfb1),ENSMUSG00000002944(Cd36),ENSMUSG00000003032(Klf4),ENSMUSG00000003665(Has1),ENSMUSG00000003814(Calr),ENSMUSG00000004791(Pgf),ENSMUSG00000005057(Sh2b2),ENSMUSG00000005148(Klf5),ENSMUSG00000005268(Prlr),ENSMUSG00000005…	ENSMUSG00000000120(Ngfr),ENSMUSG00000000303(Cdh1),ENSMUSG00000000567(Sox9),ENSMUSG00000000753(Serpinf1),ENSMUSG00000000861(Bcl11a),ENSMUSG00000000957(Mmp14),ENSMUSG00000001119(Col6a1),ENSMUSG00000001249(Hpn),ENSMUSG00000001494(Sost),ENSMUSG00000001870(Ltbp1),ENSMUSG00000002384(Bmp8b),ENSMUSG00000002985(Apoe),ENSMUSG00000004035(Gstm7),ENSMUSG00000004231(Pax2),ENSMUSG00000004864(Mapk13),ENSMUSG0000…
MF	GO:0022838	substrate-specific channel activity	60	125	185	410	9.5e-22	1.50718e-19	ENSMUSG00000000216(Scnn1g),ENSMUSG00000000560(Gabra2),ENSMUSG00000001260(Gabrg1),ENSMUSG00000004113(Cacna1b),ENSMUSG00000006216(Clcnkb),ENSMUSG00000018470(Kcnab3),ENSMUSG00000020169(Best3),ENSMUSG00000020722(Cacng1),ENSMUSG00000021313(Ryr2),ENSMUSG00000021730(Hcn1),ENSMUSG00000023033(Scn8a),ENSMUSG00000023959(Clic5),ENSMUSG00000027273(Snap25),ENSMUSG00000028420(Tmem38b),ENSMUSG00000028435(Aqp3),E…	ENSMUSG00000000794(Kcnn3),ENSMUSG00000001985(Grik3),ENSMUSG00000002908(Kcnn1),ENSMUSG00000003352(Cacnb3),ENSMUSG00000003378(Grik5),ENSMUSG00000004110(Cacna1e),ENSMUSG00000004988(Fxyd4),ENSMUSG00000007653(Gabrb2),ENSMUSG00000009246(Trpm5),ENSMUSG00000011008(Mcoln2),ENSMUSG00000015340(Cybb),ENSMUSG00000015968(Cacna1d),ENSMUSG00000017412(Cacnb4),ENSMUSG00000018340(Anxa6),ENSMUSG00000020155(Kcnmb1),E…
BP	GO:0007167	enzyme linked receptor protein signaling pathway	163	166	329	872	1.2e-21	1.8855e-19	ENSMUSG00000000817(Fasl),ENSMUSG00000001507(Itga3),ENSMUSG00000002603(Tgfb1),ENSMUSG00000004508(Gab2),ENSMUSG00000004791(Pgf),ENSMUSG00000004951(Hspb1),ENSMUSG00000005057(Sh2b2),ENSMUSG00000005268(Prlr),ENSMUSG00000005640(Insrr),ENSMUSG00000005672(Kit),ENSMUSG00000006205(Htra1),ENSMUSG00000006800(Sulf2),ENSMUSG00000006958(Chrd),ENSMUSG00000007817(Zmiz1),ENSMUSG00000015619(Gata3),ENSMUSG0000001691…	ENSMUSG00000000120(Ngfr),ENSMUSG00000000567(Sox9),ENSMUSG00000001494(Sost),ENSMUSG00000001583(Tnk1),ENSMUSG00000001870(Ltbp1),ENSMUSG00000002384(Bmp8b),ENSMUSG00000003934(Efnb3),ENSMUSG00000005320(Fgfr4),ENSMUSG00000005533(Igf1r),ENSMUSG00000005836(Gata6),ENSMUSG00000005958(Ephb3),ENSMUSG00000006930(Hap1),ENSMUSG00000008999(Bmp7),ENSMUSG00000009376(Met),ENSMUSG00000013766(Ly6g6e),ENSMUSG000000144…
BP	GO:0008015	blood circulation	99	106	205	474	1.3e-21	2.02317e-19	ENSMUSG00000000708(Kat2b),ENSMUSG00000002250(Ppard),ENSMUSG00000002603(Tgfb1),ENSMUSG00000002944(Cd36),ENSMUSG00000004113(Cacna1b),ENSMUSG00000005220(Corin),ENSMUSG00000005413(Hmox1),ENSMUSG00000017697(Ada),ENSMUSG00000018500(Adora2b),ENSMUSG00000018932(Map2k3),ENSMUSG00000019997(Ccn2),ENSMUSG00000020184(Mdm2),ENSMUSG00000020572(Nampt),ENSMUSG00000021194(Chga),ENSMUSG00000021313(Ryr2),ENSMUSG0000…	ENSMUSG00000000320(Alox12),ENSMUSG00000000889(Dbh),ENSMUSG00000001865(Cpa3),ENSMUSG00000002985(Apoe),ENSMUSG00000003484(Cyp4f18),ENSMUSG00000005611(Mrvi1),ENSMUSG00000006576(Slc4a3),ENSMUSG00000007877(Tcap),ENSMUSG00000011751(Sptbn4),ENSMUSG00000015968(Cacna1d),ENSMUSG00000019326(Aoc3),ENSMUSG00000019787(Trdn),ENSMUSG00000019789(Hey2),ENSMUSG00000020123(Avpr1a),ENSMUSG00000020155(Kcnmb1),ENSMUSG0…
BP	GO:0023056	positive regulation of signaling	275	303	578	1741	1.5e-21	2.31241e-19	ENSMUSG00000000817(Fasl),ENSMUSG00000001020(S100a4),ENSMUSG00000001642(Akr1b3),ENSMUSG00000002015(Bcap31),ENSMUSG00000002250(Ppard),ENSMUSG00000002603(Tgfb1),ENSMUSG00000002944(Cd36),ENSMUSG00000003657(Calb2),ENSMUSG00000003814(Calr),ENSMUSG00000004113(Cacna1b),ENSMUSG00000004207(Psap),ENSMUSG00000004371(Il11),ENSMUSG00000005045(Chd5),ENSMUSG00000005057(Sh2b2),ENSMUSG00000005161(Prdx2),ENSMUSG000…	ENSMUSG00000000120(Ngfr),ENSMUSG00000000126(Wnt9a),ENSMUSG00000000567(Sox9),ENSMUSG00000000869(Il4),ENSMUSG00000002104(Rapsn),ENSMUSG00000002384(Bmp8b),ENSMUSG00000002985(Apoe),ENSMUSG00000003352(Cacnb3),ENSMUSG00000003411(Rab3b),ENSMUSG00000003882(Il7r),ENSMUSG00000004035(Gstm7),ENSMUSG00000004085(Map3k20),ENSMUSG00000005087(Cd44),ENSMUSG00000005320(Fgfr4),ENSMUSG00000005360(Slc1a3),ENSMUSG00000…
BP	GO:0010647	positive regulation of cell communication	273	303	576	1735	1.7e-21	2.59623e-19	ENSMUSG00000000817(Fasl),ENSMUSG00000001020(S100a4),ENSMUSG00000001642(Akr1b3),ENSMUSG00000002015(Bcap31),ENSMUSG00000002250(Ppard),ENSMUSG00000002603(Tgfb1),ENSMUSG00000002944(Cd36),ENSMUSG00000003657(Calb2),ENSMUSG00000003814(Calr),ENSMUSG00000004113(Cacna1b),ENSMUSG00000004207(Psap),ENSMUSG00000004371(Il11),ENSMUSG00000005045(Chd5),ENSMUSG00000005057(Sh2b2),ENSMUSG00000005161(Prdx2),ENSMUSG000…	ENSMUSG00000000120(Ngfr),ENSMUSG00000000126(Wnt9a),ENSMUSG00000000567(Sox9),ENSMUSG00000000869(Il4),ENSMUSG00000002104(Rapsn),ENSMUSG00000002384(Bmp8b),ENSMUSG00000002985(Apoe),ENSMUSG00000003352(Cacnb3),ENSMUSG00000003411(Rab3b),ENSMUSG00000003882(Il7r),ENSMUSG00000004035(Gstm7),ENSMUSG00000004085(Map3k20),ENSMUSG00000005087(Cd44),ENSMUSG00000005320(Fgfr4),ENSMUSG00000005360(Slc1a3),ENSMUSG00000…
CC	GO:0097060	synaptic membrane	56	138	194	441	2.5e-21	3.78264e-19	ENSMUSG00000000560(Gabra2),ENSMUSG00000001260(Gabrg1),ENSMUSG00000001507(Itga3),ENSMUSG00000003153(Slc2a3),ENSMUSG00000003657(Calb2),ENSMUSG00000004951(Hspb1),ENSMUSG00000019558(Slc6a8),ENSMUSG00000020368(Canx),ENSMUSG00000020598(Nrcam),ENSMUSG00000020689(Itgb3),ENSMUSG00000022494(Shisa9),ENSMUSG00000022602(Arc),ENSMUSG00000024873(Cnih2),ENSMUSG00000024912(Fosl1),ENSMUSG00000025161(Slc16a3),ENSMU…	ENSMUSG00000000627(Sema4f),ENSMUSG00000001985(Grik3),ENSMUSG00000002104(Rapsn),ENSMUSG00000003279(Dlgap1),ENSMUSG00000003378(Grik5),ENSMUSG00000003872(Lin7b),ENSMUSG00000003934(Efnb3),ENSMUSG00000005089(Slc1a2),ENSMUSG00000007653(Gabrb2),ENSMUSG00000013236(Ptprs),ENSMUSG00000015476(Prrt1),ENSMUSG00000015968(Cacna1d),ENSMUSG00000017167(Cntnap1),ENSMUSG00000017978(Cadps2),ENSMUSG00000019906(Lin7a),…
MF	GO:0005216	ion channel activity	58	122	180	399	3.5e-21	5.24711e-19	ENSMUSG00000000216(Scnn1g),ENSMUSG00000000560(Gabra2),ENSMUSG00000001260(Gabrg1),ENSMUSG00000004113(Cacna1b),ENSMUSG00000006216(Clcnkb),ENSMUSG00000018470(Kcnab3),ENSMUSG00000020169(Best3),ENSMUSG00000020722(Cacng1),ENSMUSG00000021313(Ryr2),ENSMUSG00000021730(Hcn1),ENSMUSG00000023033(Scn8a),ENSMUSG00000023959(Clic5),ENSMUSG00000027273(Snap25),ENSMUSG00000028420(Tmem38b),ENSMUSG00000028931(Kcnab2)…	ENSMUSG00000000794(Kcnn3),ENSMUSG00000001985(Grik3),ENSMUSG00000002908(Kcnn1),ENSMUSG00000003352(Cacnb3),ENSMUSG00000003378(Grik5),ENSMUSG00000004110(Cacna1e),ENSMUSG00000004988(Fxyd4),ENSMUSG00000007653(Gabrb2),ENSMUSG00000009246(Trpm5),ENSMUSG00000011008(Mcoln2),ENSMUSG00000015340(Cybb),ENSMUSG00000015968(Cacna1d),ENSMUSG00000017412(Cacnb4),ENSMUSG00000018340(Anxa6),ENSMUSG00000020155(Kcnmb1),E…
BP	GO:0032989	cellular component morphogenesis	157	251	408	1147	4.4e-21	6.5364e-19	ENSMUSG00000000305(Cdh4),ENSMUSG00000001227(Sema6b),ENSMUSG00000001627(Ifrd1),ENSMUSG00000002233(Rhoc),ENSMUSG00000003814(Calr),ENSMUSG00000004151(Etv1),ENSMUSG00000004885(Crabp2),ENSMUSG00000005672(Kit),ENSMUSG00000006304(Arpc2),ENSMUSG00000007659(Bcl2l1),ENSMUSG00000012819(Cdh23),ENSMUSG00000015468(Notch4),ENSMUSG00000015619(Gata3),ENSMUSG00000015647(Lama5),ENSMUSG00000015745(Plekho1),ENSMUSG00…	ENSMUSG00000000120(Ngfr),ENSMUSG00000000627(Sema4f),ENSMUSG00000000861(Bcl11a),ENSMUSG00000001119(Col6a1),ENSMUSG00000001249(Hpn),ENSMUSG00000001435(Col18a1),ENSMUSG00000002985(Apoe),ENSMUSG00000003882(Il7r),ENSMUSG00000003934(Efnb3),ENSMUSG00000005087(Cd44),ENSMUSG00000005360(Slc1a3),ENSMUSG00000005628(Tmod4),ENSMUSG00000005958(Ephb3),ENSMUSG00000006219(Fblim1),ENSMUSG00000006476(Nsmf),ENSMUSG00…
BP	GO:0035556	intracellular signal transduction	385	415	800	2567	5e-21	7.36081e-19	ENSMUSG00000000817(Fasl),ENSMUSG00000001020(S100a4),ENSMUSG00000001098(Kctd10),ENSMUSG00000001507(Itga3),ENSMUSG00000001517(Foxm1),ENSMUSG00000001642(Akr1b3),ENSMUSG00000001995(Sipa1l2),ENSMUSG00000002015(Bcap31),ENSMUSG00000002233(Rhoc),ENSMUSG00000002250(Ppard),ENSMUSG00000002603(Tgfb1),ENSMUSG00000002944(Cd36),ENSMUSG00000003032(Klf4),ENSMUSG00000003814(Calr),ENSMUSG00000004207(Psap),ENSMUSG00…	ENSMUSG00000000120(Ngfr),ENSMUSG00000000567(Sox9),ENSMUSG00000000869(Il4),ENSMUSG00000001583(Tnk1),ENSMUSG00000001672(Marveld3),ENSMUSG00000002007(Srpk3),ENSMUSG00000002384(Bmp8b),ENSMUSG00000002985(Apoe),ENSMUSG00000003411(Rab3b),ENSMUSG00000003882(Il7r),ENSMUSG00000004035(Gstm7),ENSMUSG00000004085(Map3k20),ENSMUSG00000004558(Ndrg2),ENSMUSG00000004730(Adgre1),ENSMUSG00000004864(Mapk13),ENSMUSG00…
BP	GO:0048523	negative regulation of cellular process	668	717	1385	4826	5.4e-21	7.8787e-19	ENSMUSG00000000001(Gnai3),ENSMUSG00000000028(Cdc45),ENSMUSG00000000555(Itga5),ENSMUSG00000000628(Hk2),ENSMUSG00000000706(Btn1a1),ENSMUSG00000000708(Kat2b),ENSMUSG00000000817(Fasl),ENSMUSG00000000983(Wfdc18),ENSMUSG00000001098(Kctd10),ENSMUSG00000001131(Timp1),ENSMUSG00000001156(Mxd1),ENSMUSG00000001227(Sema6b),ENSMUSG00000001467(Cyp51),ENSMUSG00000001504(Irx2),ENSMUSG00000001507(Itga3),ENSMUSG000…	ENSMUSG00000000085(Scmh1),ENSMUSG00000000120(Ngfr),ENSMUSG00000000126(Wnt9a),ENSMUSG00000000142(Axin2),ENSMUSG00000000184(Ccnd2),ENSMUSG00000000303(Cdh1),ENSMUSG00000000308(Ckmt1),ENSMUSG00000000320(Alox12),ENSMUSG00000000392(Fap),ENSMUSG00000000567(Sox9),ENSMUSG00000000627(Sema4f),ENSMUSG00000000730(Dnmt3l),ENSMUSG00000000753(Serpinf1),ENSMUSG00000000782(Tcf7),ENSMUSG00000000861(Bcl11a),ENSMUSG0…
BP	GO:0048585	negative regulation of response to stimulus	258	260	518	1538	9.1e-21	1.31596e-18	ENSMUSG00000000001(Gnai3),ENSMUSG00000001098(Kctd10),ENSMUSG00000001227(Sema6b),ENSMUSG00000001507(Itga3),ENSMUSG00000001517(Foxm1),ENSMUSG00000002250(Ppard),ENSMUSG00000002603(Tgfb1),ENSMUSG00000003032(Klf4),ENSMUSG00000003814(Calr),ENSMUSG00000004207(Psap),ENSMUSG00000004951(Hspb1),ENSMUSG00000005161(Prdx2),ENSMUSG00000005413(Hmox1),ENSMUSG00000006205(Htra1),ENSMUSG00000006457(Actn3),ENSMUSG000…	ENSMUSG00000000120(Ngfr),ENSMUSG00000000142(Axin2),ENSMUSG00000000320(Alox12),ENSMUSG00000000567(Sox9),ENSMUSG00000000627(Sema4f),ENSMUSG00000000753(Serpinf1),ENSMUSG00000000869(Il4),ENSMUSG00000000957(Mmp14),ENSMUSG00000001494(Sost),ENSMUSG00000001583(Tnk1),ENSMUSG00000001672(Marveld3),ENSMUSG00000001870(Ltbp1),ENSMUSG00000002032(Tmem25),ENSMUSG00000002459(Rgs20),ENSMUSG00000002985(Apoe),ENSMUSG…
MF	GO:0022836	gated channel activity	50	102	152	320	1e-20	1.43342e-18	ENSMUSG00000000216(Scnn1g),ENSMUSG00000000560(Gabra2),ENSMUSG00000001260(Gabrg1),ENSMUSG00000004113(Cacna1b),ENSMUSG00000006216(Clcnkb),ENSMUSG00000018470(Kcnab3),ENSMUSG00000018770(Atp5g3),ENSMUSG00000020722(Cacng1),ENSMUSG00000021313(Ryr2),ENSMUSG00000021730(Hcn1),ENSMUSG00000023033(Scn8a),ENSMUSG00000023959(Clic5),ENSMUSG00000027273(Snap25),ENSMUSG00000028931(Kcnab2),ENSMUSG00000030428(Ttyh1),…	ENSMUSG00000000794(Kcnn3),ENSMUSG00000001985(Grik3),ENSMUSG00000002908(Kcnn1),ENSMUSG00000003352(Cacnb3),ENSMUSG00000003378(Grik5),ENSMUSG00000004110(Cacna1e),ENSMUSG00000007653(Gabrb2),ENSMUSG00000009246(Trpm5),ENSMUSG00000011008(Mcoln2),ENSMUSG00000015340(Cybb),ENSMUSG00000015968(Cacna1d),ENSMUSG00000017412(Cacnb4),ENSMUSG00000018340(Anxa6),ENSMUSG00000020155(Kcnmb1),ENSMUSG00000020159(Gabrp),E…
BP	GO:0003013	circulatory system process	100	106	206	485	1.4e-20	1.98934e-18	ENSMUSG00000000708(Kat2b),ENSMUSG00000002250(Ppard),ENSMUSG00000002603(Tgfb1),ENSMUSG00000002944(Cd36),ENSMUSG00000004113(Cacna1b),ENSMUSG00000005220(Corin),ENSMUSG00000005413(Hmox1),ENSMUSG00000017697(Ada),ENSMUSG00000018500(Adora2b),ENSMUSG00000018932(Map2k3),ENSMUSG00000019997(Ccn2),ENSMUSG00000020184(Mdm2),ENSMUSG00000020572(Nampt),ENSMUSG00000021194(Chga),ENSMUSG00000021313(Ryr2),ENSMUSG0000…	ENSMUSG00000000320(Alox12),ENSMUSG00000000889(Dbh),ENSMUSG00000001865(Cpa3),ENSMUSG00000002985(Apoe),ENSMUSG00000003484(Cyp4f18),ENSMUSG00000005611(Mrvi1),ENSMUSG00000006576(Slc4a3),ENSMUSG00000007877(Tcap),ENSMUSG00000011751(Sptbn4),ENSMUSG00000015968(Cacna1d),ENSMUSG00000019326(Aoc3),ENSMUSG00000019787(Trdn),ENSMUSG00000019789(Hey2),ENSMUSG00000020123(Avpr1a),ENSMUSG00000020155(Kcnmb1),ENSMUSG0…
BP	GO:0120036	plasma membrane bounded cell projection organization	194	307	501	1481	1.6e-20	2.25393e-18	ENSMUSG00000000305(Cdh4),ENSMUSG00000000708(Kat2b),ENSMUSG00000001227(Sema6b),ENSMUSG00000001507(Itga3),ENSMUSG00000001627(Ifrd1),ENSMUSG00000001864(Aif1l),ENSMUSG00000003032(Klf4),ENSMUSG00000004151(Etv1),ENSMUSG00000004885(Crabp2),ENSMUSG00000004951(Hspb1),ENSMUSG00000005148(Klf5),ENSMUSG00000005672(Kit),ENSMUSG00000006304(Arpc2),ENSMUSG00000008475(Arpc5),ENSMUSG00000012819(Cdh23),ENSMUSG000000…	ENSMUSG00000000120(Ngfr),ENSMUSG00000000303(Cdh1),ENSMUSG00000000627(Sema4f),ENSMUSG00000000753(Serpinf1),ENSMUSG00000000861(Bcl11a),ENSMUSG00000002985(Apoe),ENSMUSG00000003354(Ccdc65),ENSMUSG00000003934(Efnb3),ENSMUSG00000005087(Cd44),ENSMUSG00000005958(Ephb3),ENSMUSG00000006476(Nsmf),ENSMUSG00000006586(Runx1t1),ENSMUSG00000006930(Hap1),ENSMUSG00000007989(Fzd3),ENSMUSG00000008575(Nfib),ENSMUSG00…
BP	GO:0098662	inorganic cation transmembrane transport	121	161	282	729	1.9e-20	2.65367e-18	ENSMUSG00000000088(Cox5a),ENSMUSG00000000216(Scnn1g),ENSMUSG00000000817(Fasl),ENSMUSG00000002603(Tgfb1),ENSMUSG00000004113(Cacna1b),ENSMUSG00000006273(Atp6v1b2),ENSMUSG00000006567(Atp7b),ENSMUSG00000009687(Fxyd5),ENSMUSG00000014077(Chp1),ENSMUSG00000015575(Atp6v0e),ENSMUSG00000017400(Stac2),ENSMUSG00000018470(Kcnab3),ENSMUSG00000018585(Atox1),ENSMUSG00000018770(Atp5g3),ENSMUSG00000019210(Atp6v1e1…	ENSMUSG00000000794(Kcnn3),ENSMUSG00000001249(Hpn),ENSMUSG00000002908(Kcnn1),ENSMUSG00000003352(Cacnb3),ENSMUSG00000004035(Gstm7),ENSMUSG00000004110(Cacna1e),ENSMUSG00000004988(Fxyd4),ENSMUSG00000005360(Slc1a3),ENSMUSG00000006930(Hap1),ENSMUSG00000007107(Atp1a4),ENSMUSG00000007122(Casq1),ENSMUSG00000009246(Trpm5),ENSMUSG00000011008(Mcoln2),ENSMUSG00000015968(Cacna1d),ENSMUSG00000017412(Cacnb4),ENS…
BP	GO:0051270	regulation of cellular component movement	188	185	373	1035	2e-20	2.76966e-18	ENSMUSG00000000555(Itga5),ENSMUSG00000001131(Timp1),ENSMUSG00000001227(Sema6b),ENSMUSG00000001507(Itga3),ENSMUSG00000002233(Rhoc),ENSMUSG00000002250(Ppard),ENSMUSG00000002603(Tgfb1),ENSMUSG00000003032(Klf4),ENSMUSG00000003665(Has1),ENSMUSG00000003814(Calr),ENSMUSG00000004791(Pgf),ENSMUSG00000004951(Hspb1),ENSMUSG00000005413(Hmox1),ENSMUSG00000005672(Kit),ENSMUSG00000006304(Arpc2),ENSMUSG000000069…	ENSMUSG00000000303(Cdh1),ENSMUSG00000000320(Alox12),ENSMUSG00000000567(Sox9),ENSMUSG00000000627(Sema4f),ENSMUSG00000000731(Aire),ENSMUSG00000000753(Serpinf1),ENSMUSG00000000869(Il4),ENSMUSG00000000957(Mmp14),ENSMUSG00000001435(Col18a1),ENSMUSG00000001672(Marveld3),ENSMUSG00000002985(Apoe),ENSMUSG00000003354(Ccdc65),ENSMUSG00000005533(Igf1r),ENSMUSG00000005824(Tnfsf14),ENSMUSG00000006476(Nsmf),ENS…
BP	GO:0051241	negative regulation of multicellular organismal process	211	218	429	1231	3e-20	4.11958e-18	ENSMUSG00000000706(Btn1a1),ENSMUSG00000000817(Fasl),ENSMUSG00000001131(Timp1),ENSMUSG00000001227(Sema6b),ENSMUSG00000001467(Cyp51),ENSMUSG00000001627(Ifrd1),ENSMUSG00000002250(Ppard),ENSMUSG00000002603(Tgfb1),ENSMUSG00000002944(Cd36),ENSMUSG00000003032(Klf4),ENSMUSG00000003814(Calr),ENSMUSG00000004460(Dnajb11),ENSMUSG00000005148(Klf5),ENSMUSG00000005161(Prdx2),ENSMUSG00000005413(Hmox1),ENSMUSG000…	ENSMUSG00000000120(Ngfr),ENSMUSG00000000126(Wnt9a),ENSMUSG00000000142(Axin2),ENSMUSG00000000320(Alox12),ENSMUSG00000000567(Sox9),ENSMUSG00000000627(Sema4f),ENSMUSG00000000753(Serpinf1),ENSMUSG00000000861(Bcl11a),ENSMUSG00000000869(Il4),ENSMUSG00000001249(Hpn),ENSMUSG00000001494(Sost),ENSMUSG00000001672(Marveld3),ENSMUSG00000002985(Apoe),ENSMUSG00000003352(Cacnb3),ENSMUSG00000003934(Efnb3),ENSMUSG…
BP	GO:0050767	regulation of neurogenesis	125	210	335	908	3.2e-20	4.3576e-18	ENSMUSG00000000305(Cdh4),ENSMUSG00000000708(Kat2b),ENSMUSG00000001227(Sema6b),ENSMUSG00000001507(Itga3),ENSMUSG00000001627(Ifrd1),ENSMUSG00000002603(Tgfb1),ENSMUSG00000003032(Klf4),ENSMUSG00000003814(Calr),ENSMUSG00000004031(Brinp2),ENSMUSG00000004460(Dnajb11),ENSMUSG00000004885(Crabp2),ENSMUSG00000004951(Hspb1),ENSMUSG00000005672(Kit),ENSMUSG00000015619(Gata3),ENSMUSG00000015812(Gnrh1),ENSMUSG00…	ENSMUSG00000000120(Ngfr),ENSMUSG00000000567(Sox9),ENSMUSG00000000627(Sema4f),ENSMUSG00000000753(Serpinf1),ENSMUSG00000000861(Bcl11a),ENSMUSG00000002985(Apoe),ENSMUSG00000003282(Plag1),ENSMUSG00000003934(Efnb3),ENSMUSG00000003948(Mmd),ENSMUSG00000005958(Ephb3),ENSMUSG00000006476(Nsmf),ENSMUSG00000006586(Runx1t1),ENSMUSG00000006930(Hap1),ENSMUSG00000007989(Fzd3),ENSMUSG00000008999(Bmp7),ENSMUSG0000…
BP	GO:0030030	cell projection organization	200	308	508	1517	8.4e-20	1.13442e-17	ENSMUSG00000000305(Cdh4),ENSMUSG00000000708(Kat2b),ENSMUSG00000001227(Sema6b),ENSMUSG00000001507(Itga3),ENSMUSG00000001627(Ifrd1),ENSMUSG00000001864(Aif1l),ENSMUSG00000003032(Klf4),ENSMUSG00000004151(Etv1),ENSMUSG00000004885(Crabp2),ENSMUSG00000004951(Hspb1),ENSMUSG00000005148(Klf5),ENSMUSG00000005672(Kit),ENSMUSG00000006304(Arpc2),ENSMUSG00000008475(Arpc5),ENSMUSG00000012819(Cdh23),ENSMUSG000000…	ENSMUSG00000000120(Ngfr),ENSMUSG00000000303(Cdh1),ENSMUSG00000000627(Sema4f),ENSMUSG00000000753(Serpinf1),ENSMUSG00000000861(Bcl11a),ENSMUSG00000002985(Apoe),ENSMUSG00000003354(Ccdc65),ENSMUSG00000003934(Efnb3),ENSMUSG00000005087(Cd44),ENSMUSG00000005958(Ephb3),ENSMUSG00000006476(Nsmf),ENSMUSG00000006586(Runx1t1),ENSMUSG00000006930(Hap1),ENSMUSG00000007989(Fzd3),ENSMUSG00000008575(Nfib),ENSMUSG00…
CC	GO:0043025	neuronal cell body	107	165	272	702	1.2e-19	1.60731e-17	ENSMUSG00000000560(Gabra2),ENSMUSG00000001023(S100a5),ENSMUSG00000002603(Tgfb1),ENSMUSG00000003153(Slc2a3),ENSMUSG00000004031(Brinp2),ENSMUSG00000004113(Cacna1b),ENSMUSG00000004951(Hspb1),ENSMUSG00000006304(Arpc2),ENSMUSG00000010095(Slc3a2),ENSMUSG00000013629(Cad),ENSMUSG00000015812(Gnrh1),ENSMUSG00000017697(Ada),ENSMUSG00000019874(Fabp7),ENSMUSG00000019890(Nts),ENSMUSG00000020182(Ddc),ENSMUSG000…	ENSMUSG00000000120(Ngfr),ENSMUSG00000000308(Ckmt1),ENSMUSG00000000627(Sema4f),ENSMUSG00000000753(Serpinf1),ENSMUSG00000000794(Kcnn3),ENSMUSG00000000881(Dlg3),ENSMUSG00000000889(Dbh),ENSMUSG00000001249(Hpn),ENSMUSG00000001270(Ckb),ENSMUSG00000001870(Ltbp1),ENSMUSG00000001985(Grik3),ENSMUSG00000002908(Kcnn1),ENSMUSG00000002985(Apoe),ENSMUSG00000003378(Grik5),ENSMUSG00000004347(Pde1c),ENSMUSG0000000…
MF	GO:0043167	ion binding	753	943	1696	6069	1.4e-19	1.85995e-17	ENSMUSG00000000001(Gnai3),ENSMUSG00000000088(Cox5a),ENSMUSG00000000305(Cdh4),ENSMUSG00000000420(Galnt1),ENSMUSG00000000555(Itga5),ENSMUSG00000000628(Hk2),ENSMUSG00000000805(Car4),ENSMUSG00000001020(S100a4),ENSMUSG00000001021(S100a3),ENSMUSG00000001023(S100a5),ENSMUSG00000001025(S100a6),ENSMUSG00000001131(Timp1),ENSMUSG00000001403(Ube2c),ENSMUSG00000001467(Cyp51),ENSMUSG00000001473(Tubb6),ENSMUSG0…	ENSMUSG00000000253(Gmpr),ENSMUSG00000000303(Cdh1),ENSMUSG00000000308(Ckmt1),ENSMUSG00000000320(Alox12),ENSMUSG00000000402(Egfl6),ENSMUSG00000000730(Dnmt3l),ENSMUSG00000000731(Aire),ENSMUSG00000000861(Bcl11a),ENSMUSG00000000889(Dbh),ENSMUSG00000000901(Mmp11),ENSMUSG00000000957(Mmp14),ENSMUSG00000001270(Ckb),ENSMUSG00000001435(Col18a1),ENSMUSG00000001494(Sost),ENSMUSG00000001508(Sgca),ENSMUSG000000…
BP	GO:0010033	response to organic substance	494	483	977	3270	1.6e-19	2.07505e-17	ENSMUSG00000000628(Hk2),ENSMUSG00000000708(Kat2b),ENSMUSG00000000791(Il12rb1),ENSMUSG00000000792(Slc5a5),ENSMUSG00000000817(Fasl),ENSMUSG00000001131(Timp1),ENSMUSG00000001507(Itga3),ENSMUSG00000001642(Akr1b3),ENSMUSG00000002015(Bcap31),ENSMUSG00000002250(Ppard),ENSMUSG00000002603(Tgfb1),ENSMUSG00000002944(Cd36),ENSMUSG00000003032(Klf4),ENSMUSG00000003665(Has1),ENSMUSG00000003814(Calr),ENSMUSG0000…	ENSMUSG00000000120(Ngfr),ENSMUSG00000000303(Cdh1),ENSMUSG00000000320(Alox12),ENSMUSG00000000567(Sox9),ENSMUSG00000000753(Serpinf1),ENSMUSG00000000782(Tcf7),ENSMUSG00000000861(Bcl11a),ENSMUSG00000000889(Dbh),ENSMUSG00000000957(Mmp14),ENSMUSG00000001119(Col6a1),ENSMUSG00000001249(Hpn),ENSMUSG00000001494(Sost),ENSMUSG00000001663(Gstt1),ENSMUSG00000001870(Ltbp1),ENSMUSG00000002384(Bmp8b),ENSMUSG00000…
BP	GO:0051050	positive regulation of transport	190	189	379	1067	1.6e-19	2.07505e-17	ENSMUSG00000002015(Bcap31),ENSMUSG00000002250(Ppard),ENSMUSG00000002603(Tgfb1),ENSMUSG00000002944(Cd36),ENSMUSG00000003200(Sh3gl1),ENSMUSG00000003814(Calr),ENSMUSG00000004113(Cacna1b),ENSMUSG00000004709(Cd244a),ENSMUSG00000005891(Prl4a1),ENSMUSG00000005892(Trh),ENSMUSG00000006304(Arpc2),ENSMUSG00000006488(Prl7a1),ENSMUSG00000006490(Prl8a9),ENSMUSG00000007659(Bcl2l1),ENSMUSG00000010064(Slc38a3),EN…	ENSMUSG00000000303(Cdh1),ENSMUSG00000000869(Il4),ENSMUSG00000001741(Il16),ENSMUSG00000002985(Apoe),ENSMUSG00000003352(Cacnb3),ENSMUSG00000003411(Rab3b),ENSMUSG00000003452(Bicd1),ENSMUSG00000003484(Cyp4f18),ENSMUSG00000004035(Gstm7),ENSMUSG00000005089(Slc1a2),ENSMUSG00000006930(Hap1),ENSMUSG00000007122(Casq1),ENSMUSG00000013921(Clip3),ENSMUSG00000014453(Blk),ENSMUSG00000015222(Map2),ENSMUSG0000001…
CC	GO:0044297	cell body	109	189	298	789	1.6e-19	2.07505e-17	ENSMUSG00000000560(Gabra2),ENSMUSG00000001023(S100a5),ENSMUSG00000002603(Tgfb1),ENSMUSG00000003153(Slc2a3),ENSMUSG00000004031(Brinp2),ENSMUSG00000004113(Cacna1b),ENSMUSG00000004951(Hspb1),ENSMUSG00000006304(Arpc2),ENSMUSG00000010095(Slc3a2),ENSMUSG00000013629(Cad),ENSMUSG00000015812(Gnrh1),ENSMUSG00000017697(Ada),ENSMUSG00000019874(Fabp7),ENSMUSG00000019890(Nts),ENSMUSG00000020182(Ddc),ENSMUSG000…	ENSMUSG00000000120(Ngfr),ENSMUSG00000000308(Ckmt1),ENSMUSG00000000627(Sema4f),ENSMUSG00000000753(Serpinf1),ENSMUSG00000000794(Kcnn3),ENSMUSG00000000881(Dlg3),ENSMUSG00000000889(Dbh),ENSMUSG00000001249(Hpn),ENSMUSG00000001270(Ckb),ENSMUSG00000001870(Ltbp1),ENSMUSG00000001985(Grik3),ENSMUSG00000002908(Kcnn1),ENSMUSG00000002985(Apoe),ENSMUSG00000003378(Grik5),ENSMUSG00000004347(Pde1c),ENSMUSG0000000…
BP	GO:0048878	chemical homeostasis	196	222	418	1203	1.8e-19	2.31605e-17	ENSMUSG00000000216(Scnn1g),ENSMUSG00000000628(Hk2),ENSMUSG00000000805(Car4),ENSMUSG00000000817(Fasl),ENSMUSG00000001642(Akr1b3),ENSMUSG00000002015(Bcap31),ENSMUSG00000002204(Napsa),ENSMUSG00000002603(Tgfb1),ENSMUSG00000002944(Cd36),ENSMUSG00000003657(Calb2),ENSMUSG00000004113(Cacna1b),ENSMUSG00000005057(Sh2b2),ENSMUSG00000005220(Corin),ENSMUSG00000005413(Hmox1),ENSMUSG00000006567(Atp7b),ENSMUSG00…	ENSMUSG00000000120(Ngfr),ENSMUSG00000000320(Alox12),ENSMUSG00000000753(Serpinf1),ENSMUSG00000000889(Dbh),ENSMUSG00000001247(Lsr),ENSMUSG00000001249(Hpn),ENSMUSG00000001270(Ckb),ENSMUSG00000001420(Tmem79),ENSMUSG00000002289(Angptl4),ENSMUSG00000002985(Apoe),ENSMUSG00000003352(Cacnb3),ENSMUSG00000003378(Grik5),ENSMUSG00000004035(Gstm7),ENSMUSG00000004347(Pde1c),ENSMUSG00000006576(Slc4a3),ENSMUSG000…
CC	GO:0005783	endoplasmic reticulum	333	229	562	1714	2.9e-19	3.70226e-17	ENSMUSG00000000001(Gnai3),ENSMUSG00000000555(Itga5),ENSMUSG00000000628(Hk2),ENSMUSG00000000805(Car4),ENSMUSG00000001467(Cyp51),ENSMUSG00000002014(Ssr4),ENSMUSG00000002015(Bcap31),ENSMUSG00000002944(Cd36),ENSMUSG00000003271(Sult2b1),ENSMUSG00000003814(Calr),ENSMUSG00000004031(Brinp2),ENSMUSG00000004460(Dnajb11),ENSMUSG00000004885(Crabp2),ENSMUSG00000005413(Hmox1),ENSMUSG00000005973(Rcn1),ENSMUSG00…	ENSMUSG00000000120(Ngfr),ENSMUSG00000000627(Sema4f),ENSMUSG00000000889(Dbh),ENSMUSG00000000903(Vpreb3),ENSMUSG00000001249(Hpn),ENSMUSG00000001334(Fndc5),ENSMUSG00000002985(Apoe),ENSMUSG00000003378(Grik5),ENSMUSG00000003484(Cyp4f18),ENSMUSG00000004035(Gstm7),ENSMUSG00000005320(Fgfr4),ENSMUSG00000005611(Mrvi1),ENSMUSG00000006675(P4htm),ENSMUSG00000006930(Hap1),ENSMUSG00000007122(Casq1),ENSMUSG00000…
BP	GO:0042391	regulation of membrane potential	64	125	189	444	4.2e-19	5.32033e-17	ENSMUSG00000000560(Gabra2),ENSMUSG00000001260(Gabrg1),ENSMUSG00000002944(Cd36),ENSMUSG00000003200(Sh3gl1),ENSMUSG00000007659(Bcl2l1),ENSMUSG00000019848(Popdc3),ENSMUSG00000020598(Nrcam),ENSMUSG00000021313(Ryr2),ENSMUSG00000021486(Prelid1),ENSMUSG00000021591(Glrx),ENSMUSG00000021730(Hcn1),ENSMUSG00000022051(Bnip3l),ENSMUSG00000022790(Igsf11),ENSMUSG00000023942(Slc29a1),ENSMUSG00000024065(Ehd3),ENS…	ENSMUSG00000000120(Ngfr),ENSMUSG00000000320(Alox12),ENSMUSG00000001985(Grik3),ENSMUSG00000002032(Tmem25),ENSMUSG00000003352(Cacnb3),ENSMUSG00000003378(Grik5),ENSMUSG00000007107(Atp1a4),ENSMUSG00000007653(Gabrb2),ENSMUSG00000015968(Cacna1d),ENSMUSG00000017167(Cntnap1),ENSMUSG00000017412(Cacnb4),ENSMUSG00000019787(Trdn),ENSMUSG00000019853(Hebp2),ENSMUSG00000019929(Dcn),ENSMUSG00000020159(Gabrp),ENS…
BP	GO:0071495	cellular response to endogenous stimulus	212	217	429	1247	4.3e-19	5.4051e-17	ENSMUSG00000000708(Kat2b),ENSMUSG00000000792(Slc5a5),ENSMUSG00000001507(Itga3),ENSMUSG00000001642(Akr1b3),ENSMUSG00000002250(Ppard),ENSMUSG00000002603(Tgfb1),ENSMUSG00000002944(Cd36),ENSMUSG00000003032(Klf4),ENSMUSG00000003665(Has1),ENSMUSG00000003814(Calr),ENSMUSG00000004791(Pgf),ENSMUSG00000005057(Sh2b2),ENSMUSG00000005148(Klf5),ENSMUSG00000005268(Prlr),ENSMUSG00000005640(Insrr),ENSMUSG00000005…	ENSMUSG00000000120(Ngfr),ENSMUSG00000000303(Cdh1),ENSMUSG00000000567(Sox9),ENSMUSG00000000753(Serpinf1),ENSMUSG00000000861(Bcl11a),ENSMUSG00000001119(Col6a1),ENSMUSG00000001494(Sost),ENSMUSG00000001870(Ltbp1),ENSMUSG00000002384(Bmp8b),ENSMUSG00000004035(Gstm7),ENSMUSG00000004231(Pax2),ENSMUSG00000004864(Mapk13),ENSMUSG00000005087(Cd44),ENSMUSG00000005320(Fgfr4),ENSMUSG00000005533(Igf1r),ENSMUSG00…
CC	GO:0098984	neuron to neuron synapse	53	122	175	400	4.6e-19	5.73806e-17	ENSMUSG00000003200(Sh3gl1),ENSMUSG00000004951(Hspb1),ENSMUSG00000015766(Eps8),ENSMUSG00000020315(Sptbn1),ENSMUSG00000020598(Nrcam),ENSMUSG00000021782(Dlg5),ENSMUSG00000022296(Baalc),ENSMUSG00000022494(Shisa9),ENSMUSG00000022602(Arc),ENSMUSG00000022790(Igsf11),ENSMUSG00000024873(Cnih2),ENSMUSG00000025026(Add3),ENSMUSG00000025085(Ablim1),ENSMUSG00000025161(Slc16a3),ENSMUSG00000025475(Adgra1),ENSMUS…	ENSMUSG00000000120(Ngfr),ENSMUSG00000000627(Sema4f),ENSMUSG00000000861(Bcl11a),ENSMUSG00000000881(Dlg3),ENSMUSG00000001985(Grik3),ENSMUSG00000003279(Dlgap1),ENSMUSG00000003378(Grik5),ENSMUSG00000003872(Lin7b),ENSMUSG00000003934(Efnb3),ENSMUSG00000006476(Nsmf),ENSMUSG00000009394(Syn2),ENSMUSG00000010086(Rnf112),ENSMUSG00000013236(Ptprs),ENSMUSG00000013523(Bcas1),ENSMUSG00000015222(Map2),ENSMUSG000…
CC	GO:0014069	postsynaptic density	51	120	171	389	6.6e-19	8.1705e-17	ENSMUSG00000003200(Sh3gl1),ENSMUSG00000004951(Hspb1),ENSMUSG00000015766(Eps8),ENSMUSG00000020315(Sptbn1),ENSMUSG00000020598(Nrcam),ENSMUSG00000021782(Dlg5),ENSMUSG00000022296(Baalc),ENSMUSG00000022494(Shisa9),ENSMUSG00000022602(Arc),ENSMUSG00000022790(Igsf11),ENSMUSG00000024873(Cnih2),ENSMUSG00000025026(Add3),ENSMUSG00000025085(Ablim1),ENSMUSG00000025161(Slc16a3),ENSMUSG00000025475(Adgra1),ENSMUS…	ENSMUSG00000000120(Ngfr),ENSMUSG00000000627(Sema4f),ENSMUSG00000000861(Bcl11a),ENSMUSG00000000881(Dlg3),ENSMUSG00000001985(Grik3),ENSMUSG00000003279(Dlgap1),ENSMUSG00000003378(Grik5),ENSMUSG00000003872(Lin7b),ENSMUSG00000003934(Efnb3),ENSMUSG00000006476(Nsmf),ENSMUSG00000009394(Syn2),ENSMUSG00000010086(Rnf112),ENSMUSG00000013236(Ptprs),ENSMUSG00000013523(Bcas1),ENSMUSG00000015222(Map2),ENSMUSG000…
MF	GO:0050839	cell adhesion molecule binding	58	60	118	235	9.5e-19	1.16721e-16	ENSMUSG00000000305(Cdh4),ENSMUSG00000000325(Arvcf),ENSMUSG00000000555(Itga5),ENSMUSG00000001029(Icam2),ENSMUSG00000001507(Itga3),ENSMUSG00000003814(Calr),ENSMUSG00000005125(Ndrg1),ENSMUSG00000009687(Fxyd5),ENSMUSG00000012819(Cdh23),ENSMUSG00000015533(Itga2),ENSMUSG00000015647(Lama5),ENSMUSG00000019997(Ccn2),ENSMUSG00000020689(Itgb3),ENSMUSG00000020712(Tcam1),ENSMUSG00000021702(Thbs4),ENSMUSG00000…	ENSMUSG00000000157(Itgb2l),ENSMUSG00000000303(Cdh1),ENSMUSG00000000392(Fap),ENSMUSG00000000402(Egfl6),ENSMUSG00000000957(Mmp14),ENSMUSG00000006411(Nectin4),ENSMUSG00000016150(Tenm1),ENSMUSG00000016493(Cd46),ENSMUSG00000017344(Vtn),ENSMUSG00000018569(Cldn7),ENSMUSG00000020758(Itgb4),ENSMUSG00000020932(Gfap),ENSMUSG00000021057(Akap5),ENSMUSG00000022026(Olfm4),ENSMUSG00000022505(Emp2),ENSMUSG0000002…
BP	GO:0030155	regulation of cell adhesion	135	138	273	717	9.6e-19	1.1707e-16	ENSMUSG00000000555(Itga5),ENSMUSG00000000706(Btn1a1),ENSMUSG00000000791(Il12rb1),ENSMUSG00000001507(Itga3),ENSMUSG00000002603(Tgfb1),ENSMUSG00000002944(Cd36),ENSMUSG00000003032(Klf4),ENSMUSG00000003814(Calr),ENSMUSG00000004709(Cd244a),ENSMUSG00000005161(Prdx2),ENSMUSG00000005268(Prlr),ENSMUSG00000006304(Arpc2),ENSMUSG00000006574(Slc4a1),ENSMUSG00000006958(Chrd),ENSMUSG00000007817(Zmiz1),ENSMUSG00…	ENSMUSG00000000303(Cdh1),ENSMUSG00000000320(Alox12),ENSMUSG00000000402(Egfl6),ENSMUSG00000000567(Sox9),ENSMUSG00000000732(Icosl),ENSMUSG00000000782(Tcf7),ENSMUSG00000000869(Il4),ENSMUSG00000000957(Mmp14),ENSMUSG00000003882(Il7r),ENSMUSG00000003934(Efnb3),ENSMUSG00000005087(Cd44),ENSMUSG00000005824(Tnfsf14),ENSMUSG00000005958(Ephb3),ENSMUSG00000006538(Ihh),ENSMUSG00000008461(Fut1),ENSMUSG000000089…
BP	GO:0015672	monovalent inorganic cation transport	97	114	211	516	9.9e-19	1.18953e-16	ENSMUSG00000000088(Cox5a),ENSMUSG00000000216(Scnn1g),ENSMUSG00000001095(Slc13a2),ENSMUSG00000002603(Tgfb1),ENSMUSG00000006273(Atp6v1b2),ENSMUSG00000006641(Slc5a6),ENSMUSG00000009687(Fxyd5),ENSMUSG00000010064(Slc38a3),ENSMUSG00000014077(Chp1),ENSMUSG00000015575(Atp6v0e),ENSMUSG00000018470(Kcnab3),ENSMUSG00000018770(Atp5g3),ENSMUSG00000018900(Slc22a5),ENSMUSG00000019210(Atp6v1e1),ENSMUSG00000019558…	ENSMUSG00000000794(Kcnn3),ENSMUSG00000000869(Il4),ENSMUSG00000001249(Hpn),ENSMUSG00000002908(Kcnn1),ENSMUSG00000004988(Fxyd4),ENSMUSG00000005360(Slc1a3),ENSMUSG00000007107(Atp1a4),ENSMUSG00000009246(Trpm5),ENSMUSG00000011751(Sptbn4),ENSMUSG00000015968(Cacna1d),ENSMUSG00000019699(Akt3),ENSMUSG00000019894(Slc6a15),ENSMUSG00000020155(Kcnmb1),ENSMUSG00000020264(Slc36a2),ENSMUSG00000020788(Atp2a3),ENS…
BP	GO:0048514	blood vessel morphogenesis	140	100	240	609	9.9e-19	1.18953e-16	ENSMUSG00000000555(Itga5),ENSMUSG00000000628(Hk2),ENSMUSG00000000817(Fasl),ENSMUSG00000001098(Kctd10),ENSMUSG00000002603(Tgfb1),ENSMUSG00000002944(Cd36),ENSMUSG00000003032(Klf4),ENSMUSG00000004328(Hif3a),ENSMUSG00000004791(Pgf),ENSMUSG00000004951(Hspb1),ENSMUSG00000005148(Klf5),ENSMUSG00000005413(Hmox1),ENSMUSG00000007817(Zmiz1),ENSMUSG00000013076(Amotl1),ENSMUSG00000015468(Notch4),ENSMUSG0000001…	ENSMUSG00000000120(Ngfr),ENSMUSG00000000392(Fap),ENSMUSG00000000753(Serpinf1),ENSMUSG00000000957(Mmp14),ENSMUSG00000001435(Col18a1),ENSMUSG00000002289(Angptl4),ENSMUSG00000002985(Apoe),ENSMUSG00000005836(Gata6),ENSMUSG00000005958(Ephb3),ENSMUSG00000006538(Ihh),ENSMUSG00000008461(Fut1),ENSMUSG00000008855(Hdac5),ENSMUSG00000015340(Cybb),ENSMUSG00000015957(Wnt11),ENSMUSG00000016128(Stard13),ENSMUSG0…
BP	GO:0001568	blood vessel development	155	114	269	704	1e-18	1.19277e-16	ENSMUSG00000000555(Itga5),ENSMUSG00000000628(Hk2),ENSMUSG00000000817(Fasl),ENSMUSG00000001098(Kctd10),ENSMUSG00000001510(Dlx3),ENSMUSG00000002603(Tgfb1),ENSMUSG00000002944(Cd36),ENSMUSG00000003032(Klf4),ENSMUSG00000004328(Hif3a),ENSMUSG00000004791(Pgf),ENSMUSG00000004951(Hspb1),ENSMUSG00000005148(Klf5),ENSMUSG00000005413(Hmox1),ENSMUSG00000007817(Zmiz1),ENSMUSG00000013076(Amotl1),ENSMUSG000000154…	ENSMUSG00000000120(Ngfr),ENSMUSG00000000392(Fap),ENSMUSG00000000753(Serpinf1),ENSMUSG00000000957(Mmp14),ENSMUSG00000001435(Col18a1),ENSMUSG00000001870(Ltbp1),ENSMUSG00000002289(Angptl4),ENSMUSG00000002985(Apoe),ENSMUSG00000005836(Gata6),ENSMUSG00000005958(Ephb3),ENSMUSG00000006538(Ihh),ENSMUSG00000008461(Fut1),ENSMUSG00000008855(Hdac5),ENSMUSG00000008999(Bmp7),ENSMUSG00000010797(Wnt2),ENSMUSG0000…
BP	GO:0030334	regulation of cell migration	173	153	326	896	1.2e-18	1.41073e-16	ENSMUSG00000000555(Itga5),ENSMUSG00000001131(Timp1),ENSMUSG00000001227(Sema6b),ENSMUSG00000001507(Itga3),ENSMUSG00000002233(Rhoc),ENSMUSG00000002250(Ppard),ENSMUSG00000002603(Tgfb1),ENSMUSG00000003032(Klf4),ENSMUSG00000003665(Has1),ENSMUSG00000003814(Calr),ENSMUSG00000004791(Pgf),ENSMUSG00000004951(Hspb1),ENSMUSG00000005413(Hmox1),ENSMUSG00000005672(Kit),ENSMUSG00000006304(Arpc2),ENSMUSG000000069…	ENSMUSG00000000303(Cdh1),ENSMUSG00000000320(Alox12),ENSMUSG00000000567(Sox9),ENSMUSG00000000627(Sema4f),ENSMUSG00000000731(Aire),ENSMUSG00000000753(Serpinf1),ENSMUSG00000000869(Il4),ENSMUSG00000000957(Mmp14),ENSMUSG00000001435(Col18a1),ENSMUSG00000001672(Marveld3),ENSMUSG00000002985(Apoe),ENSMUSG00000005533(Igf1r),ENSMUSG00000005824(Tnfsf14),ENSMUSG00000006476(Nsmf),ENSMUSG00000007805(Twist2),ENS…
CC	GO:0032279	asymmetric synapse	51	121	172	394	1.2e-18	1.41073e-16	ENSMUSG00000003200(Sh3gl1),ENSMUSG00000004951(Hspb1),ENSMUSG00000015766(Eps8),ENSMUSG00000020315(Sptbn1),ENSMUSG00000020598(Nrcam),ENSMUSG00000021782(Dlg5),ENSMUSG00000022296(Baalc),ENSMUSG00000022494(Shisa9),ENSMUSG00000022602(Arc),ENSMUSG00000022790(Igsf11),ENSMUSG00000024873(Cnih2),ENSMUSG00000025026(Add3),ENSMUSG00000025085(Ablim1),ENSMUSG00000025161(Slc16a3),ENSMUSG00000025475(Adgra1),ENSMUS…	ENSMUSG00000000120(Ngfr),ENSMUSG00000000627(Sema4f),ENSMUSG00000000861(Bcl11a),ENSMUSG00000000881(Dlg3),ENSMUSG00000001985(Grik3),ENSMUSG00000003279(Dlgap1),ENSMUSG00000003378(Grik5),ENSMUSG00000003872(Lin7b),ENSMUSG00000003934(Efnb3),ENSMUSG00000006476(Nsmf),ENSMUSG00000009394(Syn2),ENSMUSG00000010086(Rnf112),ENSMUSG00000013236(Ptprs),ENSMUSG00000013523(Bcas1),ENSMUSG00000015222(Map2),ENSMUSG000…
MF	GO:0005261	cation channel activity	44	98	142	304	1.3e-18	1.51738e-16	ENSMUSG00000000216(Scnn1g),ENSMUSG00000004113(Cacna1b),ENSMUSG00000018470(Kcnab3),ENSMUSG00000020722(Cacng1),ENSMUSG00000021313(Ryr2),ENSMUSG00000021730(Hcn1),ENSMUSG00000023033(Scn8a),ENSMUSG00000027273(Snap25),ENSMUSG00000028420(Tmem38b),ENSMUSG00000028931(Kcnab2),ENSMUSG00000030082(Sec61a1),ENSMUSG00000030987(Stim1),ENSMUSG00000031075(Ano1),ENSMUSG00000032231(Anxa2),ENSMUSG00000032338(Hcn4),EN…	ENSMUSG00000000794(Kcnn3),ENSMUSG00000001985(Grik3),ENSMUSG00000002908(Kcnn1),ENSMUSG00000003352(Cacnb3),ENSMUSG00000003378(Grik5),ENSMUSG00000004110(Cacna1e),ENSMUSG00000004988(Fxyd4),ENSMUSG00000009246(Trpm5),ENSMUSG00000011008(Mcoln2),ENSMUSG00000015968(Cacna1d),ENSMUSG00000017412(Cacnb4),ENSMUSG00000018340(Anxa6),ENSMUSG00000020155(Kcnmb1),ENSMUSG00000020524(Gria1),ENSMUSG00000020787(P2rx1),E…
BP	GO:0000902	cell morphogenesis	146	221	367	1038	1.5e-18	1.72616e-16	ENSMUSG00000000305(Cdh4),ENSMUSG00000001227(Sema6b),ENSMUSG00000001627(Ifrd1),ENSMUSG00000002233(Rhoc),ENSMUSG00000003814(Calr),ENSMUSG00000004151(Etv1),ENSMUSG00000004885(Crabp2),ENSMUSG00000005672(Kit),ENSMUSG00000006304(Arpc2),ENSMUSG00000012819(Cdh23),ENSMUSG00000015468(Notch4),ENSMUSG00000015619(Gata3),ENSMUSG00000015647(Lama5),ENSMUSG00000015745(Plekho1),ENSMUSG00000015766(Eps8),ENSMUSG0000…	ENSMUSG00000000120(Ngfr),ENSMUSG00000000627(Sema4f),ENSMUSG00000000861(Bcl11a),ENSMUSG00000001119(Col6a1),ENSMUSG00000001249(Hpn),ENSMUSG00000001435(Col18a1),ENSMUSG00000002985(Apoe),ENSMUSG00000003882(Il7r),ENSMUSG00000003934(Efnb3),ENSMUSG00000005087(Cd44),ENSMUSG00000005360(Slc1a3),ENSMUSG00000005958(Ephb3),ENSMUSG00000006219(Fblim1),ENSMUSG00000006476(Nsmf),ENSMUSG00000006538(Ihh),ENSMUSG0000…
BP	GO:0045664	regulation of neuron differentiation	106	173	279	739	1.5e-18	1.72616e-16	ENSMUSG00000000305(Cdh4),ENSMUSG00000000708(Kat2b),ENSMUSG00000001227(Sema6b),ENSMUSG00000001507(Itga3),ENSMUSG00000001627(Ifrd1),ENSMUSG00000003032(Klf4),ENSMUSG00000003814(Calr),ENSMUSG00000004031(Brinp2),ENSMUSG00000004885(Crabp2),ENSMUSG00000004951(Hspb1),ENSMUSG00000015619(Gata3),ENSMUSG00000017491(Rarb),ENSMUSG00000019970(Sgk1),ENSMUSG00000020184(Mdm2),ENSMUSG00000020393(Kremen1),ENSMUSG000…	ENSMUSG00000000120(Ngfr),ENSMUSG00000000567(Sox9),ENSMUSG00000000627(Sema4f),ENSMUSG00000000753(Serpinf1),ENSMUSG00000000861(Bcl11a),ENSMUSG00000002985(Apoe),ENSMUSG00000003934(Efnb3),ENSMUSG00000003948(Mmd),ENSMUSG00000005958(Ephb3),ENSMUSG00000006476(Nsmf),ENSMUSG00000006586(Runx1t1),ENSMUSG00000006930(Hap1),ENSMUSG00000008999(Bmp7),ENSMUSG00000010086(Rnf112),ENSMUSG00000013089(Etv5),ENSMUSG000…
BP	GO:0048729	tissue morphogenesis	97	150	247	634	1.7e-18	1.94264e-16	ENSMUSG00000000216(Scnn1g),ENSMUSG00000000555(Itga5),ENSMUSG00000001504(Irx2),ENSMUSG00000001507(Itga3),ENSMUSG00000002233(Rhoc),ENSMUSG00000002603(Tgfb1),ENSMUSG00000003032(Klf4),ENSMUSG00000004791(Pgf),ENSMUSG00000006958(Chrd),ENSMUSG00000015134(Aldh1a3),ENSMUSG00000015468(Notch4),ENSMUSG00000015533(Itga2),ENSMUSG00000015619(Gata3),ENSMUSG00000015647(Lama5),ENSMUSG00000016918(Sulf1),ENSMUSG0000…	ENSMUSG00000000120(Ngfr),ENSMUSG00000000320(Alox12),ENSMUSG00000000567(Sox9),ENSMUSG00000000731(Aire),ENSMUSG00000000881(Dlg3),ENSMUSG00000000957(Mmp14),ENSMUSG00000001119(Col6a1),ENSMUSG00000001420(Tmem79),ENSMUSG00000004231(Pax2),ENSMUSG00000005087(Cd44),ENSMUSG00000005251(Ripk4),ENSMUSG00000006538(Ihh),ENSMUSG00000007877(Tcap),ENSMUSG00000007989(Fzd3),ENSMUSG00000008999(Bmp7),ENSMUSG0000000937…
BP	GO:0048584	positive regulation of response to stimulus	328	353	681	2172	1.8e-18	2.04263e-16	ENSMUSG00000000706(Btn1a1),ENSMUSG00000000791(Il12rb1),ENSMUSG00000000817(Fasl),ENSMUSG00000001020(S100a4),ENSMUSG00000001517(Foxm1),ENSMUSG00000001642(Akr1b3),ENSMUSG00000002015(Bcap31),ENSMUSG00000002250(Ppard),ENSMUSG00000002603(Tgfb1),ENSMUSG00000002944(Cd36),ENSMUSG00000003814(Calr),ENSMUSG00000004207(Psap),ENSMUSG00000004371(Il11),ENSMUSG00000004791(Pgf),ENSMUSG00000004951(Hspb1),ENSMUSG000…	ENSMUSG00000000120(Ngfr),ENSMUSG00000000126(Wnt9a),ENSMUSG00000000567(Sox9),ENSMUSG00000000732(Icosl),ENSMUSG00000000869(Il4),ENSMUSG00000001741(Il16),ENSMUSG00000002384(Bmp8b),ENSMUSG00000002985(Apoe),ENSMUSG00000003352(Cacnb3),ENSMUSG00000003379(Cd79a),ENSMUSG00000003882(Il7r),ENSMUSG00000004035(Gstm7),ENSMUSG00000004085(Map3k20),ENSMUSG00000005087(Cd44),ENSMUSG00000005320(Fgfr4),ENSMUSG0000000…
CC	GO:0099572	postsynaptic specialization	54	128	182	426	1.9e-18	2.14123e-16	ENSMUSG00000000560(Gabra2),ENSMUSG00000003200(Sh3gl1),ENSMUSG00000004951(Hspb1),ENSMUSG00000015766(Eps8),ENSMUSG00000020077(Srgn),ENSMUSG00000020315(Sptbn1),ENSMUSG00000020598(Nrcam),ENSMUSG00000021782(Dlg5),ENSMUSG00000022296(Baalc),ENSMUSG00000022494(Shisa9),ENSMUSG00000022602(Arc),ENSMUSG00000022790(Igsf11),ENSMUSG00000024873(Cnih2),ENSMUSG00000025026(Add3),ENSMUSG00000025085(Ablim1),ENSMUSG00…	ENSMUSG00000000120(Ngfr),ENSMUSG00000000627(Sema4f),ENSMUSG00000000861(Bcl11a),ENSMUSG00000000881(Dlg3),ENSMUSG00000001985(Grik3),ENSMUSG00000002104(Rapsn),ENSMUSG00000003279(Dlgap1),ENSMUSG00000003378(Grik5),ENSMUSG00000003872(Lin7b),ENSMUSG00000003934(Efnb3),ENSMUSG00000006476(Nsmf),ENSMUSG00000007653(Gabrb2),ENSMUSG00000009394(Syn2),ENSMUSG00000010086(Rnf112),ENSMUSG00000013236(Ptprs),ENSMUSG0…
CC	GO:0016020	membrane	1186	1405	2591	9807	2e-18	2.23849e-16	ENSMUSG00000000001(Gnai3),ENSMUSG00000000088(Cox5a),ENSMUSG00000000216(Scnn1g),ENSMUSG00000000305(Cdh4),ENSMUSG00000000325(Arvcf),ENSMUSG00000000420(Galnt1),ENSMUSG00000000555(Itga5),ENSMUSG00000000560(Gabra2),ENSMUSG00000000594(Gm2a),ENSMUSG00000000628(Hk2),ENSMUSG00000000706(Btn1a1),ENSMUSG00000000791(Il12rb1),ENSMUSG00000000792(Slc5a5),ENSMUSG00000000805(Car4),ENSMUSG00000000817(Fasl),ENSMUSG0…	ENSMUSG00000000120(Ngfr),ENSMUSG00000000154(Slc22a18),ENSMUSG00000000157(Itgb2l),ENSMUSG00000000159(Igsf5),ENSMUSG00000000184(Ccnd2),ENSMUSG00000000303(Cdh1),ENSMUSG00000000308(Ckmt1),ENSMUSG00000000320(Alox12),ENSMUSG00000000385(Tmprss2),ENSMUSG00000000392(Fap),ENSMUSG00000000402(Egfl6),ENSMUSG00000000562(Adora3),ENSMUSG00000000627(Sema4f),ENSMUSG00000000732(Icosl),ENSMUSG00000000794(Kcnn3),ENSM…
BP	GO:2000145	regulation of cell motility	178	162	340	947	2.2e-18	2.44559e-16	ENSMUSG00000000555(Itga5),ENSMUSG00000001131(Timp1),ENSMUSG00000001227(Sema6b),ENSMUSG00000001507(Itga3),ENSMUSG00000002233(Rhoc),ENSMUSG00000002250(Ppard),ENSMUSG00000002603(Tgfb1),ENSMUSG00000003032(Klf4),ENSMUSG00000003665(Has1),ENSMUSG00000003814(Calr),ENSMUSG00000004791(Pgf),ENSMUSG00000004951(Hspb1),ENSMUSG00000005413(Hmox1),ENSMUSG00000005672(Kit),ENSMUSG00000006304(Arpc2),ENSMUSG000000069…	ENSMUSG00000000303(Cdh1),ENSMUSG00000000320(Alox12),ENSMUSG00000000567(Sox9),ENSMUSG00000000627(Sema4f),ENSMUSG00000000731(Aire),ENSMUSG00000000753(Serpinf1),ENSMUSG00000000869(Il4),ENSMUSG00000000957(Mmp14),ENSMUSG00000001435(Col18a1),ENSMUSG00000001672(Marveld3),ENSMUSG00000002985(Apoe),ENSMUSG00000005533(Igf1r),ENSMUSG00000005824(Tnfsf14),ENSMUSG00000006476(Nsmf),ENSMUSG00000007805(Twist2),ENS…
BP	GO:0006793	phosphorus metabolic process	473	466	939	3152	2.6e-18	2.85145e-16	ENSMUSG00000000001(Gnai3),ENSMUSG00000000088(Cox5a),ENSMUSG00000000555(Itga5),ENSMUSG00000000628(Hk2),ENSMUSG00000000708(Kat2b),ENSMUSG00000000791(Il12rb1),ENSMUSG00000001517(Foxm1),ENSMUSG00000002250(Ppard),ENSMUSG00000002603(Tgfb1),ENSMUSG00000002944(Cd36),ENSMUSG00000003032(Klf4),ENSMUSG00000003271(Sult2b1),ENSMUSG00000003500(Impdh1),ENSMUSG00000003752(Itpkc),ENSMUSG00000004207(Psap),ENSMUSG00…	ENSMUSG00000000120(Ngfr),ENSMUSG00000000142(Axin2),ENSMUSG00000000184(Ccnd2),ENSMUSG00000000253(Gmpr),ENSMUSG00000000295(Hddc2),ENSMUSG00000000308(Ckmt1),ENSMUSG00000000567(Sox9),ENSMUSG00000000869(Il4),ENSMUSG00000000881(Dlg3),ENSMUSG00000001249(Hpn),ENSMUSG00000001270(Ckb),ENSMUSG00000001583(Tnk1),ENSMUSG00000001672(Marveld3),ENSMUSG00000002007(Srpk3),ENSMUSG00000002012(Pnck),ENSMUSG00000002384…
BP	GO:0044281	small molecule metabolic process	351	245	596	1861	2.6e-18	2.85145e-16	ENSMUSG00000000001(Gnai3),ENSMUSG00000000088(Cox5a),ENSMUSG00000000628(Hk2),ENSMUSG00000000708(Kat2b),ENSMUSG00000001467(Cyp51),ENSMUSG00000001642(Akr1b3),ENSMUSG00000001773(Folh1),ENSMUSG00000002250(Ppard),ENSMUSG00000002603(Tgfb1),ENSMUSG00000002944(Cd36),ENSMUSG00000003271(Sult2b1),ENSMUSG00000003500(Impdh1),ENSMUSG00000003665(Has1),ENSMUSG00000003752(Itpkc),ENSMUSG00000004709(Cd244a),ENSMUSG0…	ENSMUSG00000000253(Gmpr),ENSMUSG00000000320(Alox12),ENSMUSG00000000869(Il4),ENSMUSG00000000889(Dbh),ENSMUSG00000002985(Apoe),ENSMUSG00000003484(Cyp4f18),ENSMUSG00000003559(As3mt),ENSMUSG00000004035(Gstm7),ENSMUSG00000004939(Nmrk2),ENSMUSG00000005087(Cd44),ENSMUSG00000005320(Fgfr4),ENSMUSG00000005360(Slc1a3),ENSMUSG00000006522(Itih3),ENSMUSG00000006675(P4htm),ENSMUSG00000007039(Ddah2),ENSMUSG00000…
MF	GO:0015077	monovalent inorganic cation transmembrane transporter activity	71	82	153	341	6.2e-18	6.75428e-16	ENSMUSG00000000088(Cox5a),ENSMUSG00000000216(Scnn1g),ENSMUSG00000000792(Slc5a5),ENSMUSG00000006641(Slc5a6),ENSMUSG00000015575(Atp6v0e),ENSMUSG00000018470(Kcnab3),ENSMUSG00000018770(Atp5g3),ENSMUSG00000019210(Atp6v1e1),ENSMUSG00000019558(Slc6a8),ENSMUSG00000020062(Slc5a8),ENSMUSG00000020163(Uqcr11),ENSMUSG00000020226(Slc5a4b),ENSMUSG00000020566(Atp6v1c2),ENSMUSG00000021730(Hcn1),ENSMUSG00000023033…	ENSMUSG00000000794(Kcnn3),ENSMUSG00000001985(Grik3),ENSMUSG00000002908(Kcnn1),ENSMUSG00000003378(Grik5),ENSMUSG00000004988(Fxyd4),ENSMUSG00000005089(Slc1a2),ENSMUSG00000005360(Slc1a3),ENSMUSG00000007107(Atp1a4),ENSMUSG00000009246(Trpm5),ENSMUSG00000019894(Slc6a15),ENSMUSG00000020155(Kcnmb1),ENSMUSG00000020264(Slc36a2),ENSMUSG00000020788(Atp2a3),ENSMUSG00000020805(Slc13a5),ENSMUSG00000020838(Slc6a…
BP	GO:0006796	phosphate-containing compound metabolic process	458	458	916	3075	8e-18	8.65748e-16	ENSMUSG00000000001(Gnai3),ENSMUSG00000000088(Cox5a),ENSMUSG00000000555(Itga5),ENSMUSG00000000628(Hk2),ENSMUSG00000000708(Kat2b),ENSMUSG00000000791(Il12rb1),ENSMUSG00000001517(Foxm1),ENSMUSG00000002250(Ppard),ENSMUSG00000002603(Tgfb1),ENSMUSG00000002944(Cd36),ENSMUSG00000003032(Klf4),ENSMUSG00000003271(Sult2b1),ENSMUSG00000003500(Impdh1),ENSMUSG00000003752(Itpkc),ENSMUSG00000004207(Psap),ENSMUSG00…	ENSMUSG00000000120(Ngfr),ENSMUSG00000000142(Axin2),ENSMUSG00000000184(Ccnd2),ENSMUSG00000000253(Gmpr),ENSMUSG00000000295(Hddc2),ENSMUSG00000000308(Ckmt1),ENSMUSG00000000567(Sox9),ENSMUSG00000000869(Il4),ENSMUSG00000000881(Dlg3),ENSMUSG00000001249(Hpn),ENSMUSG00000001270(Ckb),ENSMUSG00000001583(Tnk1),ENSMUSG00000001672(Marveld3),ENSMUSG00000002007(Srpk3),ENSMUSG00000002012(Pnck),ENSMUSG00000002384…
CC	GO:0071944	cell periphery	714	970	1684	6094	1.2e-17	1.29008e-15	ENSMUSG00000000001(Gnai3),ENSMUSG00000000216(Scnn1g),ENSMUSG00000000305(Cdh4),ENSMUSG00000000325(Arvcf),ENSMUSG00000000555(Itga5),ENSMUSG00000000560(Gabra2),ENSMUSG00000000594(Gm2a),ENSMUSG00000000628(Hk2),ENSMUSG00000000706(Btn1a1),ENSMUSG00000000791(Il12rb1),ENSMUSG00000000792(Slc5a5),ENSMUSG00000000805(Car4),ENSMUSG00000000817(Fasl),ENSMUSG00000001021(S100a3),ENSMUSG00000001025(S100a6),ENSMUSG…	ENSMUSG00000000120(Ngfr),ENSMUSG00000000154(Slc22a18),ENSMUSG00000000157(Itgb2l),ENSMUSG00000000303(Cdh1),ENSMUSG00000000320(Alox12),ENSMUSG00000000385(Tmprss2),ENSMUSG00000000392(Fap),ENSMUSG00000000416(Cttnbp2),ENSMUSG00000000562(Adora3),ENSMUSG00000000627(Sema4f),ENSMUSG00000000732(Icosl),ENSMUSG00000000794(Kcnn3),ENSMUSG00000000869(Il4),ENSMUSG00000000881(Dlg3),ENSMUSG00000000957(Mmp14),ENSMU…
BP	GO:0046903	secretion	201	208	409	1198	1.4e-17	1.49525e-15	ENSMUSG00000000628(Hk2),ENSMUSG00000000706(Btn1a1),ENSMUSG00000001467(Cyp51),ENSMUSG00000002250(Ppard),ENSMUSG00000002603(Tgfb1),ENSMUSG00000002944(Cd36),ENSMUSG00000004113(Cacna1b),ENSMUSG00000004207(Psap),ENSMUSG00000004371(Il11),ENSMUSG00000004709(Cd244a),ENSMUSG00000005220(Corin),ENSMUSG00000005268(Prlr),ENSMUSG00000005413(Hmox1),ENSMUSG00000005672(Kit),ENSMUSG00000005891(Prl4a1),ENSMUSG00000…	ENSMUSG00000000869(Il4),ENSMUSG00000000903(Vpreb3),ENSMUSG00000001420(Tmem79),ENSMUSG00000001741(Il16),ENSMUSG00000002985(Apoe),ENSMUSG00000003378(Grik5),ENSMUSG00000003411(Rab3b),ENSMUSG00000003484(Cyp4f18),ENSMUSG00000003872(Lin7b),ENSMUSG00000004347(Pde1c),ENSMUSG00000006930(Hap1),ENSMUSG00000007034(Slc44a4),ENSMUSG00000007682(Dio2),ENSMUSG00000008601(Rab25),ENSMUSG00000009394(Syn2),ENSMUSG000…
MF	GO:0098772	molecular function regulator	300	275	575	1786	1.5e-17	1.59166e-15	ENSMUSG00000000594(Gm2a),ENSMUSG00000000708(Kat2b),ENSMUSG00000000817(Fasl),ENSMUSG00000000983(Wfdc18),ENSMUSG00000001131(Timp1),ENSMUSG00000001227(Sema6b),ENSMUSG00000001588(Acap1),ENSMUSG00000001995(Sipa1l2),ENSMUSG00000002250(Ppard),ENSMUSG00000002603(Tgfb1),ENSMUSG00000003032(Klf4),ENSMUSG00000004371(Il11),ENSMUSG00000004473(Clec11a),ENSMUSG00000004791(Pgf),ENSMUSG00000004951(Hspb1),ENSMUSG00…	ENSMUSG00000000126(Wnt9a),ENSMUSG00000000184(Ccnd2),ENSMUSG00000000627(Sema4f),ENSMUSG00000000730(Dnmt3l),ENSMUSG00000000753(Serpinf1),ENSMUSG00000000869(Il4),ENSMUSG00000001334(Fndc5),ENSMUSG00000001741(Il16),ENSMUSG00000002289(Angptl4),ENSMUSG00000002384(Bmp8b),ENSMUSG00000002459(Rgs20),ENSMUSG00000002985(Apoe),ENSMUSG00000003352(Cacnb3),ENSMUSG00000004988(Fxyd4),ENSMUSG00000005705(Agrp),ENSMUS…
BP	GO:0001944	vasculature development	157	117	274	735	2.1e-17	2.21394e-15	ENSMUSG00000000555(Itga5),ENSMUSG00000000628(Hk2),ENSMUSG00000000817(Fasl),ENSMUSG00000001098(Kctd10),ENSMUSG00000001510(Dlx3),ENSMUSG00000002603(Tgfb1),ENSMUSG00000002944(Cd36),ENSMUSG00000003032(Klf4),ENSMUSG00000004328(Hif3a),ENSMUSG00000004791(Pgf),ENSMUSG00000004951(Hspb1),ENSMUSG00000005148(Klf5),ENSMUSG00000005413(Hmox1),ENSMUSG00000005672(Kit),ENSMUSG00000007817(Zmiz1),ENSMUSG00000013076(…	ENSMUSG00000000120(Ngfr),ENSMUSG00000000392(Fap),ENSMUSG00000000753(Serpinf1),ENSMUSG00000000957(Mmp14),ENSMUSG00000001435(Col18a1),ENSMUSG00000001870(Ltbp1),ENSMUSG00000002289(Angptl4),ENSMUSG00000002985(Apoe),ENSMUSG00000005836(Gata6),ENSMUSG00000005958(Ephb3),ENSMUSG00000006538(Ihh),ENSMUSG00000008461(Fut1),ENSMUSG00000008855(Hdac5),ENSMUSG00000008999(Bmp7),ENSMUSG00000010797(Wnt2),ENSMUSG0000…
BP	GO:0000904	cell morphogenesis involved in differentiation	108	171	279	752	2.2e-17	2.3045e-15	ENSMUSG00000000305(Cdh4),ENSMUSG00000001227(Sema6b),ENSMUSG00000001627(Ifrd1),ENSMUSG00000003814(Calr),ENSMUSG00000004151(Etv1),ENSMUSG00000004885(Crabp2),ENSMUSG00000006304(Arpc2),ENSMUSG00000012819(Cdh23),ENSMUSG00000015468(Notch4),ENSMUSG00000015619(Gata3),ENSMUSG00000015647(Lama5),ENSMUSG00000017929(B4galt5),ENSMUSG00000019970(Sgk1),ENSMUSG00000020099(Unc5b),ENSMUSG00000020340(Cyfip2),ENSMUSG…	ENSMUSG00000000120(Ngfr),ENSMUSG00000000627(Sema4f),ENSMUSG00000000861(Bcl11a),ENSMUSG00000001119(Col6a1),ENSMUSG00000001435(Col18a1),ENSMUSG00000002985(Apoe),ENSMUSG00000003934(Efnb3),ENSMUSG00000005360(Slc1a3),ENSMUSG00000005958(Ephb3),ENSMUSG00000006476(Nsmf),ENSMUSG00000006538(Ihh),ENSMUSG00000007989(Fzd3),ENSMUSG00000008575(Nfib),ENSMUSG00000008601(Rab25),ENSMUSG00000008999(Bmp7),ENSMUSG0000…
BP	GO:0050801	ion homeostasis	134	168	302	830	2.4e-17	2.46657e-15	ENSMUSG00000000216(Scnn1g),ENSMUSG00000000805(Car4),ENSMUSG00000000817(Fasl),ENSMUSG00000002015(Bcap31),ENSMUSG00000002603(Tgfb1),ENSMUSG00000002944(Cd36),ENSMUSG00000003657(Calb2),ENSMUSG00000004113(Cacna1b),ENSMUSG00000005220(Corin),ENSMUSG00000005413(Hmox1),ENSMUSG00000006567(Atp7b),ENSMUSG00000006574(Slc4a1),ENSMUSG00000012819(Cdh23),ENSMUSG00000014077(Chp1),ENSMUSG00000017446(C1qtnf1),ENSMUS…	ENSMUSG00000000120(Ngfr),ENSMUSG00000000320(Alox12),ENSMUSG00000001270(Ckb),ENSMUSG00000002985(Apoe),ENSMUSG00000003352(Cacnb3),ENSMUSG00000004035(Gstm7),ENSMUSG00000006576(Slc4a3),ENSMUSG00000006930(Hap1),ENSMUSG00000007107(Atp1a4),ENSMUSG00000007122(Casq1),ENSMUSG00000011008(Mcoln2),ENSMUSG00000015968(Cacna1d),ENSMUSG00000017412(Cacnb4),ENSMUSG00000017817(Jph2),ENSMUSG00000018340(Anxa6),ENSMUSG…
BP	GO:0030855	epithelial cell differentiation	109	125	234	603	2.4e-17	2.46657e-15	ENSMUSG00000001510(Dlx3),ENSMUSG00000001642(Akr1b3),ENSMUSG00000002603(Tgfb1),ENSMUSG00000003032(Klf4),ENSMUSG00000003271(Sult2b1),ENSMUSG00000004207(Psap),ENSMUSG00000004894(Hapln2),ENSMUSG00000005148(Klf5),ENSMUSG00000005268(Prlr),ENSMUSG00000005355(Casp14),ENSMUSG00000012819(Cdh23),ENSMUSG00000015468(Notch4),ENSMUSG00000015533(Itga2),ENSMUSG00000015619(Gata3),ENSMUSG00000017491(Rarb),ENSMUSG00…	ENSMUSG00000000567(Sox9),ENSMUSG00000001420(Tmem79),ENSMUSG00000001435(Col18a1),ENSMUSG00000003051(Elf3),ENSMUSG00000005836(Gata6),ENSMUSG00000006538(Ihh),ENSMUSG00000007034(Slc44a4),ENSMUSG00000008575(Nfib),ENSMUSG00000008601(Rab25),ENSMUSG00000008999(Bmp7),ENSMUSG00000009376(Met),ENSMUSG00000012350(Ehf),ENSMUSG00000013236(Ptprs),ENSMUSG00000015957(Wnt11),ENSMUSG00000017390(Aldoc),ENSMUSG0000001…
CC	GO:0005886	plasma membrane	699	946	1645	5946	2.4e-17	2.46657e-15	ENSMUSG00000000001(Gnai3),ENSMUSG00000000216(Scnn1g),ENSMUSG00000000305(Cdh4),ENSMUSG00000000325(Arvcf),ENSMUSG00000000555(Itga5),ENSMUSG00000000560(Gabra2),ENSMUSG00000000594(Gm2a),ENSMUSG00000000628(Hk2),ENSMUSG00000000706(Btn1a1),ENSMUSG00000000791(Il12rb1),ENSMUSG00000000792(Slc5a5),ENSMUSG00000000805(Car4),ENSMUSG00000000817(Fasl),ENSMUSG00000001021(S100a3),ENSMUSG00000001025(S100a6),ENSMUSG…	ENSMUSG00000000120(Ngfr),ENSMUSG00000000154(Slc22a18),ENSMUSG00000000157(Itgb2l),ENSMUSG00000000303(Cdh1),ENSMUSG00000000320(Alox12),ENSMUSG00000000385(Tmprss2),ENSMUSG00000000392(Fap),ENSMUSG00000000562(Adora3),ENSMUSG00000000627(Sema4f),ENSMUSG00000000732(Icosl),ENSMUSG00000000794(Kcnn3),ENSMUSG00000000869(Il4),ENSMUSG00000000881(Dlg3),ENSMUSG00000000957(Mmp14),ENSMUSG00000001119(Col6a1),ENSMUS…
BP	GO:0003012	muscle system process	79	92	171	404	4e-17	4.08525e-15	ENSMUSG00000003032(Klf4),ENSMUSG00000005672(Kit),ENSMUSG00000006457(Actn3),ENSMUSG00000006800(Sulf2),ENSMUSG00000015533(Itga2),ENSMUSG00000016918(Sulf1),ENSMUSG00000017400(Stac2),ENSMUSG00000017697(Ada),ENSMUSG00000018500(Adora2b),ENSMUSG00000018932(Map2k3),ENSMUSG00000019997(Ccn2),ENSMUSG00000020475(Pgam2),ENSMUSG00000020580(Rock2),ENSMUSG00000021194(Chga),ENSMUSG00000021313(Ryr2),ENSMUSG0000002…	ENSMUSG00000001508(Sgca),ENSMUSG00000005611(Mrvi1),ENSMUSG00000005628(Tmod4),ENSMUSG00000005836(Gata6),ENSMUSG00000007122(Casq1),ENSMUSG00000007877(Tcap),ENSMUSG00000015968(Cacna1d),ENSMUSG00000018340(Anxa6),ENSMUSG00000019789(Hey2),ENSMUSG00000020061(Mybpc1),ENSMUSG00000020439(Smtn),ENSMUSG00000020787(P2rx1),ENSMUSG00000020866(Cacna1g),ENSMUSG00000021070(Bdkrb2),ENSMUSG00000021367(Edn1),ENSMUSG0…
BP	GO:0040012	regulation of locomotion	188	169	357	1023	4.6e-17	4.66886e-15	ENSMUSG00000000555(Itga5),ENSMUSG00000001131(Timp1),ENSMUSG00000001227(Sema6b),ENSMUSG00000001507(Itga3),ENSMUSG00000002233(Rhoc),ENSMUSG00000002250(Ppard),ENSMUSG00000002603(Tgfb1),ENSMUSG00000003032(Klf4),ENSMUSG00000003665(Has1),ENSMUSG00000003814(Calr),ENSMUSG00000004791(Pgf),ENSMUSG00000004951(Hspb1),ENSMUSG00000005413(Hmox1),ENSMUSG00000005672(Kit),ENSMUSG00000006304(Arpc2),ENSMUSG000000069…	ENSMUSG00000000303(Cdh1),ENSMUSG00000000320(Alox12),ENSMUSG00000000567(Sox9),ENSMUSG00000000627(Sema4f),ENSMUSG00000000731(Aire),ENSMUSG00000000753(Serpinf1),ENSMUSG00000000869(Il4),ENSMUSG00000000957(Mmp14),ENSMUSG00000001435(Col18a1),ENSMUSG00000001672(Marveld3),ENSMUSG00000001741(Il16),ENSMUSG00000002985(Apoe),ENSMUSG00000005533(Igf1r),ENSMUSG00000005824(Tnfsf14),ENSMUSG00000006476(Nsmf),ENSMU…
CC	GO:0005737	cytoplasm	1390	1420	2810	10780	4.7e-17	4.74091e-15	ENSMUSG00000000001(Gnai3),ENSMUSG00000000088(Cox5a),ENSMUSG00000000325(Arvcf),ENSMUSG00000000420(Galnt1),ENSMUSG00000000555(Itga5),ENSMUSG00000000560(Gabra2),ENSMUSG00000000594(Gm2a),ENSMUSG00000000628(Hk2),ENSMUSG00000000708(Kat2b),ENSMUSG00000000805(Car4),ENSMUSG00000000817(Fasl),ENSMUSG00000001020(S100a4),ENSMUSG00000001021(S100a3),ENSMUSG00000001025(S100a6),ENSMUSG00000001098(Kctd10),ENSMUSG0…	ENSMUSG00000000120(Ngfr),ENSMUSG00000000142(Axin2),ENSMUSG00000000154(Slc22a18),ENSMUSG00000000157(Itgb2l),ENSMUSG00000000184(Ccnd2),ENSMUSG00000000253(Gmpr),ENSMUSG00000000295(Hddc2),ENSMUSG00000000303(Cdh1),ENSMUSG00000000308(Ckmt1),ENSMUSG00000000320(Alox12),ENSMUSG00000000416(Cttnbp2),ENSMUSG00000000627(Sema4f),ENSMUSG00000000730(Dnmt3l),ENSMUSG00000000731(Aire),ENSMUSG00000000732(Icosl),ENSM…
MF	GO:0030545	receptor regulator activity	122	98	220	558	5.9e-17	5.91484e-15	ENSMUSG00000000817(Fasl),ENSMUSG00000001131(Timp1),ENSMUSG00000001227(Sema6b),ENSMUSG00000002603(Tgfb1),ENSMUSG00000004371(Il11),ENSMUSG00000004473(Clec11a),ENSMUSG00000004791(Pgf),ENSMUSG00000005891(Prl4a1),ENSMUSG00000005892(Trh),ENSMUSG00000006488(Prl7a1),ENSMUSG00000006490(Prl8a9),ENSMUSG00000012705(Retn),ENSMUSG00000015812(Gnrh1),ENSMUSG00000017064(Prl5a1),ENSMUSG00000017311(Pyy),ENSMUSG0000…	ENSMUSG00000000126(Wnt9a),ENSMUSG00000000627(Sema4f),ENSMUSG00000000869(Il4),ENSMUSG00000001334(Fndc5),ENSMUSG00000001741(Il16),ENSMUSG00000002384(Bmp8b),ENSMUSG00000005705(Agrp),ENSMUSG00000005824(Tnfsf14),ENSMUSG00000008999(Bmp7),ENSMUSG00000010797(Wnt2),ENSMUSG00000013766(Ly6g6e),ENSMUSG00000018238(Gdf9),ENSMUSG00000018752(Tnfsfm13),ENSMUSG00000018920(Cxcl16),ENSMUSG00000018927(Ccl6),ENSMUSG00…
BP	GO:0072358	cardiovascular system development	158	118	276	747	6.3e-17	6.27734e-15	ENSMUSG00000000555(Itga5),ENSMUSG00000000628(Hk2),ENSMUSG00000000817(Fasl),ENSMUSG00000001098(Kctd10),ENSMUSG00000001510(Dlx3),ENSMUSG00000002603(Tgfb1),ENSMUSG00000002944(Cd36),ENSMUSG00000003032(Klf4),ENSMUSG00000004328(Hif3a),ENSMUSG00000004791(Pgf),ENSMUSG00000004951(Hspb1),ENSMUSG00000005148(Klf5),ENSMUSG00000005413(Hmox1),ENSMUSG00000005672(Kit),ENSMUSG00000007817(Zmiz1),ENSMUSG00000013076(…	ENSMUSG00000000120(Ngfr),ENSMUSG00000000392(Fap),ENSMUSG00000000753(Serpinf1),ENSMUSG00000000957(Mmp14),ENSMUSG00000001435(Col18a1),ENSMUSG00000001870(Ltbp1),ENSMUSG00000002289(Angptl4),ENSMUSG00000002985(Apoe),ENSMUSG00000005836(Gata6),ENSMUSG00000005958(Ephb3),ENSMUSG00000006538(Ihh),ENSMUSG00000008461(Fut1),ENSMUSG00000008855(Hdac5),ENSMUSG00000008999(Bmp7),ENSMUSG00000010797(Wnt2),ENSMUSG0000…
BP	GO:1901615	organic hydroxy compound metabolic process	116	80	196	485	7.6e-17	7.52676e-15	ENSMUSG00000000792(Slc5a5),ENSMUSG00000001467(Cyp51),ENSMUSG00000001642(Akr1b3),ENSMUSG00000003271(Sult2b1),ENSMUSG00000003752(Itpkc),ENSMUSG00000004709(Cd244a),ENSMUSG00000005672(Kit),ENSMUSG00000006457(Actn3),ENSMUSG00000006517(Mvd),ENSMUSG00000010025(Aldh3a2),ENSMUSG00000015134(Aldh1a3),ENSMUSG00000015619(Gata3),ENSMUSG00000018042(Cyb5r3),ENSMUSG00000018861(Fdxr),ENSMUSG00000019139(Isyna1),ENS…	ENSMUSG00000000320(Alox12),ENSMUSG00000000869(Il4),ENSMUSG00000000889(Dbh),ENSMUSG00000001249(Hpn),ENSMUSG00000002985(Apoe),ENSMUSG00000003484(Cyp4f18),ENSMUSG00000005320(Fgfr4),ENSMUSG00000007682(Dio2),ENSMUSG00000012187(Mogat1),ENSMUSG00000017754(Pltp),ENSMUSG00000018924(Alox15),ENSMUSG00000019762(Iyd),ENSMUSG00000020098(Pcbd1),ENSMUSG00000020405(Fabp6),ENSMUSG00000020447(Npc1l1),ENSMUSG0000002…
BP	GO:0006936	muscle contraction	57	77	134	294	8.3e-17	8.1705e-15	ENSMUSG00000005672(Kit),ENSMUSG00000006457(Actn3),ENSMUSG00000006800(Sulf2),ENSMUSG00000015533(Itga2),ENSMUSG00000016918(Sulf1),ENSMUSG00000017400(Stac2),ENSMUSG00000017697(Ada),ENSMUSG00000018500(Adora2b),ENSMUSG00000018932(Map2k3),ENSMUSG00000019997(Ccn2),ENSMUSG00000020475(Pgam2),ENSMUSG00000020580(Rock2),ENSMUSG00000021194(Chga),ENSMUSG00000021313(Ryr2),ENSMUSG00000021699(Pde4d),ENSMUSG000000…	ENSMUSG00000005611(Mrvi1),ENSMUSG00000005628(Tmod4),ENSMUSG00000007122(Casq1),ENSMUSG00000007877(Tcap),ENSMUSG00000015968(Cacna1d),ENSMUSG00000018340(Anxa6),ENSMUSG00000020061(Mybpc1),ENSMUSG00000020439(Smtn),ENSMUSG00000020787(P2rx1),ENSMUSG00000020866(Cacna1g),ENSMUSG00000021070(Bdkrb2),ENSMUSG00000021367(Edn1),ENSMUSG00000021870(Slmap),ENSMUSG00000022144(Gdnf),ENSMUSG00000022836(Mylk),ENSMUSG0…
CC	GO:0098794	postsynapse	85	185	270	726	9e-17	8.80653e-15	ENSMUSG00000000560(Gabra2),ENSMUSG00000001260(Gabrg1),ENSMUSG00000003200(Sh3gl1),ENSMUSG00000004951(Hspb1),ENSMUSG00000006304(Arpc2),ENSMUSG00000013415(Igf2bp1),ENSMUSG00000015766(Eps8),ENSMUSG00000019558(Slc6a8),ENSMUSG00000020077(Srgn),ENSMUSG00000020315(Sptbn1),ENSMUSG00000020368(Canx),ENSMUSG00000020598(Nrcam),ENSMUSG00000020689(Itgb3),ENSMUSG00000021259(Cyp46a1),ENSMUSG00000021782(Dlg5),ENSM…	ENSMUSG00000000120(Ngfr),ENSMUSG00000000303(Cdh1),ENSMUSG00000000416(Cttnbp2),ENSMUSG00000000627(Sema4f),ENSMUSG00000000861(Bcl11a),ENSMUSG00000000881(Dlg3),ENSMUSG00000001985(Grik3),ENSMUSG00000002104(Rapsn),ENSMUSG00000003279(Dlgap1),ENSMUSG00000003378(Grik5),ENSMUSG00000003872(Lin7b),ENSMUSG00000003934(Efnb3),ENSMUSG00000005089(Slc1a2),ENSMUSG00000005360(Slc1a3),ENSMUSG00000006476(Nsmf),ENSMUS…
BP	GO:0010648	negative regulation of cell communication	195	235	430	1288	1.4e-16	1.36175e-14	ENSMUSG00000000001(Gnai3),ENSMUSG00000001098(Kctd10),ENSMUSG00000001507(Itga3),ENSMUSG00000001517(Foxm1),ENSMUSG00000003032(Klf4),ENSMUSG00000003814(Calr),ENSMUSG00000004371(Il11),ENSMUSG00000004951(Hspb1),ENSMUSG00000005161(Prdx2),ENSMUSG00000005413(Hmox1),ENSMUSG00000006205(Htra1),ENSMUSG00000006457(Actn3),ENSMUSG00000006800(Sulf2),ENSMUSG00000006958(Chrd),ENSMUSG00000007659(Bcl2l1),ENSMUSG0000…	ENSMUSG00000000120(Ngfr),ENSMUSG00000000142(Axin2),ENSMUSG00000000567(Sox9),ENSMUSG00000000869(Il4),ENSMUSG00000000957(Mmp14),ENSMUSG00000001494(Sost),ENSMUSG00000001583(Tnk1),ENSMUSG00000001672(Marveld3),ENSMUSG00000001870(Ltbp1),ENSMUSG00000001985(Grik3),ENSMUSG00000002032(Tmem25),ENSMUSG00000002459(Rgs20),ENSMUSG00000002985(Apoe),ENSMUSG00000003452(Bicd1),ENSMUSG00000004035(Gstm7),ENSMUSG00000…
BP	GO:0023057	negative regulation of signaling	196	235	431	1292	1.5e-16	1.44185e-14	ENSMUSG00000000001(Gnai3),ENSMUSG00000001098(Kctd10),ENSMUSG00000001507(Itga3),ENSMUSG00000001517(Foxm1),ENSMUSG00000003032(Klf4),ENSMUSG00000003814(Calr),ENSMUSG00000004371(Il11),ENSMUSG00000004951(Hspb1),ENSMUSG00000005161(Prdx2),ENSMUSG00000005413(Hmox1),ENSMUSG00000006205(Htra1),ENSMUSG00000006457(Actn3),ENSMUSG00000006800(Sulf2),ENSMUSG00000006958(Chrd),ENSMUSG00000007659(Bcl2l1),ENSMUSG0000…	ENSMUSG00000000120(Ngfr),ENSMUSG00000000142(Axin2),ENSMUSG00000000567(Sox9),ENSMUSG00000000869(Il4),ENSMUSG00000000957(Mmp14),ENSMUSG00000001494(Sost),ENSMUSG00000001583(Tnk1),ENSMUSG00000001672(Marveld3),ENSMUSG00000001870(Ltbp1),ENSMUSG00000001985(Grik3),ENSMUSG00000002032(Tmem25),ENSMUSG00000002459(Rgs20),ENSMUSG00000002985(Apoe),ENSMUSG00000003452(Bicd1),ENSMUSG00000004035(Gstm7),ENSMUSG00000…
BP	GO:0009967	positive regulation of signal transduction	242	258	500	1541	1.5e-16	1.44185e-14	ENSMUSG00000000817(Fasl),ENSMUSG00000001020(S100a4),ENSMUSG00000001642(Akr1b3),ENSMUSG00000002015(Bcap31),ENSMUSG00000002250(Ppard),ENSMUSG00000002603(Tgfb1),ENSMUSG00000002944(Cd36),ENSMUSG00000003814(Calr),ENSMUSG00000004207(Psap),ENSMUSG00000004371(Il11),ENSMUSG00000005045(Chd5),ENSMUSG00000005057(Sh2b2),ENSMUSG00000005161(Prdx2),ENSMUSG00000005268(Prlr),ENSMUSG00000005672(Kit),ENSMUSG00000005…	ENSMUSG00000000120(Ngfr),ENSMUSG00000000126(Wnt9a),ENSMUSG00000000567(Sox9),ENSMUSG00000000869(Il4),ENSMUSG00000002384(Bmp8b),ENSMUSG00000002985(Apoe),ENSMUSG00000003352(Cacnb3),ENSMUSG00000003882(Il7r),ENSMUSG00000004035(Gstm7),ENSMUSG00000004085(Map3k20),ENSMUSG00000005087(Cd44),ENSMUSG00000005320(Fgfr4),ENSMUSG00000005718(Tfap4),ENSMUSG00000005824(Tnfsf14),ENSMUSG00000005836(Gata6),ENSMUSG0000…
BP	GO:1901700	response to oxygen-containing compound	292	254	546	1710	1.7e-16	1.62454e-14	ENSMUSG00000000708(Kat2b),ENSMUSG00000000792(Slc5a5),ENSMUSG00000000817(Fasl),ENSMUSG00000001131(Timp1),ENSMUSG00000001642(Akr1b3),ENSMUSG00000002250(Ppard),ENSMUSG00000002603(Tgfb1),ENSMUSG00000002944(Cd36),ENSMUSG00000003032(Klf4),ENSMUSG00000003814(Calr),ENSMUSG00000004031(Brinp2),ENSMUSG00000004113(Cacna1b),ENSMUSG00000004207(Psap),ENSMUSG00000005057(Sh2b2),ENSMUSG00000005148(Klf5),ENSMUSG000…	ENSMUSG00000000120(Ngfr),ENSMUSG00000000303(Cdh1),ENSMUSG00000000567(Sox9),ENSMUSG00000000753(Serpinf1),ENSMUSG00000000861(Bcl11a),ENSMUSG00000000889(Dbh),ENSMUSG00000001119(Col6a1),ENSMUSG00000001663(Gstt1),ENSMUSG00000003378(Grik5),ENSMUSG00000004347(Pde1c),ENSMUSG00000004864(Mapk13),ENSMUSG00000005089(Slc1a2),ENSMUSG00000005360(Slc1a3),ENSMUSG00000005533(Igf1r),ENSMUSG00000005705(Agrp),ENSMUSG…
BP	GO:0042330	taxis	107	120	227	589	1.8e-16	1.7101e-14	ENSMUSG00000000305(Cdh4),ENSMUSG00000001227(Sema6b),ENSMUSG00000002603(Tgfb1),ENSMUSG00000003814(Calr),ENSMUSG00000004151(Etv1),ENSMUSG00000004791(Pgf),ENSMUSG00000004951(Hspb1),ENSMUSG00000005672(Kit),ENSMUSG00000015533(Itga2),ENSMUSG00000015619(Gata3),ENSMUSG00000016024(Lbp),ENSMUSG00000019278(Dpep1),ENSMUSG00000020099(Unc5b),ENSMUSG00000020340(Cyfip2),ENSMUSG00000020598(Nrcam),ENSMUSG000000206…	ENSMUSG00000000120(Ngfr),ENSMUSG00000000627(Sema4f),ENSMUSG00000000869(Il4),ENSMUSG00000001741(Il16),ENSMUSG00000003934(Efnb3),ENSMUSG00000005824(Tnfsf14),ENSMUSG00000005958(Ephb3),ENSMUSG00000007989(Fzd3),ENSMUSG00000008575(Nfib),ENSMUSG00000008999(Bmp7),ENSMUSG00000009376(Met),ENSMUSG00000014704(Hoxa2),ENSMUSG00000018819(Lsp1),ENSMUSG00000018920(Cxcl16),ENSMUSG00000018927(Ccl6),ENSMUSG000000206…
BP	GO:0006935	chemotaxis	107	119	226	586	1.9e-16	1.79468e-14	ENSMUSG00000000305(Cdh4),ENSMUSG00000001227(Sema6b),ENSMUSG00000002603(Tgfb1),ENSMUSG00000003814(Calr),ENSMUSG00000004151(Etv1),ENSMUSG00000004791(Pgf),ENSMUSG00000004951(Hspb1),ENSMUSG00000005672(Kit),ENSMUSG00000015533(Itga2),ENSMUSG00000015619(Gata3),ENSMUSG00000016024(Lbp),ENSMUSG00000019278(Dpep1),ENSMUSG00000020099(Unc5b),ENSMUSG00000020340(Cyfip2),ENSMUSG00000020598(Nrcam),ENSMUSG000000206…	ENSMUSG00000000120(Ngfr),ENSMUSG00000000627(Sema4f),ENSMUSG00000000869(Il4),ENSMUSG00000001741(Il16),ENSMUSG00000003934(Efnb3),ENSMUSG00000005824(Tnfsf14),ENSMUSG00000005958(Ephb3),ENSMUSG00000007989(Fzd3),ENSMUSG00000008575(Nfib),ENSMUSG00000008999(Bmp7),ENSMUSG00000009376(Met),ENSMUSG00000014704(Hoxa2),ENSMUSG00000018819(Lsp1),ENSMUSG00000018920(Cxcl16),ENSMUSG00000018927(Ccl6),ENSMUSG000000206…
BP	GO:0051962	positive regulation of nervous system development	81	157	238	628	3.3e-16	3.09916e-14	ENSMUSG00000000305(Cdh4),ENSMUSG00000000708(Kat2b),ENSMUSG00000001507(Itga3),ENSMUSG00000002603(Tgfb1),ENSMUSG00000004031(Brinp2),ENSMUSG00000004885(Crabp2),ENSMUSG00000004951(Hspb1),ENSMUSG00000005672(Kit),ENSMUSG00000017491(Rarb),ENSMUSG00000019970(Sgk1),ENSMUSG00000020857(Nme2),ENSMUSG00000021068(Nin),ENSMUSG00000021318(Gli3),ENSMUSG00000021782(Dlg5),ENSMUSG00000022212(Cpne6),ENSMUSG0000002289…	ENSMUSG00000000120(Ngfr),ENSMUSG00000000753(Serpinf1),ENSMUSG00000000861(Bcl11a),ENSMUSG00000002985(Apoe),ENSMUSG00000003282(Plag1),ENSMUSG00000003948(Mmd),ENSMUSG00000005958(Ephb3),ENSMUSG00000006476(Nsmf),ENSMUSG00000006930(Hap1),ENSMUSG00000007989(Fzd3),ENSMUSG00000008999(Bmp7),ENSMUSG00000010086(Rnf112),ENSMUSG00000010797(Wnt2),ENSMUSG00000013089(Etv5),ENSMUSG00000019178(Styxl1),ENSMUSG000000…
BP	GO:0010959	regulation of metal ion transport	64	109	173	418	3.5e-16	3.2682e-14	ENSMUSG00000002603(Tgfb1),ENSMUSG00000004113(Cacna1b),ENSMUSG00000009687(Fxyd5),ENSMUSG00000014077(Chp1),ENSMUSG00000017400(Stac2),ENSMUSG00000019970(Sgk1),ENSMUSG00000020689(Itgb3),ENSMUSG00000020722(Cacng1),ENSMUSG00000020793(Galr2),ENSMUSG00000020893(Per1),ENSMUSG00000020907(Rcvrn),ENSMUSG00000021313(Ryr2),ENSMUSG00000021591(Glrx),ENSMUSG00000021699(Pde4d),ENSMUSG00000024042(Sik1),ENSMUSG00000…	ENSMUSG00000001741(Il16),ENSMUSG00000003352(Cacnb3),ENSMUSG00000004035(Gstm7),ENSMUSG00000004988(Fxyd4),ENSMUSG00000006930(Hap1),ENSMUSG00000007122(Casq1),ENSMUSG00000011751(Sptbn4),ENSMUSG00000015968(Cacna1d),ENSMUSG00000017412(Cacnb4),ENSMUSG00000017817(Jph2),ENSMUSG00000019699(Akt3),ENSMUSG00000019787(Trdn),ENSMUSG00000019933(Mrln),ENSMUSG00000020155(Kcnmb1),ENSMUSG00000020577(Tspan13),ENSMUSG…
BP	GO:0019932	second-messenger-mediated signaling	62	109	171	412	3.8e-16	3.50824e-14	ENSMUSG00000002015(Bcap31),ENSMUSG00000002944(Cd36),ENSMUSG00000006457(Actn3),ENSMUSG00000014077(Chp1),ENSMUSG00000017697(Ada),ENSMUSG00000018334(Ksr1),ENSMUSG00000018500(Adora2b),ENSMUSG00000019772(Vip),ENSMUSG00000020225(Tmbim4),ENSMUSG00000020793(Galr2),ENSMUSG00000020857(Nme2),ENSMUSG00000020963(Tshr),ENSMUSG00000021194(Chga),ENSMUSG00000021313(Ryr2),ENSMUSG00000021699(Pde4d),ENSMUSG000000217…	ENSMUSG00000000567(Sox9),ENSMUSG00000002985(Apoe),ENSMUSG00000004035(Gstm7),ENSMUSG00000004730(Adgre1),ENSMUSG00000005611(Mrvi1),ENSMUSG00000006575(Rundc3a),ENSMUSG00000006930(Hap1),ENSMUSG00000007122(Casq1),ENSMUSG00000008136(Fhl2),ENSMUSG00000015968(Cacna1d),ENSMUSG00000017817(Jph2),ENSMUSG00000019787(Trdn),ENSMUSG00000020123(Avpr1a),ENSMUSG00000020140(Lgr5),ENSMUSG00000020431(Adcy1),ENSMUSG000…
CC	GO:0031982	vesicle	322	298	620	1983	3.8e-16	3.50824e-14	ENSMUSG00000000001(Gnai3),ENSMUSG00000000216(Scnn1g),ENSMUSG00000000555(Itga5),ENSMUSG00000000560(Gabra2),ENSMUSG00000000805(Car4),ENSMUSG00000000817(Fasl),ENSMUSG00000001424(Snd1),ENSMUSG00000001588(Acap1),ENSMUSG00000001751(Naglu),ENSMUSG00000002015(Bcap31),ENSMUSG00000002204(Napsa),ENSMUSG00000002233(Rhoc),ENSMUSG00000002603(Tgfb1),ENSMUSG00000002847(Pla1a),ENSMUSG00000002957(Ap2a2),ENSMUSG000…	ENSMUSG00000000120(Ngfr),ENSMUSG00000000157(Itgb2l),ENSMUSG00000000416(Cttnbp2),ENSMUSG00000000753(Serpinf1),ENSMUSG00000000889(Dbh),ENSMUSG00000000957(Mmp14),ENSMUSG00000001672(Marveld3),ENSMUSG00000001865(Cpa3),ENSMUSG00000002032(Tmem25),ENSMUSG00000002985(Apoe),ENSMUSG00000003309(Ap1m2),ENSMUSG00000003379(Cd79a),ENSMUSG00000003411(Rab3b),ENSMUSG00000003452(Bicd1),ENSMUSG00000003948(Mmd),ENSMUS…
BP	GO:1903522	regulation of blood circulation	52	61	113	239	8.6e-16	7.89509e-14	ENSMUSG00000004113(Cacna1b),ENSMUSG00000017697(Ada),ENSMUSG00000019997(Ccn2),ENSMUSG00000020184(Mdm2),ENSMUSG00000021194(Chga),ENSMUSG00000021313(Ryr2),ENSMUSG00000021699(Pde4d),ENSMUSG00000024065(Ehd3),ENSMUSG00000024140(Epas1),ENSMUSG00000025026(Add3),ENSMUSG00000025701(Alox5),ENSMUSG00000025880(Smad7),ENSMUSG00000026313(Hdac4),ENSMUSG00000026360(Rgs2),ENSMUSG00000027488(Snta1),ENSMUSG000000280…	ENSMUSG00000000889(Dbh),ENSMUSG00000006576(Slc4a3),ENSMUSG00000011751(Sptbn4),ENSMUSG00000015968(Cacna1d),ENSMUSG00000019789(Hey2),ENSMUSG00000020123(Avpr1a),ENSMUSG00000020439(Smtn),ENSMUSG00000020787(P2rx1),ENSMUSG00000020866(Cacna1g),ENSMUSG00000021367(Edn1),ENSMUSG00000021678(F2rl1),ENSMUSG00000021779(Thrb),ENSMUSG00000022803(Popdc2),ENSMUSG00000022865(Cxadr),ENSMUSG00000024027(Glp1r),ENSMUSG…
CC	GO:0045177	apical part of cell	89	92	181	446	1.1e-15	1.0042e-13	ENSMUSG00000000216(Scnn1g),ENSMUSG00000000594(Gm2a),ENSMUSG00000000805(Car4),ENSMUSG00000002944(Cd36),ENSMUSG00000006273(Atp6v1b2),ENSMUSG00000006567(Atp7b),ENSMUSG00000010095(Slc3a2),ENSMUSG00000012819(Cdh23),ENSMUSG00000013076(Amotl1),ENSMUSG00000016194(Hsd11b1),ENSMUSG00000017309(Cd300lg),ENSMUSG00000017716(Birc5),ENSMUSG00000018900(Slc22a5),ENSMUSG00000019210(Atp6v1e1),ENSMUSG00000019278(Dpep…	ENSMUSG00000000154(Slc22a18),ENSMUSG00000000392(Fap),ENSMUSG00000000889(Dbh),ENSMUSG00000001249(Hpn),ENSMUSG00000003352(Cacnb3),ENSMUSG00000003484(Cyp4f18),ENSMUSG00000005087(Cd44),ENSMUSG00000007034(Slc44a4),ENSMUSG00000007989(Fzd3),ENSMUSG00000015968(Cacna1d),ENSMUSG00000018340(Anxa6),ENSMUSG00000019989(Enpp3),ENSMUSG00000021636(Marveld2),ENSMUSG00000021638(Ocln),ENSMUSG00000022197(Pdzd2),ENSMU…
BP	GO:0072503	cellular divalent inorganic cation homeostasis	83	120	203	521	2e-15	1.81567e-13	ENSMUSG00000000817(Fasl),ENSMUSG00000002015(Bcap31),ENSMUSG00000002603(Tgfb1),ENSMUSG00000002944(Cd36),ENSMUSG00000003657(Calb2),ENSMUSG00000004113(Cacna1b),ENSMUSG00000006567(Atp7b),ENSMUSG00000012819(Cdh23),ENSMUSG00000017446(C1qtnf1),ENSMUSG00000020689(Itgb3),ENSMUSG00000020793(Galr2),ENSMUSG00000020937(Plcd3),ENSMUSG00000021143(Pacs2),ENSMUSG00000021194(Chga),ENSMUSG00000021313(Ryr2),ENSMUSG0…	ENSMUSG00000002985(Apoe),ENSMUSG00000003352(Cacnb3),ENSMUSG00000004035(Gstm7),ENSMUSG00000006930(Hap1),ENSMUSG00000007122(Casq1),ENSMUSG00000011008(Mcoln2),ENSMUSG00000015968(Cacna1d),ENSMUSG00000017412(Cacnb4),ENSMUSG00000017817(Jph2),ENSMUSG00000018340(Anxa6),ENSMUSG00000019787(Trdn),ENSMUSG00000020123(Avpr1a),ENSMUSG00000020524(Gria1),ENSMUSG00000020787(P2rx1),ENSMUSG00000020788(Atp2a3),ENSMUS…
BP	GO:0008219	cell death	330	308	638	2073	2.1e-15	1.8855e-13	ENSMUSG00000000001(Gnai3),ENSMUSG00000000555(Itga5),ENSMUSG00000000628(Hk2),ENSMUSG00000000817(Fasl),ENSMUSG00000001131(Timp1),ENSMUSG00000001642(Akr1b3),ENSMUSG00000001773(Folh1),ENSMUSG00000002015(Bcap31),ENSMUSG00000002250(Ppard),ENSMUSG00000002565(Scin),ENSMUSG00000002603(Tgfb1),ENSMUSG00000002944(Cd36),ENSMUSG00000003032(Klf4),ENSMUSG00000003541(Ier3),ENSMUSG00000004207(Psap),ENSMUSG00000004…	ENSMUSG00000000120(Ngfr),ENSMUSG00000000126(Wnt9a),ENSMUSG00000000142(Axin2),ENSMUSG00000000184(Ccnd2),ENSMUSG00000000308(Ckmt1),ENSMUSG00000000320(Alox12),ENSMUSG00000000392(Fap),ENSMUSG00000000567(Sox9),ENSMUSG00000000753(Serpinf1),ENSMUSG00000000782(Tcf7),ENSMUSG00000000869(Il4),ENSMUSG00000000889(Dbh),ENSMUSG00000001249(Hpn),ENSMUSG00000001420(Tmem79),ENSMUSG00000001435(Col18a1),ENSMUSG000000…
CC	GO:0099240	intrinsic component of synaptic membrane	27	82	109	229	2.1e-15	1.8855e-13	ENSMUSG00000000560(Gabra2),ENSMUSG00000003153(Slc2a3),ENSMUSG00000019558(Slc6a8),ENSMUSG00000020368(Canx),ENSMUSG00000020598(Nrcam),ENSMUSG00000020689(Itgb3),ENSMUSG00000022494(Shisa9),ENSMUSG00000024873(Cnih2),ENSMUSG00000025161(Slc16a3),ENSMUSG00000025496(Drd4),ENSMUSG00000027273(Snap25),ENSMUSG00000030096(Slc6a6),ENSMUSG00000031119(Gpc4),ENSMUSG00000031217(Efnb1),ENSMUSG00000032012(Nectin1),EN…	ENSMUSG00000003378(Grik5),ENSMUSG00000003934(Efnb3),ENSMUSG00000005089(Slc1a2),ENSMUSG00000007653(Gabrb2),ENSMUSG00000013236(Ptprs),ENSMUSG00000015476(Prrt1),ENSMUSG00000015968(Cacna1d),ENSMUSG00000020102(Slc16a7),ENSMUSG00000020431(Adcy1),ENSMUSG00000020524(Gria1),ENSMUSG00000020787(P2rx1),ENSMUSG00000020838(Slc6a4),ENSMUSG00000021719(Rgs7bp),ENSMUSG00000022758(P2rx6),ENSMUSG00000024211(Grm8),EN…
BP	GO:0008284	positive regulation of cell proliferation	181	165	346	1008	2.2e-15	1.95382e-13	ENSMUSG00000000001(Gnai3),ENSMUSG00000000791(Il12rb1),ENSMUSG00000000817(Fasl),ENSMUSG00000001131(Timp1),ENSMUSG00000001517(Foxm1),ENSMUSG00000001642(Akr1b3),ENSMUSG00000002250(Ppard),ENSMUSG00000002603(Tgfb1),ENSMUSG00000003814(Calr),ENSMUSG00000004371(Il11),ENSMUSG00000004473(Clec11a),ENSMUSG00000004508(Gab2),ENSMUSG00000004709(Cd244a),ENSMUSG00000004791(Pgf),ENSMUSG00000005148(Klf5),ENSMUSG000…	ENSMUSG00000000120(Ngfr),ENSMUSG00000000184(Ccnd2),ENSMUSG00000000320(Alox12),ENSMUSG00000000567(Sox9),ENSMUSG00000000732(Icosl),ENSMUSG00000000869(Il4),ENSMUSG00000001249(Hpn),ENSMUSG00000001435(Col18a1),ENSMUSG00000003282(Plag1),ENSMUSG00000003882(Il7r),ENSMUSG00000004231(Pax2),ENSMUSG00000005320(Fgfr4),ENSMUSG00000005533(Igf1r),ENSMUSG00000005836(Gata6),ENSMUSG00000006538(Ihh),ENSMUSG000000072…
BP	GO:0001525	angiogenesis	119	82	201	515	2.2e-15	1.95382e-13	ENSMUSG00000000555(Itga5),ENSMUSG00000000628(Hk2),ENSMUSG00000000817(Fasl),ENSMUSG00000001098(Kctd10),ENSMUSG00000002944(Cd36),ENSMUSG00000003032(Klf4),ENSMUSG00000004328(Hif3a),ENSMUSG00000004791(Pgf),ENSMUSG00000004951(Hspb1),ENSMUSG00000005148(Klf5),ENSMUSG00000005413(Hmox1),ENSMUSG00000013076(Amotl1),ENSMUSG00000015468(Notch4),ENSMUSG00000016918(Sulf1),ENSMUSG00000018593(Sparc),ENSMUSG0000001…	ENSMUSG00000000120(Ngfr),ENSMUSG00000000392(Fap),ENSMUSG00000000753(Serpinf1),ENSMUSG00000000957(Mmp14),ENSMUSG00000001435(Col18a1),ENSMUSG00000002289(Angptl4),ENSMUSG00000005836(Gata6),ENSMUSG00000005958(Ephb3),ENSMUSG00000006538(Ihh),ENSMUSG00000008461(Fut1),ENSMUSG00000008855(Hdac5),ENSMUSG00000015340(Cybb),ENSMUSG00000016128(Stard13),ENSMUSG00000017417(Plxdc1),ENSMUSG00000018983(E2f2),ENSMUSG…
BP	GO:0061448	connective tissue development	51	75	126	280	2.3e-15	2.03158e-13	ENSMUSG00000001131(Timp1),ENSMUSG00000002250(Ppard),ENSMUSG00000002565(Scin),ENSMUSG00000002603(Tgfb1),ENSMUSG00000006800(Sulf2),ENSMUSG00000016918(Sulf1),ENSMUSG00000017491(Rarb),ENSMUSG00000019997(Ccn2),ENSMUSG00000020484(Xbp1),ENSMUSG00000020583(Matn3),ENSMUSG00000020689(Itgb3),ENSMUSG00000020846(Rflnb),ENSMUSG00000020953(Coch),ENSMUSG00000021036(Sptlc2),ENSMUSG00000021318(Gli3),ENSMUSG0000002…	ENSMUSG00000000126(Wnt9a),ENSMUSG00000000142(Axin2),ENSMUSG00000000567(Sox9),ENSMUSG00000001119(Col6a1),ENSMUSG00000002384(Bmp8b),ENSMUSG00000005087(Cd44),ENSMUSG00000006538(Ihh),ENSMUSG00000007279(Scube2),ENSMUSG00000008575(Nfib),ENSMUSG00000008999(Bmp7),ENSMUSG00000018340(Anxa6),ENSMUSG00000020241(Col6a2),ENSMUSG00000021367(Edn1),ENSMUSG00000021379(Id4),ENSMUSG00000021464(Ror2),ENSMUSG000000214…
MF	GO:0048018	receptor ligand activity	109	91	200	509	2.4e-15	2.10852e-13	ENSMUSG00000000817(Fasl),ENSMUSG00000001131(Timp1),ENSMUSG00000001227(Sema6b),ENSMUSG00000002603(Tgfb1),ENSMUSG00000004371(Il11),ENSMUSG00000004473(Clec11a),ENSMUSG00000004791(Pgf),ENSMUSG00000005891(Prl4a1),ENSMUSG00000005892(Trh),ENSMUSG00000006488(Prl7a1),ENSMUSG00000006490(Prl8a9),ENSMUSG00000012705(Retn),ENSMUSG00000015812(Gnrh1),ENSMUSG00000017064(Prl5a1),ENSMUSG00000017311(Pyy),ENSMUSG0000…	ENSMUSG00000000126(Wnt9a),ENSMUSG00000000627(Sema4f),ENSMUSG00000000869(Il4),ENSMUSG00000001334(Fndc5),ENSMUSG00000001741(Il16),ENSMUSG00000002384(Bmp8b),ENSMUSG00000005705(Agrp),ENSMUSG00000005824(Tnfsf14),ENSMUSG00000008999(Bmp7),ENSMUSG00000010797(Wnt2),ENSMUSG00000018238(Gdf9),ENSMUSG00000018752(Tnfsfm13),ENSMUSG00000018920(Cxcl16),ENSMUSG00000018927(Ccl6),ENSMUSG00000020676(Ccl11),ENSMUSG000…
CC	GO:1902495	transmembrane transporter complex	49	90	139	319	3e-15	2.62155e-13	ENSMUSG00000000216(Scnn1g),ENSMUSG00000000560(Gabra2),ENSMUSG00000001260(Gabrg1),ENSMUSG00000004113(Cacna1b),ENSMUSG00000006216(Clcnkb),ENSMUSG00000015766(Eps8),ENSMUSG00000018770(Atp5g3),ENSMUSG00000020169(Best3),ENSMUSG00000020722(Cacng1),ENSMUSG00000021313(Ryr2),ENSMUSG00000021699(Pde4d),ENSMUSG00000021730(Hcn1),ENSMUSG00000022494(Shisa9),ENSMUSG00000023033(Scn8a),ENSMUSG00000023959(Clic5),ENS…	ENSMUSG00000000881(Dlg3),ENSMUSG00000001985(Grik3),ENSMUSG00000003352(Cacnb3),ENSMUSG00000003378(Grik5),ENSMUSG00000004110(Cacna1e),ENSMUSG00000004988(Fxyd4),ENSMUSG00000007107(Atp1a4),ENSMUSG00000007653(Gabrb2),ENSMUSG00000015968(Cacna1d),ENSMUSG00000017412(Cacnb4),ENSMUSG00000019787(Trdn),ENSMUSG00000020159(Gabrp),ENSMUSG00000020524(Gria1),ENSMUSG00000020866(Cacna1g),ENSMUSG00000020882(Cacnb1),…
BP	GO:0072507	divalent inorganic cation homeostasis	85	123	208	541	4.6e-15	3.99833e-13	ENSMUSG00000000817(Fasl),ENSMUSG00000002015(Bcap31),ENSMUSG00000002603(Tgfb1),ENSMUSG00000002944(Cd36),ENSMUSG00000003657(Calb2),ENSMUSG00000004113(Cacna1b),ENSMUSG00000006567(Atp7b),ENSMUSG00000012819(Cdh23),ENSMUSG00000017446(C1qtnf1),ENSMUSG00000020689(Itgb3),ENSMUSG00000020793(Galr2),ENSMUSG00000020937(Plcd3),ENSMUSG00000021143(Pacs2),ENSMUSG00000021194(Chga),ENSMUSG00000021313(Ryr2),ENSMUSG0…	ENSMUSG00000002985(Apoe),ENSMUSG00000003352(Cacnb3),ENSMUSG00000004035(Gstm7),ENSMUSG00000006930(Hap1),ENSMUSG00000007122(Casq1),ENSMUSG00000011008(Mcoln2),ENSMUSG00000015968(Cacna1d),ENSMUSG00000017412(Cacnb4),ENSMUSG00000017817(Jph2),ENSMUSG00000018340(Anxa6),ENSMUSG00000019787(Trdn),ENSMUSG00000020123(Avpr1a),ENSMUSG00000020524(Gria1),ENSMUSG00000020787(P2rx1),ENSMUSG00000020788(Atp2a3),ENSMUS…
BP	GO:0009968	negative regulation of signal transduction	178	206	384	1148	5e-15	4.32302e-13	ENSMUSG00000000001(Gnai3),ENSMUSG00000001098(Kctd10),ENSMUSG00000001507(Itga3),ENSMUSG00000001517(Foxm1),ENSMUSG00000003032(Klf4),ENSMUSG00000003814(Calr),ENSMUSG00000004951(Hspb1),ENSMUSG00000005161(Prdx2),ENSMUSG00000005413(Hmox1),ENSMUSG00000006205(Htra1),ENSMUSG00000006457(Actn3),ENSMUSG00000006800(Sulf2),ENSMUSG00000006958(Chrd),ENSMUSG00000007659(Bcl2l1),ENSMUSG00000009291(Pttg1ip),ENSMUSG0…	ENSMUSG00000000120(Ngfr),ENSMUSG00000000142(Axin2),ENSMUSG00000000567(Sox9),ENSMUSG00000000869(Il4),ENSMUSG00000000957(Mmp14),ENSMUSG00000001494(Sost),ENSMUSG00000001583(Tnk1),ENSMUSG00000001672(Marveld3),ENSMUSG00000001870(Ltbp1),ENSMUSG00000002032(Tmem25),ENSMUSG00000002459(Rgs20),ENSMUSG00000002985(Apoe),ENSMUSG00000003452(Bicd1),ENSMUSG00000004035(Gstm7),ENSMUSG00000004558(Ndrg2),ENSMUSG00000…
BP	GO:0007268	chemical synaptic transmission	84	167	251	685	5.2e-15	4.40276e-13	ENSMUSG00000000560(Gabra2),ENSMUSG00000001260(Gabrg1),ENSMUSG00000003200(Sh3gl1),ENSMUSG00000003657(Calb2),ENSMUSG00000004113(Cacna1b),ENSMUSG00000005672(Kit),ENSMUSG00000007659(Bcl2l1),ENSMUSG00000012705(Retn),ENSMUSG00000018500(Adora2b),ENSMUSG00000020077(Srgn),ENSMUSG00000020484(Xbp1),ENSMUSG00000021071(Trim9),ENSMUSG00000021259(Cyp46a1),ENSMUSG00000021596(Mctp1),ENSMUSG00000022494(Shisa9),ENS…	ENSMUSG00000000120(Ngfr),ENSMUSG00000000303(Cdh1),ENSMUSG00000001985(Grik3),ENSMUSG00000002032(Tmem25),ENSMUSG00000002104(Rapsn),ENSMUSG00000002985(Apoe),ENSMUSG00000003279(Dlgap1),ENSMUSG00000003352(Cacnb3),ENSMUSG00000003378(Grik5),ENSMUSG00000003411(Rab3b),ENSMUSG00000003872(Lin7b),ENSMUSG00000003934(Efnb3),ENSMUSG00000005360(Slc1a3),ENSMUSG00000006476(Nsmf),ENSMUSG00000006930(Hap1),ENSMUSG000…
BP	GO:0098916	anterograde trans-synaptic signaling	84	167	251	685	5.2e-15	4.40276e-13	ENSMUSG00000000560(Gabra2),ENSMUSG00000001260(Gabrg1),ENSMUSG00000003200(Sh3gl1),ENSMUSG00000003657(Calb2),ENSMUSG00000004113(Cacna1b),ENSMUSG00000005672(Kit),ENSMUSG00000007659(Bcl2l1),ENSMUSG00000012705(Retn),ENSMUSG00000018500(Adora2b),ENSMUSG00000020077(Srgn),ENSMUSG00000020484(Xbp1),ENSMUSG00000021071(Trim9),ENSMUSG00000021259(Cyp46a1),ENSMUSG00000021596(Mctp1),ENSMUSG00000022494(Shisa9),ENS…	ENSMUSG00000000120(Ngfr),ENSMUSG00000000303(Cdh1),ENSMUSG00000001985(Grik3),ENSMUSG00000002032(Tmem25),ENSMUSG00000002104(Rapsn),ENSMUSG00000002985(Apoe),ENSMUSG00000003279(Dlgap1),ENSMUSG00000003352(Cacnb3),ENSMUSG00000003378(Grik5),ENSMUSG00000003411(Rab3b),ENSMUSG00000003872(Lin7b),ENSMUSG00000003934(Efnb3),ENSMUSG00000005360(Slc1a3),ENSMUSG00000006476(Nsmf),ENSMUSG00000006930(Hap1),ENSMUSG000…
CC	GO:0044463	cell projection part	172	257	429	1305	5.2e-15	4.40276e-13	ENSMUSG00000000555(Itga5),ENSMUSG00000000560(Gabra2),ENSMUSG00000000805(Car4),ENSMUSG00000001098(Kctd10),ENSMUSG00000001260(Gabrg1),ENSMUSG00000001507(Itga3),ENSMUSG00000001642(Akr1b3),ENSMUSG00000001864(Aif1l),ENSMUSG00000002944(Cd36),ENSMUSG00000003657(Calb2),ENSMUSG00000004113(Cacna1b),ENSMUSG00000004849(Ap1s1),ENSMUSG00000004951(Hspb1),ENSMUSG00000006304(Arpc2),ENSMUSG00000006641(Slc5a6),ENSM…	ENSMUSG00000000120(Ngfr),ENSMUSG00000000392(Fap),ENSMUSG00000000416(Cttnbp2),ENSMUSG00000000753(Serpinf1),ENSMUSG00000000881(Dlg3),ENSMUSG00000000889(Dbh),ENSMUSG00000001985(Grik3),ENSMUSG00000003354(Ccdc65),ENSMUSG00000003378(Grik5),ENSMUSG00000004032(Gstm5),ENSMUSG00000004558(Ndrg2),ENSMUSG00000004631(Sgce),ENSMUSG00000005087(Cd44),ENSMUSG00000005089(Slc1a2),ENSMUSG00000005237(Dnah2),ENSMUSG000…
CC	GO:0120038	plasma membrane bounded cell projection part	172	257	429	1305	5.2e-15	4.40276e-13	ENSMUSG00000000555(Itga5),ENSMUSG00000000560(Gabra2),ENSMUSG00000000805(Car4),ENSMUSG00000001098(Kctd10),ENSMUSG00000001260(Gabrg1),ENSMUSG00000001507(Itga3),ENSMUSG00000001642(Akr1b3),ENSMUSG00000001864(Aif1l),ENSMUSG00000002944(Cd36),ENSMUSG00000003657(Calb2),ENSMUSG00000004113(Cacna1b),ENSMUSG00000004849(Ap1s1),ENSMUSG00000004951(Hspb1),ENSMUSG00000006304(Arpc2),ENSMUSG00000006641(Slc5a6),ENSM…	ENSMUSG00000000120(Ngfr),ENSMUSG00000000392(Fap),ENSMUSG00000000416(Cttnbp2),ENSMUSG00000000753(Serpinf1),ENSMUSG00000000881(Dlg3),ENSMUSG00000000889(Dbh),ENSMUSG00000001985(Grik3),ENSMUSG00000003354(Ccdc65),ENSMUSG00000003378(Grik5),ENSMUSG00000004032(Gstm5),ENSMUSG00000004558(Ndrg2),ENSMUSG00000004631(Sgce),ENSMUSG00000005087(Cd44),ENSMUSG00000005089(Slc1a2),ENSMUSG00000005237(Dnah2),ENSMUSG000…
BP	GO:0099537	trans-synaptic signaling	85	168	253	692	5.4e-15	4.54853e-13	ENSMUSG00000000560(Gabra2),ENSMUSG00000001260(Gabrg1),ENSMUSG00000003200(Sh3gl1),ENSMUSG00000003657(Calb2),ENSMUSG00000004113(Cacna1b),ENSMUSG00000005672(Kit),ENSMUSG00000007659(Bcl2l1),ENSMUSG00000012705(Retn),ENSMUSG00000018500(Adora2b),ENSMUSG00000020077(Srgn),ENSMUSG00000020484(Xbp1),ENSMUSG00000021071(Trim9),ENSMUSG00000021259(Cyp46a1),ENSMUSG00000021596(Mctp1),ENSMUSG00000022494(Shisa9),ENS…	ENSMUSG00000000120(Ngfr),ENSMUSG00000000303(Cdh1),ENSMUSG00000001985(Grik3),ENSMUSG00000002032(Tmem25),ENSMUSG00000002104(Rapsn),ENSMUSG00000002985(Apoe),ENSMUSG00000003279(Dlgap1),ENSMUSG00000003352(Cacnb3),ENSMUSG00000003378(Grik5),ENSMUSG00000003411(Rab3b),ENSMUSG00000003872(Lin7b),ENSMUSG00000003934(Efnb3),ENSMUSG00000005360(Slc1a3),ENSMUSG00000006476(Nsmf),ENSMUSG00000006930(Hap1),ENSMUSG000…
CC	GO:0030425	dendrite	98	174	272	754	5.5e-15	4.609e-13	ENSMUSG00000000560(Gabra2),ENSMUSG00000001260(Gabrg1),ENSMUSG00000003657(Calb2),ENSMUSG00000004031(Brinp2),ENSMUSG00000004113(Cacna1b),ENSMUSG00000004951(Hspb1),ENSMUSG00000006304(Arpc2),ENSMUSG00000013415(Igf2bp1),ENSMUSG00000015812(Gnrh1),ENSMUSG00000017697(Ada),ENSMUSG00000020326(Ccng1),ENSMUSG00000020368(Canx),ENSMUSG00000020907(Rcvrn),ENSMUSG00000021068(Nin),ENSMUSG00000021071(Trim9),ENSMUSG…	ENSMUSG00000000120(Ngfr),ENSMUSG00000000416(Cttnbp2),ENSMUSG00000000627(Sema4f),ENSMUSG00000000881(Dlg3),ENSMUSG00000000889(Dbh),ENSMUSG00000001270(Ckb),ENSMUSG00000001870(Ltbp1),ENSMUSG00000001985(Grik3),ENSMUSG00000002985(Apoe),ENSMUSG00000003378(Grik5),ENSMUSG00000004631(Sgce),ENSMUSG00000005089(Slc1a2),ENSMUSG00000005360(Slc1a3),ENSMUSG00000005958(Ephb3),ENSMUSG00000006476(Nsmf),ENSMUSG000000…
BP	GO:0060047	heart contraction	43	59	102	214	1.1e-14	9.17097e-13	ENSMUSG00000004113(Cacna1b),ENSMUSG00000017697(Ada),ENSMUSG00000018932(Map2k3),ENSMUSG00000019997(Ccn2),ENSMUSG00000020184(Mdm2),ENSMUSG00000021194(Chga),ENSMUSG00000021313(Ryr2),ENSMUSG00000021699(Pde4d),ENSMUSG00000024065(Ehd3),ENSMUSG00000024140(Epas1),ENSMUSG00000025880(Smad7),ENSMUSG00000026313(Hdac4),ENSMUSG00000026360(Rgs2),ENSMUSG00000026418(Tnni1),ENSMUSG00000027488(Snta1),ENSMUSG0000002…	ENSMUSG00000006576(Slc4a3),ENSMUSG00000007877(Tcap),ENSMUSG00000011751(Sptbn4),ENSMUSG00000015968(Cacna1d),ENSMUSG00000019787(Trdn),ENSMUSG00000019789(Hey2),ENSMUSG00000020123(Avpr1a),ENSMUSG00000020439(Smtn),ENSMUSG00000020866(Cacna1g),ENSMUSG00000021367(Edn1),ENSMUSG00000021779(Thrb),ENSMUSG00000022803(Popdc2),ENSMUSG00000022865(Cxadr),ENSMUSG00000024027(Glp1r),ENSMUSG00000024935(Slc1a1),ENSMUS…
BP	GO:0042592	homeostatic process	272	289	561	1801	1.2e-14	9.95391e-13	ENSMUSG00000000216(Scnn1g),ENSMUSG00000000628(Hk2),ENSMUSG00000000805(Car4),ENSMUSG00000000817(Fasl),ENSMUSG00000001403(Ube2c),ENSMUSG00000001642(Akr1b3),ENSMUSG00000002015(Bcap31),ENSMUSG00000002204(Napsa),ENSMUSG00000002603(Tgfb1),ENSMUSG00000002944(Cd36),ENSMUSG00000003657(Calb2),ENSMUSG00000004113(Cacna1b),ENSMUSG00000004383(Large1),ENSMUSG00000005057(Sh2b2),ENSMUSG00000005161(Prdx2),ENSMUSG0…	ENSMUSG00000000120(Ngfr),ENSMUSG00000000320(Alox12),ENSMUSG00000000567(Sox9),ENSMUSG00000000690(Hoxb6),ENSMUSG00000000753(Serpinf1),ENSMUSG00000000889(Dbh),ENSMUSG00000001247(Lsr),ENSMUSG00000001249(Hpn),ENSMUSG00000001270(Ckb),ENSMUSG00000001420(Tmem79),ENSMUSG00000002289(Angptl4),ENSMUSG00000002384(Bmp8b),ENSMUSG00000002985(Apoe),ENSMUSG00000003352(Cacnb3),ENSMUSG00000003378(Grik5),ENSMUSG00000…
BP	GO:0099536	synaptic signaling	85	169	254	700	1.3e-14	1.07289e-12	ENSMUSG00000000560(Gabra2),ENSMUSG00000001260(Gabrg1),ENSMUSG00000003200(Sh3gl1),ENSMUSG00000003657(Calb2),ENSMUSG00000004113(Cacna1b),ENSMUSG00000005672(Kit),ENSMUSG00000007659(Bcl2l1),ENSMUSG00000012705(Retn),ENSMUSG00000018500(Adora2b),ENSMUSG00000020077(Srgn),ENSMUSG00000020484(Xbp1),ENSMUSG00000021071(Trim9),ENSMUSG00000021259(Cyp46a1),ENSMUSG00000021596(Mctp1),ENSMUSG00000022494(Shisa9),ENS…	ENSMUSG00000000120(Ngfr),ENSMUSG00000000303(Cdh1),ENSMUSG00000001985(Grik3),ENSMUSG00000002032(Tmem25),ENSMUSG00000002104(Rapsn),ENSMUSG00000002985(Apoe),ENSMUSG00000003279(Dlgap1),ENSMUSG00000003352(Cacnb3),ENSMUSG00000003378(Grik5),ENSMUSG00000003411(Rab3b),ENSMUSG00000003872(Lin7b),ENSMUSG00000003934(Efnb3),ENSMUSG00000005360(Slc1a3),ENSMUSG00000006476(Nsmf),ENSMUSG00000006930(Hap1),ENSMUSG000…
BP	GO:0048812	neuron projection morphogenesis	90	145	235	636	1.4e-14	1.13254e-12	ENSMUSG00000000305(Cdh4),ENSMUSG00000001227(Sema6b),ENSMUSG00000001627(Ifrd1),ENSMUSG00000004151(Etv1),ENSMUSG00000004885(Crabp2),ENSMUSG00000015619(Gata3),ENSMUSG00000017929(B4galt5),ENSMUSG00000019970(Sgk1),ENSMUSG00000020099(Unc5b),ENSMUSG00000020340(Cyfip2),ENSMUSG00000020598(Nrcam),ENSMUSG00000021068(Nin),ENSMUSG00000021318(Gli3),ENSMUSG00000021702(Thbs4),ENSMUSG00000021728(Emb),ENSMUSG00000…	ENSMUSG00000000120(Ngfr),ENSMUSG00000000627(Sema4f),ENSMUSG00000000861(Bcl11a),ENSMUSG00000002985(Apoe),ENSMUSG00000003934(Efnb3),ENSMUSG00000005958(Ephb3),ENSMUSG00000006476(Nsmf),ENSMUSG00000007989(Fzd3),ENSMUSG00000008575(Nfib),ENSMUSG00000008999(Bmp7),ENSMUSG00000011751(Sptbn4),ENSMUSG00000013236(Ptprs),ENSMUSG00000014602(Kif1a),ENSMUSG00000014704(Hoxa2),ENSMUSG00000015222(Map2),ENSMUSG000000…
BP	GO:0048858	cell projection morphogenesis	93	147	240	653	1.4e-14	1.13254e-12	ENSMUSG00000000305(Cdh4),ENSMUSG00000001227(Sema6b),ENSMUSG00000001627(Ifrd1),ENSMUSG00000004151(Etv1),ENSMUSG00000004885(Crabp2),ENSMUSG00000015619(Gata3),ENSMUSG00000015745(Plekho1),ENSMUSG00000017929(B4galt5),ENSMUSG00000019970(Sgk1),ENSMUSG00000020099(Unc5b),ENSMUSG00000020340(Cyfip2),ENSMUSG00000020598(Nrcam),ENSMUSG00000020689(Itgb3),ENSMUSG00000021068(Nin),ENSMUSG00000021318(Gli3),ENSMUSG0…	ENSMUSG00000000120(Ngfr),ENSMUSG00000000627(Sema4f),ENSMUSG00000000861(Bcl11a),ENSMUSG00000002985(Apoe),ENSMUSG00000003934(Efnb3),ENSMUSG00000005087(Cd44),ENSMUSG00000005958(Ephb3),ENSMUSG00000006476(Nsmf),ENSMUSG00000007989(Fzd3),ENSMUSG00000008575(Nfib),ENSMUSG00000008999(Bmp7),ENSMUSG00000011751(Sptbn4),ENSMUSG00000013236(Ptprs),ENSMUSG00000014602(Kif1a),ENSMUSG00000014704(Hoxa2),ENSMUSG000000…
BP	GO:0006875	cellular metal ion homeostasis	99	127	226	606	1.4e-14	1.13254e-12	ENSMUSG00000000817(Fasl),ENSMUSG00000002015(Bcap31),ENSMUSG00000002603(Tgfb1),ENSMUSG00000002944(Cd36),ENSMUSG00000003657(Calb2),ENSMUSG00000004113(Cacna1b),ENSMUSG00000005413(Hmox1),ENSMUSG00000006567(Atp7b),ENSMUSG00000012819(Cdh23),ENSMUSG00000017446(C1qtnf1),ENSMUSG00000018585(Atox1),ENSMUSG00000019970(Sgk1),ENSMUSG00000020689(Itgb3),ENSMUSG00000020793(Galr2),ENSMUSG00000020937(Plcd3),ENSMUSG…	ENSMUSG00000002985(Apoe),ENSMUSG00000003352(Cacnb3),ENSMUSG00000004035(Gstm7),ENSMUSG00000006930(Hap1),ENSMUSG00000007107(Atp1a4),ENSMUSG00000007122(Casq1),ENSMUSG00000011008(Mcoln2),ENSMUSG00000015968(Cacna1d),ENSMUSG00000017412(Cacnb4),ENSMUSG00000017817(Jph2),ENSMUSG00000018340(Anxa6),ENSMUSG00000019787(Trdn),ENSMUSG00000020123(Avpr1a),ENSMUSG00000020524(Gria1),ENSMUSG00000020787(P2rx1),ENSMUS…
CC	GO:0099699	integral component of synaptic membrane	24	77	101	211	1.4e-14	1.13254e-12	ENSMUSG00000000560(Gabra2),ENSMUSG00000003153(Slc2a3),ENSMUSG00000019558(Slc6a8),ENSMUSG00000020368(Canx),ENSMUSG00000020598(Nrcam),ENSMUSG00000020689(Itgb3),ENSMUSG00000022494(Shisa9),ENSMUSG00000024873(Cnih2),ENSMUSG00000025161(Slc16a3),ENSMUSG00000025496(Drd4),ENSMUSG00000030096(Slc6a6),ENSMUSG00000031217(Efnb1),ENSMUSG00000032012(Nectin1),ENSMUSG00000035566(Pcdh17),ENSMUSG00000039579(Grin3a),…	ENSMUSG00000003378(Grik5),ENSMUSG00000003934(Efnb3),ENSMUSG00000005089(Slc1a2),ENSMUSG00000007653(Gabrb2),ENSMUSG00000013236(Ptprs),ENSMUSG00000015476(Prrt1),ENSMUSG00000015968(Cacna1d),ENSMUSG00000020102(Slc16a7),ENSMUSG00000020431(Adcy1),ENSMUSG00000020524(Gria1),ENSMUSG00000020787(P2rx1),ENSMUSG00000020838(Slc6a4),ENSMUSG00000022758(P2rx6),ENSMUSG00000024211(Grm8),ENSMUSG00000024304(Cdh2),ENSM…
BP	GO:0006874	cellular calcium ion homeostasis	76	117	193	497	1.5e-14	1.20154e-12	ENSMUSG00000000817(Fasl),ENSMUSG00000002015(Bcap31),ENSMUSG00000002603(Tgfb1),ENSMUSG00000002944(Cd36),ENSMUSG00000003657(Calb2),ENSMUSG00000004113(Cacna1b),ENSMUSG00000006567(Atp7b),ENSMUSG00000012819(Cdh23),ENSMUSG00000017446(C1qtnf1),ENSMUSG00000020689(Itgb3),ENSMUSG00000020793(Galr2),ENSMUSG00000020937(Plcd3),ENSMUSG00000021143(Pacs2),ENSMUSG00000021194(Chga),ENSMUSG00000021313(Ryr2),ENSMUSG0…	ENSMUSG00000002985(Apoe),ENSMUSG00000003352(Cacnb3),ENSMUSG00000004035(Gstm7),ENSMUSG00000006930(Hap1),ENSMUSG00000007122(Casq1),ENSMUSG00000011008(Mcoln2),ENSMUSG00000015968(Cacna1d),ENSMUSG00000017412(Cacnb4),ENSMUSG00000017817(Jph2),ENSMUSG00000018340(Anxa6),ENSMUSG00000019787(Trdn),ENSMUSG00000020123(Avpr1a),ENSMUSG00000020524(Gria1),ENSMUSG00000020787(P2rx1),ENSMUSG00000020788(Atp2a3),ENSMUS…
BP	GO:0120039	plasma membrane bounded cell projection morphogenesis	92	147	239	650	1.5e-14	1.20154e-12	ENSMUSG00000000305(Cdh4),ENSMUSG00000001227(Sema6b),ENSMUSG00000001627(Ifrd1),ENSMUSG00000004151(Etv1),ENSMUSG00000004885(Crabp2),ENSMUSG00000015619(Gata3),ENSMUSG00000015745(Plekho1),ENSMUSG00000017929(B4galt5),ENSMUSG00000019970(Sgk1),ENSMUSG00000020099(Unc5b),ENSMUSG00000020340(Cyfip2),ENSMUSG00000020598(Nrcam),ENSMUSG00000021068(Nin),ENSMUSG00000021318(Gli3),ENSMUSG00000021702(Thbs4),ENSMUSG0…	ENSMUSG00000000120(Ngfr),ENSMUSG00000000627(Sema4f),ENSMUSG00000000861(Bcl11a),ENSMUSG00000002985(Apoe),ENSMUSG00000003934(Efnb3),ENSMUSG00000005087(Cd44),ENSMUSG00000005958(Ephb3),ENSMUSG00000006476(Nsmf),ENSMUSG00000007989(Fzd3),ENSMUSG00000008575(Nfib),ENSMUSG00000008999(Bmp7),ENSMUSG00000011751(Sptbn4),ENSMUSG00000013236(Ptprs),ENSMUSG00000014602(Kif1a),ENSMUSG00000014704(Hoxa2),ENSMUSG000000…
BP	GO:0010817	regulation of hormone levels	105	97	202	527	1.6e-14	1.2692e-12	ENSMUSG00000000792(Slc5a5),ENSMUSG00000001642(Akr1b3),ENSMUSG00000002250(Ppard),ENSMUSG00000004371(Il11),ENSMUSG00000004885(Crabp2),ENSMUSG00000005220(Corin),ENSMUSG00000005892(Trh),ENSMUSG00000012705(Retn),ENSMUSG00000015134(Aldh1a3),ENSMUSG00000015619(Gata3),ENSMUSG00000017446(C1qtnf1),ENSMUSG00000017716(Birc5),ENSMUSG00000017950(Hnf4a),ENSMUSG00000019301(Hsd17b1),ENSMUSG00000020097(Sgpl1),ENSM…	ENSMUSG00000001249(Hpn),ENSMUSG00000001865(Cpa3),ENSMUSG00000004347(Pde1c),ENSMUSG00000007682(Dio2),ENSMUSG00000014453(Blk),ENSMUSG00000015968(Cacna1d),ENSMUSG00000018238(Gdf9),ENSMUSG00000019762(Iyd),ENSMUSG00000020131(Pcsk4),ENSMUSG00000020673(Tpo),ENSMUSG00000020684(Rasl10b),ENSMUSG00000020847(Rph3al),ENSMUSG00000020848(Doc2b),ENSMUSG00000020889(Nr1d1),ENSMUSG00000020919(Stat5b),ENSMUSG0000002…
BP	GO:0043062	extracellular structure organization	52	64	116	256	1.6e-14	1.2692e-12	ENSMUSG00000002603(Tgfb1),ENSMUSG00000003665(Has1),ENSMUSG00000004894(Hapln2),ENSMUSG00000006529(Itih1),ENSMUSG00000006800(Sulf2),ENSMUSG00000006948(Klk4),ENSMUSG00000016918(Sulf1),ENSMUSG00000019997(Ccn2),ENSMUSG00000020689(Itgb3),ENSMUSG00000021831(Ero1l),ENSMUSG00000022018(Rgcc),ENSMUSG00000022371(Col14a1),ENSMUSG00000024087(Cyp1b1),ENSMUSG00000024529(Lox),ENSMUSG00000025185(Loxl4),ENSMUSG0000…	ENSMUSG00000000392(Fap),ENSMUSG00000000402(Egfl6),ENSMUSG00000000567(Sox9),ENSMUSG00000000901(Mmp11),ENSMUSG00000000957(Mmp14),ENSMUSG00000001249(Hpn),ENSMUSG00000001435(Col18a1),ENSMUSG00000003051(Elf3),ENSMUSG00000005320(Fgfr4),ENSMUSG00000006538(Ihh),ENSMUSG00000010342(Tex14),ENSMUSG00000017344(Vtn),ENSMUSG00000018830(Myh11),ENSMUSG00000020019(Ntn4),ENSMUSG00000020932(Gfap),ENSMUSG00000022225(…
BP	GO:0098742	cell-cell adhesion via plasma-membrane adhesion molecules	40	79	119	265	1.7e-14	1.34201e-12	ENSMUSG00000000305(Cdh4),ENSMUSG00000000325(Arvcf),ENSMUSG00000000555(Itga5),ENSMUSG00000003032(Klf4),ENSMUSG00000012819(Cdh23),ENSMUSG00000020598(Nrcam),ENSMUSG00000020717(Pecam1),ENSMUSG00000021728(Emb),ENSMUSG00000021803(Cdhr1),ENSMUSG00000022132(Cldn10),ENSMUSG00000022790(Igsf11),ENSMUSG00000023473(Celsr3),ENSMUSG00000024471(Myot),ENSMUSG00000025497(Cdhr5),ENSMUSG00000026580(Selp),ENSMUSG0000…	ENSMUSG00000000303(Cdh1),ENSMUSG00000006411(Nectin4),ENSMUSG00000013236(Ptprs),ENSMUSG00000016150(Tenm1),ENSMUSG00000018569(Cldn7),ENSMUSG00000022865(Cxadr),ENSMUSG00000024304(Cdh2),ENSMUSG00000028399(Ptprd),ENSMUSG00000028519(Dab1),ENSMUSG00000029309(Sparcl1),ENSMUSG00000032021(Crtam),ENSMUSG00000032076(Cadm1),ENSMUSG00000032452(Clstn2),ENSMUSG00000032595(Cdhr4),ENSMUSG00000033295(Ptprf),ENSMUSG…
MF	GO:0043169	cation binding	509	644	1153	4061	1.8e-14	1.40066e-12	ENSMUSG00000000001(Gnai3),ENSMUSG00000000088(Cox5a),ENSMUSG00000000305(Cdh4),ENSMUSG00000000420(Galnt1),ENSMUSG00000000555(Itga5),ENSMUSG00000000805(Car4),ENSMUSG00000001020(S100a4),ENSMUSG00000001021(S100a3),ENSMUSG00000001023(S100a5),ENSMUSG00000001025(S100a6),ENSMUSG00000001131(Timp1),ENSMUSG00000001467(Cyp51),ENSMUSG00000001588(Acap1),ENSMUSG00000001773(Folh1),ENSMUSG00000001864(Aif1l),ENSMUS…	ENSMUSG00000000253(Gmpr),ENSMUSG00000000303(Cdh1),ENSMUSG00000000320(Alox12),ENSMUSG00000000402(Egfl6),ENSMUSG00000000730(Dnmt3l),ENSMUSG00000000731(Aire),ENSMUSG00000000861(Bcl11a),ENSMUSG00000000889(Dbh),ENSMUSG00000000901(Mmp11),ENSMUSG00000000957(Mmp14),ENSMUSG00000001435(Col18a1),ENSMUSG00000001508(Sgca),ENSMUSG00000001604(Tcea3),ENSMUSG00000001865(Cpa3),ENSMUSG00000001870(Ltbp1),ENSMUSG0000…
BP	GO:0016310	phosphorylation	329	354	683	2263	1.8e-14	1.40066e-12	ENSMUSG00000000088(Cox5a),ENSMUSG00000000555(Itga5),ENSMUSG00000000628(Hk2),ENSMUSG00000000708(Kat2b),ENSMUSG00000000791(Il12rb1),ENSMUSG00000001517(Foxm1),ENSMUSG00000002603(Tgfb1),ENSMUSG00000002944(Cd36),ENSMUSG00000003032(Klf4),ENSMUSG00000003752(Itpkc),ENSMUSG00000004207(Psap),ENSMUSG00000004371(Il11),ENSMUSG00000004791(Pgf),ENSMUSG00000004951(Hspb1),ENSMUSG00000005161(Prdx2),ENSMUSG00000005…	ENSMUSG00000000120(Ngfr),ENSMUSG00000000142(Axin2),ENSMUSG00000000184(Ccnd2),ENSMUSG00000000308(Ckmt1),ENSMUSG00000000567(Sox9),ENSMUSG00000000869(Il4),ENSMUSG00000000881(Dlg3),ENSMUSG00000001270(Ckb),ENSMUSG00000001583(Tnk1),ENSMUSG00000001672(Marveld3),ENSMUSG00000002007(Srpk3),ENSMUSG00000002012(Pnck),ENSMUSG00000002384(Bmp8b),ENSMUSG00000002985(Apoe),ENSMUSG00000003948(Mmd),ENSMUSG00000004085…
CC	GO:0016324	apical plasma membrane	72	79	151	362	1.8e-14	1.40066e-12	ENSMUSG00000000216(Scnn1g),ENSMUSG00000000594(Gm2a),ENSMUSG00000000805(Car4),ENSMUSG00000002944(Cd36),ENSMUSG00000006273(Atp6v1b2),ENSMUSG00000010095(Slc3a2),ENSMUSG00000013076(Amotl1),ENSMUSG00000017309(Cd300lg),ENSMUSG00000017716(Birc5),ENSMUSG00000018900(Slc22a5),ENSMUSG00000019210(Atp6v1e1),ENSMUSG00000019278(Dpep1),ENSMUSG00000020062(Slc5a8),ENSMUSG00000020689(Itgb3),ENSMUSG00000021335(Slc17…	ENSMUSG00000000154(Slc22a18),ENSMUSG00000001249(Hpn),ENSMUSG00000003352(Cacnb3),ENSMUSG00000003484(Cyp4f18),ENSMUSG00000005087(Cd44),ENSMUSG00000007034(Slc44a4),ENSMUSG00000007989(Fzd3),ENSMUSG00000015968(Cacna1d),ENSMUSG00000018340(Anxa6),ENSMUSG00000019989(Enpp3),ENSMUSG00000021636(Marveld2),ENSMUSG00000021638(Ocln),ENSMUSG00000022297(Fzd6),ENSMUSG00000022505(Emp2),ENSMUSG00000023259(Slc26a6),E…
BP	GO:0051216	cartilage development	40	59	99	207	2.1e-14	1.62636e-12	ENSMUSG00000001131(Timp1),ENSMUSG00000002565(Scin),ENSMUSG00000002603(Tgfb1),ENSMUSG00000006800(Sulf2),ENSMUSG00000016918(Sulf1),ENSMUSG00000017491(Rarb),ENSMUSG00000019997(Ccn2),ENSMUSG00000020583(Matn3),ENSMUSG00000020846(Rflnb),ENSMUSG00000020953(Coch),ENSMUSG00000021318(Gli3),ENSMUSG00000022025(Cnmd),ENSMUSG00000022094(Slc39a14),ENSMUSG00000022371(Col14a1),ENSMUSG00000022996(Wnt10b),ENSMUSG00…	ENSMUSG00000000126(Wnt9a),ENSMUSG00000000142(Axin2),ENSMUSG00000000567(Sox9),ENSMUSG00000001119(Col6a1),ENSMUSG00000002384(Bmp8b),ENSMUSG00000005087(Cd44),ENSMUSG00000006538(Ihh),ENSMUSG00000007279(Scube2),ENSMUSG00000008575(Nfib),ENSMUSG00000008999(Bmp7),ENSMUSG00000018340(Anxa6),ENSMUSG00000020241(Col6a2),ENSMUSG00000021367(Edn1),ENSMUSG00000021464(Ror2),ENSMUSG00000021469(Msx2),ENSMUSG00000021…
CC	GO:0034702	ion channel complex	44	83	127	289	2.2e-14	1.69576e-12	ENSMUSG00000000216(Scnn1g),ENSMUSG00000000560(Gabra2),ENSMUSG00000001260(Gabrg1),ENSMUSG00000004113(Cacna1b),ENSMUSG00000006216(Clcnkb),ENSMUSG00000015766(Eps8),ENSMUSG00000018770(Atp5g3),ENSMUSG00000020169(Best3),ENSMUSG00000020722(Cacng1),ENSMUSG00000021313(Ryr2),ENSMUSG00000021699(Pde4d),ENSMUSG00000021730(Hcn1),ENSMUSG00000022494(Shisa9),ENSMUSG00000023033(Scn8a),ENSMUSG00000023959(Clic5),ENS…	ENSMUSG00000000881(Dlg3),ENSMUSG00000001985(Grik3),ENSMUSG00000003352(Cacnb3),ENSMUSG00000003378(Grik5),ENSMUSG00000004110(Cacna1e),ENSMUSG00000007653(Gabrb2),ENSMUSG00000015968(Cacna1d),ENSMUSG00000017412(Cacnb4),ENSMUSG00000019787(Trdn),ENSMUSG00000020159(Gabrp),ENSMUSG00000020524(Gria1),ENSMUSG00000020866(Cacna1g),ENSMUSG00000020882(Cacnb1),ENSMUSG00000022949(Clic6),ENSMUSG00000024112(Cacna1h)…
BP	GO:0030198	extracellular matrix organization	52	63	115	254	2.3e-14	1.75628e-12	ENSMUSG00000002603(Tgfb1),ENSMUSG00000003665(Has1),ENSMUSG00000004894(Hapln2),ENSMUSG00000006529(Itih1),ENSMUSG00000006800(Sulf2),ENSMUSG00000006948(Klk4),ENSMUSG00000016918(Sulf1),ENSMUSG00000019997(Ccn2),ENSMUSG00000020689(Itgb3),ENSMUSG00000021831(Ero1l),ENSMUSG00000022018(Rgcc),ENSMUSG00000022371(Col14a1),ENSMUSG00000024087(Cyp1b1),ENSMUSG00000024529(Lox),ENSMUSG00000025185(Loxl4),ENSMUSG0000…	ENSMUSG00000000392(Fap),ENSMUSG00000000402(Egfl6),ENSMUSG00000000567(Sox9),ENSMUSG00000000901(Mmp11),ENSMUSG00000000957(Mmp14),ENSMUSG00000001249(Hpn),ENSMUSG00000001435(Col18a1),ENSMUSG00000003051(Elf3),ENSMUSG00000005320(Fgfr4),ENSMUSG00000006538(Ihh),ENSMUSG00000017344(Vtn),ENSMUSG00000018830(Myh11),ENSMUSG00000020019(Ntn4),ENSMUSG00000020932(Gfap),ENSMUSG00000022225(Cma1),ENSMUSG00000022665(C…
BP	GO:0044706	multi-multicellular organism process	78	37	115	254	2.3e-14	1.75628e-12	ENSMUSG00000000555(Itga5),ENSMUSG00000001131(Timp1),ENSMUSG00000001507(Itga3),ENSMUSG00000001642(Akr1b3),ENSMUSG00000002250(Ppard),ENSMUSG00000002603(Tgfb1),ENSMUSG00000003814(Calr),ENSMUSG00000004791(Pgf),ENSMUSG00000005220(Corin),ENSMUSG00000005891(Prl4a1),ENSMUSG00000006488(Prl7a1),ENSMUSG00000006490(Prl8a9),ENSMUSG00000010064(Slc38a3),ENSMUSG00000013629(Cad),ENSMUSG00000015533(Itga2),ENSMUSG0…	ENSMUSG00000005705(Agrp),ENSMUSG00000006538(Ihh),ENSMUSG00000014846(Tppp3),ENSMUSG00000020123(Avpr1a),ENSMUSG00000020758(Itgb4),ENSMUSG00000020787(P2rx1),ENSMUSG00000020838(Slc6a4),ENSMUSG00000020919(Stat5b),ENSMUSG00000021367(Edn1),ENSMUSG00000022505(Emp2),ENSMUSG00000024039(Cbs),ENSMUSG00000025194(Abcc2),ENSMUSG00000028370(Pappa),ENSMUSG00000028476(Reck),ENSMUSG00000030359(Pzp),ENSMUSG000000316…
BP	GO:0006873	cellular ion homeostasis	109	138	247	680	2.7e-14	2.04263e-12	ENSMUSG00000000817(Fasl),ENSMUSG00000002015(Bcap31),ENSMUSG00000002603(Tgfb1),ENSMUSG00000002944(Cd36),ENSMUSG00000003657(Calb2),ENSMUSG00000004113(Cacna1b),ENSMUSG00000005413(Hmox1),ENSMUSG00000006567(Atp7b),ENSMUSG00000006574(Slc4a1),ENSMUSG00000012819(Cdh23),ENSMUSG00000014077(Chp1),ENSMUSG00000017446(C1qtnf1),ENSMUSG00000018585(Atox1),ENSMUSG00000019970(Sgk1),ENSMUSG00000020689(Itgb3),ENSMUSG…	ENSMUSG00000001270(Ckb),ENSMUSG00000002985(Apoe),ENSMUSG00000003352(Cacnb3),ENSMUSG00000004035(Gstm7),ENSMUSG00000006576(Slc4a3),ENSMUSG00000006930(Hap1),ENSMUSG00000007107(Atp1a4),ENSMUSG00000007122(Casq1),ENSMUSG00000011008(Mcoln2),ENSMUSG00000015968(Cacna1d),ENSMUSG00000017412(Cacnb4),ENSMUSG00000017817(Jph2),ENSMUSG00000018340(Anxa6),ENSMUSG00000019787(Trdn),ENSMUSG00000020123(Avpr1a),ENSMUSG…
BP	GO:0035295	tube development	109	130	239	653	2.7e-14	2.04263e-12	ENSMUSG00000001504(Irx2),ENSMUSG00000001507(Itga3),ENSMUSG00000001642(Akr1b3),ENSMUSG00000002603(Tgfb1),ENSMUSG00000004791(Pgf),ENSMUSG00000005148(Klf5),ENSMUSG00000005672(Kit),ENSMUSG00000015468(Notch4),ENSMUSG00000015619(Gata3),ENSMUSG00000015647(Lama5),ENSMUSG00000016194(Hsd11b1),ENSMUSG00000017491(Rarb),ENSMUSG00000017697(Ada),ENSMUSG00000018593(Sparc),ENSMUSG00000018822(Sfrp5),ENSMUSG0000001…	ENSMUSG00000000320(Alox12),ENSMUSG00000000567(Sox9),ENSMUSG00000000782(Tcf7),ENSMUSG00000000957(Mmp14),ENSMUSG00000002324(Rec8),ENSMUSG00000004231(Pax2),ENSMUSG00000005836(Gata6),ENSMUSG00000005958(Ephb3),ENSMUSG00000006538(Ihh),ENSMUSG00000007877(Tcap),ENSMUSG00000007989(Fzd3),ENSMUSG00000008575(Nfib),ENSMUSG00000008999(Bmp7),ENSMUSG00000009376(Met),ENSMUSG00000010797(Wnt2),ENSMUSG00000013089(Et…
CC	GO:0098793	presynapse	87	138	225	604	2.9e-14	2.18382e-12	ENSMUSG00000000560(Gabra2),ENSMUSG00000002957(Ap2a2),ENSMUSG00000003153(Slc2a3),ENSMUSG00000003200(Sh3gl1),ENSMUSG00000003657(Calb2),ENSMUSG00000004113(Cacna1b),ENSMUSG00000004849(Ap1s1),ENSMUSG00000006304(Arpc2),ENSMUSG00000007659(Bcl2l1),ENSMUSG00000013629(Cad),ENSMUSG00000015533(Itga2),ENSMUSG00000015812(Gnrh1),ENSMUSG00000019890(Nts),ENSMUSG00000020182(Ddc),ENSMUSG00000020368(Canx),ENSMUSG000…	ENSMUSG00000000416(Cttnbp2),ENSMUSG00000000889(Dbh),ENSMUSG00000001985(Grik3),ENSMUSG00000003378(Grik5),ENSMUSG00000003411(Rab3b),ENSMUSG00000003872(Lin7b),ENSMUSG00000003934(Efnb3),ENSMUSG00000005089(Slc1a2),ENSMUSG00000006930(Hap1),ENSMUSG00000007989(Fzd3),ENSMUSG00000009394(Syn2),ENSMUSG00000010086(Rnf112),ENSMUSG00000013236(Ptprs),ENSMUSG00000014602(Kif1a),ENSMUSG00000015968(Cacna1d),ENSMUSG0…
BP	GO:0030003	cellular cation homeostasis	108	135	243	667	3e-14	2.24876e-12	ENSMUSG00000000817(Fasl),ENSMUSG00000002015(Bcap31),ENSMUSG00000002603(Tgfb1),ENSMUSG00000002944(Cd36),ENSMUSG00000003657(Calb2),ENSMUSG00000004113(Cacna1b),ENSMUSG00000005413(Hmox1),ENSMUSG00000006567(Atp7b),ENSMUSG00000006574(Slc4a1),ENSMUSG00000012819(Cdh23),ENSMUSG00000014077(Chp1),ENSMUSG00000017446(C1qtnf1),ENSMUSG00000018585(Atox1),ENSMUSG00000019970(Sgk1),ENSMUSG00000020689(Itgb3),ENSMUSG…	ENSMUSG00000002985(Apoe),ENSMUSG00000003352(Cacnb3),ENSMUSG00000004035(Gstm7),ENSMUSG00000006576(Slc4a3),ENSMUSG00000006930(Hap1),ENSMUSG00000007107(Atp1a4),ENSMUSG00000007122(Casq1),ENSMUSG00000011008(Mcoln2),ENSMUSG00000015968(Cacna1d),ENSMUSG00000017412(Cacnb4),ENSMUSG00000017817(Jph2),ENSMUSG00000018340(Anxa6),ENSMUSG00000019787(Trdn),ENSMUSG00000020123(Avpr1a),ENSMUSG00000020524(Gria1),ENSMU…
MF	GO:0022832	voltage-gated channel activity	33	59	92	187	3.1e-14	2.31311e-12	ENSMUSG00000004113(Cacna1b),ENSMUSG00000006216(Clcnkb),ENSMUSG00000018470(Kcnab3),ENSMUSG00000020722(Cacng1),ENSMUSG00000021730(Hcn1),ENSMUSG00000023033(Scn8a),ENSMUSG00000023959(Clic5),ENSMUSG00000027273(Snap25),ENSMUSG00000028931(Kcnab2),ENSMUSG00000031075(Ano1),ENSMUSG00000032338(Hcn4),ENSMUSG00000032511(Scn5a),ENSMUSG00000033770(Clcnka),ENSMUSG00000036083(Slc17a3),ENSMUSG00000037242(Clic4),EN…	ENSMUSG00000003352(Cacnb3),ENSMUSG00000004110(Cacna1e),ENSMUSG00000009246(Trpm5),ENSMUSG00000015340(Cybb),ENSMUSG00000015968(Cacna1d),ENSMUSG00000017412(Cacnb4),ENSMUSG00000020866(Cacna1g),ENSMUSG00000020882(Cacnb1),ENSMUSG00000022949(Clic6),ENSMUSG00000024112(Cacna1h),ENSMUSG00000025221(Kcnip2),ENSMUSG00000026961(Lrrc26),ENSMUSG00000027827(Kcnab1),ENSMUSG00000027895(Kcnc4),ENSMUSG00000028631(Kcn…
CC	GO:1990351	transporter complex	49	90	139	327	3.3e-14	2.45115e-12	ENSMUSG00000000216(Scnn1g),ENSMUSG00000000560(Gabra2),ENSMUSG00000001260(Gabrg1),ENSMUSG00000004113(Cacna1b),ENSMUSG00000006216(Clcnkb),ENSMUSG00000015766(Eps8),ENSMUSG00000018770(Atp5g3),ENSMUSG00000020169(Best3),ENSMUSG00000020722(Cacng1),ENSMUSG00000021313(Ryr2),ENSMUSG00000021699(Pde4d),ENSMUSG00000021730(Hcn1),ENSMUSG00000022494(Shisa9),ENSMUSG00000023033(Scn8a),ENSMUSG00000023959(Clic5),ENS…	ENSMUSG00000000881(Dlg3),ENSMUSG00000001985(Grik3),ENSMUSG00000003352(Cacnb3),ENSMUSG00000003378(Grik5),ENSMUSG00000004110(Cacna1e),ENSMUSG00000004988(Fxyd4),ENSMUSG00000007107(Atp1a4),ENSMUSG00000007653(Gabrb2),ENSMUSG00000015968(Cacna1d),ENSMUSG00000017412(Cacnb4),ENSMUSG00000019787(Trdn),ENSMUSG00000020159(Gabrp),ENSMUSG00000020524(Gria1),ENSMUSG00000020866(Cacna1g),ENSMUSG00000020882(Cacnb1),…
BP	GO:0050804	modulation of chemical synaptic transmission	71	122	193	501	3.6e-14	2.66188e-12	ENSMUSG00000003200(Sh3gl1),ENSMUSG00000003657(Calb2),ENSMUSG00000004113(Cacna1b),ENSMUSG00000005672(Kit),ENSMUSG00000007659(Bcl2l1),ENSMUSG00000012705(Retn),ENSMUSG00000018500(Adora2b),ENSMUSG00000020077(Srgn),ENSMUSG00000021259(Cyp46a1),ENSMUSG00000021596(Mctp1),ENSMUSG00000022494(Shisa9),ENSMUSG00000022602(Arc),ENSMUSG00000022790(Igsf11),ENSMUSG00000024868(Dkk1),ENSMUSG00000024873(Cnih2),ENSMUS…	ENSMUSG00000000120(Ngfr),ENSMUSG00000000303(Cdh1),ENSMUSG00000001985(Grik3),ENSMUSG00000002032(Tmem25),ENSMUSG00000002104(Rapsn),ENSMUSG00000002985(Apoe),ENSMUSG00000003352(Cacnb3),ENSMUSG00000003378(Grik5),ENSMUSG00000003411(Rab3b),ENSMUSG00000003934(Efnb3),ENSMUSG00000005360(Slc1a3),ENSMUSG00000006476(Nsmf),ENSMUSG00000006930(Hap1),ENSMUSG00000013236(Ptprs),ENSMUSG00000015968(Cacna1d),ENSMUSG00…
BP	GO:0098771	inorganic ion homeostasis	118	152	270	761	4.1e-14	3.01793e-12	ENSMUSG00000000216(Scnn1g),ENSMUSG00000000805(Car4),ENSMUSG00000000817(Fasl),ENSMUSG00000002015(Bcap31),ENSMUSG00000002603(Tgfb1),ENSMUSG00000002944(Cd36),ENSMUSG00000003657(Calb2),ENSMUSG00000004113(Cacna1b),ENSMUSG00000005220(Corin),ENSMUSG00000005413(Hmox1),ENSMUSG00000006567(Atp7b),ENSMUSG00000006574(Slc4a1),ENSMUSG00000012819(Cdh23),ENSMUSG00000014077(Chp1),ENSMUSG00000017446(C1qtnf1),ENSMUS…	ENSMUSG00000001270(Ckb),ENSMUSG00000002985(Apoe),ENSMUSG00000003352(Cacnb3),ENSMUSG00000004035(Gstm7),ENSMUSG00000006576(Slc4a3),ENSMUSG00000006930(Hap1),ENSMUSG00000007107(Atp1a4),ENSMUSG00000007122(Casq1),ENSMUSG00000011008(Mcoln2),ENSMUSG00000015968(Cacna1d),ENSMUSG00000017412(Cacnb4),ENSMUSG00000017817(Jph2),ENSMUSG00000018340(Anxa6),ENSMUSG00000019787(Trdn),ENSMUSG00000020123(Avpr1a),ENSMUSG…
BP	GO:0034762	regulation of transmembrane transport	70	117	187	482	4.2e-14	3.07768e-12	ENSMUSG00000002603(Tgfb1),ENSMUSG00000004113(Cacna1b),ENSMUSG00000006216(Clcnkb),ENSMUSG00000009687(Fxyd5),ENSMUSG00000014077(Chp1),ENSMUSG00000017400(Stac2),ENSMUSG00000020689(Itgb3),ENSMUSG00000020722(Cacng1),ENSMUSG00000020793(Galr2),ENSMUSG00000021313(Ryr2),ENSMUSG00000021591(Glrx),ENSMUSG00000021699(Pde4d),ENSMUSG00000021730(Hcn1),ENSMUSG00000022494(Shisa9),ENSMUSG00000022602(Arc),ENSMUSG000…	ENSMUSG00000003352(Cacnb3),ENSMUSG00000004035(Gstm7),ENSMUSG00000004110(Cacna1e),ENSMUSG00000004988(Fxyd4),ENSMUSG00000006930(Hap1),ENSMUSG00000007122(Casq1),ENSMUSG00000009246(Trpm5),ENSMUSG00000015340(Cybb),ENSMUSG00000015968(Cacna1d),ENSMUSG00000017412(Cacnb4),ENSMUSG00000017817(Jph2),ENSMUSG00000019787(Trdn),ENSMUSG00000019933(Mrln),ENSMUSG00000020155(Kcnmb1),ENSMUSG00000020333(Acsl6),ENSMUSG…
CC	GO:0044432	endoplasmic reticulum part	218	140	358	1066	4.3e-14	3.13689e-12	ENSMUSG00000000001(Gnai3),ENSMUSG00000001467(Cyp51),ENSMUSG00000002014(Ssr4),ENSMUSG00000002015(Bcap31),ENSMUSG00000003814(Calr),ENSMUSG00000004460(Dnajb11),ENSMUSG00000005413(Hmox1),ENSMUSG00000005973(Rcn1),ENSMUSG00000009092(Derl3),ENSMUSG00000009905(Kdsr),ENSMUSG00000010025(Aldh3a2),ENSMUSG00000014867(Surf4),ENSMUSG00000014905(Dnajb9),ENSMUSG00000015812(Gnrh1),ENSMUSG00000016194(Hsd11b1),ENSMU…	ENSMUSG00000001249(Hpn),ENSMUSG00000003484(Cyp4f18),ENSMUSG00000006675(P4htm),ENSMUSG00000007122(Casq1),ENSMUSG00000007908(Hmgcll1),ENSMUSG00000012187(Mogat1),ENSMUSG00000015340(Cybb),ENSMUSG00000017344(Vtn),ENSMUSG00000017817(Jph2),ENSMUSG00000019787(Trdn),ENSMUSG00000019933(Mrln),ENSMUSG00000020023(Tmcc3),ENSMUSG00000020131(Pcsk4),ENSMUSG00000020333(Acsl6),ENSMUSG00000020524(Gria1),ENSMUSG00000…
BP	GO:0012501	programmed cell death	309	281	590	1921	4.5e-14	3.2682e-12	ENSMUSG00000000001(Gnai3),ENSMUSG00000000555(Itga5),ENSMUSG00000000628(Hk2),ENSMUSG00000000817(Fasl),ENSMUSG00000001131(Timp1),ENSMUSG00000001642(Akr1b3),ENSMUSG00000001773(Folh1),ENSMUSG00000002015(Bcap31),ENSMUSG00000002250(Ppard),ENSMUSG00000002565(Scin),ENSMUSG00000002603(Tgfb1),ENSMUSG00000003032(Klf4),ENSMUSG00000003541(Ier3),ENSMUSG00000004328(Hif3a),ENSMUSG00000004535(Tax1bp1),ENSMUSG0000…	ENSMUSG00000000120(Ngfr),ENSMUSG00000000126(Wnt9a),ENSMUSG00000000184(Ccnd2),ENSMUSG00000000308(Ckmt1),ENSMUSG00000000320(Alox12),ENSMUSG00000000392(Fap),ENSMUSG00000000567(Sox9),ENSMUSG00000000782(Tcf7),ENSMUSG00000000869(Il4),ENSMUSG00000000889(Dbh),ENSMUSG00000001249(Hpn),ENSMUSG00000001420(Tmem79),ENSMUSG00000001435(Col18a1),ENSMUSG00000002104(Rapsn),ENSMUSG00000002289(Angptl4),ENSMUSG0000000…
BP	GO:0001501	skeletal system development	91	104	195	509	4.9e-14	3.54296e-12	ENSMUSG00000001131(Timp1),ENSMUSG00000002565(Scin),ENSMUSG00000002603(Tgfb1),ENSMUSG00000004894(Hapln2),ENSMUSG00000005672(Kit),ENSMUSG00000006457(Actn3),ENSMUSG00000006800(Sulf2),ENSMUSG00000006958(Chrd),ENSMUSG00000007594(Hapln4),ENSMUSG00000014030(Pax5),ENSMUSG00000016918(Sulf1),ENSMUSG00000017491(Rarb),ENSMUSG00000018593(Sparc),ENSMUSG00000019301(Hsd17b1),ENSMUSG00000019997(Ccn2),ENSMUSG00000…	ENSMUSG00000000126(Wnt9a),ENSMUSG00000000142(Axin2),ENSMUSG00000000567(Sox9),ENSMUSG00000000690(Hoxb6),ENSMUSG00000000957(Mmp14),ENSMUSG00000001119(Col6a1),ENSMUSG00000001656(Hoxc11),ENSMUSG00000001657(Hoxc8),ENSMUSG00000001661(Hoxc6),ENSMUSG00000002384(Bmp8b),ENSMUSG00000005087(Cd44),ENSMUSG00000006538(Ihh),ENSMUSG00000007279(Scube2),ENSMUSG00000008575(Nfib),ENSMUSG00000008999(Bmp7),ENSMUSG00000…
BP	GO:0006820	anion transport	117	105	222	599	5.2e-14	3.72689e-12	ENSMUSG00000000560(Gabra2),ENSMUSG00000000792(Slc5a5),ENSMUSG00000000805(Car4),ENSMUSG00000001095(Slc13a2),ENSMUSG00000001260(Gabrg1),ENSMUSG00000002250(Ppard),ENSMUSG00000002944(Cd36),ENSMUSG00000003153(Slc2a3),ENSMUSG00000004207(Psap),ENSMUSG00000005892(Trh),ENSMUSG00000006216(Clcnkb),ENSMUSG00000006574(Slc4a1),ENSMUSG00000006641(Slc5a6),ENSMUSG00000009646(Pla2g12b),ENSMUSG00000010064(Slc38a3),…	ENSMUSG00000002346(Slc25a42),ENSMUSG00000002985(Apoe),ENSMUSG00000003484(Cyp4f18),ENSMUSG00000005089(Slc1a2),ENSMUSG00000005360(Slc1a3),ENSMUSG00000006576(Slc4a3),ENSMUSG00000007034(Slc44a4),ENSMUSG00000007653(Gabrb2),ENSMUSG00000009378(Slc16a12),ENSMUSG00000011486(Slc25a41),ENSMUSG00000017412(Cacnb4),ENSMUSG00000017754(Pltp),ENSMUSG00000019893(Ros1),ENSMUSG00000019894(Slc6a15),ENSMUSG00000020102…
CC	GO:0031410	cytoplasmic vesicle	293	279	572	1848	5.2e-14	3.72689e-12	ENSMUSG00000000001(Gnai3),ENSMUSG00000000555(Itga5),ENSMUSG00000000560(Gabra2),ENSMUSG00000000805(Car4),ENSMUSG00000000817(Fasl),ENSMUSG00000001424(Snd1),ENSMUSG00000001588(Acap1),ENSMUSG00000002015(Bcap31),ENSMUSG00000002204(Napsa),ENSMUSG00000002233(Rhoc),ENSMUSG00000002603(Tgfb1),ENSMUSG00000002847(Pla1a),ENSMUSG00000002957(Ap2a2),ENSMUSG00000003153(Slc2a3),ENSMUSG00000003200(Sh3gl1),ENSMUSG00…	ENSMUSG00000000120(Ngfr),ENSMUSG00000000157(Itgb2l),ENSMUSG00000000416(Cttnbp2),ENSMUSG00000000753(Serpinf1),ENSMUSG00000000889(Dbh),ENSMUSG00000000957(Mmp14),ENSMUSG00000001672(Marveld3),ENSMUSG00000001865(Cpa3),ENSMUSG00000002032(Tmem25),ENSMUSG00000002985(Apoe),ENSMUSG00000003309(Ap1m2),ENSMUSG00000003379(Cd79a),ENSMUSG00000003411(Rab3b),ENSMUSG00000003452(Bicd1),ENSMUSG00000003948(Mmd),ENSMUS…
BP	GO:0006468	protein phosphorylation	268	314	582	1893	5.6e-14	3.97868e-12	ENSMUSG00000000555(Itga5),ENSMUSG00000000708(Kat2b),ENSMUSG00000000791(Il12rb1),ENSMUSG00000001517(Foxm1),ENSMUSG00000002603(Tgfb1),ENSMUSG00000002944(Cd36),ENSMUSG00000003032(Klf4),ENSMUSG00000004207(Psap),ENSMUSG00000004371(Il11),ENSMUSG00000004791(Pgf),ENSMUSG00000004951(Hspb1),ENSMUSG00000005161(Prdx2),ENSMUSG00000005268(Prlr),ENSMUSG00000005640(Insrr),ENSMUSG00000005672(Kit),ENSMUSG000000097…	ENSMUSG00000000120(Ngfr),ENSMUSG00000000142(Axin2),ENSMUSG00000000184(Ccnd2),ENSMUSG00000000567(Sox9),ENSMUSG00000000869(Il4),ENSMUSG00000000881(Dlg3),ENSMUSG00000001583(Tnk1),ENSMUSG00000001672(Marveld3),ENSMUSG00000002007(Srpk3),ENSMUSG00000002012(Pnck),ENSMUSG00000002384(Bmp8b),ENSMUSG00000002985(Apoe),ENSMUSG00000003948(Mmd),ENSMUSG00000004085(Map3k20),ENSMUSG00000004558(Ndrg2),ENSMUSG0000000…
BP	GO:0034765	regulation of ion transmembrane transport	68	114	182	467	5.6e-14	3.97868e-12	ENSMUSG00000002603(Tgfb1),ENSMUSG00000004113(Cacna1b),ENSMUSG00000006216(Clcnkb),ENSMUSG00000009687(Fxyd5),ENSMUSG00000014077(Chp1),ENSMUSG00000017400(Stac2),ENSMUSG00000020689(Itgb3),ENSMUSG00000020722(Cacng1),ENSMUSG00000020793(Galr2),ENSMUSG00000021313(Ryr2),ENSMUSG00000021591(Glrx),ENSMUSG00000021699(Pde4d),ENSMUSG00000021730(Hcn1),ENSMUSG00000022494(Shisa9),ENSMUSG00000022602(Arc),ENSMUSG000…	ENSMUSG00000003352(Cacnb3),ENSMUSG00000004035(Gstm7),ENSMUSG00000004110(Cacna1e),ENSMUSG00000004988(Fxyd4),ENSMUSG00000006930(Hap1),ENSMUSG00000007122(Casq1),ENSMUSG00000009246(Trpm5),ENSMUSG00000015340(Cybb),ENSMUSG00000015968(Cacna1d),ENSMUSG00000017412(Cacnb4),ENSMUSG00000017817(Jph2),ENSMUSG00000019787(Trdn),ENSMUSG00000019933(Mrln),ENSMUSG00000020155(Kcnmb1),ENSMUSG00000020333(Acsl6),ENSMUSG…
BP	GO:0055074	calcium ion homeostasis	77	118	195	510	6.2e-14	4.3859e-12	ENSMUSG00000000817(Fasl),ENSMUSG00000002015(Bcap31),ENSMUSG00000002603(Tgfb1),ENSMUSG00000002944(Cd36),ENSMUSG00000003657(Calb2),ENSMUSG00000004113(Cacna1b),ENSMUSG00000006567(Atp7b),ENSMUSG00000012819(Cdh23),ENSMUSG00000017446(C1qtnf1),ENSMUSG00000020689(Itgb3),ENSMUSG00000020793(Galr2),ENSMUSG00000020937(Plcd3),ENSMUSG00000021143(Pacs2),ENSMUSG00000021194(Chga),ENSMUSG00000021313(Ryr2),ENSMUSG0…	ENSMUSG00000002985(Apoe),ENSMUSG00000003352(Cacnb3),ENSMUSG00000004035(Gstm7),ENSMUSG00000006930(Hap1),ENSMUSG00000007122(Casq1),ENSMUSG00000011008(Mcoln2),ENSMUSG00000015968(Cacna1d),ENSMUSG00000017412(Cacnb4),ENSMUSG00000017817(Jph2),ENSMUSG00000018340(Anxa6),ENSMUSG00000019787(Trdn),ENSMUSG00000020123(Avpr1a),ENSMUSG00000020524(Gria1),ENSMUSG00000020787(P2rx1),ENSMUSG00000020788(Atp2a3),ENSMUS…
MF	GO:0005244	voltage-gated ion channel activity	33	58	91	186	6.4e-14	4.50786e-12	ENSMUSG00000004113(Cacna1b),ENSMUSG00000006216(Clcnkb),ENSMUSG00000018470(Kcnab3),ENSMUSG00000020722(Cacng1),ENSMUSG00000021730(Hcn1),ENSMUSG00000023033(Scn8a),ENSMUSG00000023959(Clic5),ENSMUSG00000027273(Snap25),ENSMUSG00000028931(Kcnab2),ENSMUSG00000031075(Ano1),ENSMUSG00000032338(Hcn4),ENSMUSG00000032511(Scn5a),ENSMUSG00000033770(Clcnka),ENSMUSG00000036083(Slc17a3),ENSMUSG00000037242(Clic4),EN…	ENSMUSG00000003352(Cacnb3),ENSMUSG00000004110(Cacna1e),ENSMUSG00000009246(Trpm5),ENSMUSG00000015340(Cybb),ENSMUSG00000015968(Cacna1d),ENSMUSG00000017412(Cacnb4),ENSMUSG00000020866(Cacna1g),ENSMUSG00000020882(Cacnb1),ENSMUSG00000022949(Clic6),ENSMUSG00000024112(Cacna1h),ENSMUSG00000025221(Kcnip2),ENSMUSG00000026961(Lrrc26),ENSMUSG00000027827(Kcnab1),ENSMUSG00000027895(Kcnc4),ENSMUSG00000028631(Kcn…
BP	GO:0002009	morphogenesis of an epithelium	75	121	196	514	7.2e-14	5.04958e-12	ENSMUSG00000000216(Scnn1g),ENSMUSG00000000555(Itga5),ENSMUSG00000001504(Irx2),ENSMUSG00000002233(Rhoc),ENSMUSG00000002603(Tgfb1),ENSMUSG00000003032(Klf4),ENSMUSG00000004791(Pgf),ENSMUSG00000015134(Aldh1a3),ENSMUSG00000015468(Notch4),ENSMUSG00000015619(Gata3),ENSMUSG00000015647(Lama5),ENSMUSG00000016918(Sulf1),ENSMUSG00000019979(Apaf1),ENSMUSG00000020170(Frs2),ENSMUSG00000021313(Ryr2),ENSMUSG00000…	ENSMUSG00000000120(Ngfr),ENSMUSG00000000320(Alox12),ENSMUSG00000000567(Sox9),ENSMUSG00000000731(Aire),ENSMUSG00000000881(Dlg3),ENSMUSG00000000957(Mmp14),ENSMUSG00000001420(Tmem79),ENSMUSG00000004231(Pax2),ENSMUSG00000005087(Cd44),ENSMUSG00000005251(Ripk4),ENSMUSG00000006538(Ihh),ENSMUSG00000007877(Tcap),ENSMUSG00000007989(Fzd3),ENSMUSG00000008999(Bmp7),ENSMUSG00000009376(Met),ENSMUSG00000010797(W…
BP	GO:0051174	regulation of phosphorus metabolic process	257	300	557	1802	7.3e-14	5.09783e-12	ENSMUSG00000000555(Itga5),ENSMUSG00000000708(Kat2b),ENSMUSG00000001517(Foxm1),ENSMUSG00000002603(Tgfb1),ENSMUSG00000002944(Cd36),ENSMUSG00000003032(Klf4),ENSMUSG00000004207(Psap),ENSMUSG00000004371(Il11),ENSMUSG00000004709(Cd244a),ENSMUSG00000004791(Pgf),ENSMUSG00000004951(Hspb1),ENSMUSG00000005161(Prdx2),ENSMUSG00000005268(Prlr),ENSMUSG00000005640(Insrr),ENSMUSG00000005672(Kit),ENSMUSG0000000645…	ENSMUSG00000000120(Ngfr),ENSMUSG00000000142(Axin2),ENSMUSG00000000184(Ccnd2),ENSMUSG00000000567(Sox9),ENSMUSG00000000869(Il4),ENSMUSG00000000881(Dlg3),ENSMUSG00000001249(Hpn),ENSMUSG00000001672(Marveld3),ENSMUSG00000002384(Bmp8b),ENSMUSG00000002985(Apoe),ENSMUSG00000003948(Mmd),ENSMUSG00000004085(Map3k20),ENSMUSG00000004558(Ndrg2),ENSMUSG00000005087(Cd44),ENSMUSG00000005320(Fgfr4),ENSMUSG00000005…
BP	GO:0007565	female pregnancy	74	30	104	225	7.6e-14	5.28475e-12	ENSMUSG00000000555(Itga5),ENSMUSG00000001131(Timp1),ENSMUSG00000001507(Itga3),ENSMUSG00000001642(Akr1b3),ENSMUSG00000002250(Ppard),ENSMUSG00000002603(Tgfb1),ENSMUSG00000003814(Calr),ENSMUSG00000004791(Pgf),ENSMUSG00000005220(Corin),ENSMUSG00000005891(Prl4a1),ENSMUSG00000006488(Prl7a1),ENSMUSG00000006490(Prl8a9),ENSMUSG00000010064(Slc38a3),ENSMUSG00000013629(Cad),ENSMUSG00000015533(Itga2),ENSMUSG0…	ENSMUSG00000005705(Agrp),ENSMUSG00000006538(Ihh),ENSMUSG00000014846(Tppp3),ENSMUSG00000020758(Itgb4),ENSMUSG00000020919(Stat5b),ENSMUSG00000022505(Emp2),ENSMUSG00000024039(Cbs),ENSMUSG00000025194(Abcc2),ENSMUSG00000028370(Pappa),ENSMUSG00000028476(Reck),ENSMUSG00000030359(Pzp),ENSMUSG00000031613(Hpgd),ENSMUSG00000031659(Adcy7),ENSMUSG00000031891(Hsd11b2),ENSMUSG00000034394(Lif),ENSMUSG00000034758…
CC	GO:0044425	membrane part	957	1184	2141	8094	7.7e-14	5.3091e-12	ENSMUSG00000000001(Gnai3),ENSMUSG00000000088(Cox5a),ENSMUSG00000000216(Scnn1g),ENSMUSG00000000305(Cdh4),ENSMUSG00000000420(Galnt1),ENSMUSG00000000555(Itga5),ENSMUSG00000000560(Gabra2),ENSMUSG00000000594(Gm2a),ENSMUSG00000000706(Btn1a1),ENSMUSG00000000791(Il12rb1),ENSMUSG00000000792(Slc5a5),ENSMUSG00000000805(Car4),ENSMUSG00000000817(Fasl),ENSMUSG00000001025(S100a6),ENSMUSG00000001029(Icam2),ENSMU…	ENSMUSG00000000120(Ngfr),ENSMUSG00000000154(Slc22a18),ENSMUSG00000000157(Itgb2l),ENSMUSG00000000159(Igsf5),ENSMUSG00000000303(Cdh1),ENSMUSG00000000308(Ckmt1),ENSMUSG00000000385(Tmprss2),ENSMUSG00000000392(Fap),ENSMUSG00000000562(Adora3),ENSMUSG00000000627(Sema4f),ENSMUSG00000000732(Icosl),ENSMUSG00000000794(Kcnn3),ENSMUSG00000000869(Il4),ENSMUSG00000000881(Dlg3),ENSMUSG00000000889(Dbh),ENSMUSG000…
CC	GO:0098978	glutamatergic synapse	53	130	183	470	7.7e-14	5.3091e-12	ENSMUSG00000003153(Slc2a3),ENSMUSG00000003200(Sh3gl1),ENSMUSG00000004113(Cacna1b),ENSMUSG00000005125(Ndrg1),ENSMUSG00000006304(Arpc2),ENSMUSG00000015766(Eps8),ENSMUSG00000018500(Adora2b),ENSMUSG00000018593(Sparc),ENSMUSG00000019558(Slc6a8),ENSMUSG00000020077(Srgn),ENSMUSG00000020315(Sptbn1),ENSMUSG00000020368(Canx),ENSMUSG00000020598(Nrcam),ENSMUSG00000020689(Itgb3),ENSMUSG00000022494(Shisa9),ENS…	ENSMUSG00000000303(Cdh1),ENSMUSG00000000416(Cttnbp2),ENSMUSG00000000881(Dlg3),ENSMUSG00000001985(Grik3),ENSMUSG00000002985(Apoe),ENSMUSG00000003279(Dlgap1),ENSMUSG00000003378(Grik5),ENSMUSG00000003934(Efnb3),ENSMUSG00000004558(Ndrg2),ENSMUSG00000005089(Slc1a2),ENSMUSG00000006476(Nsmf),ENSMUSG00000009394(Syn2),ENSMUSG00000013236(Ptprs),ENSMUSG00000015476(Prrt1),ENSMUSG00000017412(Cacnb4),ENSMUSG00…
CC	GO:0097708	intracellular vesicle	293	279	572	1852	8.1e-14	5.56143e-12	ENSMUSG00000000001(Gnai3),ENSMUSG00000000555(Itga5),ENSMUSG00000000560(Gabra2),ENSMUSG00000000805(Car4),ENSMUSG00000000817(Fasl),ENSMUSG00000001424(Snd1),ENSMUSG00000001588(Acap1),ENSMUSG00000002015(Bcap31),ENSMUSG00000002204(Napsa),ENSMUSG00000002233(Rhoc),ENSMUSG00000002603(Tgfb1),ENSMUSG00000002847(Pla1a),ENSMUSG00000002957(Ap2a2),ENSMUSG00000003153(Slc2a3),ENSMUSG00000003200(Sh3gl1),ENSMUSG00…	ENSMUSG00000000120(Ngfr),ENSMUSG00000000157(Itgb2l),ENSMUSG00000000416(Cttnbp2),ENSMUSG00000000753(Serpinf1),ENSMUSG00000000889(Dbh),ENSMUSG00000000957(Mmp14),ENSMUSG00000001672(Marveld3),ENSMUSG00000001865(Cpa3),ENSMUSG00000002032(Tmem25),ENSMUSG00000002985(Apoe),ENSMUSG00000003309(Ap1m2),ENSMUSG00000003379(Cd79a),ENSMUSG00000003411(Rab3b),ENSMUSG00000003452(Bicd1),ENSMUSG00000003948(Mmd),ENSMUS…
BP	GO:0051046	regulation of secretion	151	154	305	887	8.5e-14	5.81165e-12	ENSMUSG00000000706(Btn1a1),ENSMUSG00000001467(Cyp51),ENSMUSG00000002250(Ppard),ENSMUSG00000002603(Tgfb1),ENSMUSG00000002944(Cd36),ENSMUSG00000004113(Cacna1b),ENSMUSG00000004371(Il11),ENSMUSG00000004709(Cd244a),ENSMUSG00000005220(Corin),ENSMUSG00000005413(Hmox1),ENSMUSG00000005891(Prl4a1),ENSMUSG00000005892(Trh),ENSMUSG00000006488(Prl7a1),ENSMUSG00000006490(Prl8a9),ENSMUSG00000007659(Bcl2l1),ENSMU…	ENSMUSG00000000869(Il4),ENSMUSG00000000903(Vpreb3),ENSMUSG00000001741(Il16),ENSMUSG00000002985(Apoe),ENSMUSG00000003378(Grik5),ENSMUSG00000003411(Rab3b),ENSMUSG00000003484(Cyp4f18),ENSMUSG00000004347(Pde1c),ENSMUSG00000006930(Hap1),ENSMUSG00000014453(Blk),ENSMUSG00000015568(Lpl),ENSMUSG00000015966(Il17rb),ENSMUSG00000015968(Cacna1d),ENSMUSG00000017412(Cacnb4),ENSMUSG00000017978(Cadps2),ENSMUSG000…
BP	GO:0032990	cell part morphogenesis	97	149	246	683	8.9e-14	6.05979e-12	ENSMUSG00000000305(Cdh4),ENSMUSG00000001227(Sema6b),ENSMUSG00000001627(Ifrd1),ENSMUSG00000004151(Etv1),ENSMUSG00000004885(Crabp2),ENSMUSG00000007659(Bcl2l1),ENSMUSG00000015619(Gata3),ENSMUSG00000015745(Plekho1),ENSMUSG00000017929(B4galt5),ENSMUSG00000019970(Sgk1),ENSMUSG00000020099(Unc5b),ENSMUSG00000020340(Cyfip2),ENSMUSG00000020464(Pnpt1),ENSMUSG00000020598(Nrcam),ENSMUSG00000020689(Itgb3),ENSM…	ENSMUSG00000000120(Ngfr),ENSMUSG00000000627(Sema4f),ENSMUSG00000000861(Bcl11a),ENSMUSG00000002985(Apoe),ENSMUSG00000003934(Efnb3),ENSMUSG00000005087(Cd44),ENSMUSG00000005958(Ephb3),ENSMUSG00000006476(Nsmf),ENSMUSG00000007989(Fzd3),ENSMUSG00000008575(Nfib),ENSMUSG00000008999(Bmp7),ENSMUSG00000011751(Sptbn4),ENSMUSG00000013236(Ptprs),ENSMUSG00000014602(Kif1a),ENSMUSG00000014704(Hoxa2),ENSMUSG000000…
CC	GO:0034703	cation channel complex	34	67	101	216	9e-14	6.10245e-12	ENSMUSG00000000216(Scnn1g),ENSMUSG00000004113(Cacna1b),ENSMUSG00000015766(Eps8),ENSMUSG00000018770(Atp5g3),ENSMUSG00000020722(Cacng1),ENSMUSG00000021313(Ryr2),ENSMUSG00000021699(Pde4d),ENSMUSG00000021730(Hcn1),ENSMUSG00000022494(Shisa9),ENSMUSG00000023033(Scn8a),ENSMUSG00000024873(Cnih2),ENSMUSG00000027273(Snap25),ENSMUSG00000028931(Kcnab2),ENSMUSG00000031078(Cttn),ENSMUSG00000032172(Olfm2),ENSMU…	ENSMUSG00000000881(Dlg3),ENSMUSG00000001985(Grik3),ENSMUSG00000003352(Cacnb3),ENSMUSG00000003378(Grik5),ENSMUSG00000004110(Cacna1e),ENSMUSG00000015968(Cacna1d),ENSMUSG00000017412(Cacnb4),ENSMUSG00000019787(Trdn),ENSMUSG00000020524(Gria1),ENSMUSG00000020866(Cacna1g),ENSMUSG00000020882(Cacnb1),ENSMUSG00000024112(Cacna1h),ENSMUSG00000025221(Kcnip2),ENSMUSG00000025892(Gria4),ENSMUSG00000026961(Lrrc26…
BP	GO:0019220	regulation of phosphate metabolic process	256	299	555	1797	9.7e-14	6.5499e-12	ENSMUSG00000000555(Itga5),ENSMUSG00000000708(Kat2b),ENSMUSG00000001517(Foxm1),ENSMUSG00000002603(Tgfb1),ENSMUSG00000002944(Cd36),ENSMUSG00000003032(Klf4),ENSMUSG00000004207(Psap),ENSMUSG00000004371(Il11),ENSMUSG00000004709(Cd244a),ENSMUSG00000004791(Pgf),ENSMUSG00000004951(Hspb1),ENSMUSG00000005161(Prdx2),ENSMUSG00000005268(Prlr),ENSMUSG00000005640(Insrr),ENSMUSG00000005672(Kit),ENSMUSG0000000645…	ENSMUSG00000000120(Ngfr),ENSMUSG00000000142(Axin2),ENSMUSG00000000184(Ccnd2),ENSMUSG00000000567(Sox9),ENSMUSG00000000869(Il4),ENSMUSG00000000881(Dlg3),ENSMUSG00000001249(Hpn),ENSMUSG00000001672(Marveld3),ENSMUSG00000002384(Bmp8b),ENSMUSG00000002985(Apoe),ENSMUSG00000003948(Mmd),ENSMUSG00000004085(Map3k20),ENSMUSG00000004558(Ndrg2),ENSMUSG00000005087(Cd44),ENSMUSG00000005320(Fgfr4),ENSMUSG00000005…
BP	GO:0010975	regulation of neuron projection development	87	128	215	579	1e-13	6.72469e-12	ENSMUSG00000000305(Cdh4),ENSMUSG00000000708(Kat2b),ENSMUSG00000001227(Sema6b),ENSMUSG00000001507(Itga3),ENSMUSG00000001627(Ifrd1),ENSMUSG00000003032(Klf4),ENSMUSG00000004885(Crabp2),ENSMUSG00000004951(Hspb1),ENSMUSG00000015619(Gata3),ENSMUSG00000019970(Sgk1),ENSMUSG00000020184(Mdm2),ENSMUSG00000020393(Kremen1),ENSMUSG00000020598(Nrcam),ENSMUSG00000020857(Nme2),ENSMUSG00000021068(Nin),ENSMUSG00000…	ENSMUSG00000000120(Ngfr),ENSMUSG00000000627(Sema4f),ENSMUSG00000000753(Serpinf1),ENSMUSG00000000861(Bcl11a),ENSMUSG00000002985(Apoe),ENSMUSG00000003934(Efnb3),ENSMUSG00000005958(Ephb3),ENSMUSG00000006476(Nsmf),ENSMUSG00000006586(Runx1t1),ENSMUSG00000006930(Hap1),ENSMUSG00000008999(Bmp7),ENSMUSG00000013236(Ptprs),ENSMUSG00000014602(Kif1a),ENSMUSG00000015222(Map2),ENSMUSG00000019178(Styxl1),ENSMUSG…
BP	GO:0022407	regulation of cell-cell adhesion	93	78	171	434	1.1e-13	7.30695e-12	ENSMUSG00000000706(Btn1a1),ENSMUSG00000000791(Il12rb1),ENSMUSG00000002603(Tgfb1),ENSMUSG00000003032(Klf4),ENSMUSG00000004709(Cd244a),ENSMUSG00000005161(Prdx2),ENSMUSG00000006574(Slc4a1),ENSMUSG00000007817(Zmiz1),ENSMUSG00000011256(Adam19),ENSMUSG00000013418(B4galnt2),ENSMUSG00000015619(Gata3),ENSMUSG00000015812(Gnrh1),ENSMUSG00000016498(Pdcd1lg2),ENSMUSG00000017446(C1qtnf1),ENSMUSG00000017697(Ada…	ENSMUSG00000000303(Cdh1),ENSMUSG00000000320(Alox12),ENSMUSG00000000732(Icosl),ENSMUSG00000000782(Tcf7),ENSMUSG00000000869(Il4),ENSMUSG00000003882(Il7r),ENSMUSG00000003934(Efnb3),ENSMUSG00000005087(Cd44),ENSMUSG00000005824(Tnfsf14),ENSMUSG00000005958(Ephb3),ENSMUSG00000006538(Ihh),ENSMUSG00000008999(Bmp7),ENSMUSG00000015396(Cd83),ENSMUSG00000016493(Cd46),ENSMUSG00000018924(Alox15),ENSMUSG000000199…
BP	GO:0003015	heart process	44	59	103	223	1.1e-13	7.30695e-12	ENSMUSG00000004113(Cacna1b),ENSMUSG00000017697(Ada),ENSMUSG00000018932(Map2k3),ENSMUSG00000019997(Ccn2),ENSMUSG00000020184(Mdm2),ENSMUSG00000021194(Chga),ENSMUSG00000021313(Ryr2),ENSMUSG00000021699(Pde4d),ENSMUSG00000024065(Ehd3),ENSMUSG00000024140(Epas1),ENSMUSG00000025880(Smad7),ENSMUSG00000026313(Hdac4),ENSMUSG00000026360(Rgs2),ENSMUSG00000026418(Tnni1),ENSMUSG00000027488(Snta1),ENSMUSG0000002…	ENSMUSG00000006576(Slc4a3),ENSMUSG00000007877(Tcap),ENSMUSG00000011751(Sptbn4),ENSMUSG00000015968(Cacna1d),ENSMUSG00000019787(Trdn),ENSMUSG00000019789(Hey2),ENSMUSG00000020123(Avpr1a),ENSMUSG00000020439(Smtn),ENSMUSG00000020866(Cacna1g),ENSMUSG00000021367(Edn1),ENSMUSG00000021779(Thrb),ENSMUSG00000022803(Popdc2),ENSMUSG00000022865(Cxadr),ENSMUSG00000024027(Glp1r),ENSMUSG00000024935(Slc1a1),ENSMUS…
BP	GO:0040017	positive regulation of locomotion	119	101	220	596	1.1e-13	7.30695e-12	ENSMUSG00000000555(Itga5),ENSMUSG00000001227(Sema6b),ENSMUSG00000001507(Itga3),ENSMUSG00000002233(Rhoc),ENSMUSG00000002603(Tgfb1),ENSMUSG00000003814(Calr),ENSMUSG00000004791(Pgf),ENSMUSG00000004951(Hspb1),ENSMUSG00000005413(Hmox1),ENSMUSG00000005672(Kit),ENSMUSG00000006304(Arpc2),ENSMUSG00000012705(Retn),ENSMUSG00000013076(Amotl1),ENSMUSG00000015533(Itga2),ENSMUSG00000015619(Gata3),ENSMUSG0000001…	ENSMUSG00000000320(Alox12),ENSMUSG00000000567(Sox9),ENSMUSG00000000627(Sema4f),ENSMUSG00000000869(Il4),ENSMUSG00000000957(Mmp14),ENSMUSG00000001435(Col18a1),ENSMUSG00000001741(Il16),ENSMUSG00000005533(Igf1r),ENSMUSG00000005824(Tnfsf14),ENSMUSG00000006476(Nsmf),ENSMUSG00000007805(Twist2),ENSMUSG00000008461(Fut1),ENSMUSG00000008601(Rab25),ENSMUSG00000008999(Bmp7),ENSMUSG00000009376(Met),ENSMUSG0000…
BP	GO:0051272	positive regulation of cellular component movement	115	101	216	583	1.2e-13	7.84368e-12	ENSMUSG00000000555(Itga5),ENSMUSG00000001227(Sema6b),ENSMUSG00000001507(Itga3),ENSMUSG00000002233(Rhoc),ENSMUSG00000002603(Tgfb1),ENSMUSG00000003814(Calr),ENSMUSG00000004791(Pgf),ENSMUSG00000004951(Hspb1),ENSMUSG00000005413(Hmox1),ENSMUSG00000005672(Kit),ENSMUSG00000006304(Arpc2),ENSMUSG00000012705(Retn),ENSMUSG00000013076(Amotl1),ENSMUSG00000015533(Itga2),ENSMUSG00000015619(Gata3),ENSMUSG0000001…	ENSMUSG00000000320(Alox12),ENSMUSG00000000567(Sox9),ENSMUSG00000000627(Sema4f),ENSMUSG00000000869(Il4),ENSMUSG00000000957(Mmp14),ENSMUSG00000001435(Col18a1),ENSMUSG00000005533(Igf1r),ENSMUSG00000005824(Tnfsf14),ENSMUSG00000006476(Nsmf),ENSMUSG00000007805(Twist2),ENSMUSG00000008461(Fut1),ENSMUSG00000008601(Rab25),ENSMUSG00000008999(Bmp7),ENSMUSG00000009376(Met),ENSMUSG00000015222(Map2),ENSMUSG0000…
BP	GO:0031589	cell-substrate adhesion	66	75	141	339	1.2e-13	7.84368e-12	ENSMUSG00000000555(Itga5),ENSMUSG00000001507(Itga3),ENSMUSG00000002250(Ppard),ENSMUSG00000002808(Epdr1),ENSMUSG00000002944(Cd36),ENSMUSG00000002980(Bcam),ENSMUSG00000003814(Calr),ENSMUSG00000006304(Arpc2),ENSMUSG00000015533(Itga2),ENSMUSG00000015647(Lama5),ENSMUSG00000019997(Ccn2),ENSMUSG00000020689(Itgb3),ENSMUSG00000020717(Pecam1),ENSMUSG00000021365(Nedd9),ENSMUSG00000021806(Nid2),ENSMUSG000000…	ENSMUSG00000000157(Itgb2l),ENSMUSG00000000402(Egfl6),ENSMUSG00000000957(Mmp14),ENSMUSG00000005958(Ephb3),ENSMUSG00000008461(Fut1),ENSMUSG00000017344(Vtn),ENSMUSG00000018012(Rac3),ENSMUSG00000018924(Alox15),ENSMUSG00000020019(Ntn4),ENSMUSG00000020758(Itgb4),ENSMUSG00000021750(Fam107a),ENSMUSG00000022026(Olfm4),ENSMUSG00000022425(Enpp2),ENSMUSG00000022505(Emp2),ENSMUSG00000022548(Apod),ENSMUSG00000…
BP	GO:0010562	positive regulation of phosphorus metabolic process	172	211	383	1167	1.2e-13	7.84368e-12	ENSMUSG00000000555(Itga5),ENSMUSG00000002603(Tgfb1),ENSMUSG00000002944(Cd36),ENSMUSG00000004207(Psap),ENSMUSG00000004371(Il11),ENSMUSG00000004709(Cd244a),ENSMUSG00000004791(Pgf),ENSMUSG00000005161(Prdx2),ENSMUSG00000005268(Prlr),ENSMUSG00000005640(Insrr),ENSMUSG00000005672(Kit),ENSMUSG00000006457(Actn3),ENSMUSG00000007659(Bcl2l1),ENSMUSG00000013483(Card14),ENSMUSG00000015312(Gadd45b),ENSMUSG00000…	ENSMUSG00000000120(Ngfr),ENSMUSG00000000142(Axin2),ENSMUSG00000000184(Ccnd2),ENSMUSG00000000567(Sox9),ENSMUSG00000000869(Il4),ENSMUSG00000000881(Dlg3),ENSMUSG00000002384(Bmp8b),ENSMUSG00000002985(Apoe),ENSMUSG00000003948(Mmd),ENSMUSG00000004085(Map3k20),ENSMUSG00000005087(Cd44),ENSMUSG00000005320(Fgfr4),ENSMUSG00000005958(Ephb3),ENSMUSG00000006476(Nsmf),ENSMUSG00000008999(Bmp7),ENSMUSG00000011171…
BP	GO:0045937	positive regulation of phosphate metabolic process	172	211	383	1167	1.2e-13	7.84368e-12	ENSMUSG00000000555(Itga5),ENSMUSG00000002603(Tgfb1),ENSMUSG00000002944(Cd36),ENSMUSG00000004207(Psap),ENSMUSG00000004371(Il11),ENSMUSG00000004709(Cd244a),ENSMUSG00000004791(Pgf),ENSMUSG00000005161(Prdx2),ENSMUSG00000005268(Prlr),ENSMUSG00000005640(Insrr),ENSMUSG00000005672(Kit),ENSMUSG00000006457(Actn3),ENSMUSG00000007659(Bcl2l1),ENSMUSG00000013483(Card14),ENSMUSG00000015312(Gadd45b),ENSMUSG00000…	ENSMUSG00000000120(Ngfr),ENSMUSG00000000142(Axin2),ENSMUSG00000000184(Ccnd2),ENSMUSG00000000567(Sox9),ENSMUSG00000000869(Il4),ENSMUSG00000000881(Dlg3),ENSMUSG00000002384(Bmp8b),ENSMUSG00000002985(Apoe),ENSMUSG00000003948(Mmd),ENSMUSG00000004085(Map3k20),ENSMUSG00000005087(Cd44),ENSMUSG00000005320(Fgfr4),ENSMUSG00000005958(Ephb3),ENSMUSG00000006476(Nsmf),ENSMUSG00000008999(Bmp7),ENSMUSG00000011171…
BP	GO:0007507	heart development	102	116	218	590	1.3e-13	8.42988e-12	ENSMUSG00000000708(Kat2b),ENSMUSG00000001098(Kctd10),ENSMUSG00000001507(Itga3),ENSMUSG00000002250(Ppard),ENSMUSG00000002603(Tgfb1),ENSMUSG00000003814(Calr),ENSMUSG00000003865(Gys1),ENSMUSG00000005148(Klf5),ENSMUSG00000006221(Hspb7),ENSMUSG00000007817(Zmiz1),ENSMUSG00000011256(Adam19),ENSMUSG00000013629(Cad),ENSMUSG00000015619(Gata3),ENSMUSG00000017491(Rarb),ENSMUSG00000018593(Sparc),ENSMUSG000000…	ENSMUSG00000000142(Axin2),ENSMUSG00000000567(Sox9),ENSMUSG00000001870(Ltbp1),ENSMUSG00000005836(Gata6),ENSMUSG00000006538(Ihh),ENSMUSG00000007877(Tcap),ENSMUSG00000008136(Fhl2),ENSMUSG00000008999(Bmp7),ENSMUSG00000010797(Wnt2),ENSMUSG00000015957(Wnt11),ENSMUSG00000017817(Jph2),ENSMUSG00000018581(Dnah11),ENSMUSG00000018830(Myh11),ENSMUSG00000019789(Hey2),ENSMUSG00000020052(Ascl1),ENSMUSG0000002038…
BP	GO:0055080	cation homeostasis	116	148	264	747	1.3e-13	8.42988e-12	ENSMUSG00000000216(Scnn1g),ENSMUSG00000000805(Car4),ENSMUSG00000000817(Fasl),ENSMUSG00000002015(Bcap31),ENSMUSG00000002603(Tgfb1),ENSMUSG00000002944(Cd36),ENSMUSG00000003657(Calb2),ENSMUSG00000004113(Cacna1b),ENSMUSG00000005220(Corin),ENSMUSG00000005413(Hmox1),ENSMUSG00000006567(Atp7b),ENSMUSG00000006574(Slc4a1),ENSMUSG00000012819(Cdh23),ENSMUSG00000014077(Chp1),ENSMUSG00000017446(C1qtnf1),ENSMUS…	ENSMUSG00000002985(Apoe),ENSMUSG00000003352(Cacnb3),ENSMUSG00000004035(Gstm7),ENSMUSG00000006576(Slc4a3),ENSMUSG00000006930(Hap1),ENSMUSG00000007107(Atp1a4),ENSMUSG00000007122(Casq1),ENSMUSG00000011008(Mcoln2),ENSMUSG00000015968(Cacna1d),ENSMUSG00000017412(Cacnb4),ENSMUSG00000017817(Jph2),ENSMUSG00000018340(Anxa6),ENSMUSG00000019787(Trdn),ENSMUSG00000020123(Avpr1a),ENSMUSG00000020524(Gria1),ENSMU…
BP	GO:0070848	response to growth factor	126	116	242	672	1.4e-13	9.04245e-12	ENSMUSG00000000817(Fasl),ENSMUSG00000001507(Itga3),ENSMUSG00000002603(Tgfb1),ENSMUSG00000003032(Klf4),ENSMUSG00000003665(Has1),ENSMUSG00000004791(Pgf),ENSMUSG00000004951(Hspb1),ENSMUSG00000006205(Htra1),ENSMUSG00000006304(Arpc2),ENSMUSG00000006800(Sulf2),ENSMUSG00000006958(Chrd),ENSMUSG00000007817(Zmiz1),ENSMUSG00000013629(Cad),ENSMUSG00000015619(Gata3),ENSMUSG00000016918(Sulf1),ENSMUSG0000001859…	ENSMUSG00000000120(Ngfr),ENSMUSG00000000567(Sox9),ENSMUSG00000001494(Sost),ENSMUSG00000001870(Ltbp1),ENSMUSG00000002384(Bmp8b),ENSMUSG00000004231(Pax2),ENSMUSG00000005087(Cd44),ENSMUSG00000005320(Fgfr4),ENSMUSG00000005836(Gata6),ENSMUSG00000006930(Hap1),ENSMUSG00000008999(Bmp7),ENSMUSG00000010797(Wnt2),ENSMUSG00000018238(Gdf9),ENSMUSG00000019831(Wasf1),ENSMUSG00000019929(Dcn),ENSMUSG00000020052(A…
BP	GO:0001503	ossification	76	74	150	368	1.5e-13	9.61235e-12	ENSMUSG00000002603(Tgfb1),ENSMUSG00000004473(Clec11a),ENSMUSG00000006457(Actn3),ENSMUSG00000006958(Chrd),ENSMUSG00000018593(Sparc),ENSMUSG00000019359(Gdpd2),ENSMUSG00000019997(Ccn2),ENSMUSG00000020077(Srgn),ENSMUSG00000020325(Fstl3),ENSMUSG00000020393(Kremen1),ENSMUSG00000020427(Igfbp3),ENSMUSG00000020846(Rflnb),ENSMUSG00000021318(Gli3),ENSMUSG00000022868(Ahsg),ENSMUSG00000022996(Wnt10b),ENSMUSG0…	ENSMUSG00000000142(Axin2),ENSMUSG00000000567(Sox9),ENSMUSG00000000957(Mmp14),ENSMUSG00000001494(Sost),ENSMUSG00000001802(Lrp3),ENSMUSG00000002384(Bmp8b),ENSMUSG00000006538(Ihh),ENSMUSG00000007279(Scube2),ENSMUSG00000007805(Twist2),ENSMUSG00000008136(Fhl2),ENSMUSG00000008999(Bmp7),ENSMUSG00000014704(Hoxa2),ENSMUSG00000015957(Wnt11),ENSMUSG00000018924(Alox15),ENSMUSG00000021379(Id4),ENSMUSG00000021…
BP	GO:0010720	positive regulation of cell development	93	139	232	638	1.5e-13	9.61235e-12	ENSMUSG00000000305(Cdh4),ENSMUSG00000000708(Kat2b),ENSMUSG00000001507(Itga3),ENSMUSG00000002603(Tgfb1),ENSMUSG00000003814(Calr),ENSMUSG00000004031(Brinp2),ENSMUSG00000004885(Crabp2),ENSMUSG00000004951(Hspb1),ENSMUSG00000005672(Kit),ENSMUSG00000006304(Arpc2),ENSMUSG00000006457(Actn3),ENSMUSG00000017491(Rarb),ENSMUSG00000019970(Sgk1),ENSMUSG00000020689(Itgb3),ENSMUSG00000020857(Nme2),ENSMUSG0000002…	ENSMUSG00000000120(Ngfr),ENSMUSG00000000753(Serpinf1),ENSMUSG00000000861(Bcl11a),ENSMUSG00000002985(Apoe),ENSMUSG00000003282(Plag1),ENSMUSG00000003948(Mmd),ENSMUSG00000006476(Nsmf),ENSMUSG00000006930(Hap1),ENSMUSG00000007989(Fzd3),ENSMUSG00000008999(Bmp7),ENSMUSG00000010086(Rnf112),ENSMUSG00000010797(Wnt2),ENSMUSG00000013089(Etv5),ENSMUSG00000018012(Rac3),ENSMUSG00000019178(Styxl1),ENSMUSG0000001…
BP	GO:0050790	regulation of catalytic activity	339	329	668	2228	1.6e-13	1.02131e-11	ENSMUSG00000000001(Gnai3),ENSMUSG00000000594(Gm2a),ENSMUSG00000000708(Kat2b),ENSMUSG00000000817(Fasl),ENSMUSG00000000983(Wfdc18),ENSMUSG00000001131(Timp1),ENSMUSG00000001588(Acap1),ENSMUSG00000001995(Sipa1l2),ENSMUSG00000002015(Bcap31),ENSMUSG00000002233(Rhoc),ENSMUSG00000002250(Ppard),ENSMUSG00000002603(Tgfb1),ENSMUSG00000003032(Klf4),ENSMUSG00000004207(Psap),ENSMUSG00000004460(Dnajb11),ENSMUSG0…	ENSMUSG00000000120(Ngfr),ENSMUSG00000000126(Wnt9a),ENSMUSG00000000142(Axin2),ENSMUSG00000000184(Ccnd2),ENSMUSG00000000320(Alox12),ENSMUSG00000000730(Dnmt3l),ENSMUSG00000000753(Serpinf1),ENSMUSG00000000869(Il4),ENSMUSG00000000881(Dlg3),ENSMUSG00000001249(Hpn),ENSMUSG00000002289(Angptl4),ENSMUSG00000002459(Rgs20),ENSMUSG00000002985(Apoe),ENSMUSG00000003452(Bicd1),ENSMUSG00000003948(Mmd),ENSMUSG0000…
BP	GO:0002062	chondrocyte differentiation	27	38	65	118	1.7e-13	1.06845e-11	ENSMUSG00000002565(Scin),ENSMUSG00000002603(Tgfb1),ENSMUSG00000006800(Sulf2),ENSMUSG00000016918(Sulf1),ENSMUSG00000017491(Rarb),ENSMUSG00000019997(Ccn2),ENSMUSG00000020583(Matn3),ENSMUSG00000020846(Rflnb),ENSMUSG00000020953(Coch),ENSMUSG00000021318(Gli3),ENSMUSG00000022094(Slc39a14),ENSMUSG00000022371(Col14a1),ENSMUSG00000022996(Wnt10b),ENSMUSG00000024247(Pkdcc),ENSMUSG00000025880(Smad7),ENSMUSG0…	ENSMUSG00000000126(Wnt9a),ENSMUSG00000000142(Axin2),ENSMUSG00000000567(Sox9),ENSMUSG00000001119(Col6a1),ENSMUSG00000006538(Ihh),ENSMUSG00000007279(Scube2),ENSMUSG00000008575(Nfib),ENSMUSG00000018340(Anxa6),ENSMUSG00000020241(Col6a2),ENSMUSG00000021469(Msx2),ENSMUSG00000021779(Thrb),ENSMUSG00000021835(Bmp4),ENSMUSG00000022330(Osr2),ENSMUSG00000024076(Vit),ENSMUSG00000025082(Vwa2),ENSMUSG0000002565…
BP	GO:0007169	transmembrane receptor protein tyrosine kinase signaling pathway	111	100	211	568	1.7e-13	1.06845e-11	ENSMUSG00000000817(Fasl),ENSMUSG00000002603(Tgfb1),ENSMUSG00000004508(Gab2),ENSMUSG00000004791(Pgf),ENSMUSG00000004951(Hspb1),ENSMUSG00000005057(Sh2b2),ENSMUSG00000005268(Prlr),ENSMUSG00000005640(Insrr),ENSMUSG00000005672(Kit),ENSMUSG00000006800(Sulf2),ENSMUSG00000015619(Gata3),ENSMUSG00000016918(Sulf1),ENSMUSG00000019997(Ccn2),ENSMUSG00000020097(Sgpl1),ENSMUSG00000020170(Frs2),ENSMUSG00000020176…	ENSMUSG00000000120(Ngfr),ENSMUSG00000000567(Sox9),ENSMUSG00000001583(Tnk1),ENSMUSG00000003934(Efnb3),ENSMUSG00000005320(Fgfr4),ENSMUSG00000005533(Igf1r),ENSMUSG00000005958(Ephb3),ENSMUSG00000006930(Hap1),ENSMUSG00000009376(Met),ENSMUSG00000014453(Blk),ENSMUSG00000015950(Ncf1),ENSMUSG00000019831(Wasf1),ENSMUSG00000019893(Ros1),ENSMUSG00000019929(Dcn),ENSMUSG00000020919(Stat5b),ENSMUSG00000021448(S…
BP	GO:0050808	synapse organization	43	114	157	391	1.7e-13	1.06845e-11	ENSMUSG00000000560(Gabra2),ENSMUSG00000018593(Sparc),ENSMUSG00000021782(Dlg5),ENSMUSG00000024868(Dkk1),ENSMUSG00000025020(Slit1),ENSMUSG00000025889(Snca),ENSMUSG00000026259(Ngef),ENSMUSG00000026442(Nfasc),ENSMUSG00000027253(Lrp4),ENSMUSG00000027488(Snta1),ENSMUSG00000028072(Ntrk1),ENSMUSG00000028273(Pdlim5),ENSMUSG00000029838(Ptn),ENSMUSG00000030000(Add2),ENSMUSG00000030098(Grip2),ENSMUSG00000030…	ENSMUSG00000000303(Cdh1),ENSMUSG00000000416(Cttnbp2),ENSMUSG00000000881(Dlg3),ENSMUSG00000002104(Rapsn),ENSMUSG00000002985(Apoe),ENSMUSG00000003279(Dlgap1),ENSMUSG00000003352(Cacnb3),ENSMUSG00000005958(Ephb3),ENSMUSG00000007653(Gabrb2),ENSMUSG00000013089(Etv5),ENSMUSG00000013236(Ptprs),ENSMUSG00000017412(Cacnb4),ENSMUSG00000019831(Wasf1),ENSMUSG00000020882(Cacnb1),ENSMUSG00000020902(Ntn1),ENSMUSG…
CC	GO:0045211	postsynaptic membrane	33	99	132	311	1.7e-13	1.06845e-11	ENSMUSG00000000560(Gabra2),ENSMUSG00000001260(Gabrg1),ENSMUSG00000004951(Hspb1),ENSMUSG00000019558(Slc6a8),ENSMUSG00000020368(Canx),ENSMUSG00000020598(Nrcam),ENSMUSG00000020689(Itgb3),ENSMUSG00000022494(Shisa9),ENSMUSG00000022602(Arc),ENSMUSG00000024873(Cnih2),ENSMUSG00000025161(Slc16a3),ENSMUSG00000025496(Drd4),ENSMUSG00000027488(Snta1),ENSMUSG00000030096(Slc6a6),ENSMUSG00000030098(Grip2),ENSMUS…	ENSMUSG00000000627(Sema4f),ENSMUSG00000001985(Grik3),ENSMUSG00000002104(Rapsn),ENSMUSG00000003279(Dlgap1),ENSMUSG00000003378(Grik5),ENSMUSG00000003872(Lin7b),ENSMUSG00000003934(Efnb3),ENSMUSG00000007653(Gabrb2),ENSMUSG00000013236(Ptprs),ENSMUSG00000015476(Prrt1),ENSMUSG00000017978(Cadps2),ENSMUSG00000019906(Lin7a),ENSMUSG00000020102(Slc16a7),ENSMUSG00000020159(Gabrp),ENSMUSG00000020388(Pdlim4),EN…
CC	GO:0030424	axon	96	126	222	603	1.8e-13	1.12697e-11	ENSMUSG00000000560(Gabra2),ENSMUSG00000002603(Tgfb1),ENSMUSG00000003657(Calb2),ENSMUSG00000004849(Ap1s1),ENSMUSG00000004951(Hspb1),ENSMUSG00000005640(Insrr),ENSMUSG00000009418(Nav1),ENSMUSG00000013415(Igf2bp1),ENSMUSG00000013629(Cad),ENSMUSG00000015533(Itga2),ENSMUSG00000020182(Ddc),ENSMUSG00000020315(Sptbn1),ENSMUSG00000020368(Canx),ENSMUSG00000020598(Nrcam),ENSMUSG00000021068(Nin),ENSMUSG000000…	ENSMUSG00000000753(Serpinf1),ENSMUSG00000000889(Dbh),ENSMUSG00000001985(Grik3),ENSMUSG00000003378(Grik5),ENSMUSG00000005089(Slc1a2),ENSMUSG00000006930(Hap1),ENSMUSG00000007989(Fzd3),ENSMUSG00000008575(Nfib),ENSMUSG00000011751(Sptbn4),ENSMUSG00000013236(Ptprs),ENSMUSG00000014602(Kif1a),ENSMUSG00000015222(Map2),ENSMUSG00000017167(Cntnap1),ENSMUSG00000017390(Aldoc),ENSMUSG00000019996(Map7),ENSMUSG00…
BP	GO:0055082	cellular chemical homeostasis	129	165	294	854	2.1e-13	1.30977e-11	ENSMUSG00000000628(Hk2),ENSMUSG00000000817(Fasl),ENSMUSG00000002015(Bcap31),ENSMUSG00000002603(Tgfb1),ENSMUSG00000002944(Cd36),ENSMUSG00000003657(Calb2),ENSMUSG00000004113(Cacna1b),ENSMUSG00000005413(Hmox1),ENSMUSG00000006567(Atp7b),ENSMUSG00000006574(Slc4a1),ENSMUSG00000012819(Cdh23),ENSMUSG00000014077(Chp1),ENSMUSG00000017446(C1qtnf1),ENSMUSG00000017716(Birc5),ENSMUSG00000018585(Atox1),ENSMUSG0…	ENSMUSG00000000120(Ngfr),ENSMUSG00000000753(Serpinf1),ENSMUSG00000001270(Ckb),ENSMUSG00000002985(Apoe),ENSMUSG00000003352(Cacnb3),ENSMUSG00000003378(Grik5),ENSMUSG00000004035(Gstm7),ENSMUSG00000004347(Pde1c),ENSMUSG00000006576(Slc4a3),ENSMUSG00000006930(Hap1),ENSMUSG00000007107(Atp1a4),ENSMUSG00000007122(Casq1),ENSMUSG00000011008(Mcoln2),ENSMUSG00000015968(Cacna1d),ENSMUSG00000017412(Cacnb4),ENSM…
MF	GO:0046872	metal ion binding	493	626	1119	3961	2.4e-13	1.49119e-11	ENSMUSG00000000001(Gnai3),ENSMUSG00000000088(Cox5a),ENSMUSG00000000305(Cdh4),ENSMUSG00000000420(Galnt1),ENSMUSG00000000555(Itga5),ENSMUSG00000000805(Car4),ENSMUSG00000001020(S100a4),ENSMUSG00000001021(S100a3),ENSMUSG00000001023(S100a5),ENSMUSG00000001025(S100a6),ENSMUSG00000001131(Timp1),ENSMUSG00000001467(Cyp51),ENSMUSG00000001588(Acap1),ENSMUSG00000001773(Folh1),ENSMUSG00000001864(Aif1l),ENSMUS…	ENSMUSG00000000253(Gmpr),ENSMUSG00000000303(Cdh1),ENSMUSG00000000320(Alox12),ENSMUSG00000000402(Egfl6),ENSMUSG00000000730(Dnmt3l),ENSMUSG00000000731(Aire),ENSMUSG00000000861(Bcl11a),ENSMUSG00000000889(Dbh),ENSMUSG00000000901(Mmp11),ENSMUSG00000000957(Mmp14),ENSMUSG00000001435(Col18a1),ENSMUSG00000001508(Sgca),ENSMUSG00000001604(Tcea3),ENSMUSG00000001865(Cpa3),ENSMUSG00000001870(Ltbp1),ENSMUSG0000…
BP	GO:0008016	regulation of heart contraction	37	50	87	179	2.5e-13	1.54744e-11	ENSMUSG00000004113(Cacna1b),ENSMUSG00000017697(Ada),ENSMUSG00000019997(Ccn2),ENSMUSG00000020184(Mdm2),ENSMUSG00000021194(Chga),ENSMUSG00000021313(Ryr2),ENSMUSG00000021699(Pde4d),ENSMUSG00000024065(Ehd3),ENSMUSG00000024140(Epas1),ENSMUSG00000025880(Smad7),ENSMUSG00000026313(Hdac4),ENSMUSG00000026360(Rgs2),ENSMUSG00000027488(Snta1),ENSMUSG00000028420(Tmem38b),ENSMUSG00000028635(Edn2),ENSMUSG0000002…	ENSMUSG00000006576(Slc4a3),ENSMUSG00000011751(Sptbn4),ENSMUSG00000015968(Cacna1d),ENSMUSG00000019789(Hey2),ENSMUSG00000020123(Avpr1a),ENSMUSG00000020439(Smtn),ENSMUSG00000020866(Cacna1g),ENSMUSG00000021367(Edn1),ENSMUSG00000021779(Thrb),ENSMUSG00000022803(Popdc2),ENSMUSG00000022865(Cxadr),ENSMUSG00000024027(Glp1r),ENSMUSG00000024935(Slc1a1),ENSMUSG00000026414(Tnnt2),ENSMUSG00000026463(Atp2b4),ENS…
BP	GO:0002376	immune system process	349	349	698	2347	2.6e-13	1.59724e-11	ENSMUSG00000000706(Btn1a1),ENSMUSG00000000791(Il12rb1),ENSMUSG00000000817(Fasl),ENSMUSG00000002565(Scin),ENSMUSG00000002603(Tgfb1),ENSMUSG00000002944(Cd36),ENSMUSG00000002957(Ap2a2),ENSMUSG00000003032(Klf4),ENSMUSG00000003500(Impdh1),ENSMUSG00000003814(Calr),ENSMUSG00000004207(Psap),ENSMUSG00000004508(Gab2),ENSMUSG00000004709(Cd244a),ENSMUSG00000004791(Pgf),ENSMUSG00000005057(Sh2b2),ENSMUSG000000…	ENSMUSG00000000567(Sox9),ENSMUSG00000000690(Hoxb6),ENSMUSG00000000731(Aire),ENSMUSG00000000732(Icosl),ENSMUSG00000000782(Tcf7),ENSMUSG00000000861(Bcl11a),ENSMUSG00000000869(Il4),ENSMUSG00000000889(Dbh),ENSMUSG00000000903(Vpreb3),ENSMUSG00000000957(Mmp14),ENSMUSG00000001741(Il16),ENSMUSG00000002985(Apoe),ENSMUSG00000003352(Cacnb3),ENSMUSG00000003379(Cd79a),ENSMUSG00000003411(Rab3b),ENSMUSG00000003…
BP	GO:0006915	apoptotic process	300	275	575	1881	2.6e-13	1.59724e-11	ENSMUSG00000000001(Gnai3),ENSMUSG00000000555(Itga5),ENSMUSG00000000628(Hk2),ENSMUSG00000000817(Fasl),ENSMUSG00000001131(Timp1),ENSMUSG00000001642(Akr1b3),ENSMUSG00000001773(Folh1),ENSMUSG00000002015(Bcap31),ENSMUSG00000002250(Ppard),ENSMUSG00000002565(Scin),ENSMUSG00000002603(Tgfb1),ENSMUSG00000003032(Klf4),ENSMUSG00000003541(Ier3),ENSMUSG00000004328(Hif3a),ENSMUSG00000004535(Tax1bp1),ENSMUSG0000…	ENSMUSG00000000120(Ngfr),ENSMUSG00000000126(Wnt9a),ENSMUSG00000000184(Ccnd2),ENSMUSG00000000308(Ckmt1),ENSMUSG00000000320(Alox12),ENSMUSG00000000392(Fap),ENSMUSG00000000567(Sox9),ENSMUSG00000000782(Tcf7),ENSMUSG00000000869(Il4),ENSMUSG00000000889(Dbh),ENSMUSG00000001249(Hpn),ENSMUSG00000001435(Col18a1),ENSMUSG00000002104(Rapsn),ENSMUSG00000002289(Angptl4),ENSMUSG00000002985(Apoe),ENSMUSG000000033…
BP	GO:0003018	vascular process in circulatory system	48	42	90	188	2.9e-13	1.77487e-11	ENSMUSG00000000708(Kat2b),ENSMUSG00000002250(Ppard),ENSMUSG00000002603(Tgfb1),ENSMUSG00000018500(Adora2b),ENSMUSG00000021194(Chga),ENSMUSG00000021670(Hmgcr),ENSMUSG00000022122(Ednrb),ENSMUSG00000022875(Kng1),ENSMUSG00000024942(Capn1),ENSMUSG00000025026(Add3),ENSMUSG00000025701(Alox5),ENSMUSG00000026228(Htr2b),ENSMUSG00000026360(Rgs2),ENSMUSG00000027488(Snta1),ENSMUSG00000028001(Fga),ENSMUSG000000…	ENSMUSG00000000320(Alox12),ENSMUSG00000000889(Dbh),ENSMUSG00000002985(Apoe),ENSMUSG00000005611(Mrvi1),ENSMUSG00000020123(Avpr1a),ENSMUSG00000020155(Kcnmb1),ENSMUSG00000020787(P2rx1),ENSMUSG00000020838(Slc6a4),ENSMUSG00000020866(Cacna1g),ENSMUSG00000021070(Bdkrb2),ENSMUSG00000021367(Edn1),ENSMUSG00000021678(F2rl1),ENSMUSG00000022994(Adcy6),ENSMUSG00000024039(Cbs),ENSMUSG00000024256(Adcyap1),ENSMUS…
BP	GO:0065007	biological regulation	1463	1776	3239	12814	3e-13	1.82922e-11	ENSMUSG00000000001(Gnai3),ENSMUSG00000000028(Cdc45),ENSMUSG00000000216(Scnn1g),ENSMUSG00000000305(Cdh4),ENSMUSG00000000555(Itga5),ENSMUSG00000000560(Gabra2),ENSMUSG00000000594(Gm2a),ENSMUSG00000000628(Hk2),ENSMUSG00000000706(Btn1a1),ENSMUSG00000000708(Kat2b),ENSMUSG00000000791(Il12rb1),ENSMUSG00000000792(Slc5a5),ENSMUSG00000000805(Car4),ENSMUSG00000000817(Fasl),ENSMUSG00000000983(Wfdc18),ENSMUSG0…	ENSMUSG00000000085(Scmh1),ENSMUSG00000000120(Ngfr),ENSMUSG00000000126(Wnt9a),ENSMUSG00000000142(Axin2),ENSMUSG00000000157(Itgb2l),ENSMUSG00000000184(Ccnd2),ENSMUSG00000000303(Cdh1),ENSMUSG00000000308(Ckmt1),ENSMUSG00000000320(Alox12),ENSMUSG00000000385(Tmprss2),ENSMUSG00000000392(Fap),ENSMUSG00000000402(Egfl6),ENSMUSG00000000416(Cttnbp2),ENSMUSG00000000562(Adora3),ENSMUSG00000000567(Sox9),ENSMUSG…
BP	GO:0055065	metal ion homeostasis	106	137	243	680	3.3e-13	2.00466e-11	ENSMUSG00000000216(Scnn1g),ENSMUSG00000000817(Fasl),ENSMUSG00000002015(Bcap31),ENSMUSG00000002603(Tgfb1),ENSMUSG00000002944(Cd36),ENSMUSG00000003657(Calb2),ENSMUSG00000004113(Cacna1b),ENSMUSG00000005220(Corin),ENSMUSG00000005413(Hmox1),ENSMUSG00000006567(Atp7b),ENSMUSG00000012819(Cdh23),ENSMUSG00000017446(C1qtnf1),ENSMUSG00000018585(Atox1),ENSMUSG00000019970(Sgk1),ENSMUSG00000020689(Itgb3),ENSMUS…	ENSMUSG00000002985(Apoe),ENSMUSG00000003352(Cacnb3),ENSMUSG00000004035(Gstm7),ENSMUSG00000006930(Hap1),ENSMUSG00000007107(Atp1a4),ENSMUSG00000007122(Casq1),ENSMUSG00000011008(Mcoln2),ENSMUSG00000015968(Cacna1d),ENSMUSG00000017412(Cacnb4),ENSMUSG00000017817(Jph2),ENSMUSG00000018340(Anxa6),ENSMUSG00000019787(Trdn),ENSMUSG00000020123(Avpr1a),ENSMUSG00000020524(Gria1),ENSMUSG00000020787(P2rx1),ENSMUS…
BP	GO:0035296	regulation of tube diameter	40	38	78	155	4.2e-13	2.52324e-11	ENSMUSG00000000708(Kat2b),ENSMUSG00000002250(Ppard),ENSMUSG00000018500(Adora2b),ENSMUSG00000021194(Chga),ENSMUSG00000021670(Hmgcr),ENSMUSG00000022122(Ednrb),ENSMUSG00000022875(Kng1),ENSMUSG00000025026(Add3),ENSMUSG00000025701(Alox5),ENSMUSG00000026228(Htr2b),ENSMUSG00000026360(Rgs2),ENSMUSG00000027488(Snta1),ENSMUSG00000028001(Fga),ENSMUSG00000028635(Edn2),ENSMUSG00000028978(Nos3),ENSMUSG00000029…	ENSMUSG00000000320(Alox12),ENSMUSG00000000889(Dbh),ENSMUSG00000002985(Apoe),ENSMUSG00000005611(Mrvi1),ENSMUSG00000020123(Avpr1a),ENSMUSG00000020155(Kcnmb1),ENSMUSG00000020787(P2rx1),ENSMUSG00000020838(Slc6a4),ENSMUSG00000020866(Cacna1g),ENSMUSG00000021070(Bdkrb2),ENSMUSG00000021367(Edn1),ENSMUSG00000021678(F2rl1),ENSMUSG00000022994(Adcy6),ENSMUSG00000024039(Cbs),ENSMUSG00000024256(Adcyap1),ENSMUS…
BP	GO:0050880	regulation of blood vessel size	40	38	78	155	4.2e-13	2.52324e-11	ENSMUSG00000000708(Kat2b),ENSMUSG00000002250(Ppard),ENSMUSG00000018500(Adora2b),ENSMUSG00000021194(Chga),ENSMUSG00000021670(Hmgcr),ENSMUSG00000022122(Ednrb),ENSMUSG00000022875(Kng1),ENSMUSG00000025026(Add3),ENSMUSG00000025701(Alox5),ENSMUSG00000026228(Htr2b),ENSMUSG00000026360(Rgs2),ENSMUSG00000027488(Snta1),ENSMUSG00000028001(Fga),ENSMUSG00000028635(Edn2),ENSMUSG00000028978(Nos3),ENSMUSG00000029…	ENSMUSG00000000320(Alox12),ENSMUSG00000000889(Dbh),ENSMUSG00000002985(Apoe),ENSMUSG00000005611(Mrvi1),ENSMUSG00000020123(Avpr1a),ENSMUSG00000020155(Kcnmb1),ENSMUSG00000020787(P2rx1),ENSMUSG00000020838(Slc6a4),ENSMUSG00000020866(Cacna1g),ENSMUSG00000021070(Bdkrb2),ENSMUSG00000021367(Edn1),ENSMUSG00000021678(F2rl1),ENSMUSG00000022994(Adcy6),ENSMUSG00000024039(Cbs),ENSMUSG00000024256(Adcyap1),ENSMUS…
BP	GO:0097746	regulation of blood vessel diameter	40	38	78	155	4.2e-13	2.52324e-11	ENSMUSG00000000708(Kat2b),ENSMUSG00000002250(Ppard),ENSMUSG00000018500(Adora2b),ENSMUSG00000021194(Chga),ENSMUSG00000021670(Hmgcr),ENSMUSG00000022122(Ednrb),ENSMUSG00000022875(Kng1),ENSMUSG00000025026(Add3),ENSMUSG00000025701(Alox5),ENSMUSG00000026228(Htr2b),ENSMUSG00000026360(Rgs2),ENSMUSG00000027488(Snta1),ENSMUSG00000028001(Fga),ENSMUSG00000028635(Edn2),ENSMUSG00000028978(Nos3),ENSMUSG00000029…	ENSMUSG00000000320(Alox12),ENSMUSG00000000889(Dbh),ENSMUSG00000002985(Apoe),ENSMUSG00000005611(Mrvi1),ENSMUSG00000020123(Avpr1a),ENSMUSG00000020155(Kcnmb1),ENSMUSG00000020787(P2rx1),ENSMUSG00000020838(Slc6a4),ENSMUSG00000020866(Cacna1g),ENSMUSG00000021070(Bdkrb2),ENSMUSG00000021367(Edn1),ENSMUSG00000021678(F2rl1),ENSMUSG00000022994(Adcy6),ENSMUSG00000024039(Cbs),ENSMUSG00000024256(Adcyap1),ENSMUS…
BP	GO:0050878	regulation of body fluid levels	96	47	143	350	4.3e-13	2.57386e-11	ENSMUSG00000000216(Scnn1g),ENSMUSG00000000628(Hk2),ENSMUSG00000001642(Akr1b3),ENSMUSG00000002944(Cd36),ENSMUSG00000005161(Prdx2),ENSMUSG00000005268(Prlr),ENSMUSG00000005891(Prl4a1),ENSMUSG00000006488(Prl7a1),ENSMUSG00000006490(Prl8a9),ENSMUSG00000006567(Atp7b),ENSMUSG00000006574(Slc4a1),ENSMUSG00000006589(Aprt),ENSMUSG00000013629(Cad),ENSMUSG00000017064(Prl5a1),ENSMUSG00000017446(C1qtnf1),ENSMUSG…	ENSMUSG00000000320(Alox12),ENSMUSG00000001247(Lsr),ENSMUSG00000001420(Tmem79),ENSMUSG00000002985(Apoe),ENSMUSG00000009376(Met),ENSMUSG00000015085(Entpd2),ENSMUSG00000020647(Ncoa1),ENSMUSG00000020787(P2rx1),ENSMUSG00000020919(Stat5b),ENSMUSG00000021367(Edn1),ENSMUSG00000021678(F2rl1),ENSMUSG00000022149(C9),ENSMUSG00000022297(Fzd6),ENSMUSG00000022505(Emp2),ENSMUSG00000022510(Trp63),ENSMUSG000000244…
BP	GO:2000147	positive regulation of cell motility	114	95	209	566	4.4e-13	2.61456e-11	ENSMUSG00000000555(Itga5),ENSMUSG00000001227(Sema6b),ENSMUSG00000001507(Itga3),ENSMUSG00000002233(Rhoc),ENSMUSG00000002603(Tgfb1),ENSMUSG00000003814(Calr),ENSMUSG00000004791(Pgf),ENSMUSG00000004951(Hspb1),ENSMUSG00000005413(Hmox1),ENSMUSG00000005672(Kit),ENSMUSG00000006304(Arpc2),ENSMUSG00000012705(Retn),ENSMUSG00000013076(Amotl1),ENSMUSG00000015533(Itga2),ENSMUSG00000015619(Gata3),ENSMUSG0000001…	ENSMUSG00000000320(Alox12),ENSMUSG00000000567(Sox9),ENSMUSG00000000627(Sema4f),ENSMUSG00000000869(Il4),ENSMUSG00000000957(Mmp14),ENSMUSG00000001435(Col18a1),ENSMUSG00000005533(Igf1r),ENSMUSG00000005824(Tnfsf14),ENSMUSG00000006476(Nsmf),ENSMUSG00000007805(Twist2),ENSMUSG00000008461(Fut1),ENSMUSG00000008601(Rab25),ENSMUSG00000008999(Bmp7),ENSMUSG00000009376(Met),ENSMUSG00000015957(Wnt11),ENSMUSG000…
BP	GO:0043588	skin development	51	58	109	245	4.4e-13	2.61456e-11	ENSMUSG00000001507(Itga3),ENSMUSG00000004207(Psap),ENSMUSG00000005355(Casp14),ENSMUSG00000015533(Itga2),ENSMUSG00000015647(Lama5),ENSMUSG00000020580(Rock2),ENSMUSG00000020656(Grhl1),ENSMUSG00000020857(Nme2),ENSMUSG00000020892(Aloxe3),ENSMUSG00000021054(Sgpp1),ENSMUSG00000021067(Sav1),ENSMUSG00000021477(Ctsl),ENSMUSG00000021765(Fst),ENSMUSG00000022218(Tgm1),ENSMUSG00000022996(Wnt10b),ENSMUSG000000…	ENSMUSG00000000120(Ngfr),ENSMUSG00000000320(Alox12),ENSMUSG00000000567(Sox9),ENSMUSG00000001247(Lsr),ENSMUSG00000001420(Tmem79),ENSMUSG00000007989(Fzd3),ENSMUSG00000009376(Met),ENSMUSG00000020086(Macroh2a2),ENSMUSG00000020140(Lgr5),ENSMUSG00000020758(Itgb4),ENSMUSG00000020891(Alox8),ENSMUSG00000021469(Msx2),ENSMUSG00000022286(Grhl2),ENSMUSG00000022297(Fzd6),ENSMUSG00000022510(Trp63),ENSMUSG000000…
BP	GO:0051093	negative regulation of developmental process	173	182	355	1076	4.7e-13	2.78271e-11	ENSMUSG00000000817(Fasl),ENSMUSG00000001131(Timp1),ENSMUSG00000001227(Sema6b),ENSMUSG00000001517(Foxm1),ENSMUSG00000001627(Ifrd1),ENSMUSG00000002250(Ppard),ENSMUSG00000002603(Tgfb1),ENSMUSG00000002944(Cd36),ENSMUSG00000003032(Klf4),ENSMUSG00000003814(Calr),ENSMUSG00000004460(Dnajb11),ENSMUSG00000005148(Klf5),ENSMUSG00000005161(Prdx2),ENSMUSG00000006050(Sra1),ENSMUSG00000006958(Chrd),ENSMUSG000000…	ENSMUSG00000000120(Ngfr),ENSMUSG00000000126(Wnt9a),ENSMUSG00000000142(Axin2),ENSMUSG00000000567(Sox9),ENSMUSG00000000627(Sema4f),ENSMUSG00000000753(Serpinf1),ENSMUSG00000000861(Bcl11a),ENSMUSG00000000869(Il4),ENSMUSG00000000901(Mmp11),ENSMUSG00000001249(Hpn),ENSMUSG00000001802(Lrp3),ENSMUSG00000002985(Apoe),ENSMUSG00000003934(Efnb3),ENSMUSG00000004939(Nmrk2),ENSMUSG00000005131(4930550C14Rik),ENSM…
BP	GO:0051480	regulation of cytosolic calcium ion concentration	61	99	160	405	5.1e-13	2.99781e-11	ENSMUSG00000000817(Fasl),ENSMUSG00000002015(Bcap31),ENSMUSG00000002603(Tgfb1),ENSMUSG00000002944(Cd36),ENSMUSG00000003657(Calb2),ENSMUSG00000004113(Cacna1b),ENSMUSG00000012819(Cdh23),ENSMUSG00000017446(C1qtnf1),ENSMUSG00000020689(Itgb3),ENSMUSG00000020793(Galr2),ENSMUSG00000020937(Plcd3),ENSMUSG00000021194(Chga),ENSMUSG00000021313(Ryr2),ENSMUSG00000021675(F2rl2),ENSMUSG00000021699(Pde4d),ENSMUSG0…	ENSMUSG00000003352(Cacnb3),ENSMUSG00000004035(Gstm7),ENSMUSG00000006930(Hap1),ENSMUSG00000007122(Casq1),ENSMUSG00000011008(Mcoln2),ENSMUSG00000015968(Cacna1d),ENSMUSG00000017412(Cacnb4),ENSMUSG00000017817(Jph2),ENSMUSG00000019787(Trdn),ENSMUSG00000020123(Avpr1a),ENSMUSG00000020524(Gria1),ENSMUSG00000020787(P2rx1),ENSMUSG00000020866(Cacna1g),ENSMUSG00000021057(Akap5),ENSMUSG00000021070(Bdkrb2),ENS…
BP	GO:0007610	behavior	112	137	249	703	5.1e-13	2.99781e-11	ENSMUSG00000000555(Itga5),ENSMUSG00000000594(Gm2a),ENSMUSG00000001507(Itga3),ENSMUSG00000001751(Naglu),ENSMUSG00000002944(Cd36),ENSMUSG00000004113(Cacna1b),ENSMUSG00000004151(Etv1),ENSMUSG00000004207(Psap),ENSMUSG00000005054(Cstb),ENSMUSG00000005672(Kit),ENSMUSG00000005892(Trh),ENSMUSG00000006589(Aprt),ENSMUSG00000012705(Retn),ENSMUSG00000012819(Cdh23),ENSMUSG00000014030(Pax5),ENSMUSG00000015134(…	ENSMUSG00000000184(Ccnd2),ENSMUSG00000000753(Serpinf1),ENSMUSG00000000889(Dbh),ENSMUSG00000002985(Apoe),ENSMUSG00000003934(Efnb3),ENSMUSG00000005089(Slc1a2),ENSMUSG00000005360(Slc1a3),ENSMUSG00000005705(Agrp),ENSMUSG00000011751(Sptbn4),ENSMUSG00000013089(Etv5),ENSMUSG00000017412(Cacnb4),ENSMUSG00000018581(Dnah11),ENSMUSG00000019326(Aoc3),ENSMUSG00000020123(Avpr1a),ENSMUSG00000020431(Adcy1),ENSMUS…
MF	GO:0005267	potassium channel activity	22	42	64	117	5.5e-13	3.22134e-11	ENSMUSG00000018470(Kcnab3),ENSMUSG00000021730(Hcn1),ENSMUSG00000027273(Snap25),ENSMUSG00000028420(Tmem38b),ENSMUSG00000028931(Kcnab2),ENSMUSG00000032338(Hcn4),ENSMUSG00000033854(Kcnk10),ENSMUSG00000037578(Pkd2l1),ENSMUSG00000037624(Kcnk2),ENSMUSG00000038201(Kcna7),ENSMUSG00000039672(Kcne2),ENSMUSG00000041248(Kcnj1),ENSMUSG00000042529(Kcnj12),ENSMUSG00000045053(Kcng3),ENSMUSG00000047298(Kcnv2),ENS…	ENSMUSG00000000794(Kcnn3),ENSMUSG00000001985(Grik3),ENSMUSG00000002908(Kcnn1),ENSMUSG00000003378(Grik5),ENSMUSG00000004988(Fxyd4),ENSMUSG00000009246(Trpm5),ENSMUSG00000020155(Kcnmb1),ENSMUSG00000023387(Kcnk16),ENSMUSG00000025221(Kcnip2),ENSMUSG00000026961(Lrrc26),ENSMUSG00000027827(Kcnab1),ENSMUSG00000027895(Kcnc4),ENSMUSG00000028631(Kcnq4),ENSMUSG00000029088(Kcnip4),ENSMUSG00000030247(Kcnj8),ENS…
BP	GO:0035150	regulation of tube size	40	38	78	156	6.5e-13	3.79345e-11	ENSMUSG00000000708(Kat2b),ENSMUSG00000002250(Ppard),ENSMUSG00000018500(Adora2b),ENSMUSG00000021194(Chga),ENSMUSG00000021670(Hmgcr),ENSMUSG00000022122(Ednrb),ENSMUSG00000022875(Kng1),ENSMUSG00000025026(Add3),ENSMUSG00000025701(Alox5),ENSMUSG00000026228(Htr2b),ENSMUSG00000026360(Rgs2),ENSMUSG00000027488(Snta1),ENSMUSG00000028001(Fga),ENSMUSG00000028635(Edn2),ENSMUSG00000028978(Nos3),ENSMUSG00000029…	ENSMUSG00000000320(Alox12),ENSMUSG00000000889(Dbh),ENSMUSG00000002985(Apoe),ENSMUSG00000005611(Mrvi1),ENSMUSG00000020123(Avpr1a),ENSMUSG00000020155(Kcnmb1),ENSMUSG00000020787(P2rx1),ENSMUSG00000020838(Slc6a4),ENSMUSG00000020866(Cacna1g),ENSMUSG00000021070(Bdkrb2),ENSMUSG00000021367(Edn1),ENSMUSG00000021678(F2rl1),ENSMUSG00000022994(Adcy6),ENSMUSG00000024039(Cbs),ENSMUSG00000024256(Adcyap1),ENSMUS…
BP	GO:0009611	response to wounding	112	88	200	538	6.8e-13	3.95441e-11	ENSMUSG00000000216(Scnn1g),ENSMUSG00000000555(Itga5),ENSMUSG00000001131(Timp1),ENSMUSG00000001627(Ifrd1),ENSMUSG00000002233(Rhoc),ENSMUSG00000002250(Ppard),ENSMUSG00000002603(Tgfb1),ENSMUSG00000002944(Cd36),ENSMUSG00000003032(Klf4),ENSMUSG00000004383(Large1),ENSMUSG00000005148(Klf5),ENSMUSG00000005161(Prdx2),ENSMUSG00000005413(Hmox1),ENSMUSG00000006574(Slc4a1),ENSMUSG00000006800(Sulf2),ENSMUSG000…	ENSMUSG00000000120(Ngfr),ENSMUSG00000000320(Alox12),ENSMUSG00000001508(Sgca),ENSMUSG00000002985(Apoe),ENSMUSG00000005087(Cd44),ENSMUSG00000005089(Slc1a2),ENSMUSG00000005360(Slc1a3),ENSMUSG00000013236(Ptprs),ENSMUSG00000015085(Entpd2),ENSMUSG00000018340(Anxa6),ENSMUSG00000018924(Alox15),ENSMUSG00000019929(Dcn),ENSMUSG00000019933(Mrln),ENSMUSG00000020758(Itgb4),ENSMUSG00000020787(P2rx1),ENSMUSG0000…
BP	GO:0006814	sodium ion transport	49	48	97	211	7.8e-13	4.51985e-11	ENSMUSG00000000216(Scnn1g),ENSMUSG00000001095(Slc13a2),ENSMUSG00000002603(Tgfb1),ENSMUSG00000006641(Slc5a6),ENSMUSG00000009687(Fxyd5),ENSMUSG00000010064(Slc38a3),ENSMUSG00000014077(Chp1),ENSMUSG00000018900(Slc22a5),ENSMUSG00000019558(Slc6a8),ENSMUSG00000019970(Sgk1),ENSMUSG00000020062(Slc5a8),ENSMUSG00000020226(Slc5a4b),ENSMUSG00000020893(Per1),ENSMUSG00000021335(Slc17a1),ENSMUSG00000021336(Slc17…	ENSMUSG00000004988(Fxyd4),ENSMUSG00000007107(Atp1a4),ENSMUSG00000009246(Trpm5),ENSMUSG00000011751(Sptbn4),ENSMUSG00000019699(Akt3),ENSMUSG00000019894(Slc6a15),ENSMUSG00000020805(Slc13a5),ENSMUSG00000020866(Cacna1g),ENSMUSG00000021553(Slc28a3),ENSMUSG00000021870(Slmap),ENSMUSG00000022523(Fgf12),ENSMUSG00000023945(Slc5a7),ENSMUSG00000024124(Prss30),ENSMUSG00000024354(Slc23a1),ENSMUSG00000024597(Slc…
BP	GO:1901342	regulation of vasculature development	82	57	139	340	8.7e-13	5.02356e-11	ENSMUSG00000000555(Itga5),ENSMUSG00000000628(Hk2),ENSMUSG00000000817(Fasl),ENSMUSG00000002944(Cd36),ENSMUSG00000003032(Klf4),ENSMUSG00000004791(Pgf),ENSMUSG00000004951(Hspb1),ENSMUSG00000005148(Klf5),ENSMUSG00000005413(Hmox1),ENSMUSG00000005672(Kit),ENSMUSG00000015468(Notch4),ENSMUSG00000016918(Sulf1),ENSMUSG00000018593(Sparc),ENSMUSG00000019579(Mydgf),ENSMUSG00000020484(Xbp1),ENSMUSG00000020580(…	ENSMUSG00000000120(Ngfr),ENSMUSG00000000753(Serpinf1),ENSMUSG00000005836(Gata6),ENSMUSG00000008461(Fut1),ENSMUSG00000008855(Hdac5),ENSMUSG00000008999(Bmp7),ENSMUSG00000015340(Cybb),ENSMUSG00000016128(Stard13),ENSMUSG00000018983(E2f2),ENSMUSG00000019699(Akt3),ENSMUSG00000019789(Hey2),ENSMUSG00000019929(Dcn),ENSMUSG00000020676(Ccl11),ENSMUSG00000021835(Bmp4),ENSMUSG00000022225(Cma1),ENSMUSG00000022…
BP	GO:0050896	response to stimulus	1177	1261	2438	9413	9.8e-13	5.6388e-11	ENSMUSG00000000001(Gnai3),ENSMUSG00000000028(Cdc45),ENSMUSG00000000216(Scnn1g),ENSMUSG00000000305(Cdh4),ENSMUSG00000000555(Itga5),ENSMUSG00000000560(Gabra2),ENSMUSG00000000628(Hk2),ENSMUSG00000000706(Btn1a1),ENSMUSG00000000708(Kat2b),ENSMUSG00000000791(Il12rb1),ENSMUSG00000000792(Slc5a5),ENSMUSG00000000817(Fasl),ENSMUSG00000001020(S100a4),ENSMUSG00000001098(Kctd10),ENSMUSG00000001131(Timp1),ENSMU…	ENSMUSG00000000120(Ngfr),ENSMUSG00000000126(Wnt9a),ENSMUSG00000000142(Axin2),ENSMUSG00000000154(Slc22a18),ENSMUSG00000000157(Itgb2l),ENSMUSG00000000184(Ccnd2),ENSMUSG00000000303(Cdh1),ENSMUSG00000000320(Alox12),ENSMUSG00000000562(Adora3),ENSMUSG00000000567(Sox9),ENSMUSG00000000627(Sema4f),ENSMUSG00000000731(Aire),ENSMUSG00000000732(Icosl),ENSMUSG00000000753(Serpinf1),ENSMUSG00000000782(Tcf7),ENSM…
BP	GO:0071363	cellular response to growth factor stimulus	122	109	231	645	1e-12	5.73368e-11	ENSMUSG00000001507(Itga3),ENSMUSG00000002603(Tgfb1),ENSMUSG00000003032(Klf4),ENSMUSG00000003665(Has1),ENSMUSG00000004791(Pgf),ENSMUSG00000004951(Hspb1),ENSMUSG00000006205(Htra1),ENSMUSG00000006304(Arpc2),ENSMUSG00000006800(Sulf2),ENSMUSG00000006958(Chrd),ENSMUSG00000007817(Zmiz1),ENSMUSG00000013629(Cad),ENSMUSG00000015619(Gata3),ENSMUSG00000016918(Sulf1),ENSMUSG00000018593(Sparc),ENSMUSG000000188…	ENSMUSG00000000120(Ngfr),ENSMUSG00000000567(Sox9),ENSMUSG00000001494(Sost),ENSMUSG00000001870(Ltbp1),ENSMUSG00000002384(Bmp8b),ENSMUSG00000004231(Pax2),ENSMUSG00000005087(Cd44),ENSMUSG00000005320(Fgfr4),ENSMUSG00000005836(Gata6),ENSMUSG00000006930(Hap1),ENSMUSG00000008999(Bmp7),ENSMUSG00000010797(Wnt2),ENSMUSG00000018238(Gdf9),ENSMUSG00000019831(Wasf1),ENSMUSG00000019929(Dcn),ENSMUSG00000020919(S…
BP	GO:1901617	organic hydroxy compound biosynthetic process	64	39	103	230	1.2e-12	6.83247e-11	ENSMUSG00000001467(Cyp51),ENSMUSG00000001642(Akr1b3),ENSMUSG00000003752(Itpkc),ENSMUSG00000004709(Cd244a),ENSMUSG00000006517(Mvd),ENSMUSG00000015619(Gata3),ENSMUSG00000018042(Cyb5r3),ENSMUSG00000019139(Isyna1),ENSMUSG00000019301(Hsd17b1),ENSMUSG00000020182(Ddc),ENSMUSG00000020609(Apob),ENSMUSG00000020937(Plcd3),ENSMUSG00000021036(Sptlc2),ENSMUSG00000021214(Akr1c18),ENSMUSG00000021385(Ippk),ENSMUS…	ENSMUSG00000000320(Alox12),ENSMUSG00000000889(Dbh),ENSMUSG00000002985(Apoe),ENSMUSG00000005320(Fgfr4),ENSMUSG00000017754(Pltp),ENSMUSG00000018924(Alox15),ENSMUSG00000020098(Pcbd1),ENSMUSG00000020447(Npc1l1),ENSMUSG00000020889(Nr1d1),ENSMUSG00000023963(Cyp39a1),ENSMUSG00000024030(Abcg1),ENSMUSG00000024112(Cacna1h),ENSMUSG00000027360(Hdc),ENSMUSG00000027596(a),ENSMUSG00000027737(Slc7a11),ENSMUSG000…
BP	GO:0001655	urogenital system development	63	80	143	354	1.2e-12	6.83247e-11	ENSMUSG00000001504(Irx2),ENSMUSG00000001507(Itga3),ENSMUSG00000001642(Akr1b3),ENSMUSG00000002603(Tgfb1),ENSMUSG00000004207(Psap),ENSMUSG00000004791(Pgf),ENSMUSG00000005268(Prlr),ENSMUSG00000006800(Sulf2),ENSMUSG00000015619(Gata3),ENSMUSG00000015647(Lama5),ENSMUSG00000016918(Sulf1),ENSMUSG00000017491(Rarb),ENSMUSG00000019979(Apaf1),ENSMUSG00000020097(Sgpl1),ENSMUSG00000020170(Frs2),ENSMUSG00000020…	ENSMUSG00000000567(Sox9),ENSMUSG00000000753(Serpinf1),ENSMUSG00000001656(Hoxc11),ENSMUSG00000003282(Plag1),ENSMUSG00000004231(Pax2),ENSMUSG00000005958(Ephb3),ENSMUSG00000008999(Bmp7),ENSMUSG00000015957(Wnt11),ENSMUSG00000019929(Dcn),ENSMUSG00000020140(Lgr5),ENSMUSG00000021379(Id4),ENSMUSG00000021466(Ptch1),ENSMUSG00000021835(Bmp4),ENSMUSG00000022144(Gdnf),ENSMUSG00000022330(Osr2),ENSMUSG000000225…
BP	GO:0072001	renal system development	58	71	129	310	1.3e-12	7.37615e-11	ENSMUSG00000001504(Irx2),ENSMUSG00000001507(Itga3),ENSMUSG00000001642(Akr1b3),ENSMUSG00000002603(Tgfb1),ENSMUSG00000004791(Pgf),ENSMUSG00000006800(Sulf2),ENSMUSG00000015619(Gata3),ENSMUSG00000015647(Lama5),ENSMUSG00000016918(Sulf1),ENSMUSG00000017491(Rarb),ENSMUSG00000019979(Apaf1),ENSMUSG00000020097(Sgpl1),ENSMUSG00000020325(Fstl3),ENSMUSG00000020689(Itgb3),ENSMUSG00000020717(Pecam1),ENSMUSG0000…	ENSMUSG00000000567(Sox9),ENSMUSG00000000753(Serpinf1),ENSMUSG00000001656(Hoxc11),ENSMUSG00000004231(Pax2),ENSMUSG00000008999(Bmp7),ENSMUSG00000015957(Wnt11),ENSMUSG00000019929(Dcn),ENSMUSG00000020140(Lgr5),ENSMUSG00000021466(Ptch1),ENSMUSG00000021835(Bmp4),ENSMUSG00000022144(Gdnf),ENSMUSG00000022330(Osr2),ENSMUSG00000024620(Pdgfrb),ENSMUSG00000024922(Ovol1),ENSMUSG00000025352(Gdf11),ENSMUSG000000…
BP	GO:0007417	central nervous system development	133	192	325	976	1.4e-12	7.88876e-11	ENSMUSG00000000001(Gnai3),ENSMUSG00000001751(Naglu),ENSMUSG00000002603(Tgfb1),ENSMUSG00000004207(Psap),ENSMUSG00000004894(Hapln2),ENSMUSG00000005045(Chd5),ENSMUSG00000006958(Chrd),ENSMUSG00000007594(Hapln4),ENSMUSG00000007946(Phox2a),ENSMUSG00000008475(Arpc5),ENSMUSG00000010025(Aldh3a2),ENSMUSG00000010064(Slc38a3),ENSMUSG00000013415(Igf2bp1),ENSMUSG00000014030(Pax5),ENSMUSG00000015134(Aldh1a3),EN…	ENSMUSG00000000120(Ngfr),ENSMUSG00000000303(Cdh1),ENSMUSG00000000416(Cttnbp2),ENSMUSG00000000567(Sox9),ENSMUSG00000001270(Ckb),ENSMUSG00000001911(Nfix),ENSMUSG00000005089(Slc1a2),ENSMUSG00000005958(Ephb3),ENSMUSG00000006930(Hap1),ENSMUSG00000007989(Fzd3),ENSMUSG00000008575(Nfib),ENSMUSG00000008999(Bmp7),ENSMUSG00000010797(Wnt2),ENSMUSG00000011751(Sptbn4),ENSMUSG00000013236(Ptprs),ENSMUSG000000146…
BP	GO:0061061	muscle structure development	117	114	231	647	1.4e-12	7.88876e-11	ENSMUSG00000001627(Ifrd1),ENSMUSG00000002250(Ppard),ENSMUSG00000002603(Tgfb1),ENSMUSG00000003814(Calr),ENSMUSG00000004151(Etv1),ENSMUSG00000004383(Large1),ENSMUSG00000005148(Klf5),ENSMUSG00000005672(Kit),ENSMUSG00000006050(Sra1),ENSMUSG00000006457(Actn3),ENSMUSG00000014030(Pax5),ENSMUSG00000015647(Lama5),ENSMUSG00000015745(Plekho1),ENSMUSG00000017491(Rarb),ENSMUSG00000019848(Popdc3),ENSMUSG000000…	ENSMUSG00000000567(Sox9),ENSMUSG00000000869(Il4),ENSMUSG00000000957(Mmp14),ENSMUSG00000002007(Srpk3),ENSMUSG00000004939(Nmrk2),ENSMUSG00000005628(Tmod4),ENSMUSG00000005824(Tnfsf14),ENSMUSG00000005836(Gata6),ENSMUSG00000007122(Casq1),ENSMUSG00000007877(Tcap),ENSMUSG00000008136(Fhl2),ENSMUSG00000008658(Rbfox1),ENSMUSG00000008855(Hdac5),ENSMUSG00000010797(Wnt2),ENSMUSG00000017412(Cacnb4),ENSMUSG0000…
CC	GO:0043292	contractile fiber	47	59	106	239	1.5e-12	8.4232e-11	ENSMUSG00000000708(Kat2b),ENSMUSG00000004951(Hspb1),ENSMUSG00000006457(Actn3),ENSMUSG00000006574(Slc4a1),ENSMUSG00000020315(Sptbn1),ENSMUSG00000020717(Pecam1),ENSMUSG00000021313(Ryr2),ENSMUSG00000024471(Myot),ENSMUSG00000024803(Ankrd1),ENSMUSG00000025172(Ankrd2),ENSMUSG00000026208(Des),ENSMUSG00000026246(Alppl2),ENSMUSG00000026313(Hdac4),ENSMUSG00000026385(Dbi),ENSMUSG00000026418(Tnni1),ENSMUSG00…	ENSMUSG00000001333(Sync),ENSMUSG00000005628(Tmod4),ENSMUSG00000007122(Casq1),ENSMUSG00000007877(Tcap),ENSMUSG00000008136(Fhl2),ENSMUSG00000015968(Cacna1d),ENSMUSG00000017817(Jph2),ENSMUSG00000019907(Ppp1r12a),ENSMUSG00000020388(Pdlim4),ENSMUSG00000020911(Krt19),ENSMUSG00000021456(Fbp2),ENSMUSG00000021798(Ldb3),ENSMUSG00000021870(Slmap),ENSMUSG00000022358(Fbxo32),ENSMUSG00000024049(Myom1),ENSMUSG0…
MF	GO:0043168	anion binding	392	432	824	2835	1.6e-12	8.95397e-11	ENSMUSG00000000001(Gnai3),ENSMUSG00000000628(Hk2),ENSMUSG00000001403(Ube2c),ENSMUSG00000001473(Tubb6),ENSMUSG00000001773(Folh1),ENSMUSG00000002233(Rhoc),ENSMUSG00000002250(Ppard),ENSMUSG00000002944(Cd36),ENSMUSG00000002957(Ap2a2),ENSMUSG00000003752(Itpkc),ENSMUSG00000003779(Kif20a),ENSMUSG00000004113(Cacna1b),ENSMUSG00000004207(Psap),ENSMUSG00000004668(Abca13),ENSMUSG00000004885(Crabp2),ENSMUSG00…	ENSMUSG00000000308(Ckmt1),ENSMUSG00000000889(Dbh),ENSMUSG00000001270(Ckb),ENSMUSG00000001494(Sost),ENSMUSG00000001583(Tnk1),ENSMUSG00000002007(Srpk3),ENSMUSG00000002012(Pnck),ENSMUSG00000002341(Ncan),ENSMUSG00000002985(Apoe),ENSMUSG00000003411(Rab3b),ENSMUSG00000004032(Gstm5),ENSMUSG00000004035(Gstm7),ENSMUSG00000004085(Map3k20),ENSMUSG00000004187(Kifc2),ENSMUSG00000004347(Pde1c),ENSMUSG000000048…
BP	GO:0015711	organic anion transport	90	81	171	446	1.7e-12	9.44888e-11	ENSMUSG00000000805(Car4),ENSMUSG00000002250(Ppard),ENSMUSG00000002944(Cd36),ENSMUSG00000003153(Slc2a3),ENSMUSG00000004207(Psap),ENSMUSG00000005892(Trh),ENSMUSG00000006574(Slc4a1),ENSMUSG00000006641(Slc5a6),ENSMUSG00000009646(Pla2g12b),ENSMUSG00000010064(Slc38a3),ENSMUSG00000010095(Slc3a2),ENSMUSG00000011884(Gltp),ENSMUSG00000018796(Acsl1),ENSMUSG00000019558(Slc6a8),ENSMUSG00000020062(Slc5a8),ENSM…	ENSMUSG00000002346(Slc25a42),ENSMUSG00000002985(Apoe),ENSMUSG00000003484(Cyp4f18),ENSMUSG00000005089(Slc1a2),ENSMUSG00000005360(Slc1a3),ENSMUSG00000006576(Slc4a3),ENSMUSG00000007034(Slc44a4),ENSMUSG00000009378(Slc16a12),ENSMUSG00000011486(Slc25a41),ENSMUSG00000017412(Cacnb4),ENSMUSG00000017754(Pltp),ENSMUSG00000019894(Slc6a15),ENSMUSG00000020102(Slc16a7),ENSMUSG00000020123(Avpr1a),ENSMUSG00000020…
BP	GO:0042325	regulation of phosphorylation	230	258	488	1573	1.7e-12	9.44888e-11	ENSMUSG00000000555(Itga5),ENSMUSG00000000708(Kat2b),ENSMUSG00000001517(Foxm1),ENSMUSG00000002603(Tgfb1),ENSMUSG00000002944(Cd36),ENSMUSG00000003032(Klf4),ENSMUSG00000004207(Psap),ENSMUSG00000004371(Il11),ENSMUSG00000004791(Pgf),ENSMUSG00000004951(Hspb1),ENSMUSG00000005161(Prdx2),ENSMUSG00000005268(Prlr),ENSMUSG00000005640(Insrr),ENSMUSG00000005672(Kit),ENSMUSG00000006457(Actn3),ENSMUSG00000006574…	ENSMUSG00000000120(Ngfr),ENSMUSG00000000142(Axin2),ENSMUSG00000000184(Ccnd2),ENSMUSG00000000567(Sox9),ENSMUSG00000000869(Il4),ENSMUSG00000000881(Dlg3),ENSMUSG00000001672(Marveld3),ENSMUSG00000002384(Bmp8b),ENSMUSG00000002985(Apoe),ENSMUSG00000003948(Mmd),ENSMUSG00000004085(Map3k20),ENSMUSG00000004558(Ndrg2),ENSMUSG00000005087(Cd44),ENSMUSG00000005320(Fgfr4),ENSMUSG00000005533(Igf1r),ENSMUSG000000…
MF	GO:0015079	potassium ion transmembrane transporter activity	26	47	73	144	2.1e-12	1.16326e-10	ENSMUSG00000018470(Kcnab3),ENSMUSG00000021730(Hcn1),ENSMUSG00000026062(Slc9a2),ENSMUSG00000027273(Snap25),ENSMUSG00000028420(Tmem38b),ENSMUSG00000028854(Slc9a1),ENSMUSG00000028931(Kcnab2),ENSMUSG00000032338(Hcn4),ENSMUSG00000032412(Atp1b3),ENSMUSG00000033854(Kcnk10),ENSMUSG00000037578(Pkd2l1),ENSMUSG00000037624(Kcnk2),ENSMUSG00000038201(Kcna7),ENSMUSG00000039672(Kcne2),ENSMUSG00000040907(Atp1a3),…	ENSMUSG00000000794(Kcnn3),ENSMUSG00000001985(Grik3),ENSMUSG00000002908(Kcnn1),ENSMUSG00000003378(Grik5),ENSMUSG00000004988(Fxyd4),ENSMUSG00000007107(Atp1a4),ENSMUSG00000009246(Trpm5),ENSMUSG00000020155(Kcnmb1),ENSMUSG00000023387(Kcnk16),ENSMUSG00000025221(Kcnip2),ENSMUSG00000026961(Lrrc26),ENSMUSG00000027827(Kcnab1),ENSMUSG00000027895(Kcnc4),ENSMUSG00000028631(Kcnq4),ENSMUSG00000029088(Kcnip4),EN…
BP	GO:0030029	actin filament-based process	116	147	263	761	2.5e-12	1.37551e-10	ENSMUSG00000001864(Aif1l),ENSMUSG00000002233(Rhoc),ENSMUSG00000002565(Scin),ENSMUSG00000002603(Tgfb1),ENSMUSG00000003814(Calr),ENSMUSG00000005057(Sh2b2),ENSMUSG00000005640(Insrr),ENSMUSG00000005672(Kit),ENSMUSG00000006304(Arpc2),ENSMUSG00000008475(Arpc5),ENSMUSG00000009772(Nuak2),ENSMUSG00000013076(Amotl1),ENSMUSG00000015766(Eps8),ENSMUSG00000019359(Gdpd2),ENSMUSG00000019997(Ccn2),ENSMUSG00000020…	ENSMUSG00000001349(Cnn1),ENSMUSG00000005628(Tmod4),ENSMUSG00000007122(Casq1),ENSMUSG00000007877(Tcap),ENSMUSG00000009376(Met),ENSMUSG00000011751(Sptbn4),ENSMUSG00000015957(Wnt11),ENSMUSG00000015968(Cacna1d),ENSMUSG00000018012(Rac3),ENSMUSG00000018126(Baiap2l2),ENSMUSG00000018924(Alox15),ENSMUSG00000019831(Wasf1),ENSMUSG00000019944(Rhobtb1),ENSMUSG00000020388(Pdlim4),ENSMUSG00000020439(Smtn),ENSMU…
BP	GO:0001932	regulation of protein phosphorylation	211	241	452	1443	2.5e-12	1.37551e-10	ENSMUSG00000000555(Itga5),ENSMUSG00000000708(Kat2b),ENSMUSG00000001517(Foxm1),ENSMUSG00000002603(Tgfb1),ENSMUSG00000002944(Cd36),ENSMUSG00000003032(Klf4),ENSMUSG00000004207(Psap),ENSMUSG00000004371(Il11),ENSMUSG00000004791(Pgf),ENSMUSG00000004951(Hspb1),ENSMUSG00000005161(Prdx2),ENSMUSG00000005268(Prlr),ENSMUSG00000005672(Kit),ENSMUSG00000013483(Card14),ENSMUSG00000014077(Chp1),ENSMUSG00000015312…	ENSMUSG00000000120(Ngfr),ENSMUSG00000000142(Axin2),ENSMUSG00000000184(Ccnd2),ENSMUSG00000000567(Sox9),ENSMUSG00000000869(Il4),ENSMUSG00000000881(Dlg3),ENSMUSG00000001672(Marveld3),ENSMUSG00000002384(Bmp8b),ENSMUSG00000002985(Apoe),ENSMUSG00000003948(Mmd),ENSMUSG00000004085(Map3k20),ENSMUSG00000004558(Ndrg2),ENSMUSG00000005087(Cd44),ENSMUSG00000005320(Fgfr4),ENSMUSG00000005533(Igf1r),ENSMUSG000000…
CC	GO:0099634	postsynaptic specialization membrane	14	59	73	145	2.8e-12	1.53026e-10	ENSMUSG00000000560(Gabra2),ENSMUSG00000004951(Hspb1),ENSMUSG00000020598(Nrcam),ENSMUSG00000022494(Shisa9),ENSMUSG00000022602(Arc),ENSMUSG00000024873(Cnih2),ENSMUSG00000025161(Slc16a3),ENSMUSG00000036078(Sigmar1),ENSMUSG00000039579(Grin3a),ENSMUSG00000053930(Shisa6),ENSMUSG00000056073(Grik2),ENSMUSG00000059003(Grin2a),ENSMUSG00000060780(Lrrtm1),ENSMUSG00000062209(Erbb4)	ENSMUSG00000001985(Grik3),ENSMUSG00000002104(Rapsn),ENSMUSG00000003378(Grik5),ENSMUSG00000003872(Lin7b),ENSMUSG00000003934(Efnb3),ENSMUSG00000007653(Gabrb2),ENSMUSG00000013236(Ptprs),ENSMUSG00000019906(Lin7a),ENSMUSG00000020102(Slc16a7),ENSMUSG00000020431(Adcy1),ENSMUSG00000020524(Gria1),ENSMUSG00000021719(Rgs7bp),ENSMUSG00000022758(P2rx6),ENSMUSG00000024304(Cdh2),ENSMUSG00000024617(Camk2a),ENSMU…
CC	GO:0044449	contractile fiber part	40	58	98	217	2.8e-12	1.53026e-10	ENSMUSG00000000708(Kat2b),ENSMUSG00000004951(Hspb1),ENSMUSG00000006457(Actn3),ENSMUSG00000006574(Slc4a1),ENSMUSG00000020315(Sptbn1),ENSMUSG00000020717(Pecam1),ENSMUSG00000021313(Ryr2),ENSMUSG00000024471(Myot),ENSMUSG00000024803(Ankrd1),ENSMUSG00000025172(Ankrd2),ENSMUSG00000026208(Des),ENSMUSG00000026313(Hdac4),ENSMUSG00000026418(Tnni1),ENSMUSG00000026817(Ak1),ENSMUSG00000028116(Myoz2),ENSMUSG000…	ENSMUSG00000001333(Sync),ENSMUSG00000005628(Tmod4),ENSMUSG00000007122(Casq1),ENSMUSG00000007877(Tcap),ENSMUSG00000008136(Fhl2),ENSMUSG00000015968(Cacna1d),ENSMUSG00000017817(Jph2),ENSMUSG00000019907(Ppp1r12a),ENSMUSG00000020388(Pdlim4),ENSMUSG00000020911(Krt19),ENSMUSG00000021456(Fbp2),ENSMUSG00000021798(Ldb3),ENSMUSG00000021870(Slmap),ENSMUSG00000022358(Fbxo32),ENSMUSG00000024049(Myom1),ENSMUSG0…
BP	GO:0019725	cellular homeostasis	153	169	322	971	3.1e-12	1.68857e-10	ENSMUSG00000000628(Hk2),ENSMUSG00000000817(Fasl),ENSMUSG00000001403(Ube2c),ENSMUSG00000002015(Bcap31),ENSMUSG00000002603(Tgfb1),ENSMUSG00000002944(Cd36),ENSMUSG00000003657(Calb2),ENSMUSG00000004113(Cacna1b),ENSMUSG00000004383(Large1),ENSMUSG00000005161(Prdx2),ENSMUSG00000005413(Hmox1),ENSMUSG00000006567(Atp7b),ENSMUSG00000006574(Slc4a1),ENSMUSG00000012819(Cdh23),ENSMUSG00000014077(Chp1),ENSMUSG00…	ENSMUSG00000000120(Ngfr),ENSMUSG00000000753(Serpinf1),ENSMUSG00000001270(Ckb),ENSMUSG00000002985(Apoe),ENSMUSG00000003352(Cacnb3),ENSMUSG00000003378(Grik5),ENSMUSG00000004035(Gstm7),ENSMUSG00000004347(Pde1c),ENSMUSG00000006576(Slc4a3),ENSMUSG00000006930(Hap1),ENSMUSG00000007107(Atp1a4),ENSMUSG00000007122(Casq1),ENSMUSG00000011008(Mcoln2),ENSMUSG00000015968(Cacna1d),ENSMUSG00000017412(Cacnb4),ENSM…
CC	GO:0031224	intrinsic component of membrane	815	1031	1846	6941	3.2e-12	1.73725e-10	ENSMUSG00000000216(Scnn1g),ENSMUSG00000000305(Cdh4),ENSMUSG00000000420(Galnt1),ENSMUSG00000000555(Itga5),ENSMUSG00000000560(Gabra2),ENSMUSG00000000706(Btn1a1),ENSMUSG00000000791(Il12rb1),ENSMUSG00000000792(Slc5a5),ENSMUSG00000000805(Car4),ENSMUSG00000000817(Fasl),ENSMUSG00000001029(Icam2),ENSMUSG00000001095(Slc13a2),ENSMUSG00000001227(Sema6b),ENSMUSG00000001260(Gabrg1),ENSMUSG00000001467(Cyp51),E…	ENSMUSG00000000120(Ngfr),ENSMUSG00000000154(Slc22a18),ENSMUSG00000000157(Itgb2l),ENSMUSG00000000159(Igsf5),ENSMUSG00000000303(Cdh1),ENSMUSG00000000385(Tmprss2),ENSMUSG00000000392(Fap),ENSMUSG00000000562(Adora3),ENSMUSG00000000627(Sema4f),ENSMUSG00000000732(Icosl),ENSMUSG00000000794(Kcnn3),ENSMUSG00000000881(Dlg3),ENSMUSG00000000889(Dbh),ENSMUSG00000000957(Mmp14),ENSMUSG00000001247(Lsr),ENSMUSG000…
BP	GO:0008285	negative regulation of cell proliferation	115	119	234	662	3.3e-12	1.78561e-10	ENSMUSG00000000706(Btn1a1),ENSMUSG00000000708(Kat2b),ENSMUSG00000002250(Ppard),ENSMUSG00000002565(Scin),ENSMUSG00000002603(Tgfb1),ENSMUSG00000003032(Klf4),ENSMUSG00000003271(Sult2b1),ENSMUSG00000005045(Chd5),ENSMUSG00000005125(Ndrg1),ENSMUSG00000005413(Hmox1),ENSMUSG00000015619(Gata3),ENSMUSG00000015812(Gnrh1),ENSMUSG00000016498(Pdcd1lg2),ENSMUSG00000016918(Sulf1),ENSMUSG00000017491(Rarb),ENSMUSG…	ENSMUSG00000000120(Ngfr),ENSMUSG00000000126(Wnt9a),ENSMUSG00000000142(Axin2),ENSMUSG00000000392(Fap),ENSMUSG00000000567(Sox9),ENSMUSG00000000753(Serpinf1),ENSMUSG00000000869(Il4),ENSMUSG00000001249(Hpn),ENSMUSG00000001349(Cnn1),ENSMUSG00000001672(Marveld3),ENSMUSG00000002985(Apoe),ENSMUSG00000004558(Ndrg2),ENSMUSG00000005718(Tfap4),ENSMUSG00000006538(Ihh),ENSMUSG00000008575(Nfib),ENSMUSG000000089…
BP	GO:0001822	kidney development	57	67	124	298	3.5e-12	1.88757e-10	ENSMUSG00000001504(Irx2),ENSMUSG00000001507(Itga3),ENSMUSG00000001642(Akr1b3),ENSMUSG00000002603(Tgfb1),ENSMUSG00000004791(Pgf),ENSMUSG00000006800(Sulf2),ENSMUSG00000015619(Gata3),ENSMUSG00000015647(Lama5),ENSMUSG00000016918(Sulf1),ENSMUSG00000017491(Rarb),ENSMUSG00000019979(Apaf1),ENSMUSG00000020097(Sgpl1),ENSMUSG00000020325(Fstl3),ENSMUSG00000020689(Itgb3),ENSMUSG00000020717(Pecam1),ENSMUSG0000…	ENSMUSG00000000567(Sox9),ENSMUSG00000000753(Serpinf1),ENSMUSG00000001656(Hoxc11),ENSMUSG00000004231(Pax2),ENSMUSG00000008999(Bmp7),ENSMUSG00000015957(Wnt11),ENSMUSG00000019929(Dcn),ENSMUSG00000021466(Ptch1),ENSMUSG00000021835(Bmp4),ENSMUSG00000022144(Gdnf),ENSMUSG00000022330(Osr2),ENSMUSG00000024620(Pdgfrb),ENSMUSG00000024922(Ovol1),ENSMUSG00000025352(Gdf11),ENSMUSG00000025856(Pdgfa),ENSMUSG00000…
BP	GO:0030335	positive regulation of cell migration	110	89	199	543	3.6e-12	1.93512e-10	ENSMUSG00000000555(Itga5),ENSMUSG00000001227(Sema6b),ENSMUSG00000001507(Itga3),ENSMUSG00000002233(Rhoc),ENSMUSG00000002603(Tgfb1),ENSMUSG00000003814(Calr),ENSMUSG00000004791(Pgf),ENSMUSG00000004951(Hspb1),ENSMUSG00000005413(Hmox1),ENSMUSG00000005672(Kit),ENSMUSG00000006304(Arpc2),ENSMUSG00000012705(Retn),ENSMUSG00000013076(Amotl1),ENSMUSG00000015533(Itga2),ENSMUSG00000015619(Gata3),ENSMUSG0000001…	ENSMUSG00000000320(Alox12),ENSMUSG00000000567(Sox9),ENSMUSG00000000627(Sema4f),ENSMUSG00000000869(Il4),ENSMUSG00000000957(Mmp14),ENSMUSG00000001435(Col18a1),ENSMUSG00000005533(Igf1r),ENSMUSG00000005824(Tnfsf14),ENSMUSG00000006476(Nsmf),ENSMUSG00000007805(Twist2),ENSMUSG00000008461(Fut1),ENSMUSG00000008601(Rab25),ENSMUSG00000008999(Bmp7),ENSMUSG00000009376(Met),ENSMUSG00000015957(Wnt11),ENSMUSG000…
CC	GO:0005911	cell-cell junction	66	97	163	422	3.8e-12	2.03593e-10	ENSMUSG00000000325(Arvcf),ENSMUSG00000000555(Itga5),ENSMUSG00000001642(Akr1b3),ENSMUSG00000003657(Calb2),ENSMUSG00000005672(Kit),ENSMUSG00000006567(Atp7b),ENSMUSG00000006574(Slc4a1),ENSMUSG00000012296(Tjap1),ENSMUSG00000013076(Amotl1),ENSMUSG00000019851(Perp),ENSMUSG00000019874(Fabp7),ENSMUSG00000020170(Frs2),ENSMUSG00000020689(Itgb3),ENSMUSG00000020717(Pecam1),ENSMUSG00000022132(Cldn10),ENSMUSG0…	ENSMUSG00000000120(Ngfr),ENSMUSG00000000303(Cdh1),ENSMUSG00000000881(Dlg3),ENSMUSG00000001247(Lsr),ENSMUSG00000001249(Hpn),ENSMUSG00000001508(Sgca),ENSMUSG00000001672(Marveld3),ENSMUSG00000003872(Lin7b),ENSMUSG00000005320(Fgfr4),ENSMUSG00000011751(Sptbn4),ENSMUSG00000017167(Cntnap1),ENSMUSG00000017386(Traf4),ENSMUSG00000017417(Plxdc1),ENSMUSG00000018126(Baiap2l2),ENSMUSG00000018340(Anxa6),ENSMUSG…
CC	GO:0099055	integral component of postsynaptic membrane	17	61	78	160	4.2e-12	2.24288e-10	ENSMUSG00000000560(Gabra2),ENSMUSG00000019558(Slc6a8),ENSMUSG00000020368(Canx),ENSMUSG00000020598(Nrcam),ENSMUSG00000022494(Shisa9),ENSMUSG00000024873(Cnih2),ENSMUSG00000025161(Slc16a3),ENSMUSG00000025496(Drd4),ENSMUSG00000030096(Slc6a6),ENSMUSG00000035566(Pcdh17),ENSMUSG00000039579(Grin3a),ENSMUSG00000042429(Adora1),ENSMUSG00000047976(Kcna1),ENSMUSG00000053930(Shisa6),ENSMUSG00000059003(Grin2a),…	ENSMUSG00000003378(Grik5),ENSMUSG00000003934(Efnb3),ENSMUSG00000007653(Gabrb2),ENSMUSG00000013236(Ptprs),ENSMUSG00000015476(Prrt1),ENSMUSG00000020102(Slc16a7),ENSMUSG00000020431(Adcy1),ENSMUSG00000020524(Gria1),ENSMUSG00000020787(P2rx1),ENSMUSG00000020838(Slc6a4),ENSMUSG00000022758(P2rx6),ENSMUSG00000024304(Cdh2),ENSMUSG00000025892(Gria4),ENSMUSG00000025969(Nrp2),ENSMUSG00000026235(Epha4),ENSMUSG…
MF	GO:0005201	extracellular matrix structural constituent	29	37	66	127	5.5e-12	2.92754e-10	ENSMUSG00000015647(Lama5),ENSMUSG00000018593(Sparc),ENSMUSG00000021702(Thbs4),ENSMUSG00000021806(Nid2),ENSMUSG00000022371(Col14a1),ENSMUSG00000023272(Creld2),ENSMUSG00000024053(Emilin2),ENSMUSG00000026042(Col5a2),ENSMUSG00000026478(Lamc1),ENSMUSG00000027204(Fbn1),ENSMUSG00000027750(Postn),ENSMUSG00000027788(Otol1),ENSMUSG00000027966(Col11a1),ENSMUSG00000028001(Fga),ENSMUSG00000028108(Ecm1),ENSMUS…	ENSMUSG00000001119(Col6a1),ENSMUSG00000001435(Col18a1),ENSMUSG00000001870(Ltbp1),ENSMUSG00000017344(Vtn),ENSMUSG00000019929(Dcn),ENSMUSG00000020241(Col6a2),ENSMUSG00000020902(Ntn1),ENSMUSG00000021388(Aspn),ENSMUSG00000021390(Ogn),ENSMUSG00000024979(Tectb),ENSMUSG00000025064(Col17a1),ENSMUSG00000025650(Col7a1),ENSMUSG00000026574(Dpt),ENSMUSG00000026639(Lamb3),ENSMUSG00000028364(Tnc),ENSMUSG0000003…
BP	GO:0006066	alcohol metabolic process	82	44	126	306	5.6e-12	2.97109e-10	ENSMUSG00000001467(Cyp51),ENSMUSG00000001642(Akr1b3),ENSMUSG00000003271(Sult2b1),ENSMUSG00000003752(Itpkc),ENSMUSG00000004709(Cd244a),ENSMUSG00000006517(Mvd),ENSMUSG00000010025(Aldh3a2),ENSMUSG00000015134(Aldh1a3),ENSMUSG00000018042(Cyb5r3),ENSMUSG00000018861(Fdxr),ENSMUSG00000019139(Isyna1),ENSMUSG00000020609(Apob),ENSMUSG00000020793(Galr2),ENSMUSG00000020937(Plcd3),ENSMUSG00000021036(Sptlc2),EN…	ENSMUSG00000000869(Il4),ENSMUSG00000000889(Dbh),ENSMUSG00000002985(Apoe),ENSMUSG00000012187(Mogat1),ENSMUSG00000020098(Pcbd1),ENSMUSG00000020447(Npc1l1),ENSMUSG00000021779(Thrb),ENSMUSG00000023963(Cyp39a1),ENSMUSG00000024030(Abcg1),ENSMUSG00000024747(Aldh1a7),ENSMUSG00000024843(Chka),ENSMUSG00000025350(Rdh5),ENSMUSG00000025477(Inpp5a),ENSMUSG00000026102(Inpp1),ENSMUSG00000027765(P2ry1),ENSMUSG000…
CC	GO:0031674	I band	30	44	74	150	7.1e-12	3.75473e-10	ENSMUSG00000000708(Kat2b),ENSMUSG00000004951(Hspb1),ENSMUSG00000006457(Actn3),ENSMUSG00000006574(Slc4a1),ENSMUSG00000021313(Ryr2),ENSMUSG00000024471(Myot),ENSMUSG00000024803(Ankrd1),ENSMUSG00000025172(Ankrd2),ENSMUSG00000026208(Des),ENSMUSG00000026313(Hdac4),ENSMUSG00000028116(Myoz2),ENSMUSG00000028273(Pdlim5),ENSMUSG00000028645(Slc2a1),ENSMUSG00000030470(Csrp3),ENSMUSG00000030516(Tjp1),ENSMUSG00…	ENSMUSG00000001333(Sync),ENSMUSG00000007122(Casq1),ENSMUSG00000007877(Tcap),ENSMUSG00000008136(Fhl2),ENSMUSG00000015968(Cacna1d),ENSMUSG00000017817(Jph2),ENSMUSG00000019907(Ppp1r12a),ENSMUSG00000020388(Pdlim4),ENSMUSG00000020911(Krt19),ENSMUSG00000021456(Fbp2),ENSMUSG00000021798(Ldb3),ENSMUSG00000021870(Slmap),ENSMUSG00000022358(Fbxo32),ENSMUSG00000024049(Myom1),ENSMUSG00000026463(Atp2b4),ENSMUSG…
BP	GO:0048732	gland development	104	82	186	503	7.5e-12	3.94076e-10	ENSMUSG00000000628(Hk2),ENSMUSG00000002603(Tgfb1),ENSMUSG00000004207(Psap),ENSMUSG00000005161(Prdx2),ENSMUSG00000005268(Prlr),ENSMUSG00000005413(Hmox1),ENSMUSG00000005891(Prl4a1),ENSMUSG00000006488(Prl7a1),ENSMUSG00000006490(Prl8a9),ENSMUSG00000006567(Atp7b),ENSMUSG00000006589(Aprt),ENSMUSG00000006800(Sulf2),ENSMUSG00000013629(Cad),ENSMUSG00000015134(Aldh1a3),ENSMUSG00000015468(Notch4),ENSMUSG000…	ENSMUSG00000000303(Cdh1),ENSMUSG00000000567(Sox9),ENSMUSG00000000731(Aire),ENSMUSG00000000753(Serpinf1),ENSMUSG00000001247(Lsr),ENSMUSG00000001249(Hpn),ENSMUSG00000003051(Elf3),ENSMUSG00000003282(Plag1),ENSMUSG00000005836(Gata6),ENSMUSG00000005958(Ephb3),ENSMUSG00000006538(Ihh),ENSMUSG00000008575(Nfib),ENSMUSG00000008999(Bmp7),ENSMUSG00000010797(Wnt2),ENSMUSG00000013089(Etv5),ENSMUSG00000015957(W…
BP	GO:0023052	signaling	843	966	1809	6831	7.5e-12	3.94076e-10	ENSMUSG00000000001(Gnai3),ENSMUSG00000000555(Itga5),ENSMUSG00000000560(Gabra2),ENSMUSG00000000706(Btn1a1),ENSMUSG00000000791(Il12rb1),ENSMUSG00000000817(Fasl),ENSMUSG00000001020(S100a4),ENSMUSG00000001098(Kctd10),ENSMUSG00000001131(Timp1),ENSMUSG00000001227(Sema6b),ENSMUSG00000001260(Gabrg1),ENSMUSG00000001507(Itga3),ENSMUSG00000001517(Foxm1),ENSMUSG00000001588(Acap1),ENSMUSG00000001642(Akr1b3),E…	ENSMUSG00000000120(Ngfr),ENSMUSG00000000126(Wnt9a),ENSMUSG00000000142(Axin2),ENSMUSG00000000157(Itgb2l),ENSMUSG00000000303(Cdh1),ENSMUSG00000000562(Adora3),ENSMUSG00000000567(Sox9),ENSMUSG00000000627(Sema4f),ENSMUSG00000000732(Icosl),ENSMUSG00000000782(Tcf7),ENSMUSG00000000869(Il4),ENSMUSG00000000889(Dbh),ENSMUSG00000000957(Mmp14),ENSMUSG00000001334(Fndc5),ENSMUSG00000001494(Sost),ENSMUSG00000001…
BP	GO:0006813	potassium ion transport	37	68	105	242	7.8e-12	4.08525e-10	ENSMUSG00000018470(Kcnab3),ENSMUSG00000020793(Galr2),ENSMUSG00000021730(Hcn1),ENSMUSG00000025351(Cd63),ENSMUSG00000026062(Slc9a2),ENSMUSG00000027273(Snap25),ENSMUSG00000028420(Tmem38b),ENSMUSG00000028854(Slc9a1),ENSMUSG00000028931(Kcnab2),ENSMUSG00000028978(Nos3),ENSMUSG00000029193(Cckar),ENSMUSG00000029380(Cxcl1),ENSMUSG00000032338(Hcn4),ENSMUSG00000032412(Atp1b3),ENSMUSG00000033854(Kcnk10),ENSM…	ENSMUSG00000000794(Kcnn3),ENSMUSG00000001249(Hpn),ENSMUSG00000002908(Kcnn1),ENSMUSG00000004988(Fxyd4),ENSMUSG00000005360(Slc1a3),ENSMUSG00000007107(Atp1a4),ENSMUSG00000009246(Trpm5),ENSMUSG00000015968(Cacna1d),ENSMUSG00000020155(Kcnmb1),ENSMUSG00000021057(Akap5),ENSMUSG00000023387(Kcnk16),ENSMUSG00000024256(Adcyap1),ENSMUSG00000024597(Slc12a2),ENSMUSG00000024907(Gal),ENSMUSG00000025221(Kcnip2),EN…
BP	GO:0097485	neuron projection guidance	45	57	102	233	8.1e-12	4.22882e-10	ENSMUSG00000000305(Cdh4),ENSMUSG00000001227(Sema6b),ENSMUSG00000004151(Etv1),ENSMUSG00000015619(Gata3),ENSMUSG00000020099(Unc5b),ENSMUSG00000020340(Cyfip2),ENSMUSG00000020598(Nrcam),ENSMUSG00000021318(Gli3),ENSMUSG00000021728(Emb),ENSMUSG00000022687(Boc),ENSMUSG00000023473(Celsr3),ENSMUSG00000024471(Myot),ENSMUSG00000024621(Csf1r),ENSMUSG00000025020(Slit1),ENSMUSG00000025085(Ablim1),ENSMUSG000000…	ENSMUSG00000000120(Ngfr),ENSMUSG00000000627(Sema4f),ENSMUSG00000003934(Efnb3),ENSMUSG00000005958(Ephb3),ENSMUSG00000007989(Fzd3),ENSMUSG00000008575(Nfib),ENSMUSG00000008999(Bmp7),ENSMUSG00000014704(Hoxa2),ENSMUSG00000020902(Ntn1),ENSMUSG00000021466(Ptch1),ENSMUSG00000022144(Gdnf),ENSMUSG00000022683(Pla2g10),ENSMUSG00000024366(Gfra3),ENSMUSG00000025478(Dpysl4),ENSMUSG00000025969(Nrp2),ENSMUSG00000…
BP	GO:0007159	leukocyte cell-cell adhesion	80	64	144	365	8.3e-12	4.31944e-10	ENSMUSG00000000555(Itga5),ENSMUSG00000000706(Btn1a1),ENSMUSG00000000791(Il12rb1),ENSMUSG00000002603(Tgfb1),ENSMUSG00000003032(Klf4),ENSMUSG00000004709(Cd244a),ENSMUSG00000005161(Prdx2),ENSMUSG00000006574(Slc4a1),ENSMUSG00000007817(Zmiz1),ENSMUSG00000015619(Gata3),ENSMUSG00000015812(Gnrh1),ENSMUSG00000016498(Pdcd1lg2),ENSMUSG00000017697(Ada),ENSMUSG00000020399(Havcr2),ENSMUSG00000020400(Tnip1),ENS…	ENSMUSG00000000732(Icosl),ENSMUSG00000000782(Tcf7),ENSMUSG00000000869(Il4),ENSMUSG00000003882(Il7r),ENSMUSG00000003934(Efnb3),ENSMUSG00000005087(Cd44),ENSMUSG00000005824(Tnfsf14),ENSMUSG00000006538(Ihh),ENSMUSG00000008999(Bmp7),ENSMUSG00000015396(Cd83),ENSMUSG00000016493(Cd46),ENSMUSG00000019982(Myb),ENSMUSG00000020919(Stat5b),ENSMUSG00000021835(Bmp4),ENSMUSG00000023274(Cd4),ENSMUSG00000024334(H2…
BP	GO:0032940	secretion by cell	150	185	335	1025	8.4e-12	4.3576e-10	ENSMUSG00000000706(Btn1a1),ENSMUSG00000001467(Cyp51),ENSMUSG00000002250(Ppard),ENSMUSG00000002603(Tgfb1),ENSMUSG00000002944(Cd36),ENSMUSG00000004113(Cacna1b),ENSMUSG00000004207(Psap),ENSMUSG00000004371(Il11),ENSMUSG00000004709(Cd244a),ENSMUSG00000005413(Hmox1),ENSMUSG00000005672(Kit),ENSMUSG00000005892(Trh),ENSMUSG00000007659(Bcl2l1),ENSMUSG00000011263(Exoc3l2),ENSMUSG00000012705(Retn),ENSMUSG000…	ENSMUSG00000000869(Il4),ENSMUSG00000000903(Vpreb3),ENSMUSG00000001420(Tmem79),ENSMUSG00000001741(Il16),ENSMUSG00000002985(Apoe),ENSMUSG00000003378(Grik5),ENSMUSG00000003411(Rab3b),ENSMUSG00000003872(Lin7b),ENSMUSG00000004347(Pde1c),ENSMUSG00000006930(Hap1),ENSMUSG00000007034(Slc44a4),ENSMUSG00000007682(Dio2),ENSMUSG00000008601(Rab25),ENSMUSG00000009394(Syn2),ENSMUSG00000011008(Mcoln2),ENSMUSG0000…
CC	GO:0044420	extracellular matrix component	27	40	67	131	8.7e-12	4.49895e-10	ENSMUSG00000001131(Timp1),ENSMUSG00000015647(Lama5),ENSMUSG00000018593(Sparc),ENSMUSG00000020044(Timp3),ENSMUSG00000021702(Thbs4),ENSMUSG00000021806(Nid2),ENSMUSG00000022893(Adamts1),ENSMUSG00000025510(Cd151),ENSMUSG00000026042(Col5a2),ENSMUSG00000026478(Lamc1),ENSMUSG00000027204(Fbn1),ENSMUSG00000027966(Col11a1),ENSMUSG00000028641(P3h1),ENSMUSG00000029368(Alb),ENSMUSG00000029675(Eln),ENSMUSG0000…	ENSMUSG00000000402(Egfl6),ENSMUSG00000000753(Serpinf1),ENSMUSG00000001435(Col18a1),ENSMUSG00000001870(Ltbp1),ENSMUSG00000015085(Entpd2),ENSMUSG00000017344(Vtn),ENSMUSG00000020019(Ntn4),ENSMUSG00000020758(Itgb4),ENSMUSG00000020902(Ntn1),ENSMUSG00000022665(Ccdc80),ENSMUSG00000023885(Thbs2),ENSMUSG00000024299(Adamts10),ENSMUSG00000025064(Col17a1),ENSMUSG00000025068(Gsto1),ENSMUSG00000025082(Vwa2),EN…
BP	GO:0044093	positive regulation of molecular function	259	261	520	1708	8.8e-12	4.5363e-10	ENSMUSG00000000001(Gnai3),ENSMUSG00000000594(Gm2a),ENSMUSG00000000708(Kat2b),ENSMUSG00000000817(Fasl),ENSMUSG00000001588(Acap1),ENSMUSG00000001627(Ifrd1),ENSMUSG00000001995(Sipa1l2),ENSMUSG00000002015(Bcap31),ENSMUSG00000002233(Rhoc),ENSMUSG00000002250(Ppard),ENSMUSG00000002603(Tgfb1),ENSMUSG00000002944(Cd36),ENSMUSG00000003032(Klf4),ENSMUSG00000004207(Psap),ENSMUSG00000004460(Dnajb11),ENSMUSG000…	ENSMUSG00000000120(Ngfr),ENSMUSG00000000142(Axin2),ENSMUSG00000000184(Ccnd2),ENSMUSG00000000320(Alox12),ENSMUSG00000000730(Dnmt3l),ENSMUSG00000000869(Il4),ENSMUSG00000000881(Dlg3),ENSMUSG00000002459(Rgs20),ENSMUSG00000002985(Apoe),ENSMUSG00000003352(Cacnb3),ENSMUSG00000003948(Mmd),ENSMUSG00000004035(Gstm7),ENSMUSG00000004085(Map3k20),ENSMUSG00000005251(Ripk4),ENSMUSG00000005320(Fgfr4),ENSMUSG0000…
CC	GO:0009897	external side of plasma membrane	74	85	159	413	9.5e-12	4.88175e-10	ENSMUSG00000000216(Scnn1g),ENSMUSG00000000555(Itga5),ENSMUSG00000000706(Btn1a1),ENSMUSG00000000791(Il12rb1),ENSMUSG00000000805(Car4),ENSMUSG00000000817(Fasl),ENSMUSG00000001507(Itga3),ENSMUSG00000002944(Cd36),ENSMUSG00000003814(Calr),ENSMUSG00000004709(Cd244a),ENSMUSG00000005268(Prlr),ENSMUSG00000005672(Kit),ENSMUSG00000015533(Itga2),ENSMUSG00000016498(Pdcd1lg2),ENSMUSG00000017697(Ada),ENSMUSG000…	ENSMUSG00000000120(Ngfr),ENSMUSG00000000732(Icosl),ENSMUSG00000000869(Il4),ENSMUSG00000002985(Apoe),ENSMUSG00000003379(Cd79a),ENSMUSG00000003882(Il7r),ENSMUSG00000004730(Adgre1),ENSMUSG00000005947(Itgae),ENSMUSG00000006576(Slc4a3),ENSMUSG00000010797(Wnt2),ENSMUSG00000015396(Cd83),ENSMUSG00000018566(Slc2a4),ENSMUSG00000019989(Enpp3),ENSMUSG00000020787(P2rx1),ENSMUSG00000022103(Gfra2),ENSMUSG000000…
MF	GO:0022843	voltage-gated cation channel activity	22	45	67	131	9.8e-12	5.00443e-10	ENSMUSG00000004113(Cacna1b),ENSMUSG00000018470(Kcnab3),ENSMUSG00000020722(Cacng1),ENSMUSG00000021730(Hcn1),ENSMUSG00000027273(Snap25),ENSMUSG00000028931(Kcnab2),ENSMUSG00000032338(Hcn4),ENSMUSG00000037624(Kcnk2),ENSMUSG00000038201(Kcna7),ENSMUSG00000039672(Kcne2),ENSMUSG00000041248(Kcnj1),ENSMUSG00000042529(Kcnj12),ENSMUSG00000045053(Kcng3),ENSMUSG00000047298(Kcnv2),ENSMUSG00000047976(Kcna1),ENSM…	ENSMUSG00000003352(Cacnb3),ENSMUSG00000004110(Cacna1e),ENSMUSG00000015968(Cacna1d),ENSMUSG00000017412(Cacnb4),ENSMUSG00000020866(Cacna1g),ENSMUSG00000020882(Cacnb1),ENSMUSG00000024112(Cacna1h),ENSMUSG00000025221(Kcnip2),ENSMUSG00000026961(Lrrc26),ENSMUSG00000027827(Kcnab1),ENSMUSG00000027895(Kcnc4),ENSMUSG00000028631(Kcnq4),ENSMUSG00000030247(Kcnj8),ENSMUSG00000030592(Ryr1),ENSMUSG00000033998(Kcn…
BP	GO:0048589	developmental growth	119	131	250	724	9.8e-12	5.00443e-10	ENSMUSG00000000305(Cdh4),ENSMUSG00000001227(Sema6b),ENSMUSG00000001627(Ifrd1),ENSMUSG00000002250(Ppard),ENSMUSG00000002603(Tgfb1),ENSMUSG00000004207(Psap),ENSMUSG00000004383(Large1),ENSMUSG00000004885(Crabp2),ENSMUSG00000005148(Klf5),ENSMUSG00000005268(Prlr),ENSMUSG00000006457(Actn3),ENSMUSG00000007817(Zmiz1),ENSMUSG00000010760(Phlda2),ENSMUSG00000015619(Gata3),ENSMUSG00000017491(Rarb),ENSMUSG000…	ENSMUSG00000000567(Sox9),ENSMUSG00000000627(Sema4f),ENSMUSG00000000861(Bcl11a),ENSMUSG00000001119(Col6a1),ENSMUSG00000001508(Sgca),ENSMUSG00000002985(Apoe),ENSMUSG00000003282(Plag1),ENSMUSG00000005089(Slc1a2),ENSMUSG00000005836(Gata6),ENSMUSG00000006538(Ihh),ENSMUSG00000010797(Wnt2),ENSMUSG00000011751(Sptbn4),ENSMUSG00000013236(Ptprs),ENSMUSG00000015222(Map2),ENSMUSG00000015957(Wnt11),ENSMUSG0000…
BP	GO:0001934	positive regulation of protein phosphorylation	151	178	329	1005	1e-11	5.09065e-10	ENSMUSG00000000555(Itga5),ENSMUSG00000002603(Tgfb1),ENSMUSG00000002944(Cd36),ENSMUSG00000004207(Psap),ENSMUSG00000004371(Il11),ENSMUSG00000004791(Pgf),ENSMUSG00000005161(Prdx2),ENSMUSG00000005268(Prlr),ENSMUSG00000005672(Kit),ENSMUSG00000013483(Card14),ENSMUSG00000015312(Gadd45b),ENSMUSG00000017446(C1qtnf1),ENSMUSG00000017950(Hnf4a),ENSMUSG00000018334(Ksr1),ENSMUSG00000018796(Acsl1),ENSMUSG000000…	ENSMUSG00000000120(Ngfr),ENSMUSG00000000142(Axin2),ENSMUSG00000000184(Ccnd2),ENSMUSG00000000567(Sox9),ENSMUSG00000000869(Il4),ENSMUSG00000000881(Dlg3),ENSMUSG00000002384(Bmp8b),ENSMUSG00000002985(Apoe),ENSMUSG00000003948(Mmd),ENSMUSG00000004085(Map3k20),ENSMUSG00000005087(Cd44),ENSMUSG00000005320(Fgfr4),ENSMUSG00000008999(Bmp7),ENSMUSG00000013921(Clip3),ENSMUSG00000015950(Ncf1),ENSMUSG00000015957…
MF	GO:0015081	sodium ion transmembrane transporter activity	33	39	72	145	1.1e-11	5.54787e-10	ENSMUSG00000000216(Scnn1g),ENSMUSG00000000792(Slc5a5),ENSMUSG00000006641(Slc5a6),ENSMUSG00000019558(Slc6a8),ENSMUSG00000020062(Slc5a8),ENSMUSG00000020226(Slc5a4b),ENSMUSG00000021730(Hcn1),ENSMUSG00000023033(Scn8a),ENSMUSG00000024485(Slc4a9),ENSMUSG00000026062(Slc9a2),ENSMUSG00000027340(Slc23a2),ENSMUSG00000027397(Slc20a1),ENSMUSG00000028854(Slc9a1),ENSMUSG00000029321(Slc10a6),ENSMUSG00000029843(S…	ENSMUSG00000001985(Grik3),ENSMUSG00000003378(Grik5),ENSMUSG00000005089(Slc1a2),ENSMUSG00000005360(Slc1a3),ENSMUSG00000007107(Atp1a4),ENSMUSG00000009246(Trpm5),ENSMUSG00000019894(Slc6a15),ENSMUSG00000020805(Slc13a5),ENSMUSG00000020838(Slc6a4),ENSMUSG00000020866(Cacna1g),ENSMUSG00000021553(Slc28a3),ENSMUSG00000023828(Slc22a3),ENSMUSG00000023829(Slc22a1),ENSMUSG00000023945(Slc5a7),ENSMUSG00000024354…
BP	GO:0044283	small molecule biosynthetic process	119	73	192	525	1.1e-11	5.54787e-10	ENSMUSG00000000708(Kat2b),ENSMUSG00000001467(Cyp51),ENSMUSG00000001642(Akr1b3),ENSMUSG00000002603(Tgfb1),ENSMUSG00000003665(Has1),ENSMUSG00000003752(Itpkc),ENSMUSG00000004709(Cd244a),ENSMUSG00000004885(Crabp2),ENSMUSG00000006345(Ggt1),ENSMUSG00000006517(Mvd),ENSMUSG00000013629(Cad),ENSMUSG00000015134(Aldh1a3),ENSMUSG00000017950(Hnf4a),ENSMUSG00000018042(Cyb5r3),ENSMUSG00000018861(Fdxr),ENSMUSG000…	ENSMUSG00000000320(Alox12),ENSMUSG00000000889(Dbh),ENSMUSG00000002985(Apoe),ENSMUSG00000005320(Fgfr4),ENSMUSG00000005360(Slc1a3),ENSMUSG00000007908(Hmgcll1),ENSMUSG00000009350(Mpo),ENSMUSG00000015568(Lpl),ENSMUSG00000017754(Pltp),ENSMUSG00000018907(Alox12e),ENSMUSG00000018924(Alox15),ENSMUSG00000020098(Pcbd1),ENSMUSG00000020123(Avpr1a),ENSMUSG00000020447(Npc1l1),ENSMUSG00000020889(Nr1d1),ENSMUSG0…
BP	GO:0007411	axon guidance	45	56	101	231	1.1e-11	5.54787e-10	ENSMUSG00000000305(Cdh4),ENSMUSG00000001227(Sema6b),ENSMUSG00000004151(Etv1),ENSMUSG00000015619(Gata3),ENSMUSG00000020099(Unc5b),ENSMUSG00000020340(Cyfip2),ENSMUSG00000020598(Nrcam),ENSMUSG00000021318(Gli3),ENSMUSG00000021728(Emb),ENSMUSG00000022687(Boc),ENSMUSG00000023473(Celsr3),ENSMUSG00000024471(Myot),ENSMUSG00000024621(Csf1r),ENSMUSG00000025020(Slit1),ENSMUSG00000025085(Ablim1),ENSMUSG000000…	ENSMUSG00000000120(Ngfr),ENSMUSG00000000627(Sema4f),ENSMUSG00000003934(Efnb3),ENSMUSG00000005958(Ephb3),ENSMUSG00000007989(Fzd3),ENSMUSG00000008575(Nfib),ENSMUSG00000008999(Bmp7),ENSMUSG00000014704(Hoxa2),ENSMUSG00000020902(Ntn1),ENSMUSG00000021466(Ptch1),ENSMUSG00000022144(Gdnf),ENSMUSG00000022683(Pla2g10),ENSMUSG00000024366(Gfra3),ENSMUSG00000025969(Nrp2),ENSMUSG00000026109(Tmeff2),ENSMUSG00000…
BP	GO:0007154	cell communication	857	965	1822	6892	1.2e-11	6.0336e-10	ENSMUSG00000000001(Gnai3),ENSMUSG00000000555(Itga5),ENSMUSG00000000560(Gabra2),ENSMUSG00000000706(Btn1a1),ENSMUSG00000000791(Il12rb1),ENSMUSG00000000817(Fasl),ENSMUSG00000001020(S100a4),ENSMUSG00000001098(Kctd10),ENSMUSG00000001131(Timp1),ENSMUSG00000001227(Sema6b),ENSMUSG00000001260(Gabrg1),ENSMUSG00000001507(Itga3),ENSMUSG00000001517(Foxm1),ENSMUSG00000001588(Acap1),ENSMUSG00000001642(Akr1b3),E…	ENSMUSG00000000120(Ngfr),ENSMUSG00000000126(Wnt9a),ENSMUSG00000000142(Axin2),ENSMUSG00000000157(Itgb2l),ENSMUSG00000000303(Cdh1),ENSMUSG00000000562(Adora3),ENSMUSG00000000567(Sox9),ENSMUSG00000000627(Sema4f),ENSMUSG00000000732(Icosl),ENSMUSG00000000782(Tcf7),ENSMUSG00000000869(Il4),ENSMUSG00000000889(Dbh),ENSMUSG00000000957(Mmp14),ENSMUSG00000001334(Fndc5),ENSMUSG00000001494(Sost),ENSMUSG00000001…
BP	GO:0051047	positive regulation of secretion	98	89	187	509	1.3e-11	6.47662e-10	ENSMUSG00000002250(Ppard),ENSMUSG00000002603(Tgfb1),ENSMUSG00000002944(Cd36),ENSMUSG00000004113(Cacna1b),ENSMUSG00000004709(Cd244a),ENSMUSG00000005891(Prl4a1),ENSMUSG00000005892(Trh),ENSMUSG00000006488(Prl7a1),ENSMUSG00000006490(Prl8a9),ENSMUSG00000007659(Bcl2l1),ENSMUSG00000012705(Retn),ENSMUSG00000015619(Gata3),ENSMUSG00000017064(Prl5a1),ENSMUSG00000017446(C1qtnf1),ENSMUSG00000017922(Prl3c1),EN…	ENSMUSG00000000869(Il4),ENSMUSG00000001741(Il16),ENSMUSG00000003484(Cyp4f18),ENSMUSG00000014453(Blk),ENSMUSG00000015568(Lpl),ENSMUSG00000015966(Il17rb),ENSMUSG00000015968(Cacna1d),ENSMUSG00000017412(Cacnb4),ENSMUSG00000017978(Cadps2),ENSMUSG00000019982(Myb),ENSMUSG00000020123(Avpr1a),ENSMUSG00000020684(Rasl10b),ENSMUSG00000020838(Slc6a4),ENSMUSG00000020847(Rph3al),ENSMUSG00000020848(Doc2b),ENSMUS…
BP	GO:0048667	cell morphogenesis involved in neuron differentiation	82	130	212	594	1.3e-11	6.47662e-10	ENSMUSG00000000305(Cdh4),ENSMUSG00000001227(Sema6b),ENSMUSG00000001627(Ifrd1),ENSMUSG00000004151(Etv1),ENSMUSG00000004885(Crabp2),ENSMUSG00000012819(Cdh23),ENSMUSG00000015619(Gata3),ENSMUSG00000017929(B4galt5),ENSMUSG00000019970(Sgk1),ENSMUSG00000020099(Unc5b),ENSMUSG00000020340(Cyfip2),ENSMUSG00000020598(Nrcam),ENSMUSG00000021068(Nin),ENSMUSG00000021318(Gli3),ENSMUSG00000021728(Emb),ENSMUSG00000…	ENSMUSG00000000120(Ngfr),ENSMUSG00000000627(Sema4f),ENSMUSG00000000861(Bcl11a),ENSMUSG00000002985(Apoe),ENSMUSG00000003934(Efnb3),ENSMUSG00000005360(Slc1a3),ENSMUSG00000005958(Ephb3),ENSMUSG00000006476(Nsmf),ENSMUSG00000007989(Fzd3),ENSMUSG00000008575(Nfib),ENSMUSG00000008999(Bmp7),ENSMUSG00000011751(Sptbn4),ENSMUSG00000013236(Ptprs),ENSMUSG00000014602(Kif1a),ENSMUSG00000014704(Hoxa2),ENSMUSG0000…
BP	GO:0050769	positive regulation of neurogenesis	76	126	202	560	1.3e-11	6.47662e-10	ENSMUSG00000000305(Cdh4),ENSMUSG00000000708(Kat2b),ENSMUSG00000001507(Itga3),ENSMUSG00000002603(Tgfb1),ENSMUSG00000004031(Brinp2),ENSMUSG00000004885(Crabp2),ENSMUSG00000004951(Hspb1),ENSMUSG00000005672(Kit),ENSMUSG00000017491(Rarb),ENSMUSG00000019970(Sgk1),ENSMUSG00000020857(Nme2),ENSMUSG00000021068(Nin),ENSMUSG00000021318(Gli3),ENSMUSG00000021782(Dlg5),ENSMUSG00000022212(Cpne6),ENSMUSG0000002289…	ENSMUSG00000000120(Ngfr),ENSMUSG00000000753(Serpinf1),ENSMUSG00000000861(Bcl11a),ENSMUSG00000002985(Apoe),ENSMUSG00000003282(Plag1),ENSMUSG00000003948(Mmd),ENSMUSG00000006476(Nsmf),ENSMUSG00000006930(Hap1),ENSMUSG00000007989(Fzd3),ENSMUSG00000008999(Bmp7),ENSMUSG00000010086(Rnf112),ENSMUSG00000010797(Wnt2),ENSMUSG00000013089(Etv5),ENSMUSG00000019178(Styxl1),ENSMUSG00000019982(Myb),ENSMUSG00000020…
BP	GO:0006629	lipid metabolic process	234	171	405	1284	1.4e-11	6.9116e-10	ENSMUSG00000000594(Gm2a),ENSMUSG00000000686(Abhd15),ENSMUSG00000001467(Cyp51),ENSMUSG00000001588(Acap1),ENSMUSG00000001642(Akr1b3),ENSMUSG00000002250(Ppard),ENSMUSG00000002603(Tgfb1),ENSMUSG00000002847(Pla1a),ENSMUSG00000002944(Cd36),ENSMUSG00000003032(Klf4),ENSMUSG00000003271(Sult2b1),ENSMUSG00000004207(Psap),ENSMUSG00000004885(Crabp2),ENSMUSG00000005672(Kit),ENSMUSG00000006345(Ggt1),ENSMUSG0000…	ENSMUSG00000000320(Alox12),ENSMUSG00000000869(Il4),ENSMUSG00000001247(Lsr),ENSMUSG00000002289(Angptl4),ENSMUSG00000002475(Abhd3),ENSMUSG00000002985(Apoe),ENSMUSG00000003484(Cyp4f18),ENSMUSG00000004035(Gstm7),ENSMUSG00000005320(Fgfr4),ENSMUSG00000005836(Gata6),ENSMUSG00000007908(Hmgcll1),ENSMUSG00000012187(Mogat1),ENSMUSG00000015568(Lpl),ENSMUSG00000016349(Eef1a2),ENSMUSG00000017754(Pltp),ENSMUSG0…
BP	GO:0072511	divalent inorganic cation transport	73	110	183	496	1.4e-11	6.9116e-10	ENSMUSG00000000817(Fasl),ENSMUSG00000002603(Tgfb1),ENSMUSG00000004113(Cacna1b),ENSMUSG00000006567(Atp7b),ENSMUSG00000012819(Cdh23),ENSMUSG00000017400(Stac2),ENSMUSG00000019997(Ccn2),ENSMUSG00000020411(Nipal4),ENSMUSG00000020689(Itgb3),ENSMUSG00000020722(Cacng1),ENSMUSG00000020907(Rcvrn),ENSMUSG00000020937(Plcd3),ENSMUSG00000021313(Ryr2),ENSMUSG00000021699(Pde4d),ENSMUSG00000021831(Ero1l),ENSMUSG0…	ENSMUSG00000001741(Il16),ENSMUSG00000003352(Cacnb3),ENSMUSG00000004035(Gstm7),ENSMUSG00000004110(Cacna1e),ENSMUSG00000006930(Hap1),ENSMUSG00000007122(Casq1),ENSMUSG00000011008(Mcoln2),ENSMUSG00000015968(Cacna1d),ENSMUSG00000017412(Cacnb4),ENSMUSG00000017817(Jph2),ENSMUSG00000018340(Anxa6),ENSMUSG00000019787(Trdn),ENSMUSG00000019933(Mrln),ENSMUSG00000019982(Myb),ENSMUSG00000020577(Tspan13),ENSMUSG…
CC	GO:0098839	postsynaptic density membrane	12	45	57	105	1.4e-11	6.9116e-10	ENSMUSG00000004951(Hspb1),ENSMUSG00000020598(Nrcam),ENSMUSG00000022494(Shisa9),ENSMUSG00000022602(Arc),ENSMUSG00000024873(Cnih2),ENSMUSG00000025161(Slc16a3),ENSMUSG00000036078(Sigmar1),ENSMUSG00000039579(Grin3a),ENSMUSG00000053930(Shisa6),ENSMUSG00000056073(Grik2),ENSMUSG00000059003(Grin2a),ENSMUSG00000062209(Erbb4)	ENSMUSG00000001985(Grik3),ENSMUSG00000003378(Grik5),ENSMUSG00000003872(Lin7b),ENSMUSG00000003934(Efnb3),ENSMUSG00000013236(Ptprs),ENSMUSG00000019906(Lin7a),ENSMUSG00000020102(Slc16a7),ENSMUSG00000020431(Adcy1),ENSMUSG00000020524(Gria1),ENSMUSG00000021719(Rgs7bp),ENSMUSG00000025658(Cnksr2),ENSMUSG00000025892(Gria4),ENSMUSG00000026235(Epha4),ENSMUSG00000028289(Epha7),ENSMUSG00000029093(Sorcs2),ENSM…
CC	GO:0098936	intrinsic component of postsynaptic membrane	17	63	80	169	1.5e-11	7.38298e-10	ENSMUSG00000000560(Gabra2),ENSMUSG00000019558(Slc6a8),ENSMUSG00000020368(Canx),ENSMUSG00000020598(Nrcam),ENSMUSG00000022494(Shisa9),ENSMUSG00000024873(Cnih2),ENSMUSG00000025161(Slc16a3),ENSMUSG00000025496(Drd4),ENSMUSG00000030096(Slc6a6),ENSMUSG00000035566(Pcdh17),ENSMUSG00000039579(Grin3a),ENSMUSG00000042429(Adora1),ENSMUSG00000047976(Kcna1),ENSMUSG00000053930(Shisa6),ENSMUSG00000059003(Grin2a),…	ENSMUSG00000003378(Grik5),ENSMUSG00000003934(Efnb3),ENSMUSG00000007653(Gabrb2),ENSMUSG00000013236(Ptprs),ENSMUSG00000015476(Prrt1),ENSMUSG00000020102(Slc16a7),ENSMUSG00000020431(Adcy1),ENSMUSG00000020524(Gria1),ENSMUSG00000020787(P2rx1),ENSMUSG00000020838(Slc6a4),ENSMUSG00000021719(Rgs7bp),ENSMUSG00000022758(P2rx6),ENSMUSG00000024304(Cdh2),ENSMUSG00000025892(Gria4),ENSMUSG00000025969(Nrp2),ENSMUS…
MF	GO:0005539	glycosaminoglycan binding	40	51	91	201	1.7e-11	8.34225e-10	ENSMUSG00000004894(Hapln2),ENSMUSG00000006800(Sulf2),ENSMUSG00000006958(Chrd),ENSMUSG00000007594(Hapln4),ENSMUSG00000016918(Sulf1),ENSMUSG00000018623(Mmp7),ENSMUSG00000019997(Ccn2),ENSMUSG00000020330(Hmmr),ENSMUSG00000020609(Apob),ENSMUSG00000021702(Thbs4),ENSMUSG00000022816(Fstl1),ENSMUSG00000022893(Adamts1),ENSMUSG00000022894(Adamts5),ENSMUSG00000025020(Slit1),ENSMUSG00000026580(Selp),ENSMUSG00…	ENSMUSG00000001494(Sost),ENSMUSG00000002341(Ncan),ENSMUSG00000002985(Apoe),ENSMUSG00000005087(Cd44),ENSMUSG00000005320(Fgfr4),ENSMUSG00000008999(Bmp7),ENSMUSG00000009350(Mpo),ENSMUSG00000013236(Ptprs),ENSMUSG00000015568(Lpl),ENSMUSG00000017344(Vtn),ENSMUSG00000018340(Anxa6),ENSMUSG00000019880(Rspo3),ENSMUSG00000019929(Dcn),ENSMUSG00000021466(Ptch1),ENSMUSG00000021835(Bmp4),ENSMUSG00000022523(Fgf1…
BP	GO:0010941	regulation of cell death	263	253	516	1700	1.8e-11	8.80653e-10	ENSMUSG00000000001(Gnai3),ENSMUSG00000000555(Itga5),ENSMUSG00000000817(Fasl),ENSMUSG00000001131(Timp1),ENSMUSG00000001642(Akr1b3),ENSMUSG00000001773(Folh1),ENSMUSG00000002015(Bcap31),ENSMUSG00000002250(Ppard),ENSMUSG00000002565(Scin),ENSMUSG00000002603(Tgfb1),ENSMUSG00000002944(Cd36),ENSMUSG00000003032(Klf4),ENSMUSG00000003541(Ier3),ENSMUSG00000004207(Psap),ENSMUSG00000004535(Tax1bp1),ENSMUSG0000…	ENSMUSG00000000120(Ngfr),ENSMUSG00000000126(Wnt9a),ENSMUSG00000000142(Axin2),ENSMUSG00000000184(Ccnd2),ENSMUSG00000000308(Ckmt1),ENSMUSG00000000320(Alox12),ENSMUSG00000000392(Fap),ENSMUSG00000000567(Sox9),ENSMUSG00000000753(Serpinf1),ENSMUSG00000000782(Tcf7),ENSMUSG00000000869(Il4),ENSMUSG00000000889(Dbh),ENSMUSG00000001249(Hpn),ENSMUSG00000001435(Col18a1),ENSMUSG00000002104(Rapsn),ENSMUSG0000000…
BP	GO:0070838	divalent metal ion transport	72	109	181	491	1.9e-11	9.24045e-10	ENSMUSG00000000817(Fasl),ENSMUSG00000002603(Tgfb1),ENSMUSG00000004113(Cacna1b),ENSMUSG00000012819(Cdh23),ENSMUSG00000017400(Stac2),ENSMUSG00000019997(Ccn2),ENSMUSG00000020411(Nipal4),ENSMUSG00000020689(Itgb3),ENSMUSG00000020722(Cacng1),ENSMUSG00000020907(Rcvrn),ENSMUSG00000020937(Plcd3),ENSMUSG00000021313(Ryr2),ENSMUSG00000021699(Pde4d),ENSMUSG00000021831(Ero1l),ENSMUSG00000022094(Slc39a14),ENSMU…	ENSMUSG00000001741(Il16),ENSMUSG00000003352(Cacnb3),ENSMUSG00000004035(Gstm7),ENSMUSG00000004110(Cacna1e),ENSMUSG00000006930(Hap1),ENSMUSG00000007122(Casq1),ENSMUSG00000011008(Mcoln2),ENSMUSG00000015968(Cacna1d),ENSMUSG00000017412(Cacnb4),ENSMUSG00000017817(Jph2),ENSMUSG00000018340(Anxa6),ENSMUSG00000019787(Trdn),ENSMUSG00000019933(Mrln),ENSMUSG00000019982(Myb),ENSMUSG00000020577(Tspan13),ENSMUSG…
CC	GO:0005578	proteinaceous extracellular matrix	27	39	66	130	1.9e-11	9.24045e-10	ENSMUSG00000001131(Timp1),ENSMUSG00000015647(Lama5),ENSMUSG00000018593(Sparc),ENSMUSG00000020044(Timp3),ENSMUSG00000021702(Thbs4),ENSMUSG00000021806(Nid2),ENSMUSG00000022371(Col14a1),ENSMUSG00000022893(Adamts1),ENSMUSG00000025213(Kazald1),ENSMUSG00000025510(Cd151),ENSMUSG00000026042(Col5a2),ENSMUSG00000026478(Lamc1),ENSMUSG00000027204(Fbn1),ENSMUSG00000027966(Col11a1),ENSMUSG00000028641(P3h1),ENS…	ENSMUSG00000000402(Egfl6),ENSMUSG00000000753(Serpinf1),ENSMUSG00000001435(Col18a1),ENSMUSG00000015085(Entpd2),ENSMUSG00000017344(Vtn),ENSMUSG00000020019(Ntn4),ENSMUSG00000020758(Itgb4),ENSMUSG00000020902(Ntn1),ENSMUSG00000022665(Ccdc80),ENSMUSG00000023885(Thbs2),ENSMUSG00000024076(Vit),ENSMUSG00000025064(Col17a1),ENSMUSG00000025068(Gsto1),ENSMUSG00000025082(Vwa2),ENSMUSG00000025650(Col7a1),ENSMUS…
BP	GO:0045785	positive regulation of cell adhesion	79	76	155	405	2.1e-11	1.01828e-09	ENSMUSG00000000555(Itga5),ENSMUSG00000000791(Il12rb1),ENSMUSG00000001507(Itga3),ENSMUSG00000002603(Tgfb1),ENSMUSG00000002944(Cd36),ENSMUSG00000003814(Calr),ENSMUSG00000004709(Cd244a),ENSMUSG00000006304(Arpc2),ENSMUSG00000006574(Slc4a1),ENSMUSG00000006958(Chrd),ENSMUSG00000007817(Zmiz1),ENSMUSG00000011256(Adam19),ENSMUSG00000015533(Itga2),ENSMUSG00000015619(Gata3),ENSMUSG00000016498(Pdcd1lg2),ENSM…	ENSMUSG00000000402(Egfl6),ENSMUSG00000000732(Icosl),ENSMUSG00000000869(Il4),ENSMUSG00000003882(Il7r),ENSMUSG00000003934(Efnb3),ENSMUSG00000005087(Cd44),ENSMUSG00000005824(Tnfsf14),ENSMUSG00000006538(Ihh),ENSMUSG00000008461(Fut1),ENSMUSG00000008999(Bmp7),ENSMUSG00000015396(Cd83),ENSMUSG00000016493(Cd46),ENSMUSG00000017344(Vtn),ENSMUSG00000018012(Rac3),ENSMUSG00000018924(Alox15),ENSMUSG00000019982(…
BP	GO:1902533	positive regulation of intracellular signal transduction	168	162	330	1014	2.2e-11	1.06362e-09	ENSMUSG00000000817(Fasl),ENSMUSG00000001020(S100a4),ENSMUSG00000001642(Akr1b3),ENSMUSG00000002015(Bcap31),ENSMUSG00000002250(Ppard),ENSMUSG00000002603(Tgfb1),ENSMUSG00000002944(Cd36),ENSMUSG00000003814(Calr),ENSMUSG00000004207(Psap),ENSMUSG00000004371(Il11),ENSMUSG00000005045(Chd5),ENSMUSG00000005161(Prdx2),ENSMUSG00000005268(Prlr),ENSMUSG00000005672(Kit),ENSMUSG00000005891(Prl4a1),ENSMUSG0000000…	ENSMUSG00000000120(Ngfr),ENSMUSG00000000567(Sox9),ENSMUSG00000000869(Il4),ENSMUSG00000002985(Apoe),ENSMUSG00000003882(Il7r),ENSMUSG00000004035(Gstm7),ENSMUSG00000004085(Map3k20),ENSMUSG00000005087(Cd44),ENSMUSG00000005320(Fgfr4),ENSMUSG00000005824(Tnfsf14),ENSMUSG00000006575(Rundc3a),ENSMUSG00000006930(Hap1),ENSMUSG00000015950(Ncf1),ENSMUSG00000015957(Wnt11),ENSMUSG00000017386(Traf4),ENSMUSG00000…
BP	GO:1902531	regulation of intracellular signal transduction	259	242	501	1646	2.3e-11	1.10868e-09	ENSMUSG00000000817(Fasl),ENSMUSG00000001020(S100a4),ENSMUSG00000001098(Kctd10),ENSMUSG00000001507(Itga3),ENSMUSG00000001517(Foxm1),ENSMUSG00000001642(Akr1b3),ENSMUSG00000001995(Sipa1l2),ENSMUSG00000002015(Bcap31),ENSMUSG00000002250(Ppard),ENSMUSG00000002603(Tgfb1),ENSMUSG00000002944(Cd36),ENSMUSG00000003032(Klf4),ENSMUSG00000003814(Calr),ENSMUSG00000004207(Psap),ENSMUSG00000004371(Il11),ENSMUSG00…	ENSMUSG00000000120(Ngfr),ENSMUSG00000000567(Sox9),ENSMUSG00000000869(Il4),ENSMUSG00000001583(Tnk1),ENSMUSG00000001672(Marveld3),ENSMUSG00000002384(Bmp8b),ENSMUSG00000002985(Apoe),ENSMUSG00000003882(Il7r),ENSMUSG00000004035(Gstm7),ENSMUSG00000004085(Map3k20),ENSMUSG00000004558(Ndrg2),ENSMUSG00000005087(Cd44),ENSMUSG00000005320(Fgfr4),ENSMUSG00000005533(Igf1r),ENSMUSG00000005824(Tnfsf14),ENSMUSG000…
BP	GO:0043270	positive regulation of ion transport	48	79	127	315	2.6e-11	1.24961e-09	ENSMUSG00000005892(Trh),ENSMUSG00000010064(Slc38a3),ENSMUSG00000014077(Chp1),ENSMUSG00000017400(Stac2),ENSMUSG00000019970(Sgk1),ENSMUSG00000020793(Galr2),ENSMUSG00000021313(Ryr2),ENSMUSG00000021486(Prelid1),ENSMUSG00000021591(Glrx),ENSMUSG00000021730(Hcn1),ENSMUSG00000022602(Arc),ENSMUSG00000024065(Ehd3),ENSMUSG00000025496(Drd4),ENSMUSG00000025551(Fgf14),ENSMUSG00000025701(Alox5),ENSMUSG000000258…	ENSMUSG00000002985(Apoe),ENSMUSG00000003352(Cacnb3),ENSMUSG00000003411(Rab3b),ENSMUSG00000003484(Cyp4f18),ENSMUSG00000004035(Gstm7),ENSMUSG00000006930(Hap1),ENSMUSG00000007122(Casq1),ENSMUSG00000015968(Cacna1d),ENSMUSG00000017412(Cacnb4),ENSMUSG00000017817(Jph2),ENSMUSG00000019699(Akt3),ENSMUSG00000019787(Trdn),ENSMUSG00000020123(Avpr1a),ENSMUSG00000020155(Kcnmb1),ENSMUSG00000020264(Slc36a2),ENSM…
CC	GO:0042175	nuclear outer membrane-endoplasmic reticulum membrane network	191	125	316	962	2.8e-11	1.34178e-09	ENSMUSG00000000001(Gnai3),ENSMUSG00000001467(Cyp51),ENSMUSG00000002014(Ssr4),ENSMUSG00000002015(Bcap31),ENSMUSG00000003814(Calr),ENSMUSG00000005413(Hmox1),ENSMUSG00000009092(Derl3),ENSMUSG00000009905(Kdsr),ENSMUSG00000010025(Aldh3a2),ENSMUSG00000014867(Surf4),ENSMUSG00000015812(Gnrh1),ENSMUSG00000016194(Hsd11b1),ENSMUSG00000018042(Cyb5r3),ENSMUSG00000018334(Ksr1),ENSMUSG00000018796(Acsl1),ENSMUSG…	ENSMUSG00000001249(Hpn),ENSMUSG00000003484(Cyp4f18),ENSMUSG00000006675(P4htm),ENSMUSG00000007122(Casq1),ENSMUSG00000007908(Hmgcll1),ENSMUSG00000012187(Mogat1),ENSMUSG00000017817(Jph2),ENSMUSG00000019737(Syne4),ENSMUSG00000019787(Trdn),ENSMUSG00000019933(Mrln),ENSMUSG00000020023(Tmcc3),ENSMUSG00000020333(Acsl6),ENSMUSG00000020524(Gria1),ENSMUSG00000020788(Atp2a3),ENSMUSG00000020890(Gucy2e),ENSMUSG…
BP	GO:0002682	regulation of immune system process	208	208	416	1331	2.9e-11	1.3816e-09	ENSMUSG00000000706(Btn1a1),ENSMUSG00000000791(Il12rb1),ENSMUSG00000002565(Scin),ENSMUSG00000002603(Tgfb1),ENSMUSG00000002944(Cd36),ENSMUSG00000002957(Ap2a2),ENSMUSG00000003814(Calr),ENSMUSG00000004709(Cd244a),ENSMUSG00000004791(Pgf),ENSMUSG00000005057(Sh2b2),ENSMUSG00000005161(Prdx2),ENSMUSG00000005413(Hmox1),ENSMUSG00000005672(Kit),ENSMUSG00000005696(Sh2d1a),ENSMUSG00000005763(Cd247),ENSMUSG0000…	ENSMUSG00000000567(Sox9),ENSMUSG00000000731(Aire),ENSMUSG00000000732(Icosl),ENSMUSG00000000782(Tcf7),ENSMUSG00000000869(Il4),ENSMUSG00000000903(Vpreb3),ENSMUSG00000000957(Mmp14),ENSMUSG00000002985(Apoe),ENSMUSG00000003352(Cacnb3),ENSMUSG00000003379(Cd79a),ENSMUSG00000003882(Il7r),ENSMUSG00000003934(Efnb3),ENSMUSG00000005824(Tnfsf14),ENSMUSG00000006538(Ihh),ENSMUSG00000006675(P4htm),ENSMUSG0000001…
CC	GO:0005789	endoplasmic reticulum membrane	188	121	309	937	2.9e-11	1.3816e-09	ENSMUSG00000000001(Gnai3),ENSMUSG00000001467(Cyp51),ENSMUSG00000002014(Ssr4),ENSMUSG00000002015(Bcap31),ENSMUSG00000003814(Calr),ENSMUSG00000005413(Hmox1),ENSMUSG00000009092(Derl3),ENSMUSG00000009905(Kdsr),ENSMUSG00000010025(Aldh3a2),ENSMUSG00000014867(Surf4),ENSMUSG00000015812(Gnrh1),ENSMUSG00000016194(Hsd11b1),ENSMUSG00000018042(Cyb5r3),ENSMUSG00000018334(Ksr1),ENSMUSG00000018796(Acsl1),ENSMUSG…	ENSMUSG00000001249(Hpn),ENSMUSG00000003484(Cyp4f18),ENSMUSG00000006675(P4htm),ENSMUSG00000007122(Casq1),ENSMUSG00000007908(Hmgcll1),ENSMUSG00000012187(Mogat1),ENSMUSG00000017817(Jph2),ENSMUSG00000019787(Trdn),ENSMUSG00000019933(Mrln),ENSMUSG00000020023(Tmcc3),ENSMUSG00000020333(Acsl6),ENSMUSG00000020524(Gria1),ENSMUSG00000020788(Atp2a3),ENSMUSG00000020890(Gucy2e),ENSMUSG00000021720(Rnf180),ENSMUS…
BP	GO:0050803	regulation of synapse structure or activity	26	67	93	210	3.1e-11	1.47259e-09	ENSMUSG00000018593(Sparc),ENSMUSG00000021782(Dlg5),ENSMUSG00000024868(Dkk1),ENSMUSG00000025020(Slit1),ENSMUSG00000025889(Snca),ENSMUSG00000027253(Lrp4),ENSMUSG00000028072(Ntrk1),ENSMUSG00000028273(Pdlim5),ENSMUSG00000029838(Ptn),ENSMUSG00000030098(Grip2),ENSMUSG00000031119(Gpc4),ENSMUSG00000031626(Sorbs2),ENSMUSG00000031654(Cbln1),ENSMUSG00000032012(Nectin1),ENSMUSG00000039952(Dag1),ENSMUSG000000…	ENSMUSG00000000416(Cttnbp2),ENSMUSG00000002104(Rapsn),ENSMUSG00000002985(Apoe),ENSMUSG00000005958(Ephb3),ENSMUSG00000013089(Etv5),ENSMUSG00000013236(Ptprs),ENSMUSG00000020902(Ntn1),ENSMUSG00000023885(Thbs2),ENSMUSG00000024304(Cdh2),ENSMUSG00000025582(Nptx1),ENSMUSG00000026235(Epha4),ENSMUSG00000026825(Dnm1),ENSMUSG00000027737(Slc7a11),ENSMUSG00000028289(Epha7),ENSMUSG00000028399(Ptprd),ENSMUSG000…
BP	GO:0009725	response to hormone	163	131	294	888	3.5e-11	1.65299e-09	ENSMUSG00000000708(Kat2b),ENSMUSG00000000792(Slc5a5),ENSMUSG00000001131(Timp1),ENSMUSG00000001507(Itga3),ENSMUSG00000001642(Akr1b3),ENSMUSG00000002250(Ppard),ENSMUSG00000002603(Tgfb1),ENSMUSG00000003814(Calr),ENSMUSG00000004791(Pgf),ENSMUSG00000005057(Sh2b2),ENSMUSG00000005268(Prlr),ENSMUSG00000005640(Insrr),ENSMUSG00000005672(Kit),ENSMUSG00000005892(Trh),ENSMUSG00000006589(Aprt),ENSMUSG000000078…	ENSMUSG00000000753(Serpinf1),ENSMUSG00000000957(Mmp14),ENSMUSG00000001249(Hpn),ENSMUSG00000001494(Sost),ENSMUSG00000005705(Agrp),ENSMUSG00000005718(Tfap4),ENSMUSG00000005836(Gata6),ENSMUSG00000006476(Nsmf),ENSMUSG00000008136(Fhl2),ENSMUSG00000008999(Bmp7),ENSMUSG00000015340(Cybb),ENSMUSG00000015568(Lpl),ENSMUSG00000015843(Rxrg),ENSMUSG00000017688(Hnf4g),ENSMUSG00000018566(Slc2a4),ENSMUSG000000196…
BP	GO:0045666	positive regulation of neuron differentiation	65	102	167	447	3.5e-11	1.65299e-09	ENSMUSG00000000305(Cdh4),ENSMUSG00000000708(Kat2b),ENSMUSG00000001507(Itga3),ENSMUSG00000004031(Brinp2),ENSMUSG00000004885(Crabp2),ENSMUSG00000004951(Hspb1),ENSMUSG00000017491(Rarb),ENSMUSG00000019970(Sgk1),ENSMUSG00000020857(Nme2),ENSMUSG00000021068(Nin),ENSMUSG00000021782(Dlg5),ENSMUSG00000022212(Cpne6),ENSMUSG00000022893(Adamts1),ENSMUSG00000023905(Tnfrsf12a),ENSMUSG00000024772(Ehd1),ENSMUSG00…	ENSMUSG00000000120(Ngfr),ENSMUSG00000000753(Serpinf1),ENSMUSG00000000861(Bcl11a),ENSMUSG00000002985(Apoe),ENSMUSG00000003948(Mmd),ENSMUSG00000006930(Hap1),ENSMUSG00000008999(Bmp7),ENSMUSG00000010086(Rnf112),ENSMUSG00000013089(Etv5),ENSMUSG00000019178(Styxl1),ENSMUSG00000020052(Ascl1),ENSMUSG00000020333(Acsl6),ENSMUSG00000020647(Ncoa1),ENSMUSG00000020668(Kif3c),ENSMUSG00000020902(Ntn1),ENSMUSG0000…
CC	GO:0099060	integral component of postsynaptic specialization membrane	10	44	54	99	3.6e-11	1.69532e-09	ENSMUSG00000000560(Gabra2),ENSMUSG00000020598(Nrcam),ENSMUSG00000022494(Shisa9),ENSMUSG00000024873(Cnih2),ENSMUSG00000025161(Slc16a3),ENSMUSG00000039579(Grin3a),ENSMUSG00000053930(Shisa6),ENSMUSG00000059003(Grin2a),ENSMUSG00000060780(Lrrtm1),ENSMUSG00000062209(Erbb4)	ENSMUSG00000003378(Grik5),ENSMUSG00000003934(Efnb3),ENSMUSG00000007653(Gabrb2),ENSMUSG00000013236(Ptprs),ENSMUSG00000020102(Slc16a7),ENSMUSG00000020431(Adcy1),ENSMUSG00000020524(Gria1),ENSMUSG00000022758(P2rx6),ENSMUSG00000024304(Cdh2),ENSMUSG00000025892(Gria4),ENSMUSG00000027107(Chrna1),ENSMUSG00000028289(Epha7),ENSMUSG00000029211(Gabra4),ENSMUSG00000030223(Ptpro),ENSMUSG00000030302(Atp2b2),ENSM…
CC	GO:0030016	myofibril	42	57	99	228	3.7e-11	1.73741e-09	ENSMUSG00000000708(Kat2b),ENSMUSG00000004951(Hspb1),ENSMUSG00000006457(Actn3),ENSMUSG00000006574(Slc4a1),ENSMUSG00000020315(Sptbn1),ENSMUSG00000021313(Ryr2),ENSMUSG00000024471(Myot),ENSMUSG00000024803(Ankrd1),ENSMUSG00000025172(Ankrd2),ENSMUSG00000026208(Des),ENSMUSG00000026246(Alppl2),ENSMUSG00000026313(Hdac4),ENSMUSG00000026418(Tnni1),ENSMUSG00000026817(Ak1),ENSMUSG00000028116(Myoz2),ENSMUSG000…	ENSMUSG00000001333(Sync),ENSMUSG00000005628(Tmod4),ENSMUSG00000007122(Casq1),ENSMUSG00000007877(Tcap),ENSMUSG00000008136(Fhl2),ENSMUSG00000015968(Cacna1d),ENSMUSG00000017817(Jph2),ENSMUSG00000019907(Ppp1r12a),ENSMUSG00000020388(Pdlim4),ENSMUSG00000020911(Krt19),ENSMUSG00000021456(Fbp2),ENSMUSG00000021798(Ldb3),ENSMUSG00000021870(Slmap),ENSMUSG00000022358(Fbxo32),ENSMUSG00000024049(Myom1),ENSMUSG0…
BP	GO:0050900	leukocyte migration	66	68	134	339	3.8e-11	1.77925e-09	ENSMUSG00000002603(Tgfb1),ENSMUSG00000003814(Calr),ENSMUSG00000004791(Pgf),ENSMUSG00000005672(Kit),ENSMUSG00000015533(Itga2),ENSMUSG00000015619(Gata3),ENSMUSG00000015766(Eps8),ENSMUSG00000016024(Lbp),ENSMUSG00000017697(Ada),ENSMUSG00000019278(Dpep1),ENSMUSG00000020689(Itgb3),ENSMUSG00000020717(Pecam1),ENSMUSG00000021194(Chga),ENSMUSG00000021508(Cxcl14),ENSMUSG00000021699(Pde4d),ENSMUSG00000021702…	ENSMUSG00000000731(Aire),ENSMUSG00000000869(Il4),ENSMUSG00000000889(Dbh),ENSMUSG00000000957(Mmp14),ENSMUSG00000001741(Il16),ENSMUSG00000005824(Tnfsf14),ENSMUSG00000011008(Mcoln2),ENSMUSG00000018920(Cxcl16),ENSMUSG00000018927(Ccl6),ENSMUSG00000019326(Aoc3),ENSMUSG00000020676(Ccl11),ENSMUSG00000020919(Stat5b),ENSMUSG00000021367(Edn1),ENSMUSG00000021464(Ror2),ENSMUSG00000021678(F2rl1),ENSMUSG0000002…
BP	GO:1903037	regulation of leukocyte cell-cell adhesion	72	60	132	333	4.2e-11	1.96092e-09	ENSMUSG00000000706(Btn1a1),ENSMUSG00000000791(Il12rb1),ENSMUSG00000002603(Tgfb1),ENSMUSG00000003032(Klf4),ENSMUSG00000004709(Cd244a),ENSMUSG00000005161(Prdx2),ENSMUSG00000006574(Slc4a1),ENSMUSG00000007817(Zmiz1),ENSMUSG00000015619(Gata3),ENSMUSG00000015812(Gnrh1),ENSMUSG00000016498(Pdcd1lg2),ENSMUSG00000017697(Ada),ENSMUSG00000020399(Havcr2),ENSMUSG00000020484(Xbp1),ENSMUSG00000021318(Gli3),ENSMU…	ENSMUSG00000000732(Icosl),ENSMUSG00000000782(Tcf7),ENSMUSG00000000869(Il4),ENSMUSG00000003882(Il7r),ENSMUSG00000003934(Efnb3),ENSMUSG00000005087(Cd44),ENSMUSG00000005824(Tnfsf14),ENSMUSG00000006538(Ihh),ENSMUSG00000015396(Cd83),ENSMUSG00000016493(Cd46),ENSMUSG00000019982(Myb),ENSMUSG00000020919(Stat5b),ENSMUSG00000021835(Bmp4),ENSMUSG00000023274(Cd4),ENSMUSG00000024334(H2-Oa),ENSMUSG00000024340(B…
BP	GO:0042327	positive regulation of phosphorylation	157	188	345	1074	4.4e-11	2.04844e-09	ENSMUSG00000000555(Itga5),ENSMUSG00000002603(Tgfb1),ENSMUSG00000002944(Cd36),ENSMUSG00000004207(Psap),ENSMUSG00000004371(Il11),ENSMUSG00000004791(Pgf),ENSMUSG00000005161(Prdx2),ENSMUSG00000005268(Prlr),ENSMUSG00000005640(Insrr),ENSMUSG00000005672(Kit),ENSMUSG00000013483(Card14),ENSMUSG00000015312(Gadd45b),ENSMUSG00000017446(C1qtnf1),ENSMUSG00000017950(Hnf4a),ENSMUSG00000018334(Ksr1),ENSMUSG000000…	ENSMUSG00000000120(Ngfr),ENSMUSG00000000142(Axin2),ENSMUSG00000000184(Ccnd2),ENSMUSG00000000567(Sox9),ENSMUSG00000000869(Il4),ENSMUSG00000000881(Dlg3),ENSMUSG00000002384(Bmp8b),ENSMUSG00000002985(Apoe),ENSMUSG00000003948(Mmd),ENSMUSG00000004085(Map3k20),ENSMUSG00000005087(Cd44),ENSMUSG00000005320(Fgfr4),ENSMUSG00000005958(Ephb3),ENSMUSG00000008999(Bmp7),ENSMUSG00000013921(Clip3),ENSMUSG0000001595…
BP	GO:0051146	striated muscle cell differentiation	54	66	120	295	4.6e-11	2.13547e-09	ENSMUSG00000002603(Tgfb1),ENSMUSG00000003814(Calr),ENSMUSG00000005148(Klf5),ENSMUSG00000006457(Actn3),ENSMUSG00000015745(Plekho1),ENSMUSG00000017491(Rarb),ENSMUSG00000019848(Popdc3),ENSMUSG00000020170(Frs2),ENSMUSG00000022371(Col14a1),ENSMUSG00000022996(Wnt10b),ENSMUSG00000022997(Wnt1),ENSMUSG00000024011(Pi16),ENSMUSG00000024042(Sik1),ENSMUSG00000024529(Lox),ENSMUSG00000024772(Ehd1),ENSMUSG000000…	ENSMUSG00000000869(Il4),ENSMUSG00000000957(Mmp14),ENSMUSG00000005628(Tmod4),ENSMUSG00000005824(Tnfsf14),ENSMUSG00000005836(Gata6),ENSMUSG00000007122(Casq1),ENSMUSG00000007877(Tcap),ENSMUSG00000008136(Fhl2),ENSMUSG00000008855(Hdac5),ENSMUSG00000017412(Cacnb4),ENSMUSG00000018830(Myh11),ENSMUSG00000019789(Hey2),ENSMUSG00000020123(Avpr1a),ENSMUSG00000020911(Krt19),ENSMUSG00000021367(Edn1),ENSMUSG0000…
CC	GO:0098827	endoplasmic reticulum subcompartment	188	122	310	945	5.2e-11	2.40717e-09	ENSMUSG00000000001(Gnai3),ENSMUSG00000001467(Cyp51),ENSMUSG00000002014(Ssr4),ENSMUSG00000002015(Bcap31),ENSMUSG00000003814(Calr),ENSMUSG00000005413(Hmox1),ENSMUSG00000009092(Derl3),ENSMUSG00000009905(Kdsr),ENSMUSG00000010025(Aldh3a2),ENSMUSG00000014867(Surf4),ENSMUSG00000015812(Gnrh1),ENSMUSG00000016194(Hsd11b1),ENSMUSG00000018042(Cyb5r3),ENSMUSG00000018334(Ksr1),ENSMUSG00000018796(Acsl1),ENSMUSG…	ENSMUSG00000001249(Hpn),ENSMUSG00000003484(Cyp4f18),ENSMUSG00000006675(P4htm),ENSMUSG00000007122(Casq1),ENSMUSG00000007908(Hmgcll1),ENSMUSG00000012187(Mogat1),ENSMUSG00000017817(Jph2),ENSMUSG00000019787(Trdn),ENSMUSG00000019933(Mrln),ENSMUSG00000020023(Tmcc3),ENSMUSG00000020333(Acsl6),ENSMUSG00000020524(Gria1),ENSMUSG00000020788(Atp2a3),ENSMUSG00000020890(Gucy2e),ENSMUSG00000021720(Rnf180),ENSMUS…
BP	GO:0007416	synapse assembly	22	61	83	182	5.7e-11	2.63118e-09	ENSMUSG00000000560(Gabra2),ENSMUSG00000021782(Dlg5),ENSMUSG00000024868(Dkk1),ENSMUSG00000025020(Slit1),ENSMUSG00000025889(Snca),ENSMUSG00000027253(Lrp4),ENSMUSG00000028072(Ntrk1),ENSMUSG00000028273(Pdlim5),ENSMUSG00000030000(Add2),ENSMUSG00000031119(Gpc4),ENSMUSG00000031217(Efnb1),ENSMUSG00000031654(Cbln1),ENSMUSG00000032012(Nectin1),ENSMUSG00000035566(Pcdh17),ENSMUSG00000042700(Sipa1l1),ENSMUSG0…	ENSMUSG00000000303(Cdh1),ENSMUSG00000005958(Ephb3),ENSMUSG00000007653(Gabrb2),ENSMUSG00000013236(Ptprs),ENSMUSG00000020902(Ntn1),ENSMUSG00000023885(Thbs2),ENSMUSG00000024304(Cdh2),ENSMUSG00000025582(Nptx1),ENSMUSG00000028289(Epha7),ENSMUSG00000028399(Ptprd),ENSMUSG00000028782(Adgrb2),ENSMUSG00000030093(Wnt7a),ENSMUSG00000031253(Srpx2),ENSMUSG00000031302(Nlgn3),ENSMUSG00000031517(Gpm6a),ENSMUSG000…
BP	GO:2000027	regulation of organ morphogenesis	36	48	84	185	5.8e-11	2.6698e-09	ENSMUSG00000002603(Tgfb1),ENSMUSG00000006800(Sulf2),ENSMUSG00000015619(Gata3),ENSMUSG00000016918(Sulf1),ENSMUSG00000020170(Frs2),ENSMUSG00000020484(Xbp1),ENSMUSG00000023473(Celsr3),ENSMUSG00000024014(Pim1),ENSMUSG00000024406(Pou5f1),ENSMUSG00000024868(Dkk1),ENSMUSG00000026167(Wnt10a),ENSMUSG00000027358(Bmp2),ENSMUSG00000028496(Mllt3),ENSMUSG00000029231(Pdgfra),ENSMUSG00000029838(Ptn),ENSMUSG00000…	ENSMUSG00000000120(Ngfr),ENSMUSG00000000567(Sox9),ENSMUSG00000001249(Hpn),ENSMUSG00000001656(Hoxc11),ENSMUSG00000007989(Fzd3),ENSMUSG00000008575(Nfib),ENSMUSG00000008999(Bmp7),ENSMUSG00000010797(Wnt2),ENSMUSG00000013089(Etv5),ENSMUSG00000015957(Wnt11),ENSMUSG00000020019(Ntn4),ENSMUSG00000021367(Edn1),ENSMUSG00000021388(Aspn),ENSMUSG00000021464(Ror2),ENSMUSG00000021779(Thrb),ENSMUSG00000021835(Bmp…
BP	GO:0071804	cellular potassium ion transport	31	60	91	206	5.9e-11	2.70061e-09	ENSMUSG00000018470(Kcnab3),ENSMUSG00000020793(Galr2),ENSMUSG00000021730(Hcn1),ENSMUSG00000025351(Cd63),ENSMUSG00000026062(Slc9a2),ENSMUSG00000027273(Snap25),ENSMUSG00000028420(Tmem38b),ENSMUSG00000028854(Slc9a1),ENSMUSG00000028931(Kcnab2),ENSMUSG00000032338(Hcn4),ENSMUSG00000032412(Atp1b3),ENSMUSG00000033854(Kcnk10),ENSMUSG00000035112(Wnk4),ENSMUSG00000037578(Pkd2l1),ENSMUSG00000037624(Kcnk2),ENS…	ENSMUSG00000000794(Kcnn3),ENSMUSG00000001249(Hpn),ENSMUSG00000002908(Kcnn1),ENSMUSG00000004988(Fxyd4),ENSMUSG00000005360(Slc1a3),ENSMUSG00000007107(Atp1a4),ENSMUSG00000009246(Trpm5),ENSMUSG00000015968(Cacna1d),ENSMUSG00000020155(Kcnmb1),ENSMUSG00000023387(Kcnk16),ENSMUSG00000024597(Slc12a2),ENSMUSG00000024907(Gal),ENSMUSG00000025221(Kcnip2),ENSMUSG00000026527(Rgs7),ENSMUSG00000026961(Lrrc26),ENSM…
BP	GO:0071805	potassium ion transmembrane transport	31	60	91	206	5.9e-11	2.70061e-09	ENSMUSG00000018470(Kcnab3),ENSMUSG00000020793(Galr2),ENSMUSG00000021730(Hcn1),ENSMUSG00000025351(Cd63),ENSMUSG00000026062(Slc9a2),ENSMUSG00000027273(Snap25),ENSMUSG00000028420(Tmem38b),ENSMUSG00000028854(Slc9a1),ENSMUSG00000028931(Kcnab2),ENSMUSG00000032338(Hcn4),ENSMUSG00000032412(Atp1b3),ENSMUSG00000033854(Kcnk10),ENSMUSG00000035112(Wnk4),ENSMUSG00000037578(Pkd2l1),ENSMUSG00000037624(Kcnk2),ENS…	ENSMUSG00000000794(Kcnn3),ENSMUSG00000001249(Hpn),ENSMUSG00000002908(Kcnn1),ENSMUSG00000004988(Fxyd4),ENSMUSG00000005360(Slc1a3),ENSMUSG00000007107(Atp1a4),ENSMUSG00000009246(Trpm5),ENSMUSG00000015968(Cacna1d),ENSMUSG00000020155(Kcnmb1),ENSMUSG00000023387(Kcnk16),ENSMUSG00000024597(Slc12a2),ENSMUSG00000024907(Gal),ENSMUSG00000025221(Kcnip2),ENSMUSG00000026527(Rgs7),ENSMUSG00000026961(Lrrc26),ENSM…
CC	GO:0042383	sarcolemma	23	54	77	164	6e-11	2.73872e-09	ENSMUSG00000000805(Car4),ENSMUSG00000002944(Cd36),ENSMUSG00000017400(Stac2),ENSMUSG00000019848(Popdc3),ENSMUSG00000020722(Cacng1),ENSMUSG00000021313(Ryr2),ENSMUSG00000024302(Dtna),ENSMUSG00000024471(Myot),ENSMUSG00000025701(Alox5),ENSMUSG00000026208(Des),ENSMUSG00000027488(Snta1),ENSMUSG00000028645(Slc2a1),ENSMUSG00000028854(Slc9a1),ENSMUSG00000028978(Nos3),ENSMUSG00000031375(Bgn),ENSMUSG00000032…	ENSMUSG00000000320(Alox12),ENSMUSG00000001119(Col6a1),ENSMUSG00000001333(Sync),ENSMUSG00000001508(Sgca),ENSMUSG00000003352(Cacnb3),ENSMUSG00000004631(Sgce),ENSMUSG00000007122(Casq1),ENSMUSG00000015968(Cacna1d),ENSMUSG00000018340(Anxa6),ENSMUSG00000018566(Slc2a4),ENSMUSG00000020241(Col6a2),ENSMUSG00000020672(Sntg2),ENSMUSG00000020882(Cacnb1),ENSMUSG00000020911(Krt19),ENSMUSG00000021870(Slmap),ENSM…
BP	GO:0060078	regulation of postsynaptic membrane potential	20	53	73	153	6.1e-11	2.7766e-09	ENSMUSG00000000560(Gabra2),ENSMUSG00000001260(Gabrg1),ENSMUSG00000003200(Sh3gl1),ENSMUSG00000022790(Igsf11),ENSMUSG00000023942(Slc29a1),ENSMUSG00000025496(Drd4),ENSMUSG00000025889(Snca),ENSMUSG00000030098(Grip2),ENSMUSG00000031654(Cbln1),ENSMUSG00000031778(Cx3cl1),ENSMUSG00000039579(Grin3a),ENSMUSG00000042429(Adora1),ENSMUSG00000047976(Kcna1),ENSMUSG00000048482(Bdnf),ENSMUSG00000056073(Grik2),ENS…	ENSMUSG00000000120(Ngfr),ENSMUSG00000001985(Grik3),ENSMUSG00000002032(Tmem25),ENSMUSG00000003352(Cacnb3),ENSMUSG00000003378(Grik5),ENSMUSG00000007653(Gabrb2),ENSMUSG00000020524(Gria1),ENSMUSG00000020787(P2rx1),ENSMUSG00000021719(Rgs7bp),ENSMUSG00000022619(Mapk8ip2),ENSMUSG00000022758(P2rx6),ENSMUSG00000023826(Prkn),ENSMUSG00000024256(Adcyap1),ENSMUSG00000025892(Gria4),ENSMUSG00000026527(Rgs7),ENS…
BP	GO:0042692	muscle cell differentiation	73	85	158	420	6.4e-11	2.90507e-09	ENSMUSG00000001627(Ifrd1),ENSMUSG00000002250(Ppard),ENSMUSG00000002603(Tgfb1),ENSMUSG00000003814(Calr),ENSMUSG00000005148(Klf5),ENSMUSG00000005672(Kit),ENSMUSG00000006050(Sra1),ENSMUSG00000006457(Actn3),ENSMUSG00000015745(Plekho1),ENSMUSG00000017491(Rarb),ENSMUSG00000019848(Popdc3),ENSMUSG00000020170(Frs2),ENSMUSG00000020184(Mdm2),ENSMUSG00000020427(Igfbp3),ENSMUSG00000021508(Cxcl14),ENSMUSG00000…	ENSMUSG00000000567(Sox9),ENSMUSG00000000869(Il4),ENSMUSG00000000957(Mmp14),ENSMUSG00000004939(Nmrk2),ENSMUSG00000005628(Tmod4),ENSMUSG00000005824(Tnfsf14),ENSMUSG00000005836(Gata6),ENSMUSG00000007122(Casq1),ENSMUSG00000007877(Tcap),ENSMUSG00000008136(Fhl2),ENSMUSG00000008855(Hdac5),ENSMUSG00000017412(Cacnb4),ENSMUSG00000018830(Myh11),ENSMUSG00000019789(Hey2),ENSMUSG00000020123(Avpr1a),ENSMUSG0000…
BP	GO:0045765	regulation of angiogenesis	76	47	123	306	6.6e-11	2.98755e-09	ENSMUSG00000000555(Itga5),ENSMUSG00000000628(Hk2),ENSMUSG00000000817(Fasl),ENSMUSG00000002944(Cd36),ENSMUSG00000003032(Klf4),ENSMUSG00000004791(Pgf),ENSMUSG00000004951(Hspb1),ENSMUSG00000005413(Hmox1),ENSMUSG00000015468(Notch4),ENSMUSG00000016918(Sulf1),ENSMUSG00000018593(Sparc),ENSMUSG00000019579(Mydgf),ENSMUSG00000020484(Xbp1),ENSMUSG00000020580(Rock2),ENSMUSG00000020689(Itgb3),ENSMUSG000000212…	ENSMUSG00000000120(Ngfr),ENSMUSG00000000753(Serpinf1),ENSMUSG00000005836(Gata6),ENSMUSG00000008461(Fut1),ENSMUSG00000008855(Hdac5),ENSMUSG00000015340(Cybb),ENSMUSG00000016128(Stard13),ENSMUSG00000018983(E2f2),ENSMUSG00000019699(Akt3),ENSMUSG00000019929(Dcn),ENSMUSG00000020676(Ccl11),ENSMUSG00000022225(Cma1),ENSMUSG00000022425(Enpp2),ENSMUSG00000022505(Emp2),ENSMUSG00000023031(Cela1),ENSMUSG000000…
BP	GO:0023061	signal release	72	108	180	494	6.7e-11	3.02444e-09	ENSMUSG00000002250(Ppard),ENSMUSG00000004113(Cacna1b),ENSMUSG00000004371(Il11),ENSMUSG00000005892(Trh),ENSMUSG00000007659(Bcl2l1),ENSMUSG00000012705(Retn),ENSMUSG00000015619(Gata3),ENSMUSG00000017446(C1qtnf1),ENSMUSG00000017716(Birc5),ENSMUSG00000017950(Hnf4a),ENSMUSG00000018500(Adora2b),ENSMUSG00000020484(Xbp1),ENSMUSG00000021071(Trim9),ENSMUSG00000021194(Chga),ENSMUSG00000021591(Glrx),ENSMUSG00…	ENSMUSG00000003378(Grik5),ENSMUSG00000003872(Lin7b),ENSMUSG00000004347(Pde1c),ENSMUSG00000007682(Dio2),ENSMUSG00000009394(Syn2),ENSMUSG00000014453(Blk),ENSMUSG00000015968(Cacna1d),ENSMUSG00000017412(Cacnb4),ENSMUSG00000017978(Cadps2),ENSMUSG00000018238(Gdf9),ENSMUSG00000019906(Lin7a),ENSMUSG00000020431(Adcy1),ENSMUSG00000020684(Rasl10b),ENSMUSG00000020787(P2rx1),ENSMUSG00000020847(Rph3al),ENSMUSG…
CC	GO:0030017	sarcomere	36	55	91	206	7.3e-11	3.28621e-09	ENSMUSG00000000708(Kat2b),ENSMUSG00000004951(Hspb1),ENSMUSG00000006457(Actn3),ENSMUSG00000006574(Slc4a1),ENSMUSG00000020315(Sptbn1),ENSMUSG00000021313(Ryr2),ENSMUSG00000024471(Myot),ENSMUSG00000024803(Ankrd1),ENSMUSG00000025172(Ankrd2),ENSMUSG00000026208(Des),ENSMUSG00000026313(Hdac4),ENSMUSG00000026418(Tnni1),ENSMUSG00000026817(Ak1),ENSMUSG00000028116(Myoz2),ENSMUSG00000028273(Pdlim5),ENSMUSG000…	ENSMUSG00000001333(Sync),ENSMUSG00000005628(Tmod4),ENSMUSG00000007122(Casq1),ENSMUSG00000007877(Tcap),ENSMUSG00000008136(Fhl2),ENSMUSG00000015968(Cacna1d),ENSMUSG00000017817(Jph2),ENSMUSG00000019907(Ppp1r12a),ENSMUSG00000020388(Pdlim4),ENSMUSG00000020911(Krt19),ENSMUSG00000021456(Fbp2),ENSMUSG00000021798(Ldb3),ENSMUSG00000021870(Slmap),ENSMUSG00000022358(Fbxo32),ENSMUSG00000024049(Myom1),ENSMUSG0…
MF	GO:0008201	heparin binding	32	39	71	147	7.5e-11	3.36696e-09	ENSMUSG00000006958(Chrd),ENSMUSG00000018623(Mmp7),ENSMUSG00000019997(Ccn2),ENSMUSG00000020609(Apob),ENSMUSG00000021702(Thbs4),ENSMUSG00000022816(Fstl1),ENSMUSG00000022893(Adamts1),ENSMUSG00000022894(Adamts5),ENSMUSG00000025020(Slit1),ENSMUSG00000026580(Selp),ENSMUSG00000027204(Fbn1),ENSMUSG00000027386(Fbln7),ENSMUSG00000027750(Postn),ENSMUSG00000027966(Col11a1),ENSMUSG00000028195(Ccn1),ENSMUSG000…	ENSMUSG00000001494(Sost),ENSMUSG00000002985(Apoe),ENSMUSG00000005320(Fgfr4),ENSMUSG00000008999(Bmp7),ENSMUSG00000009350(Mpo),ENSMUSG00000013236(Ptprs),ENSMUSG00000015568(Lpl),ENSMUSG00000017344(Vtn),ENSMUSG00000019880(Rspo3),ENSMUSG00000021466(Ptch1),ENSMUSG00000021835(Bmp4),ENSMUSG00000022523(Fgf12),ENSMUSG00000022665(Ccdc80),ENSMUSG00000023885(Thbs2),ENSMUSG00000025784(Clec3b),ENSMUSG0000002596…
BP	GO:0042445	hormone metabolic process	52	36	88	198	8.2e-11	3.6611e-09	ENSMUSG00000000792(Slc5a5),ENSMUSG00000001642(Akr1b3),ENSMUSG00000004885(Crabp2),ENSMUSG00000005220(Corin),ENSMUSG00000015134(Aldh1a3),ENSMUSG00000015619(Gata3),ENSMUSG00000019301(Hsd17b1),ENSMUSG00000020097(Sgpl1),ENSMUSG00000021214(Akr1c18),ENSMUSG00000021259(Cyp46a1),ENSMUSG00000021477(Ctsl),ENSMUSG00000021587(Pcsk1),ENSMUSG00000021594(Srd5a1),ENSMUSG00000024087(Cyp1b1),ENSMUSG00000024713(Pcsk…	ENSMUSG00000001249(Hpn),ENSMUSG00000007682(Dio2),ENSMUSG00000019762(Iyd),ENSMUSG00000020131(Pcsk4),ENSMUSG00000020673(Tpo),ENSMUSG00000020919(Stat5b),ENSMUSG00000021211(Akr1c12),ENSMUSG00000021213(Akr1c13),ENSMUSG00000021684(Pde8b),ENSMUSG00000024112(Cacna1h),ENSMUSG00000024907(Gal),ENSMUSG00000024985(Tcf7l2),ENSMUSG00000025350(Rdh5),ENSMUSG00000026976(Pax8),ENSMUSG00000029134(Plb1),ENSMUSG000000…
CC	GO:0031984	organelle subcompartment	267	196	463	1510	8.2e-11	3.6611e-09	ENSMUSG00000000001(Gnai3),ENSMUSG00000000420(Galnt1),ENSMUSG00000000805(Car4),ENSMUSG00000001467(Cyp51),ENSMUSG00000002014(Ssr4),ENSMUSG00000002015(Bcap31),ENSMUSG00000003814(Calr),ENSMUSG00000004383(Large1),ENSMUSG00000004849(Ap1s1),ENSMUSG00000005413(Hmox1),ENSMUSG00000006567(Atp7b),ENSMUSG00000006731(B4galnt1),ENSMUSG00000006800(Sulf2),ENSMUSG00000009092(Derl3),ENSMUSG00000009905(Kdsr),ENSMUSG…	ENSMUSG00000000303(Cdh1),ENSMUSG00000001249(Hpn),ENSMUSG00000001420(Tmem79),ENSMUSG00000002459(Rgs20),ENSMUSG00000003452(Bicd1),ENSMUSG00000003484(Cyp4f18),ENSMUSG00000006675(P4htm),ENSMUSG00000007122(Casq1),ENSMUSG00000007908(Hmgcll1),ENSMUSG00000008461(Fut1),ENSMUSG00000008658(Rbfox1),ENSMUSG00000012187(Mogat1),ENSMUSG00000013921(Clip3),ENSMUSG00000016179(Camk1g),ENSMUSG00000017817(Jph2),ENSMUS…
BP	GO:0043067	regulation of programmed cell death	245	229	474	1557	8.3e-11	3.69565e-09	ENSMUSG00000000001(Gnai3),ENSMUSG00000000555(Itga5),ENSMUSG00000000817(Fasl),ENSMUSG00000001131(Timp1),ENSMUSG00000001642(Akr1b3),ENSMUSG00000001773(Folh1),ENSMUSG00000002015(Bcap31),ENSMUSG00000002250(Ppard),ENSMUSG00000002565(Scin),ENSMUSG00000002603(Tgfb1),ENSMUSG00000003032(Klf4),ENSMUSG00000003541(Ier3),ENSMUSG00000004535(Tax1bp1),ENSMUSG00000004951(Hspb1),ENSMUSG00000005161(Prdx2),ENSMUSG00…	ENSMUSG00000000120(Ngfr),ENSMUSG00000000126(Wnt9a),ENSMUSG00000000184(Ccnd2),ENSMUSG00000000308(Ckmt1),ENSMUSG00000000320(Alox12),ENSMUSG00000000392(Fap),ENSMUSG00000000567(Sox9),ENSMUSG00000000782(Tcf7),ENSMUSG00000000869(Il4),ENSMUSG00000000889(Dbh),ENSMUSG00000001249(Hpn),ENSMUSG00000001435(Col18a1),ENSMUSG00000002104(Rapsn),ENSMUSG00000002289(Angptl4),ENSMUSG00000002985(Apoe),ENSMUSG000000033…
BP	GO:0008610	lipid biosynthetic process	125	76	201	567	8.6e-11	3.81882e-09	ENSMUSG00000001467(Cyp51),ENSMUSG00000002250(Ppard),ENSMUSG00000004885(Crabp2),ENSMUSG00000006517(Mvd),ENSMUSG00000006731(B4galnt1),ENSMUSG00000009905(Kdsr),ENSMUSG00000015134(Aldh1a3),ENSMUSG00000016194(Hsd11b1),ENSMUSG00000017929(B4galt5),ENSMUSG00000017950(Hnf4a),ENSMUSG00000018042(Cyb5r3),ENSMUSG00000018500(Adora2b),ENSMUSG00000018796(Acsl1),ENSMUSG00000019139(Isyna1),ENSMUSG00000019301(Hsd17…	ENSMUSG00000000320(Alox12),ENSMUSG00000002985(Apoe),ENSMUSG00000005320(Fgfr4),ENSMUSG00000012187(Mogat1),ENSMUSG00000015568(Lpl),ENSMUSG00000018907(Alox12e),ENSMUSG00000018924(Alox15),ENSMUSG00000020123(Avpr1a),ENSMUSG00000020333(Acsl6),ENSMUSG00000020447(Npc1l1),ENSMUSG00000020787(P2rx1),ENSMUSG00000020889(Nr1d1),ENSMUSG00000020891(Alox8),ENSMUSG00000021367(Edn1),ENSMUSG00000021684(Pde8b),ENSMUS…
BP	GO:0031214	biomineral tissue development	43	30	73	154	8.9e-11	3.94133e-09	ENSMUSG00000002603(Tgfb1),ENSMUSG00000005968(Tuft1),ENSMUSG00000006457(Actn3),ENSMUSG00000006948(Klk4),ENSMUSG00000020077(Srgn),ENSMUSG00000020846(Rflnb),ENSMUSG00000022868(Ahsg),ENSMUSG00000022996(Wnt10b),ENSMUSG00000024247(Pkdcc),ENSMUSG00000024529(Lox),ENSMUSG00000025701(Alox5),ENSMUSG00000025854(Fam20c),ENSMUSG00000027358(Bmp2),ENSMUSG00000027397(Slc20a1),ENSMUSG00000027788(Otol1),ENSMUSG0000…	ENSMUSG00000000142(Axin2),ENSMUSG00000000567(Sox9),ENSMUSG00000008999(Bmp7),ENSMUSG00000015957(Wnt11),ENSMUSG00000018924(Alox15),ENSMUSG00000019789(Hey2),ENSMUSG00000021388(Aspn),ENSMUSG00000021464(Ror2),ENSMUSG00000021469(Msx2),ENSMUSG00000021835(Bmp4),ENSMUSG00000022330(Osr2),ENSMUSG00000024985(Tcf7l2),ENSMUSG00000025784(Clec3b),ENSMUSG00000026674(Ddr2),ENSMUSG00000029468(P2rx7),ENSMUSG00000030…
BP	GO:0006836	neurotransmitter transport	30	69	99	232	9.6e-11	4.2284e-09	ENSMUSG00000000560(Gabra2),ENSMUSG00000004113(Cacna1b),ENSMUSG00000007659(Bcl2l1),ENSMUSG00000018500(Adora2b),ENSMUSG00000019558(Slc6a8),ENSMUSG00000020182(Ddc),ENSMUSG00000020484(Xbp1),ENSMUSG00000020689(Itgb3),ENSMUSG00000021071(Trim9),ENSMUSG00000021596(Mctp1),ENSMUSG00000023942(Slc29a1),ENSMUSG00000025496(Drd4),ENSMUSG00000025889(Snca),ENSMUSG00000027273(Snap25),ENSMUSG00000028747(Htr6),ENSMU…	ENSMUSG00000003378(Grik5),ENSMUSG00000003411(Rab3b),ENSMUSG00000003872(Lin7b),ENSMUSG00000005089(Slc1a2),ENSMUSG00000009394(Syn2),ENSMUSG00000015968(Cacna1d),ENSMUSG00000017412(Cacnb4),ENSMUSG00000017978(Cadps2),ENSMUSG00000019894(Slc6a15),ENSMUSG00000019906(Lin7a),ENSMUSG00000020431(Adcy1),ENSMUSG00000020787(P2rx1),ENSMUSG00000020838(Slc6a4),ENSMUSG00000020848(Doc2b),ENSMUSG00000020932(Gfap),ENS…
BP	GO:0006816	calcium ion transport	60	104	164	442	9.6e-11	4.2284e-09	ENSMUSG00000000817(Fasl),ENSMUSG00000002603(Tgfb1),ENSMUSG00000004113(Cacna1b),ENSMUSG00000012819(Cdh23),ENSMUSG00000017400(Stac2),ENSMUSG00000019997(Ccn2),ENSMUSG00000020689(Itgb3),ENSMUSG00000020722(Cacng1),ENSMUSG00000020907(Rcvrn),ENSMUSG00000020937(Plcd3),ENSMUSG00000021313(Ryr2),ENSMUSG00000021699(Pde4d),ENSMUSG00000021831(Ero1l),ENSMUSG00000024065(Ehd3),ENSMUSG00000024503(Spink1),ENSMUSG00…	ENSMUSG00000001741(Il16),ENSMUSG00000003352(Cacnb3),ENSMUSG00000004035(Gstm7),ENSMUSG00000004110(Cacna1e),ENSMUSG00000006930(Hap1),ENSMUSG00000007122(Casq1),ENSMUSG00000011008(Mcoln2),ENSMUSG00000015968(Cacna1d),ENSMUSG00000017412(Cacnb4),ENSMUSG00000017817(Jph2),ENSMUSG00000018340(Anxa6),ENSMUSG00000019787(Trdn),ENSMUSG00000019933(Mrln),ENSMUSG00000019982(Myb),ENSMUSG00000020577(Tspan13),ENSMUSG…
BP	GO:0050673	epithelial cell proliferation	82	75	157	419	1e-10	4.38097e-09	ENSMUSG00000002250(Ppard),ENSMUSG00000002603(Tgfb1),ENSMUSG00000004791(Pgf),ENSMUSG00000005413(Hmox1),ENSMUSG00000005672(Kit),ENSMUSG00000006205(Htra1),ENSMUSG00000006800(Sulf2),ENSMUSG00000015619(Gata3),ENSMUSG00000016918(Sulf1),ENSMUSG00000017716(Birc5),ENSMUSG00000018500(Adora2b),ENSMUSG00000018593(Sparc),ENSMUSG00000019579(Mydgf),ENSMUSG00000019874(Fabp7),ENSMUSG00000020170(Frs2),ENSMUSG00000…	ENSMUSG00000000120(Ngfr),ENSMUSG00000000184(Ccnd2),ENSMUSG00000000392(Fap),ENSMUSG00000000567(Sox9),ENSMUSG00000000753(Serpinf1),ENSMUSG00000000957(Mmp14),ENSMUSG00000001249(Hpn),ENSMUSG00000001672(Marveld3),ENSMUSG00000002985(Apoe),ENSMUSG00000004231(Pax2),ENSMUSG00000006538(Ihh),ENSMUSG00000008575(Nfib),ENSMUSG00000010797(Wnt2),ENSMUSG00000012350(Ehf),ENSMUSG00000019699(Akt3),ENSMUSG00000020140…
BP	GO:0060537	muscle tissue development	75	82	157	419	1e-10	4.38097e-09	ENSMUSG00000001627(Ifrd1),ENSMUSG00000002603(Tgfb1),ENSMUSG00000003814(Calr),ENSMUSG00000005148(Klf5),ENSMUSG00000006457(Actn3),ENSMUSG00000014030(Pax5),ENSMUSG00000017491(Rarb),ENSMUSG00000019848(Popdc3),ENSMUSG00000020170(Frs2),ENSMUSG00000021067(Sav1),ENSMUSG00000021250(Fos),ENSMUSG00000021313(Ryr2),ENSMUSG00000021670(Hmgcr),ENSMUSG00000022371(Col14a1),ENSMUSG00000022996(Wnt10b),ENSMUSG0000002…	ENSMUSG00000000567(Sox9),ENSMUSG00000002007(Srpk3),ENSMUSG00000005836(Gata6),ENSMUSG00000006538(Ihh),ENSMUSG00000007122(Casq1),ENSMUSG00000007877(Tcap),ENSMUSG00000008136(Fhl2),ENSMUSG00000008658(Rbfox1),ENSMUSG00000008999(Bmp7),ENSMUSG00000010797(Wnt2),ENSMUSG00000017817(Jph2),ENSMUSG00000017897(Eya2),ENSMUSG00000018830(Myh11),ENSMUSG00000019789(Hey2),ENSMUSG00000019929(Dcn),ENSMUSG00000021200(A…
BP	GO:0019722	calcium-mediated signaling	34	57	91	208	1.1e-10	4.78061e-09	ENSMUSG00000002015(Bcap31),ENSMUSG00000006457(Actn3),ENSMUSG00000014077(Chp1),ENSMUSG00000017697(Ada),ENSMUSG00000020225(Tmbim4),ENSMUSG00000021313(Ryr2),ENSMUSG00000021699(Pde4d),ENSMUSG00000022122(Ednrb),ENSMUSG00000025496(Drd4),ENSMUSG00000026117(Zap70),ENSMUSG00000026228(Htr2b),ENSMUSG00000026313(Hdac4),ENSMUSG00000026580(Selp),ENSMUSG00000027636(Sla2),ENSMUSG00000028116(Myoz2),ENSMUSG0000002…	ENSMUSG00000004035(Gstm7),ENSMUSG00000006930(Hap1),ENSMUSG00000007122(Casq1),ENSMUSG00000008136(Fhl2),ENSMUSG00000015968(Cacna1d),ENSMUSG00000017817(Jph2),ENSMUSG00000019787(Trdn),ENSMUSG00000020123(Avpr1a),ENSMUSG00000021057(Akap5),ENSMUSG00000021367(Edn1),ENSMUSG00000023274(Cd4),ENSMUSG00000023931(Efhb),ENSMUSG00000024430(Cabyr),ENSMUSG00000025068(Gsto1),ENSMUSG00000026180(Cxcr2),ENSMUSG0000002…
BP	GO:0050807	regulation of synapse organization	25	63	88	199	1.1e-10	4.78061e-09	ENSMUSG00000018593(Sparc),ENSMUSG00000021782(Dlg5),ENSMUSG00000024868(Dkk1),ENSMUSG00000025020(Slit1),ENSMUSG00000025889(Snca),ENSMUSG00000027253(Lrp4),ENSMUSG00000028072(Ntrk1),ENSMUSG00000028273(Pdlim5),ENSMUSG00000029838(Ptn),ENSMUSG00000030098(Grip2),ENSMUSG00000031119(Gpc4),ENSMUSG00000031626(Sorbs2),ENSMUSG00000031654(Cbln1),ENSMUSG00000032012(Nectin1),ENSMUSG00000039952(Dag1),ENSMUSG000000…	ENSMUSG00000000416(Cttnbp2),ENSMUSG00000002104(Rapsn),ENSMUSG00000002985(Apoe),ENSMUSG00000005958(Ephb3),ENSMUSG00000013089(Etv5),ENSMUSG00000013236(Ptprs),ENSMUSG00000020902(Ntn1),ENSMUSG00000023885(Thbs2),ENSMUSG00000024304(Cdh2),ENSMUSG00000025582(Nptx1),ENSMUSG00000026235(Epha4),ENSMUSG00000027737(Slc7a11),ENSMUSG00000028289(Epha7),ENSMUSG00000028399(Ptprd),ENSMUSG00000028782(Adgrb2),ENSMUSG0…
BP	GO:0000165	MAPK cascade	123	135	258	768	1.1e-10	4.78061e-09	ENSMUSG00000001517(Foxm1),ENSMUSG00000002603(Tgfb1),ENSMUSG00000002944(Cd36),ENSMUSG00000003032(Klf4),ENSMUSG00000004207(Psap),ENSMUSG00000004371(Il11),ENSMUSG00000005161(Prdx2),ENSMUSG00000005672(Kit),ENSMUSG00000015312(Gadd45b),ENSMUSG00000017446(C1qtnf1),ENSMUSG00000018334(Ksr1),ENSMUSG00000018648(Dusp14),ENSMUSG00000018821(Avpi1),ENSMUSG00000018932(Map2k3),ENSMUSG00000019579(Mydgf),ENSMUSG000…	ENSMUSG00000000120(Ngfr),ENSMUSG00000000567(Sox9),ENSMUSG00000001672(Marveld3),ENSMUSG00000002384(Bmp8b),ENSMUSG00000002985(Apoe),ENSMUSG00000004085(Map3k20),ENSMUSG00000004558(Ndrg2),ENSMUSG00000004864(Mapk13),ENSMUSG00000005087(Cd44),ENSMUSG00000005320(Fgfr4),ENSMUSG00000005533(Igf1r),ENSMUSG00000008999(Bmp7),ENSMUSG00000015950(Ncf1),ENSMUSG00000017386(Traf4),ENSMUSG00000018849(Wwc1),ENSMUSG000…
BP	GO:0048608	reproductive structure development	98	77	175	480	1.2e-10	5.17393e-09	ENSMUSG00000001510(Dlx3),ENSMUSG00000002250(Ppard),ENSMUSG00000004207(Psap),ENSMUSG00000005268(Prlr),ENSMUSG00000005672(Kit),ENSMUSG00000005883(Spo11),ENSMUSG00000006205(Htra1),ENSMUSG00000007659(Bcl2l1),ENSMUSG00000010760(Phlda2),ENSMUSG00000011256(Adam19),ENSMUSG00000012705(Retn),ENSMUSG00000015619(Gata3),ENSMUSG00000015812(Gnrh1),ENSMUSG00000016918(Sulf1),ENSMUSG00000017697(Ada),ENSMUSG0000001…	ENSMUSG00000000567(Sox9),ENSMUSG00000000730(Dnmt3l),ENSMUSG00000000753(Serpinf1),ENSMUSG00000000782(Tcf7),ENSMUSG00000000957(Mmp14),ENSMUSG00000002324(Rec8),ENSMUSG00000003282(Plag1),ENSMUSG00000005836(Gata6),ENSMUSG00000008999(Bmp7),ENSMUSG00000009248(Ascl2),ENSMUSG00000009628(Tex15),ENSMUSG00000010797(Wnt2),ENSMUSG00000014846(Tppp3),ENSMUSG00000018238(Gdf9),ENSMUSG00000019789(Hey2),ENSMUSG00000…
BP	GO:0061564	axon development	73	104	177	487	1.2e-10	5.17393e-09	ENSMUSG00000000305(Cdh4),ENSMUSG00000001227(Sema6b),ENSMUSG00000001627(Ifrd1),ENSMUSG00000003032(Klf4),ENSMUSG00000004151(Etv1),ENSMUSG00000004885(Crabp2),ENSMUSG00000015619(Gata3),ENSMUSG00000017929(B4galt5),ENSMUSG00000020099(Unc5b),ENSMUSG00000020340(Cyfip2),ENSMUSG00000020393(Kremen1),ENSMUSG00000020598(Nrcam),ENSMUSG00000021068(Nin),ENSMUSG00000021318(Gli3),ENSMUSG00000021728(Emb),ENSMUSG000…	ENSMUSG00000000120(Ngfr),ENSMUSG00000000627(Sema4f),ENSMUSG00000000861(Bcl11a),ENSMUSG00000002985(Apoe),ENSMUSG00000003934(Efnb3),ENSMUSG00000005958(Ephb3),ENSMUSG00000007989(Fzd3),ENSMUSG00000008575(Nfib),ENSMUSG00000008999(Bmp7),ENSMUSG00000011751(Sptbn4),ENSMUSG00000013236(Ptprs),ENSMUSG00000014704(Hoxa2),ENSMUSG00000015222(Map2),ENSMUSG00000020431(Adcy1),ENSMUSG00000020902(Ntn1),ENSMUSG000000…
CC	GO:0005604	basement membrane	22	33	55	104	1.2e-10	5.17393e-09	ENSMUSG00000001131(Timp1),ENSMUSG00000015647(Lama5),ENSMUSG00000018593(Sparc),ENSMUSG00000020044(Timp3),ENSMUSG00000021702(Thbs4),ENSMUSG00000021806(Nid2),ENSMUSG00000022893(Adamts1),ENSMUSG00000025510(Cd151),ENSMUSG00000026478(Lamc1),ENSMUSG00000027204(Fbn1),ENSMUSG00000028641(P3h1),ENSMUSG00000029368(Alb),ENSMUSG00000029838(Ptn),ENSMUSG00000031502(Col4a1),ENSMUSG00000032231(Anxa2),ENSMUSG000000…	ENSMUSG00000000402(Egfl6),ENSMUSG00000000753(Serpinf1),ENSMUSG00000001435(Col18a1),ENSMUSG00000015085(Entpd2),ENSMUSG00000017344(Vtn),ENSMUSG00000020019(Ntn4),ENSMUSG00000020758(Itgb4),ENSMUSG00000020902(Ntn1),ENSMUSG00000022665(Ccdc80),ENSMUSG00000023885(Thbs2),ENSMUSG00000025064(Col17a1),ENSMUSG00000025068(Gsto1),ENSMUSG00000025082(Vwa2),ENSMUSG00000025650(Col7a1),ENSMUSG00000026109(Tmeff2),ENS…
BP	GO:0050789	regulation of biological process	1378	1693	3071	12204	1.6e-10	6.8444e-09	ENSMUSG00000000001(Gnai3),ENSMUSG00000000028(Cdc45),ENSMUSG00000000305(Cdh4),ENSMUSG00000000555(Itga5),ENSMUSG00000000560(Gabra2),ENSMUSG00000000628(Hk2),ENSMUSG00000000706(Btn1a1),ENSMUSG00000000708(Kat2b),ENSMUSG00000000791(Il12rb1),ENSMUSG00000000817(Fasl),ENSMUSG00000000983(Wfdc18),ENSMUSG00000001020(S100a4),ENSMUSG00000001098(Kctd10),ENSMUSG00000001131(Timp1),ENSMUSG00000001156(Mxd1),ENSMUSG…	ENSMUSG00000000085(Scmh1),ENSMUSG00000000120(Ngfr),ENSMUSG00000000126(Wnt9a),ENSMUSG00000000142(Axin2),ENSMUSG00000000157(Itgb2l),ENSMUSG00000000184(Ccnd2),ENSMUSG00000000303(Cdh1),ENSMUSG00000000308(Ckmt1),ENSMUSG00000000320(Alox12),ENSMUSG00000000385(Tmprss2),ENSMUSG00000000392(Fap),ENSMUSG00000000402(Egfl6),ENSMUSG00000000416(Cttnbp2),ENSMUSG00000000562(Adora3),ENSMUSG00000000567(Sox9),ENSMUSG…
BP	GO:0007204	positive regulation of cytosolic calcium ion concentration	54	83	137	355	1.6e-10	6.8444e-09	ENSMUSG00000000817(Fasl),ENSMUSG00000002015(Bcap31),ENSMUSG00000002603(Tgfb1),ENSMUSG00000002944(Cd36),ENSMUSG00000004113(Cacna1b),ENSMUSG00000017446(C1qtnf1),ENSMUSG00000020689(Itgb3),ENSMUSG00000020793(Galr2),ENSMUSG00000020937(Plcd3),ENSMUSG00000021313(Ryr2),ENSMUSG00000021675(F2rl2),ENSMUSG00000021699(Pde4d),ENSMUSG00000021831(Ero1l),ENSMUSG00000022122(Ednrb),ENSMUSG00000022875(Kng1),ENSMUSG0…	ENSMUSG00000003352(Cacnb3),ENSMUSG00000004035(Gstm7),ENSMUSG00000006930(Hap1),ENSMUSG00000007122(Casq1),ENSMUSG00000011008(Mcoln2),ENSMUSG00000015968(Cacna1d),ENSMUSG00000017412(Cacnb4),ENSMUSG00000017817(Jph2),ENSMUSG00000019787(Trdn),ENSMUSG00000020123(Avpr1a),ENSMUSG00000020866(Cacna1g),ENSMUSG00000021057(Akap5),ENSMUSG00000021070(Bdkrb2),ENSMUSG00000021367(Edn1),ENSMUSG00000021678(F2rl1),ENSM…
BP	GO:0031667	response to nutrient levels	119	64	183	509	1.6e-10	6.8444e-09	ENSMUSG00000002250(Ppard),ENSMUSG00000002603(Tgfb1),ENSMUSG00000005413(Hmox1),ENSMUSG00000005891(Prl4a1),ENSMUSG00000006488(Prl7a1),ENSMUSG00000006490(Prl8a9),ENSMUSG00000009772(Nuak2),ENSMUSG00000010064(Slc38a3),ENSMUSG00000011148(Adssl1),ENSMUSG00000013629(Cad),ENSMUSG00000015533(Itga2),ENSMUSG00000017064(Prl5a1),ENSMUSG00000017311(Pyy),ENSMUSG00000017697(Ada),ENSMUSG00000017922(Prl3c1),ENSMUSG…	ENSMUSG00000001663(Gstt1),ENSMUSG00000002289(Angptl4),ENSMUSG00000002384(Bmp8b),ENSMUSG00000002985(Apoe),ENSMUSG00000003352(Cacnb3),ENSMUSG00000004231(Pax2),ENSMUSG00000008999(Bmp7),ENSMUSG00000009350(Mpo),ENSMUSG00000015340(Cybb),ENSMUSG00000015568(Lpl),ENSMUSG00000015957(Wnt11),ENSMUSG00000017978(Cadps2),ENSMUSG00000020052(Ascl1),ENSMUSG00000020647(Ncoa1),ENSMUSG00000020838(Slc6a4),ENSMUSG00000…
BP	GO:0060322	head development	113	149	262	785	1.7e-10	7.19681e-09	ENSMUSG00000000001(Gnai3),ENSMUSG00000001751(Naglu),ENSMUSG00000002603(Tgfb1),ENSMUSG00000004207(Psap),ENSMUSG00000005045(Chd5),ENSMUSG00000006958(Chrd),ENSMUSG00000007946(Phox2a),ENSMUSG00000008475(Arpc5),ENSMUSG00000010064(Slc38a3),ENSMUSG00000013415(Igf2bp1),ENSMUSG00000014030(Pax5),ENSMUSG00000015134(Aldh1a3),ENSMUSG00000017491(Rarb),ENSMUSG00000019874(Fabp7),ENSMUSG00000019979(Apaf1),ENSMUSG…	ENSMUSG00000000303(Cdh1),ENSMUSG00000000416(Cttnbp2),ENSMUSG00000000567(Sox9),ENSMUSG00000000957(Mmp14),ENSMUSG00000001270(Ckb),ENSMUSG00000001911(Nfix),ENSMUSG00000005089(Slc1a2),ENSMUSG00000005958(Ephb3),ENSMUSG00000006538(Ihh),ENSMUSG00000006930(Hap1),ENSMUSG00000007989(Fzd3),ENSMUSG00000008575(Nfib),ENSMUSG00000008999(Bmp7),ENSMUSG00000010797(Wnt2),ENSMUSG00000013236(Ptprs),ENSMUSG00000014602…
BP	GO:0008544	epidermis development	54	65	119	297	1.7e-10	7.19681e-09	ENSMUSG00000002250(Ppard),ENSMUSG00000003032(Klf4),ENSMUSG00000003271(Sult2b1),ENSMUSG00000004207(Psap),ENSMUSG00000005355(Casp14),ENSMUSG00000010025(Aldh3a2),ENSMUSG00000012819(Cdh23),ENSMUSG00000015647(Lama5),ENSMUSG00000020580(Rock2),ENSMUSG00000020656(Grhl1),ENSMUSG00000020857(Nme2),ENSMUSG00000021054(Sgpp1),ENSMUSG00000021067(Sav1),ENSMUSG00000021319(Sfrp4),ENSMUSG00000021477(Ctsl),ENSMUSG00…	ENSMUSG00000000120(Ngfr),ENSMUSG00000000567(Sox9),ENSMUSG00000001420(Tmem79),ENSMUSG00000007034(Slc44a4),ENSMUSG00000007989(Fzd3),ENSMUSG00000019789(Hey2),ENSMUSG00000020086(Macroh2a2),ENSMUSG00000020140(Lgr5),ENSMUSG00000020701(Tmem132e),ENSMUSG00000020891(Alox8),ENSMUSG00000021466(Ptch1),ENSMUSG00000021469(Msx2),ENSMUSG00000021835(Bmp4),ENSMUSG00000022286(Grhl2),ENSMUSG00000022297(Fzd6),ENSMUSG…
CC	GO:0099061	integral component of postsynaptic density membrane	8	32	40	66	1.7e-10	7.19681e-09	ENSMUSG00000020598(Nrcam),ENSMUSG00000022494(Shisa9),ENSMUSG00000024873(Cnih2),ENSMUSG00000025161(Slc16a3),ENSMUSG00000039579(Grin3a),ENSMUSG00000053930(Shisa6),ENSMUSG00000059003(Grin2a),ENSMUSG00000062209(Erbb4)	ENSMUSG00000003378(Grik5),ENSMUSG00000003934(Efnb3),ENSMUSG00000013236(Ptprs),ENSMUSG00000020102(Slc16a7),ENSMUSG00000020431(Adcy1),ENSMUSG00000020524(Gria1),ENSMUSG00000025892(Gria4),ENSMUSG00000028289(Epha7),ENSMUSG00000030223(Ptpro),ENSMUSG00000030302(Atp2b2),ENSMUSG00000032452(Clstn2),ENSMUSG00000032773(Chrm1),ENSMUSG00000033295(Ptprf),ENSMUSG00000036957(Lrfn3),ENSMUSG00000039953(Clstn1),ENSM…
CC	GO:0030018	Z disc	25	42	67	138	1.7e-10	7.19681e-09	ENSMUSG00000004951(Hspb1),ENSMUSG00000006457(Actn3),ENSMUSG00000006574(Slc4a1),ENSMUSG00000021313(Ryr2),ENSMUSG00000024471(Myot),ENSMUSG00000026208(Des),ENSMUSG00000026313(Hdac4),ENSMUSG00000028116(Myoz2),ENSMUSG00000028273(Pdlim5),ENSMUSG00000028645(Slc2a1),ENSMUSG00000030470(Csrp3),ENSMUSG00000030695(Aldoa),ENSMUSG00000030847(Bag3),ENSMUSG00000031626(Sorbs2),ENSMUSG00000032060(Cryab),ENSMUSG000…	ENSMUSG00000001333(Sync),ENSMUSG00000007122(Casq1),ENSMUSG00000007877(Tcap),ENSMUSG00000008136(Fhl2),ENSMUSG00000015968(Cacna1d),ENSMUSG00000017817(Jph2),ENSMUSG00000019907(Ppp1r12a),ENSMUSG00000020388(Pdlim4),ENSMUSG00000020911(Krt19),ENSMUSG00000021456(Fbp2),ENSMUSG00000021798(Ldb3),ENSMUSG00000021870(Slmap),ENSMUSG00000022358(Fbxo32),ENSMUSG00000024049(Myom1),ENSMUSG00000026463(Atp2b4),ENSMUSG…
BP	GO:0120035	regulation of plasma membrane bounded cell projection organization	104	148	252	750	1.8e-10	7.60047e-09	ENSMUSG00000000305(Cdh4),ENSMUSG00000000708(Kat2b),ENSMUSG00000001227(Sema6b),ENSMUSG00000001507(Itga3),ENSMUSG00000001627(Ifrd1),ENSMUSG00000003032(Klf4),ENSMUSG00000004885(Crabp2),ENSMUSG00000004951(Hspb1),ENSMUSG00000005148(Klf5),ENSMUSG00000005672(Kit),ENSMUSG00000006304(Arpc2),ENSMUSG00000015619(Gata3),ENSMUSG00000015766(Eps8),ENSMUSG00000017950(Hnf4a),ENSMUSG00000019970(Sgk1),ENSMUSG0000002…	ENSMUSG00000000120(Ngfr),ENSMUSG00000000627(Sema4f),ENSMUSG00000000753(Serpinf1),ENSMUSG00000000861(Bcl11a),ENSMUSG00000002985(Apoe),ENSMUSG00000003934(Efnb3),ENSMUSG00000005087(Cd44),ENSMUSG00000005958(Ephb3),ENSMUSG00000006476(Nsmf),ENSMUSG00000006586(Runx1t1),ENSMUSG00000006930(Hap1),ENSMUSG00000008999(Bmp7),ENSMUSG00000013236(Ptprs),ENSMUSG00000014602(Kif1a),ENSMUSG00000015222(Map2),ENSMUSG00…
BP	GO:0001508	action potential	16	49	65	133	1.9e-10	7.92038e-09	ENSMUSG00000002944(Cd36),ENSMUSG00000020598(Nrcam),ENSMUSG00000021313(Ryr2),ENSMUSG00000021730(Hcn1),ENSMUSG00000027488(Snta1),ENSMUSG00000028854(Slc9a1),ENSMUSG00000032338(Hcn4),ENSMUSG00000032511(Scn5a),ENSMUSG00000038764(Ptpn3),ENSMUSG00000039672(Kcne2),ENSMUSG00000039701(Usp53),ENSMUSG00000047976(Kcna1),ENSMUSG00000049281(Scn3b),ENSMUSG00000050627(Gpd1l),ENSMUSG00000056073(Grik2),ENSMUSG00000…	ENSMUSG00000003352(Cacnb3),ENSMUSG00000015968(Cacna1d),ENSMUSG00000017167(Cntnap1),ENSMUSG00000017412(Cacnb4),ENSMUSG00000020524(Gria1),ENSMUSG00000020787(P2rx1),ENSMUSG00000020866(Cacna1g),ENSMUSG00000021870(Slmap),ENSMUSG00000022523(Fgf12),ENSMUSG00000022865(Cxadr),ENSMUSG00000024112(Cacna1h),ENSMUSG00000027107(Chrna1),ENSMUSG00000027895(Kcnc4),ENSMUSG00000030247(Kcnj8),ENSMUSG00000030376(Slc8a…
BP	GO:0008202	steroid metabolic process	72	45	117	291	1.9e-10	7.92038e-09	ENSMUSG00000001467(Cyp51),ENSMUSG00000003271(Sult2b1),ENSMUSG00000005672(Kit),ENSMUSG00000006517(Mvd),ENSMUSG00000016194(Hsd11b1),ENSMUSG00000018042(Cyb5r3),ENSMUSG00000018500(Adora2b),ENSMUSG00000018861(Fdxr),ENSMUSG00000019301(Hsd17b1),ENSMUSG00000020097(Sgpl1),ENSMUSG00000020609(Apob),ENSMUSG00000021214(Akr1c18),ENSMUSG00000021242(Npc2),ENSMUSG00000021259(Cyp46a1),ENSMUSG00000021594(Srd5a1),EN…	ENSMUSG00000000869(Il4),ENSMUSG00000002985(Apoe),ENSMUSG00000005320(Fgfr4),ENSMUSG00000020405(Fabp6),ENSMUSG00000020447(Npc1l1),ENSMUSG00000020889(Nr1d1),ENSMUSG00000020919(Stat5b),ENSMUSG00000021211(Akr1c12),ENSMUSG00000021213(Akr1c13),ENSMUSG00000021684(Pde8b),ENSMUSG00000021779(Thrb),ENSMUSG00000023963(Cyp39a1),ENSMUSG00000024030(Abcg1),ENSMUSG00000024112(Cacna1h),ENSMUSG00000024907(Gal),ENSMU…
BP	GO:0042981	regulation of apoptotic process	240	226	466	1535	1.9e-10	7.92038e-09	ENSMUSG00000000001(Gnai3),ENSMUSG00000000555(Itga5),ENSMUSG00000000817(Fasl),ENSMUSG00000001131(Timp1),ENSMUSG00000001642(Akr1b3),ENSMUSG00000001773(Folh1),ENSMUSG00000002015(Bcap31),ENSMUSG00000002250(Ppard),ENSMUSG00000002565(Scin),ENSMUSG00000002603(Tgfb1),ENSMUSG00000003032(Klf4),ENSMUSG00000003541(Ier3),ENSMUSG00000004535(Tax1bp1),ENSMUSG00000004951(Hspb1),ENSMUSG00000005161(Prdx2),ENSMUSG00…	ENSMUSG00000000120(Ngfr),ENSMUSG00000000126(Wnt9a),ENSMUSG00000000184(Ccnd2),ENSMUSG00000000308(Ckmt1),ENSMUSG00000000320(Alox12),ENSMUSG00000000392(Fap),ENSMUSG00000000567(Sox9),ENSMUSG00000000782(Tcf7),ENSMUSG00000000869(Il4),ENSMUSG00000000889(Dbh),ENSMUSG00000001249(Hpn),ENSMUSG00000001435(Col18a1),ENSMUSG00000002104(Rapsn),ENSMUSG00000002289(Angptl4),ENSMUSG00000002985(Apoe),ENSMUSG000000033…
BP	GO:0042060	wound healing	91	63	154	412	1.9e-10	7.92038e-09	ENSMUSG00000000216(Scnn1g),ENSMUSG00000000555(Itga5),ENSMUSG00000001131(Timp1),ENSMUSG00000001627(Ifrd1),ENSMUSG00000002233(Rhoc),ENSMUSG00000002250(Ppard),ENSMUSG00000002603(Tgfb1),ENSMUSG00000002944(Cd36),ENSMUSG00000004383(Large1),ENSMUSG00000005148(Klf5),ENSMUSG00000005161(Prdx2),ENSMUSG00000005413(Hmox1),ENSMUSG00000006574(Slc4a1),ENSMUSG00000015533(Itga2),ENSMUSG00000017446(C1qtnf1),ENSMUSG…	ENSMUSG00000000320(Alox12),ENSMUSG00000001508(Sgca),ENSMUSG00000002985(Apoe),ENSMUSG00000005087(Cd44),ENSMUSG00000015085(Entpd2),ENSMUSG00000018340(Anxa6),ENSMUSG00000018924(Alox15),ENSMUSG00000019929(Dcn),ENSMUSG00000020787(P2rx1),ENSMUSG00000021469(Msx2),ENSMUSG00000021678(F2rl1),ENSMUSG00000022149(C9),ENSMUSG00000022297(Fzd6),ENSMUSG00000022548(Apod),ENSMUSG00000022836(Mylk),ENSMUSG00000022865…
CC	GO:0098948	intrinsic component of postsynaptic specialization membrane	10	45	55	105	1.9e-10	7.92038e-09	ENSMUSG00000000560(Gabra2),ENSMUSG00000020598(Nrcam),ENSMUSG00000022494(Shisa9),ENSMUSG00000024873(Cnih2),ENSMUSG00000025161(Slc16a3),ENSMUSG00000039579(Grin3a),ENSMUSG00000053930(Shisa6),ENSMUSG00000059003(Grin2a),ENSMUSG00000060780(Lrrtm1),ENSMUSG00000062209(Erbb4)	ENSMUSG00000003378(Grik5),ENSMUSG00000003934(Efnb3),ENSMUSG00000007653(Gabrb2),ENSMUSG00000013236(Ptprs),ENSMUSG00000020102(Slc16a7),ENSMUSG00000020431(Adcy1),ENSMUSG00000020524(Gria1),ENSMUSG00000021719(Rgs7bp),ENSMUSG00000022758(P2rx6),ENSMUSG00000024304(Cdh2),ENSMUSG00000025892(Gria4),ENSMUSG00000027107(Chrna1),ENSMUSG00000028289(Epha7),ENSMUSG00000029211(Gabra4),ENSMUSG00000030223(Ptpro),ENSM…
BP	GO:0045682	regulation of epidermis development	20	25	45	79	2e-10	8.31603e-09	ENSMUSG00000002250(Ppard),ENSMUSG00000003271(Sult2b1),ENSMUSG00000020580(Rock2),ENSMUSG00000020656(Grhl1),ENSMUSG00000020857(Nme2),ENSMUSG00000021054(Sgpp1),ENSMUSG00000021319(Sfrp4),ENSMUSG00000021765(Fst),ENSMUSG00000022996(Wnt10b),ENSMUSG00000028640(Tfap2c),ENSMUSG00000028967(Errfi1),ENSMUSG00000035273(Hpse),ENSMUSG00000039239(Tgfb2),ENSMUSG00000041324(Inhba),ENSMUSG00000042622(Maff),ENSMUSG00…	ENSMUSG00000000120(Ngfr),ENSMUSG00000001420(Tmem79),ENSMUSG00000019789(Hey2),ENSMUSG00000020086(Macroh2a2),ENSMUSG00000020891(Alox8),ENSMUSG00000021466(Ptch1),ENSMUSG00000021469(Msx2),ENSMUSG00000021835(Bmp4),ENSMUSG00000022286(Grhl2),ENSMUSG00000022510(Trp63),ENSMUSG00000024907(Gal),ENSMUSG00000027356(Fermt1),ENSMUSG00000028654(Mycl),ENSMUSG00000028681(Ptch2),ENSMUSG00000030117(Gdf3),ENSMUSG0000…
BP	GO:0071772	response to BMP	32	45	77	168	2.1e-10	8.68762e-09	ENSMUSG00000001507(Itga3),ENSMUSG00000002603(Tgfb1),ENSMUSG00000006205(Htra1),ENSMUSG00000006958(Chrd),ENSMUSG00000015619(Gata3),ENSMUSG00000016918(Sulf1),ENSMUSG00000018822(Sfrp5),ENSMUSG00000020325(Fstl3),ENSMUSG00000021319(Sfrp4),ENSMUSG00000021765(Fst),ENSMUSG00000022816(Fstl1),ENSMUSG00000022997(Wnt1),ENSMUSG00000024406(Pou5f1),ENSMUSG00000024868(Dkk1),ENSMUSG00000025880(Smad7),ENSMUSG000000…	ENSMUSG00000000567(Sox9),ENSMUSG00000001494(Sost),ENSMUSG00000002384(Bmp8b),ENSMUSG00000005836(Gata6),ENSMUSG00000008999(Bmp7),ENSMUSG00000018238(Gdf9),ENSMUSG00000021464(Ror2),ENSMUSG00000021469(Msx2),ENSMUSG00000021835(Bmp4),ENSMUSG00000021943(Gdf10),ENSMUSG00000024975(Pdcd4),ENSMUSG00000024985(Tcf7l2),ENSMUSG00000027070(Lrp2),ENSMUSG00000027315(Spint1),ENSMUSG00000027996(Sfrp2),ENSMUSG00000029…
BP	GO:0071773	cellular response to BMP stimulus	32	45	77	168	2.1e-10	8.68762e-09	ENSMUSG00000001507(Itga3),ENSMUSG00000002603(Tgfb1),ENSMUSG00000006205(Htra1),ENSMUSG00000006958(Chrd),ENSMUSG00000015619(Gata3),ENSMUSG00000016918(Sulf1),ENSMUSG00000018822(Sfrp5),ENSMUSG00000020325(Fstl3),ENSMUSG00000021319(Sfrp4),ENSMUSG00000021765(Fst),ENSMUSG00000022816(Fstl1),ENSMUSG00000022997(Wnt1),ENSMUSG00000024406(Pou5f1),ENSMUSG00000024868(Dkk1),ENSMUSG00000025880(Smad7),ENSMUSG000000…	ENSMUSG00000000567(Sox9),ENSMUSG00000001494(Sost),ENSMUSG00000002384(Bmp8b),ENSMUSG00000005836(Gata6),ENSMUSG00000008999(Bmp7),ENSMUSG00000018238(Gdf9),ENSMUSG00000021464(Ror2),ENSMUSG00000021469(Msx2),ENSMUSG00000021835(Bmp4),ENSMUSG00000021943(Gdf10),ENSMUSG00000024975(Pdcd4),ENSMUSG00000024985(Tcf7l2),ENSMUSG00000027070(Lrp2),ENSMUSG00000027315(Spint1),ENSMUSG00000027996(Sfrp2),ENSMUSG00000029…
BP	GO:1905114	cell surface receptor signaling pathway involved in cell-cell signaling	71	113	184	514	2.2e-10	9.07833e-09	ENSMUSG00000001507(Itga3),ENSMUSG00000002603(Tgfb1),ENSMUSG00000003032(Klf4),ENSMUSG00000003200(Sh3gl1),ENSMUSG00000006800(Sulf2),ENSMUSG00000013076(Amotl1),ENSMUSG00000015619(Gata3),ENSMUSG00000016918(Sulf1),ENSMUSG00000018822(Sfrp5),ENSMUSG00000020176(Grb10),ENSMUSG00000020393(Kremen1),ENSMUSG00000020566(Atp6v1c2),ENSMUSG00000021318(Gli3),ENSMUSG00000021319(Sfrp4),ENSMUSG00000021697(Depdc1b),EN…	ENSMUSG00000000120(Ngfr),ENSMUSG00000000126(Wnt9a),ENSMUSG00000000142(Axin2),ENSMUSG00000000567(Sox9),ENSMUSG00000000782(Tcf7),ENSMUSG00000001494(Sost),ENSMUSG00000002032(Tmem25),ENSMUSG00000002985(Apoe),ENSMUSG00000003352(Cacnb3),ENSMUSG00000003378(Grik5),ENSMUSG00000004558(Ndrg2),ENSMUSG00000007989(Fzd3),ENSMUSG00000010797(Wnt2),ENSMUSG00000015957(Wnt11),ENSMUSG00000018012(Rac3),ENSMUSG00000019…
BP	GO:0031344	regulation of cell projection organization	105	149	254	759	2.4e-10	9.87869e-09	ENSMUSG00000000305(Cdh4),ENSMUSG00000000708(Kat2b),ENSMUSG00000001227(Sema6b),ENSMUSG00000001507(Itga3),ENSMUSG00000001627(Ifrd1),ENSMUSG00000003032(Klf4),ENSMUSG00000004885(Crabp2),ENSMUSG00000004951(Hspb1),ENSMUSG00000005148(Klf5),ENSMUSG00000005672(Kit),ENSMUSG00000006304(Arpc2),ENSMUSG00000015533(Itga2),ENSMUSG00000015619(Gata3),ENSMUSG00000015766(Eps8),ENSMUSG00000017950(Hnf4a),ENSMUSG000000…	ENSMUSG00000000120(Ngfr),ENSMUSG00000000627(Sema4f),ENSMUSG00000000753(Serpinf1),ENSMUSG00000000861(Bcl11a),ENSMUSG00000002985(Apoe),ENSMUSG00000003934(Efnb3),ENSMUSG00000005087(Cd44),ENSMUSG00000005958(Ephb3),ENSMUSG00000006476(Nsmf),ENSMUSG00000006586(Runx1t1),ENSMUSG00000006930(Hap1),ENSMUSG00000008999(Bmp7),ENSMUSG00000013236(Ptprs),ENSMUSG00000014602(Kif1a),ENSMUSG00000015222(Map2),ENSMUSG00…
BP	GO:0006937	regulation of muscle contraction	35	37	72	154	2.6e-10	1.06483e-08	ENSMUSG00000005672(Kit),ENSMUSG00000006457(Actn3),ENSMUSG00000015533(Itga2),ENSMUSG00000017697(Ada),ENSMUSG00000018500(Adora2b),ENSMUSG00000019997(Ccn2),ENSMUSG00000021194(Chga),ENSMUSG00000021313(Ryr2),ENSMUSG00000021699(Pde4d),ENSMUSG00000024065(Ehd3),ENSMUSG00000025880(Smad7),ENSMUSG00000026313(Hdac4),ENSMUSG00000026360(Rgs2),ENSMUSG00000026418(Tnni1),ENSMUSG00000028420(Tmem38b),ENSMUSG0000002…	ENSMUSG00000005611(Mrvi1),ENSMUSG00000007122(Casq1),ENSMUSG00000018340(Anxa6),ENSMUSG00000020439(Smtn),ENSMUSG00000020787(P2rx1),ENSMUSG00000021367(Edn1),ENSMUSG00000026414(Tnnt2),ENSMUSG00000028004(Npy2r),ENSMUSG00000029761(Cald1),ENSMUSG00000030069(Prok2),ENSMUSG00000030409(Dmpk),ENSMUSG00000030592(Ryr1),ENSMUSG00000031097(Tnni2),ENSMUSG00000032826(Ank2),ENSMUSG00000035283(Adrb1),ENSMUSG0000003…
CC	GO:0016021	integral component of membrane	793	995	1788	6782	2.6e-10	1.06483e-08	ENSMUSG00000000216(Scnn1g),ENSMUSG00000000305(Cdh4),ENSMUSG00000000420(Galnt1),ENSMUSG00000000555(Itga5),ENSMUSG00000000560(Gabra2),ENSMUSG00000000706(Btn1a1),ENSMUSG00000000791(Il12rb1),ENSMUSG00000000792(Slc5a5),ENSMUSG00000000817(Fasl),ENSMUSG00000001029(Icam2),ENSMUSG00000001095(Slc13a2),ENSMUSG00000001227(Sema6b),ENSMUSG00000001260(Gabrg1),ENSMUSG00000001467(Cyp51),ENSMUSG00000001507(Itga3),…	ENSMUSG00000000120(Ngfr),ENSMUSG00000000154(Slc22a18),ENSMUSG00000000157(Itgb2l),ENSMUSG00000000159(Igsf5),ENSMUSG00000000303(Cdh1),ENSMUSG00000000385(Tmprss2),ENSMUSG00000000392(Fap),ENSMUSG00000000562(Adora3),ENSMUSG00000000627(Sema4f),ENSMUSG00000000732(Icosl),ENSMUSG00000000794(Kcnn3),ENSMUSG00000000881(Dlg3),ENSMUSG00000000889(Dbh),ENSMUSG00000000957(Mmp14),ENSMUSG00000001247(Lsr),ENSMUSG000…
BP	GO:0061458	reproductive system development	98	77	175	485	3e-10	1.22252e-08	ENSMUSG00000001510(Dlx3),ENSMUSG00000002250(Ppard),ENSMUSG00000004207(Psap),ENSMUSG00000005268(Prlr),ENSMUSG00000005672(Kit),ENSMUSG00000005883(Spo11),ENSMUSG00000006205(Htra1),ENSMUSG00000007659(Bcl2l1),ENSMUSG00000010760(Phlda2),ENSMUSG00000011256(Adam19),ENSMUSG00000012705(Retn),ENSMUSG00000015619(Gata3),ENSMUSG00000015812(Gnrh1),ENSMUSG00000016918(Sulf1),ENSMUSG00000017697(Ada),ENSMUSG0000001…	ENSMUSG00000000567(Sox9),ENSMUSG00000000730(Dnmt3l),ENSMUSG00000000753(Serpinf1),ENSMUSG00000000782(Tcf7),ENSMUSG00000000957(Mmp14),ENSMUSG00000002324(Rec8),ENSMUSG00000003282(Plag1),ENSMUSG00000005836(Gata6),ENSMUSG00000008999(Bmp7),ENSMUSG00000009248(Ascl2),ENSMUSG00000009628(Tex15),ENSMUSG00000010797(Wnt2),ENSMUSG00000014846(Tppp3),ENSMUSG00000018238(Gdf9),ENSMUSG00000019789(Hey2),ENSMUSG00000…
BP	GO:0009913	epidermal cell differentiation	35	46	81	181	3e-10	1.22252e-08	ENSMUSG00000003032(Klf4),ENSMUSG00000003271(Sult2b1),ENSMUSG00000004207(Psap),ENSMUSG00000005355(Casp14),ENSMUSG00000012819(Cdh23),ENSMUSG00000020580(Rock2),ENSMUSG00000020656(Grhl1),ENSMUSG00000020857(Nme2),ENSMUSG00000021054(Sgpp1),ENSMUSG00000021067(Sav1),ENSMUSG00000021319(Sfrp4),ENSMUSG00000022218(Tgm1),ENSMUSG00000023959(Clic5),ENSMUSG00000027399(Il1a),ENSMUSG00000028381(Ugcg),ENSMUSG000000…	ENSMUSG00000001420(Tmem79),ENSMUSG00000007034(Slc44a4),ENSMUSG00000019789(Hey2),ENSMUSG00000020086(Macroh2a2),ENSMUSG00000020701(Tmem132e),ENSMUSG00000020891(Alox8),ENSMUSG00000021466(Ptch1),ENSMUSG00000021469(Msx2),ENSMUSG00000021835(Bmp4),ENSMUSG00000022286(Grhl2),ENSMUSG00000022510(Trp63),ENSMUSG00000024136(Dnase1l2),ENSMUSG00000024922(Ovol1),ENSMUSG00000025407(Gli1),ENSMUSG00000026638(Irf6),E…
BP	GO:1904062	regulation of cation transmembrane transport	51	82	133	345	3.2e-10	1.30078e-08	ENSMUSG00000002603(Tgfb1),ENSMUSG00000009687(Fxyd5),ENSMUSG00000014077(Chp1),ENSMUSG00000017400(Stac2),ENSMUSG00000020689(Itgb3),ENSMUSG00000020722(Cacng1),ENSMUSG00000020793(Galr2),ENSMUSG00000021313(Ryr2),ENSMUSG00000021591(Glrx),ENSMUSG00000021699(Pde4d),ENSMUSG00000021730(Hcn1),ENSMUSG00000022494(Shisa9),ENSMUSG00000022602(Arc),ENSMUSG00000024065(Ehd3),ENSMUSG00000024873(Cnih2),ENSMUSG0000002…	ENSMUSG00000003352(Cacnb3),ENSMUSG00000004035(Gstm7),ENSMUSG00000004988(Fxyd4),ENSMUSG00000006930(Hap1),ENSMUSG00000007122(Casq1),ENSMUSG00000015968(Cacna1d),ENSMUSG00000017412(Cacnb4),ENSMUSG00000017817(Jph2),ENSMUSG00000019787(Trdn),ENSMUSG00000019933(Mrln),ENSMUSG00000020155(Kcnmb1),ENSMUSG00000020577(Tspan13),ENSMUSG00000020882(Cacnb1),ENSMUSG00000021559(Dapk1),ENSMUSG00000021835(Bmp4),ENSMUS…
CC	GO:0043235	receptor complex	63	81	144	380	3.3e-10	1.3381e-08	ENSMUSG00000000555(Itga5),ENSMUSG00000000560(Gabra2),ENSMUSG00000000791(Il12rb1),ENSMUSG00000001260(Gabrg1),ENSMUSG00000001507(Itga3),ENSMUSG00000002944(Cd36),ENSMUSG00000005268(Prlr),ENSMUSG00000005640(Insrr),ENSMUSG00000005672(Kit),ENSMUSG00000005763(Cd247),ENSMUSG00000015533(Itga2),ENSMUSG00000015766(Eps8),ENSMUSG00000020357(Flt4),ENSMUSG00000020689(Itgb3),ENSMUSG00000020963(Tshr),ENSMUSG00000…	ENSMUSG00000000157(Itgb2l),ENSMUSG00000000881(Dlg3),ENSMUSG00000001985(Grik3),ENSMUSG00000003378(Grik5),ENSMUSG00000003379(Cd79a),ENSMUSG00000005087(Cd44),ENSMUSG00000005533(Igf1r),ENSMUSG00000005947(Itgae),ENSMUSG00000005958(Ephb3),ENSMUSG00000007653(Gabrb2),ENSMUSG00000017417(Plxdc1),ENSMUSG00000019893(Ros1),ENSMUSG00000020524(Gria1),ENSMUSG00000020758(Itgb4),ENSMUSG00000021464(Ror2),ENSMUSG000…
BP	GO:0048598	embryonic morphogenesis	90	125	215	624	3.5e-10	1.41568e-08	ENSMUSG00000000555(Itga5),ENSMUSG00000001504(Irx2),ENSMUSG00000001507(Itga3),ENSMUSG00000001751(Naglu),ENSMUSG00000002603(Tgfb1),ENSMUSG00000003032(Klf4),ENSMUSG00000004885(Crabp2),ENSMUSG00000006958(Chrd),ENSMUSG00000010461(Eya4),ENSMUSG00000012819(Cdh23),ENSMUSG00000014030(Pax5),ENSMUSG00000015134(Aldh1a3),ENSMUSG00000015533(Itga2),ENSMUSG00000015619(Gata3),ENSMUSG00000015647(Lama5),ENSMUSG0000…	ENSMUSG00000000126(Wnt9a),ENSMUSG00000000567(Sox9),ENSMUSG00000000690(Hoxb6),ENSMUSG00000000782(Tcf7),ENSMUSG00000000957(Mmp14),ENSMUSG00000001119(Col6a1),ENSMUSG00000001249(Hpn),ENSMUSG00000001656(Hoxc11),ENSMUSG00000002384(Bmp8b),ENSMUSG00000004085(Map3k20),ENSMUSG00000005836(Gata6),ENSMUSG00000006538(Ihh),ENSMUSG00000007034(Slc44a4),ENSMUSG00000007877(Tcap),ENSMUSG00000007989(Fzd3),ENSMUSG0000…
BP	GO:0007409	axonogenesis	66	96	162	442	3.6e-10	1.45253e-08	ENSMUSG00000000305(Cdh4),ENSMUSG00000001227(Sema6b),ENSMUSG00000001627(Ifrd1),ENSMUSG00000004151(Etv1),ENSMUSG00000004885(Crabp2),ENSMUSG00000015619(Gata3),ENSMUSG00000017929(B4galt5),ENSMUSG00000020099(Unc5b),ENSMUSG00000020340(Cyfip2),ENSMUSG00000020598(Nrcam),ENSMUSG00000021068(Nin),ENSMUSG00000021318(Gli3),ENSMUSG00000021728(Emb),ENSMUSG00000022687(Boc),ENSMUSG00000023473(Celsr3),ENSMUSG00000…	ENSMUSG00000000120(Ngfr),ENSMUSG00000000627(Sema4f),ENSMUSG00000000861(Bcl11a),ENSMUSG00000002985(Apoe),ENSMUSG00000003934(Efnb3),ENSMUSG00000005958(Ephb3),ENSMUSG00000007989(Fzd3),ENSMUSG00000008575(Nfib),ENSMUSG00000008999(Bmp7),ENSMUSG00000011751(Sptbn4),ENSMUSG00000013236(Ptprs),ENSMUSG00000014704(Hoxa2),ENSMUSG00000015222(Map2),ENSMUSG00000020431(Adcy1),ENSMUSG00000020902(Ntn1),ENSMUSG000000…
BP	GO:0044092	negative regulation of molecular function	180	175	355	1128	3.7e-10	1.4892e-08	ENSMUSG00000000708(Kat2b),ENSMUSG00000000983(Wfdc18),ENSMUSG00000001131(Timp1),ENSMUSG00000003032(Klf4),ENSMUSG00000004535(Tax1bp1),ENSMUSG00000004951(Hspb1),ENSMUSG00000005054(Cstb),ENSMUSG00000005161(Prdx2),ENSMUSG00000005413(Hmox1),ENSMUSG00000006529(Itih1),ENSMUSG00000006574(Slc4a1),ENSMUSG00000007659(Bcl2l1),ENSMUSG00000011632(Pinlyp),ENSMUSG00000014077(Chp1),ENSMUSG00000015312(Gadd45b),ENSM…	ENSMUSG00000000126(Wnt9a),ENSMUSG00000000308(Ckmt1),ENSMUSG00000000753(Serpinf1),ENSMUSG00000000881(Dlg3),ENSMUSG00000001249(Hpn),ENSMUSG00000002289(Angptl4),ENSMUSG00000002985(Apoe),ENSMUSG00000003352(Cacnb3),ENSMUSG00000003452(Bicd1),ENSMUSG00000004035(Gstm7),ENSMUSG00000004231(Pax2),ENSMUSG00000005087(Cd44),ENSMUSG00000005533(Igf1r),ENSMUSG00000005718(Tfap4),ENSMUSG00000005824(Tnfsf14),ENSMUSG…
BP	GO:0060395	SMAD protein signal transduction	18	21	39	65	3.8e-10	1.5257e-08	ENSMUSG00000002603(Tgfb1),ENSMUSG00000007817(Zmiz1),ENSMUSG00000017950(Hnf4a),ENSMUSG00000021250(Fos),ENSMUSG00000025232(Hexa),ENSMUSG00000027358(Bmp2),ENSMUSG00000027698(Nceh1),ENSMUSG00000027796(Smad9),ENSMUSG00000027822(Slc33a1),ENSMUSG00000032726(Bmp8a),ENSMUSG00000037621(Atoh8),ENSMUSG00000039239(Tgfb2),ENSMUSG00000041324(Inhba),ENSMUSG00000051159(Cited1),ENSMUSG00000054932(Afp),ENSMUSG00000…	ENSMUSG00000002384(Bmp8b),ENSMUSG00000008999(Bmp7),ENSMUSG00000018238(Gdf9),ENSMUSG00000021464(Ror2),ENSMUSG00000021835(Bmp4),ENSMUSG00000021943(Gdf10),ENSMUSG00000025352(Gdf11),ENSMUSG00000029050(Ski),ENSMUSG00000029335(Bmp3),ENSMUSG00000029556(Hnf1a),ENSMUSG00000030117(Gdf3),ENSMUSG00000032179(Bmp5),ENSMUSG00000032554(Trf),ENSMUSG00000032968(Inha),ENSMUSG00000037035(Inhbb),ENSMUSG00000037660(Gd…
BP	GO:0048568	embryonic organ development	74	95	169	466	3.9e-10	1.55819e-08	ENSMUSG00000001751(Naglu),ENSMUSG00000002603(Tgfb1),ENSMUSG00000005672(Kit),ENSMUSG00000010461(Eya4),ENSMUSG00000010760(Phlda2),ENSMUSG00000012819(Cdh23),ENSMUSG00000014030(Pax5),ENSMUSG00000015134(Aldh1a3),ENSMUSG00000015619(Gata3),ENSMUSG00000017491(Rarb),ENSMUSG00000017697(Ada),ENSMUSG00000019558(Slc6a8),ENSMUSG00000020170(Frs2),ENSMUSG00000020185(E2f7),ENSMUSG00000020937(Plcd3),ENSMUSG0000002…	ENSMUSG00000000126(Wnt9a),ENSMUSG00000000567(Sox9),ENSMUSG00000000690(Hoxb6),ENSMUSG00000000782(Tcf7),ENSMUSG00000000957(Mmp14),ENSMUSG00000001249(Hpn),ENSMUSG00000001656(Hoxc11),ENSMUSG00000006538(Ihh),ENSMUSG00000007034(Slc44a4),ENSMUSG00000007877(Tcap),ENSMUSG00000007989(Fzd3),ENSMUSG00000008999(Bmp7),ENSMUSG00000009248(Ascl2),ENSMUSG00000010086(Rnf112),ENSMUSG00000010797(Wnt2),ENSMUSG00000014…
BP	GO:0040007	growth	155	166	321	1004	3.9e-10	1.55819e-08	ENSMUSG00000000305(Cdh4),ENSMUSG00000001227(Sema6b),ENSMUSG00000001627(Ifrd1),ENSMUSG00000002250(Ppard),ENSMUSG00000002603(Tgfb1),ENSMUSG00000004207(Psap),ENSMUSG00000004383(Large1),ENSMUSG00000004885(Crabp2),ENSMUSG00000005148(Klf5),ENSMUSG00000005268(Prlr),ENSMUSG00000006457(Actn3),ENSMUSG00000007659(Bcl2l1),ENSMUSG00000007817(Zmiz1),ENSMUSG00000010760(Phlda2),ENSMUSG00000015619(Gata3),ENSMUSG0…	ENSMUSG00000000567(Sox9),ENSMUSG00000000627(Sema4f),ENSMUSG00000000861(Bcl11a),ENSMUSG00000000957(Mmp14),ENSMUSG00000001119(Col6a1),ENSMUSG00000001249(Hpn),ENSMUSG00000001508(Sgca),ENSMUSG00000001583(Tnk1),ENSMUSG00000002985(Apoe),ENSMUSG00000003282(Plag1),ENSMUSG00000005089(Slc1a2),ENSMUSG00000005836(Gata6),ENSMUSG00000006538(Ihh),ENSMUSG00000007034(Slc44a4),ENSMUSG00000010797(Wnt2),ENSMUSG00000…
BP	GO:0006941	striated muscle contraction	31	45	76	167	4.1e-10	1.62617e-08	ENSMUSG00000006457(Actn3),ENSMUSG00000017400(Stac2),ENSMUSG00000018932(Map2k3),ENSMUSG00000019997(Ccn2),ENSMUSG00000020475(Pgam2),ENSMUSG00000021194(Chga),ENSMUSG00000021313(Ryr2),ENSMUSG00000021699(Pde4d),ENSMUSG00000024065(Ehd3),ENSMUSG00000025880(Smad7),ENSMUSG00000026313(Hdac4),ENSMUSG00000026360(Rgs2),ENSMUSG00000026418(Tnni1),ENSMUSG00000027488(Snta1),ENSMUSG00000028420(Tmem38b),ENSMUSG0000…	ENSMUSG00000007122(Casq1),ENSMUSG00000007877(Tcap),ENSMUSG00000015968(Cacna1d),ENSMUSG00000020439(Smtn),ENSMUSG00000020866(Cacna1g),ENSMUSG00000024049(Myom1),ENSMUSG00000026414(Tnnt2),ENSMUSG00000027107(Chrna1),ENSMUSG00000029361(Nos1),ENSMUSG00000030247(Kcnj8),ENSMUSG00000030409(Dmpk),ENSMUSG00000030739(Myh14),ENSMUSG00000031097(Tnni2),ENSMUSG00000032502(Stac),ENSMUSG00000032826(Ank2),ENSMUSG000…
BP	GO:0009991	response to extracellular stimulus	123	69	192	545	4.1e-10	1.62617e-08	ENSMUSG00000002250(Ppard),ENSMUSG00000002603(Tgfb1),ENSMUSG00000005413(Hmox1),ENSMUSG00000005891(Prl4a1),ENSMUSG00000006488(Prl7a1),ENSMUSG00000006490(Prl8a9),ENSMUSG00000009772(Nuak2),ENSMUSG00000010064(Slc38a3),ENSMUSG00000011148(Adssl1),ENSMUSG00000013629(Cad),ENSMUSG00000015533(Itga2),ENSMUSG00000017064(Prl5a1),ENSMUSG00000017311(Pyy),ENSMUSG00000017697(Ada),ENSMUSG00000017922(Prl3c1),ENSMUSG…	ENSMUSG00000001663(Gstt1),ENSMUSG00000002289(Angptl4),ENSMUSG00000002384(Bmp8b),ENSMUSG00000002985(Apoe),ENSMUSG00000003352(Cacnb3),ENSMUSG00000004231(Pax2),ENSMUSG00000005089(Slc1a2),ENSMUSG00000008999(Bmp7),ENSMUSG00000009350(Mpo),ENSMUSG00000015340(Cybb),ENSMUSG00000015568(Lpl),ENSMUSG00000015957(Wnt11),ENSMUSG00000017978(Cadps2),ENSMUSG00000020052(Ascl1),ENSMUSG00000020123(Avpr1a),ENSMUSG0000…
BP	GO:0015849	organic acid transport	59	66	125	320	4.1e-10	1.62617e-08	ENSMUSG00000002250(Ppard),ENSMUSG00000002944(Cd36),ENSMUSG00000004207(Psap),ENSMUSG00000005892(Trh),ENSMUSG00000006641(Slc5a6),ENSMUSG00000009646(Pla2g12b),ENSMUSG00000010064(Slc38a3),ENSMUSG00000010095(Slc3a2),ENSMUSG00000018796(Acsl1),ENSMUSG00000019558(Slc6a8),ENSMUSG00000020062(Slc5a8),ENSMUSG00000021265(Slc25a29),ENSMUSG00000021728(Emb),ENSMUSG00000022180(Slc7a8),ENSMUSG00000024600(Slc27a6),…	ENSMUSG00000002985(Apoe),ENSMUSG00000003484(Cyp4f18),ENSMUSG00000005089(Slc1a2),ENSMUSG00000005360(Slc1a3),ENSMUSG00000009378(Slc16a12),ENSMUSG00000017412(Cacnb4),ENSMUSG00000019894(Slc6a15),ENSMUSG00000020102(Slc16a7),ENSMUSG00000020123(Avpr1a),ENSMUSG00000020264(Slc36a2),ENSMUSG00000020333(Acsl6),ENSMUSG00000020600(Slc7a15),ENSMUSG00000020782(Llgl2),ENSMUSG00000020805(Slc13a5),ENSMUSG0000002107…
BP	GO:0023014	signal transduction by protein phosphorylation	126	135	261	788	4.3e-10	1.70136e-08	ENSMUSG00000001517(Foxm1),ENSMUSG00000002603(Tgfb1),ENSMUSG00000002944(Cd36),ENSMUSG00000003032(Klf4),ENSMUSG00000004207(Psap),ENSMUSG00000004371(Il11),ENSMUSG00000005161(Prdx2),ENSMUSG00000005672(Kit),ENSMUSG00000015312(Gadd45b),ENSMUSG00000017446(C1qtnf1),ENSMUSG00000018334(Ksr1),ENSMUSG00000018648(Dusp14),ENSMUSG00000018821(Avpi1),ENSMUSG00000018932(Map2k3),ENSMUSG00000019579(Mydgf),ENSMUSG000…	ENSMUSG00000000120(Ngfr),ENSMUSG00000000567(Sox9),ENSMUSG00000001672(Marveld3),ENSMUSG00000002384(Bmp8b),ENSMUSG00000002985(Apoe),ENSMUSG00000004085(Map3k20),ENSMUSG00000004558(Ndrg2),ENSMUSG00000004864(Mapk13),ENSMUSG00000005087(Cd44),ENSMUSG00000005320(Fgfr4),ENSMUSG00000005533(Igf1r),ENSMUSG00000008999(Bmp7),ENSMUSG00000015950(Ncf1),ENSMUSG00000017386(Traf4),ENSMUSG00000018849(Wwc1),ENSMUSG000…
BP	GO:0001763	morphogenesis of a branching structure	34	58	92	216	4.9e-10	1.92942e-08	ENSMUSG00000002603(Tgfb1),ENSMUSG00000004791(Pgf),ENSMUSG00000015468(Notch4),ENSMUSG00000015647(Lama5),ENSMUSG00000016918(Sulf1),ENSMUSG00000020170(Frs2),ENSMUSG00000021318(Gli3),ENSMUSG00000021782(Dlg5),ENSMUSG00000022997(Wnt1),ENSMUSG00000025746(Il6),ENSMUSG00000027358(Bmp2),ENSMUSG00000027833(Shox2),ENSMUSG00000028640(Tfap2c),ENSMUSG00000029231(Pdgfra),ENSMUSG00000030218(Mgp),ENSMUSG0000003079…	ENSMUSG00000000567(Sox9),ENSMUSG00000000861(Bcl11a),ENSMUSG00000000957(Mmp14),ENSMUSG00000004231(Pax2),ENSMUSG00000006538(Ihh),ENSMUSG00000008999(Bmp7),ENSMUSG00000009376(Met),ENSMUSG00000010797(Wnt2),ENSMUSG00000013089(Etv5),ENSMUSG00000019880(Rspo3),ENSMUSG00000020019(Ntn4),ENSMUSG00000020676(Ccl11),ENSMUSG00000020782(Llgl2),ENSMUSG00000021367(Edn1),ENSMUSG00000021466(Ptch1),ENSMUSG00000021469(…
CC	GO:0098552	side of membrane	99	108	207	596	4.9e-10	1.92942e-08	ENSMUSG00000000001(Gnai3),ENSMUSG00000000216(Scnn1g),ENSMUSG00000000555(Itga5),ENSMUSG00000000594(Gm2a),ENSMUSG00000000706(Btn1a1),ENSMUSG00000000791(Il12rb1),ENSMUSG00000000805(Car4),ENSMUSG00000000817(Fasl),ENSMUSG00000001025(S100a6),ENSMUSG00000001507(Itga3),ENSMUSG00000002944(Cd36),ENSMUSG00000003814(Calr),ENSMUSG00000004709(Cd244a),ENSMUSG00000005268(Prlr),ENSMUSG00000005672(Kit),ENSMUSG0000…	ENSMUSG00000000120(Ngfr),ENSMUSG00000000303(Cdh1),ENSMUSG00000000732(Icosl),ENSMUSG00000000869(Il4),ENSMUSG00000001583(Tnk1),ENSMUSG00000002985(Apoe),ENSMUSG00000003379(Cd79a),ENSMUSG00000003882(Il7r),ENSMUSG00000004730(Adgre1),ENSMUSG00000005947(Itgae),ENSMUSG00000006576(Slc4a3),ENSMUSG00000010797(Wnt2),ENSMUSG00000014453(Blk),ENSMUSG00000015396(Cd83),ENSMUSG00000018566(Slc2a4),ENSMUSG0000001892…
BP	GO:0014706	striated muscle tissue development	73	76	149	400	5e-10	1.96406e-08	ENSMUSG00000001627(Ifrd1),ENSMUSG00000002603(Tgfb1),ENSMUSG00000003814(Calr),ENSMUSG00000005148(Klf5),ENSMUSG00000006457(Actn3),ENSMUSG00000014030(Pax5),ENSMUSG00000017491(Rarb),ENSMUSG00000019848(Popdc3),ENSMUSG00000020170(Frs2),ENSMUSG00000021067(Sav1),ENSMUSG00000021250(Fos),ENSMUSG00000021313(Ryr2),ENSMUSG00000021670(Hmgcr),ENSMUSG00000022371(Col14a1),ENSMUSG00000022996(Wnt10b),ENSMUSG0000002…	ENSMUSG00000002007(Srpk3),ENSMUSG00000005836(Gata6),ENSMUSG00000007122(Casq1),ENSMUSG00000007877(Tcap),ENSMUSG00000008136(Fhl2),ENSMUSG00000008658(Rbfox1),ENSMUSG00000008999(Bmp7),ENSMUSG00000010797(Wnt2),ENSMUSG00000017817(Jph2),ENSMUSG00000017897(Eya2),ENSMUSG00000018830(Myh11),ENSMUSG00000019789(Hey2),ENSMUSG00000019929(Dcn),ENSMUSG00000021200(Asb2),ENSMUSG00000021367(Edn1),ENSMUSG00000021775(…
MF	GO:0008092	cytoskeletal protein binding	124	189	313	972	5.9e-10	2.31204e-08	ENSMUSG00000000305(Cdh4),ENSMUSG00000001020(S100a4),ENSMUSG00000001025(S100a6),ENSMUSG00000001864(Aif1l),ENSMUSG00000002565(Scin),ENSMUSG00000003779(Kif20a),ENSMUSG00000005125(Ndrg1),ENSMUSG00000006221(Hspb7),ENSMUSG00000006304(Arpc2),ENSMUSG00000006457(Actn3),ENSMUSG00000006574(Slc4a1),ENSMUSG00000008475(Arpc5),ENSMUSG00000009687(Fxyd5),ENSMUSG00000011148(Adssl1),ENSMUSG00000012819(Cdh23),ENSMUS…	ENSMUSG00000000303(Cdh1),ENSMUSG00000001349(Cnn1),ENSMUSG00000002985(Apoe),ENSMUSG00000003411(Rab3b),ENSMUSG00000003452(Bicd1),ENSMUSG00000004187(Kifc2),ENSMUSG00000005628(Tmod4),ENSMUSG00000006219(Fblim1),ENSMUSG00000006930(Hap1),ENSMUSG00000007877(Tcap),ENSMUSG00000008601(Rab25),ENSMUSG00000010021(Kif19a),ENSMUSG00000011589(Fsd1),ENSMUSG00000011751(Sptbn4),ENSMUSG00000013921(Clip3),ENSMUSG00000…
BP	GO:0009893	positive regulation of metabolic process	458	524	982	3556	6.9e-10	2.691e-08	ENSMUSG00000000001(Gnai3),ENSMUSG00000000555(Itga5),ENSMUSG00000000628(Hk2),ENSMUSG00000000708(Kat2b),ENSMUSG00000000817(Fasl),ENSMUSG00000001507(Itga3),ENSMUSG00000001510(Dlx3),ENSMUSG00000001517(Foxm1),ENSMUSG00000001542(Ell2),ENSMUSG00000001627(Ifrd1),ENSMUSG00000002015(Bcap31),ENSMUSG00000002250(Ppard),ENSMUSG00000002603(Tgfb1),ENSMUSG00000002944(Cd36),ENSMUSG00000003032(Klf4),ENSMUSG00000003…	ENSMUSG00000000120(Ngfr),ENSMUSG00000000142(Axin2),ENSMUSG00000000184(Ccnd2),ENSMUSG00000000303(Cdh1),ENSMUSG00000000320(Alox12),ENSMUSG00000000567(Sox9),ENSMUSG00000000730(Dnmt3l),ENSMUSG00000000731(Aire),ENSMUSG00000000732(Icosl),ENSMUSG00000000861(Bcl11a),ENSMUSG00000000869(Il4),ENSMUSG00000000881(Dlg3),ENSMUSG00000000957(Mmp14),ENSMUSG00000001249(Hpn),ENSMUSG00000001494(Sost),ENSMUSG000000016…
BP	GO:0046942	carboxylic acid transport	59	65	124	319	6.9e-10	2.691e-08	ENSMUSG00000002250(Ppard),ENSMUSG00000002944(Cd36),ENSMUSG00000004207(Psap),ENSMUSG00000005892(Trh),ENSMUSG00000006641(Slc5a6),ENSMUSG00000009646(Pla2g12b),ENSMUSG00000010064(Slc38a3),ENSMUSG00000010095(Slc3a2),ENSMUSG00000018796(Acsl1),ENSMUSG00000019558(Slc6a8),ENSMUSG00000020062(Slc5a8),ENSMUSG00000021265(Slc25a29),ENSMUSG00000021728(Emb),ENSMUSG00000022180(Slc7a8),ENSMUSG00000024600(Slc27a6),…	ENSMUSG00000002985(Apoe),ENSMUSG00000003484(Cyp4f18),ENSMUSG00000005089(Slc1a2),ENSMUSG00000005360(Slc1a3),ENSMUSG00000009378(Slc16a12),ENSMUSG00000017412(Cacnb4),ENSMUSG00000019894(Slc6a15),ENSMUSG00000020102(Slc16a7),ENSMUSG00000020123(Avpr1a),ENSMUSG00000020264(Slc36a2),ENSMUSG00000020333(Acsl6),ENSMUSG00000020600(Slc7a15),ENSMUSG00000020782(Llgl2),ENSMUSG00000020805(Slc13a5),ENSMUSG0000002107…
CC	GO:0042734	presynaptic membrane	22	60	82	186	7e-10	2.7235e-08	ENSMUSG00000020368(Canx),ENSMUSG00000024912(Fosl1),ENSMUSG00000025178(Pi4k2a),ENSMUSG00000025496(Drd4),ENSMUSG00000027273(Snap25),ENSMUSG00000031119(Gpc4),ENSMUSG00000031217(Efnb1),ENSMUSG00000032012(Nectin1),ENSMUSG00000035566(Pcdh17),ENSMUSG00000039714(Cplx3),ENSMUSG00000040907(Atp1a3),ENSMUSG00000042429(Adora1),ENSMUSG00000047547(Cltb),ENSMUSG00000047976(Kcna1),ENSMUSG00000049511(Htr1b),ENSMUS…	ENSMUSG00000001985(Grik3),ENSMUSG00000003378(Grik5),ENSMUSG00000003934(Efnb3),ENSMUSG00000005089(Slc1a2),ENSMUSG00000013236(Ptprs),ENSMUSG00000015968(Cacna1d),ENSMUSG00000017167(Cntnap1),ENSMUSG00000017978(Cadps2),ENSMUSG00000020524(Gria1),ENSMUSG00000020787(P2rx1),ENSMUSG00000020838(Slc6a4),ENSMUSG00000021719(Rgs7bp),ENSMUSG00000022456(Septin3),ENSMUSG00000024211(Grm8),ENSMUSG00000024304(Cdh2),E…
MF	GO:0042802	identical protein binding	287	288	575	1951	7.2e-10	2.78145e-08	ENSMUSG00000001020(S100a4),ENSMUSG00000001023(S100a5),ENSMUSG00000001025(S100a6),ENSMUSG00000002603(Tgfb1),ENSMUSG00000003200(Sh3gl1),ENSMUSG00000003665(Has1),ENSMUSG00000004207(Psap),ENSMUSG00000004791(Pgf),ENSMUSG00000004951(Hspb1),ENSMUSG00000005057(Sh2b2),ENSMUSG00000005413(Hmox1),ENSMUSG00000005672(Kit),ENSMUSG00000005763(Cd247),ENSMUSG00000006205(Htra1),ENSMUSG00000006216(Clcnkb),ENSMUSG000…	ENSMUSG00000000120(Ngfr),ENSMUSG00000000303(Cdh1),ENSMUSG00000000308(Ckmt1),ENSMUSG00000000392(Fap),ENSMUSG00000000731(Aire),ENSMUSG00000000732(Icosl),ENSMUSG00000001420(Tmem79),ENSMUSG00000001435(Col18a1),ENSMUSG00000002289(Angptl4),ENSMUSG00000002985(Apoe),ENSMUSG00000003378(Grik5),ENSMUSG00000003379(Cd79a),ENSMUSG00000004032(Gstm5),ENSMUSG00000004035(Gstm7),ENSMUSG00000004552(Ctse),ENSMUSG0000…
BP	GO:0060048	cardiac muscle contraction	26	35	61	125	7.2e-10	2.78145e-08	ENSMUSG00000018932(Map2k3),ENSMUSG00000019997(Ccn2),ENSMUSG00000021194(Chga),ENSMUSG00000021313(Ryr2),ENSMUSG00000021699(Pde4d),ENSMUSG00000024065(Ehd3),ENSMUSG00000025880(Smad7),ENSMUSG00000026313(Hdac4),ENSMUSG00000026360(Rgs2),ENSMUSG00000026418(Tnni1),ENSMUSG00000027488(Snta1),ENSMUSG00000028420(Tmem38b),ENSMUSG00000028854(Slc9a1),ENSMUSG00000030470(Csrp3),ENSMUSG00000032338(Hcn4),ENSMUSG0000…	ENSMUSG00000007877(Tcap),ENSMUSG00000015968(Cacna1d),ENSMUSG00000020439(Smtn),ENSMUSG00000020866(Cacna1g),ENSMUSG00000026414(Tnnt2),ENSMUSG00000030247(Kcnj8),ENSMUSG00000031097(Tnni2),ENSMUSG00000032826(Ank2),ENSMUSG00000035283(Adrb1),ENSMUSG00000035458(Tnni3),ENSMUSG00000036570(Fxyd1),ENSMUSG00000038319(Kcnh2),ENSMUSG00000038583(Pln),ENSMUSG00000040118(Cacna2d1),ENSMUSG00000044393(Dsg2),ENSMUSG0…
BP	GO:0097756	negative regulation of blood vessel diameter	29	23	52	100	7.2e-10	2.78145e-08	ENSMUSG00000021194(Chga),ENSMUSG00000021670(Hmgcr),ENSMUSG00000022122(Ednrb),ENSMUSG00000025026(Add3),ENSMUSG00000025701(Alox5),ENSMUSG00000026228(Htr2b),ENSMUSG00000027488(Snta1),ENSMUSG00000028001(Fga),ENSMUSG00000028635(Edn2),ENSMUSG00000029084(Cd38),ENSMUSG00000030098(Grip2),ENSMUSG00000030790(Adm),ENSMUSG00000031400(G6pdx),ENSMUSG00000031778(Cx3cl1),ENSMUSG00000032487(Ptgs2),ENSMUSG000000331…	ENSMUSG00000000889(Dbh),ENSMUSG00000020123(Avpr1a),ENSMUSG00000020787(P2rx1),ENSMUSG00000020838(Slc6a4),ENSMUSG00000020866(Cacna1g),ENSMUSG00000021070(Bdkrb2),ENSMUSG00000021367(Edn1),ENSMUSG00000027524(Edn3),ENSMUSG00000029361(Nos1),ENSMUSG00000029925(Tbxas1),ENSMUSG00000031616(Ednra),ENSMUSG00000031906(Smpd3),ENSMUSG00000034997(Htr2a),ENSMUSG00000035783(Acta2),ENSMUSG00000036437(Npy1r),ENSMUSG0…
BP	GO:0051128	regulation of cellular component organization	331	391	722	2534	8.3e-10	3.19883e-08	ENSMUSG00000000028(Cdc45),ENSMUSG00000000305(Cdh4),ENSMUSG00000000628(Hk2),ENSMUSG00000000708(Kat2b),ENSMUSG00000001227(Sema6b),ENSMUSG00000001403(Ube2c),ENSMUSG00000001507(Itga3),ENSMUSG00000001627(Ifrd1),ENSMUSG00000002233(Rhoc),ENSMUSG00000002250(Ppard),ENSMUSG00000002565(Scin),ENSMUSG00000002603(Tgfb1),ENSMUSG00000002944(Cd36),ENSMUSG00000003032(Klf4),ENSMUSG00000003200(Sh3gl1),ENSMUSG0000000…	ENSMUSG00000000120(Ngfr),ENSMUSG00000000142(Axin2),ENSMUSG00000000392(Fap),ENSMUSG00000000416(Cttnbp2),ENSMUSG00000000567(Sox9),ENSMUSG00000000627(Sema4f),ENSMUSG00000000753(Serpinf1),ENSMUSG00000000861(Bcl11a),ENSMUSG00000000869(Il4),ENSMUSG00000000957(Mmp14),ENSMUSG00000001249(Hpn),ENSMUSG00000001494(Sost),ENSMUSG00000001583(Tnk1),ENSMUSG00000002104(Rapsn),ENSMUSG00000002985(Apoe),ENSMUSG000000…
BP	GO:0051963	regulation of synapse assembly	15	43	58	117	8.7e-10	3.3451e-08	ENSMUSG00000021782(Dlg5),ENSMUSG00000024868(Dkk1),ENSMUSG00000025020(Slit1),ENSMUSG00000025889(Snca),ENSMUSG00000028072(Ntrk1),ENSMUSG00000028273(Pdlim5),ENSMUSG00000031119(Gpc4),ENSMUSG00000031654(Cbln1),ENSMUSG00000032012(Nectin1),ENSMUSG00000042700(Sipa1l1),ENSMUSG00000044674(Fzd1),ENSMUSG00000048482(Bdnf),ENSMUSG00000057280(Musk),ENSMUSG00000058571(Gpc6),ENSMUSG00000060780(Lrrtm1)	ENSMUSG00000005958(Ephb3),ENSMUSG00000013236(Ptprs),ENSMUSG00000020902(Ntn1),ENSMUSG00000023885(Thbs2),ENSMUSG00000025582(Nptx1),ENSMUSG00000028289(Epha7),ENSMUSG00000028399(Ptprd),ENSMUSG00000028782(Adgrb2),ENSMUSG00000030093(Wnt7a),ENSMUSG00000031253(Srpx2),ENSMUSG00000031302(Nlgn3),ENSMUSG00000032452(Clstn2),ENSMUSG00000032827(Ppp1r9a),ENSMUSG00000033569(Adgrb3),ENSMUSG00000033707(Lrrc24),ENSM…
BP	GO:1903524	positive regulation of blood circulation	26	21	47	87	8.9e-10	3.41396e-08	ENSMUSG00000017697(Ada),ENSMUSG00000019997(Ccn2),ENSMUSG00000021194(Chga),ENSMUSG00000021313(Ryr2),ENSMUSG00000025026(Add3),ENSMUSG00000025701(Alox5),ENSMUSG00000026360(Rgs2),ENSMUSG00000028001(Fga),ENSMUSG00000028635(Edn2),ENSMUSG00000029084(Cd38),ENSMUSG00000029236(Nmu),ENSMUSG00000030790(Adm),ENSMUSG00000032487(Ptgs2),ENSMUSG00000032511(Scn5a),ENSMUSG00000034987(Hrh2),ENSMUSG00000036867(Smad6)…	ENSMUSG00000000889(Dbh),ENSMUSG00000019789(Hey2),ENSMUSG00000020123(Avpr1a),ENSMUSG00000020439(Smtn),ENSMUSG00000021367(Edn1),ENSMUSG00000021678(F2rl1),ENSMUSG00000024027(Glp1r),ENSMUSG00000024935(Slc1a1),ENSMUSG00000027524(Edn3),ENSMUSG00000029925(Tbxas1),ENSMUSG00000030525(Chrna7),ENSMUSG00000034997(Htr2a),ENSMUSG00000035283(Adrb1),ENSMUSG00000036437(Npy1r),ENSMUSG00000043366(Olfr78),ENSMUSG000…
BP	GO:0071702	organic substance transport	375	359	734	2582	9e-10	3.44424e-08	ENSMUSG00000000594(Gm2a),ENSMUSG00000000628(Hk2),ENSMUSG00000000706(Btn1a1),ENSMUSG00000000805(Car4),ENSMUSG00000001467(Cyp51),ENSMUSG00000002015(Bcap31),ENSMUSG00000002250(Ppard),ENSMUSG00000002603(Tgfb1),ENSMUSG00000002944(Cd36),ENSMUSG00000002957(Ap2a2),ENSMUSG00000003153(Slc2a3),ENSMUSG00000003779(Kif20a),ENSMUSG00000003814(Calr),ENSMUSG00000004207(Psap),ENSMUSG00000004668(Abca13),ENSMUSG0000…	ENSMUSG00000000120(Ngfr),ENSMUSG00000000303(Cdh1),ENSMUSG00000000903(Vpreb3),ENSMUSG00000001247(Lsr),ENSMUSG00000001741(Il16),ENSMUSG00000002346(Slc25a42),ENSMUSG00000002985(Apoe),ENSMUSG00000003309(Ap1m2),ENSMUSG00000003352(Cacnb3),ENSMUSG00000003411(Rab3b),ENSMUSG00000003484(Cyp4f18),ENSMUSG00000003872(Lin7b),ENSMUSG00000004347(Pde1c),ENSMUSG00000005089(Slc1a2),ENSMUSG00000005131(4930550C14Rik)…
BP	GO:0006939	smooth muscle contraction	26	28	54	106	9.2e-10	3.51255e-08	ENSMUSG00000005672(Kit),ENSMUSG00000006800(Sulf2),ENSMUSG00000015533(Itga2),ENSMUSG00000016918(Sulf1),ENSMUSG00000017697(Ada),ENSMUSG00000018500(Adora2b),ENSMUSG00000020580(Rock2),ENSMUSG00000021699(Pde4d),ENSMUSG00000022122(Ednrb),ENSMUSG00000026228(Htr2b),ENSMUSG00000026360(Rgs2),ENSMUSG00000028635(Edn2),ENSMUSG00000029084(Cd38),ENSMUSG00000029236(Nmu),ENSMUSG00000030098(Grip2),ENSMUSG000000306…	ENSMUSG00000005611(Mrvi1),ENSMUSG00000020787(P2rx1),ENSMUSG00000020866(Cacna1g),ENSMUSG00000021070(Bdkrb2),ENSMUSG00000021367(Edn1),ENSMUSG00000022144(Gdnf),ENSMUSG00000022836(Mylk),ENSMUSG00000026237(Nmur1),ENSMUSG00000026463(Atp2b4),ENSMUSG00000027524(Edn3),ENSMUSG00000028004(Npy2r),ENSMUSG00000029761(Cald1),ENSMUSG00000030069(Prok2),ENSMUSG00000031616(Ednra),ENSMUSG00000031906(Smpd3),ENSMUSG00…
BP	GO:0061138	morphogenesis of a branching epithelium	32	53	85	197	1e-09	3.80023e-08	ENSMUSG00000002603(Tgfb1),ENSMUSG00000004791(Pgf),ENSMUSG00000015468(Notch4),ENSMUSG00000015647(Lama5),ENSMUSG00000016918(Sulf1),ENSMUSG00000020170(Frs2),ENSMUSG00000021318(Gli3),ENSMUSG00000021782(Dlg5),ENSMUSG00000022997(Wnt1),ENSMUSG00000025746(Il6),ENSMUSG00000027358(Bmp2),ENSMUSG00000028640(Tfap2c),ENSMUSG00000029231(Pdgfra),ENSMUSG00000030218(Mgp),ENSMUSG00000030790(Adm),ENSMUSG00000031502(…	ENSMUSG00000000567(Sox9),ENSMUSG00000000957(Mmp14),ENSMUSG00000004231(Pax2),ENSMUSG00000006538(Ihh),ENSMUSG00000008999(Bmp7),ENSMUSG00000009376(Met),ENSMUSG00000010797(Wnt2),ENSMUSG00000013089(Etv5),ENSMUSG00000019880(Rspo3),ENSMUSG00000020019(Ntn4),ENSMUSG00000020676(Ccl11),ENSMUSG00000020782(Llgl2),ENSMUSG00000021367(Edn1),ENSMUSG00000021466(Ptch1),ENSMUSG00000021469(Msx2),ENSMUSG00000021835(Bm…
BP	GO:0010243	response to organonitrogen compound	185	136	321	1012	1e-09	3.80023e-08	ENSMUSG00000000708(Kat2b),ENSMUSG00000000792(Slc5a5),ENSMUSG00000001131(Timp1),ENSMUSG00000001642(Akr1b3),ENSMUSG00000002015(Bcap31),ENSMUSG00000002603(Tgfb1),ENSMUSG00000002944(Cd36),ENSMUSG00000003032(Klf4),ENSMUSG00000004113(Cacna1b),ENSMUSG00000005057(Sh2b2),ENSMUSG00000005148(Klf5),ENSMUSG00000005640(Insrr),ENSMUSG00000006304(Arpc2),ENSMUSG00000006589(Aprt),ENSMUSG00000007659(Bcl2l1),ENSMUSG…	ENSMUSG00000000120(Ngfr),ENSMUSG00000000303(Cdh1),ENSMUSG00000000567(Sox9),ENSMUSG00000000861(Bcl11a),ENSMUSG00000000889(Dbh),ENSMUSG00000001119(Col6a1),ENSMUSG00000002985(Apoe),ENSMUSG00000004035(Gstm7),ENSMUSG00000004864(Mapk13),ENSMUSG00000005089(Slc1a2),ENSMUSG00000005360(Slc1a3),ENSMUSG00000005533(Igf1r),ENSMUSG00000005705(Agrp),ENSMUSG00000006476(Nsmf),ENSMUSG00000007653(Gabrb2),ENSMUSG0000…
MF	GO:0022804	active transmembrane transporter activity	67	68	135	355	1.1e-09	4.1609e-08	ENSMUSG00000000792(Slc5a5),ENSMUSG00000001095(Slc13a2),ENSMUSG00000004668(Abca13),ENSMUSG00000006567(Atp7b),ENSMUSG00000006574(Slc4a1),ENSMUSG00000006641(Slc5a6),ENSMUSG00000010064(Slc38a3),ENSMUSG00000010122(Slc47a1),ENSMUSG00000013701(Timm23),ENSMUSG00000015575(Atp6v0e),ENSMUSG00000018770(Atp5g3),ENSMUSG00000018800(Abca5),ENSMUSG00000018900(Slc22a5),ENSMUSG00000019210(Atp6v1e1),ENSMUSG000000195…	ENSMUSG00000005089(Slc1a2),ENSMUSG00000005360(Slc1a3),ENSMUSG00000006576(Slc4a3),ENSMUSG00000007107(Atp1a4),ENSMUSG00000009378(Slc16a12),ENSMUSG00000018566(Slc2a4),ENSMUSG00000019894(Slc6a15),ENSMUSG00000020102(Slc16a7),ENSMUSG00000020264(Slc36a2),ENSMUSG00000020788(Atp2a3),ENSMUSG00000020805(Slc13a5),ENSMUSG00000020838(Slc6a4),ENSMUSG00000020865(Abcc3),ENSMUSG00000021553(Slc28a3),ENSMUSG00000022…
BP	GO:1903530	regulation of secretion by cell	117	145	262	798	1.1e-09	4.1609e-08	ENSMUSG00000000706(Btn1a1),ENSMUSG00000001467(Cyp51),ENSMUSG00000002250(Ppard),ENSMUSG00000002603(Tgfb1),ENSMUSG00000002944(Cd36),ENSMUSG00000004113(Cacna1b),ENSMUSG00000004371(Il11),ENSMUSG00000004709(Cd244a),ENSMUSG00000005413(Hmox1),ENSMUSG00000005892(Trh),ENSMUSG00000007659(Bcl2l1),ENSMUSG00000012705(Retn),ENSMUSG00000015619(Gata3),ENSMUSG00000017446(C1qtnf1),ENSMUSG00000017716(Birc5),ENSMUSG…	ENSMUSG00000000869(Il4),ENSMUSG00000000903(Vpreb3),ENSMUSG00000001741(Il16),ENSMUSG00000002985(Apoe),ENSMUSG00000003378(Grik5),ENSMUSG00000003411(Rab3b),ENSMUSG00000004347(Pde1c),ENSMUSG00000006930(Hap1),ENSMUSG00000014453(Blk),ENSMUSG00000015568(Lpl),ENSMUSG00000015966(Il17rb),ENSMUSG00000015968(Cacna1d),ENSMUSG00000017412(Cacnb4),ENSMUSG00000017978(Cadps2),ENSMUSG00000018238(Gdf9),ENSMUSG000000…
BP	GO:0007178	transmembrane receptor protein serine/threonine kinase signaling pathway	59	67	126	328	1.2e-09	4.51825e-08	ENSMUSG00000001507(Itga3),ENSMUSG00000002603(Tgfb1),ENSMUSG00000006205(Htra1),ENSMUSG00000006958(Chrd),ENSMUSG00000007817(Zmiz1),ENSMUSG00000016918(Sulf1),ENSMUSG00000017950(Hnf4a),ENSMUSG00000018822(Sfrp5),ENSMUSG00000020315(Sptbn1),ENSMUSG00000020325(Fstl3),ENSMUSG00000020484(Xbp1),ENSMUSG00000021065(Fut8),ENSMUSG00000021250(Fos),ENSMUSG00000021319(Sfrp4),ENSMUSG00000021765(Fst),ENSMUSG00000022…	ENSMUSG00000001494(Sost),ENSMUSG00000001870(Ltbp1),ENSMUSG00000002384(Bmp8b),ENSMUSG00000005836(Gata6),ENSMUSG00000008999(Bmp7),ENSMUSG00000013766(Ly6g6e),ENSMUSG00000018238(Gdf9),ENSMUSG00000021388(Aspn),ENSMUSG00000021464(Ror2),ENSMUSG00000021469(Msx2),ENSMUSG00000021835(Bmp4),ENSMUSG00000021943(Gdf10),ENSMUSG00000022144(Gdnf),ENSMUSG00000024544(Ldlrad4),ENSMUSG00000024837(Dmrt1),ENSMUSG0000002…
BP	GO:1903489	positive regulation of lactation	21	0	21	26	1.2e-09	4.51825e-08	ENSMUSG00000005891(Prl4a1),ENSMUSG00000006488(Prl7a1),ENSMUSG00000006490(Prl8a9),ENSMUSG00000017064(Prl5a1),ENSMUSG00000017922(Prl3c1),ENSMUSG00000018259(Prl8a2),ENSMUSG00000019756(Prl8a1),ENSMUSG00000020484(Xbp1),ENSMUSG00000021345(Prl8a6),ENSMUSG00000021347(Prl7b1),ENSMUSG00000021348(Prl7d1),ENSMUSG00000022886(Prl2a1),ENSMUSG00000038883(Prl3a1),ENSMUSG00000038891(Prl3b1),ENSMUSG00000046899(Prl7…	-
BP	GO:0033993	response to lipid	166	145	311	977	1.3e-09	4.87232e-08	ENSMUSG00000000817(Fasl),ENSMUSG00000002250(Ppard),ENSMUSG00000002603(Tgfb1),ENSMUSG00000002944(Cd36),ENSMUSG00000003032(Klf4),ENSMUSG00000003814(Calr),ENSMUSG00000004031(Brinp2),ENSMUSG00000004113(Cacna1b),ENSMUSG00000005161(Prdx2),ENSMUSG00000005892(Trh),ENSMUSG00000006345(Ggt1),ENSMUSG00000007817(Zmiz1),ENSMUSG00000013629(Cad),ENSMUSG00000015533(Itga2),ENSMUSG00000015812(Gnrh1),ENSMUSG00000016…	ENSMUSG00000000320(Alox12),ENSMUSG00000000567(Sox9),ENSMUSG00000000753(Serpinf1),ENSMUSG00000005718(Tfap4),ENSMUSG00000006538(Ihh),ENSMUSG00000008855(Hdac5),ENSMUSG00000008999(Bmp7),ENSMUSG00000009350(Mpo),ENSMUSG00000014704(Hoxa2),ENSMUSG00000015340(Cybb),ENSMUSG00000015568(Lpl),ENSMUSG00000015709(Arnt2),ENSMUSG00000015843(Rxrg),ENSMUSG00000017688(Hnf4g),ENSMUSG00000018920(Cxcl16),ENSMUSG0000001…
CC	GO:0016323	basolateral plasma membrane	45	57	102	250	1.3e-09	4.87232e-08	ENSMUSG00000000594(Gm2a),ENSMUSG00000001507(Itga3),ENSMUSG00000006567(Atp7b),ENSMUSG00000006574(Slc4a1),ENSMUSG00000010064(Slc38a3),ENSMUSG00000017309(Cd300lg),ENSMUSG00000018900(Slc22a5),ENSMUSG00000020963(Tshr),ENSMUSG00000021730(Hcn1),ENSMUSG00000022094(Slc39a14),ENSMUSG00000022180(Slc7a8),ENSMUSG00000022579(Gpihbp1),ENSMUSG00000022797(Tfrc),ENSMUSG00000022822(Abcc5),ENSMUSG00000023942(Slc29a1…	ENSMUSG00000000881(Dlg3),ENSMUSG00000003872(Lin7b),ENSMUSG00000005360(Slc1a3),ENSMUSG00000009376(Met),ENSMUSG00000016493(Cd46),ENSMUSG00000018569(Cldn7),ENSMUSG00000019906(Lin7a),ENSMUSG00000020758(Itgb4),ENSMUSG00000020805(Slc13a5),ENSMUSG00000021057(Akap5),ENSMUSG00000021567(Nkd2),ENSMUSG00000021636(Marveld2),ENSMUSG00000021640(Naip1),ENSMUSG00000022865(Cxadr),ENSMUSG00000023259(Slc26a6),ENSMUS…
MF	GO:0005148	prolactin receptor binding	21	0	21	26	1.4e-09	5.21125e-08	ENSMUSG00000005891(Prl4a1),ENSMUSG00000006488(Prl7a1),ENSMUSG00000006490(Prl8a9),ENSMUSG00000017064(Prl5a1),ENSMUSG00000017922(Prl3c1),ENSMUSG00000018259(Prl8a2),ENSMUSG00000019756(Prl8a1),ENSMUSG00000021345(Prl8a6),ENSMUSG00000021347(Prl7b1),ENSMUSG00000021348(Prl7d1),ENSMUSG00000022886(Prl2a1),ENSMUSG00000026675(Hsd17b7),ENSMUSG00000038883(Prl3a1),ENSMUSG00000038891(Prl3b1),ENSMUSG00000046899(P…	-
BP	GO:0043408	regulation of MAPK cascade	116	122	238	714	1.4e-09	5.21125e-08	ENSMUSG00000001517(Foxm1),ENSMUSG00000002603(Tgfb1),ENSMUSG00000002944(Cd36),ENSMUSG00000003032(Klf4),ENSMUSG00000004207(Psap),ENSMUSG00000004371(Il11),ENSMUSG00000005161(Prdx2),ENSMUSG00000005672(Kit),ENSMUSG00000015312(Gadd45b),ENSMUSG00000017446(C1qtnf1),ENSMUSG00000018334(Ksr1),ENSMUSG00000018648(Dusp14),ENSMUSG00000018821(Avpi1),ENSMUSG00000018932(Map2k3),ENSMUSG00000019579(Mydgf),ENSMUSG000…	ENSMUSG00000000120(Ngfr),ENSMUSG00000001672(Marveld3),ENSMUSG00000002384(Bmp8b),ENSMUSG00000002985(Apoe),ENSMUSG00000004085(Map3k20),ENSMUSG00000004558(Ndrg2),ENSMUSG00000005087(Cd44),ENSMUSG00000005320(Fgfr4),ENSMUSG00000005533(Igf1r),ENSMUSG00000008999(Bmp7),ENSMUSG00000015950(Ncf1),ENSMUSG00000017386(Traf4),ENSMUSG00000018849(Wwc1),ENSMUSG00000018924(Alox15),ENSMUSG00000018927(Ccl6),ENSMUSG000…
CC	GO:0099146	intrinsic component of postsynaptic density membrane	8	33	41	72	1.4e-09	5.21125e-08	ENSMUSG00000020598(Nrcam),ENSMUSG00000022494(Shisa9),ENSMUSG00000024873(Cnih2),ENSMUSG00000025161(Slc16a3),ENSMUSG00000039579(Grin3a),ENSMUSG00000053930(Shisa6),ENSMUSG00000059003(Grin2a),ENSMUSG00000062209(Erbb4)	ENSMUSG00000003378(Grik5),ENSMUSG00000003934(Efnb3),ENSMUSG00000013236(Ptprs),ENSMUSG00000020102(Slc16a7),ENSMUSG00000020431(Adcy1),ENSMUSG00000020524(Gria1),ENSMUSG00000021719(Rgs7bp),ENSMUSG00000025892(Gria4),ENSMUSG00000028289(Epha7),ENSMUSG00000030223(Ptpro),ENSMUSG00000030302(Atp2b2),ENSMUSG00000032452(Clstn2),ENSMUSG00000032773(Chrm1),ENSMUSG00000033295(Ptprf),ENSMUSG00000036957(Lrfn3),ENSM…
BP	GO:0030509	BMP signaling pathway	31	39	70	153	1.5e-09	5.5708e-08	ENSMUSG00000001507(Itga3),ENSMUSG00000002603(Tgfb1),ENSMUSG00000006205(Htra1),ENSMUSG00000006958(Chrd),ENSMUSG00000016918(Sulf1),ENSMUSG00000018822(Sfrp5),ENSMUSG00000020325(Fstl3),ENSMUSG00000021319(Sfrp4),ENSMUSG00000021765(Fst),ENSMUSG00000022816(Fstl1),ENSMUSG00000022997(Wnt1),ENSMUSG00000024406(Pou5f1),ENSMUSG00000024868(Dkk1),ENSMUSG00000025880(Smad7),ENSMUSG00000027204(Fbn1),ENSMUSG0000002…	ENSMUSG00000001494(Sost),ENSMUSG00000002384(Bmp8b),ENSMUSG00000005836(Gata6),ENSMUSG00000008999(Bmp7),ENSMUSG00000018238(Gdf9),ENSMUSG00000021464(Ror2),ENSMUSG00000021469(Msx2),ENSMUSG00000021835(Bmp4),ENSMUSG00000021943(Gdf10),ENSMUSG00000024975(Pdcd4),ENSMUSG00000024985(Tcf7l2),ENSMUSG00000027070(Lrp2),ENSMUSG00000027996(Sfrp2),ENSMUSG00000029050(Ski),ENSMUSG00000029335(Bmp3),ENSMUSG00000029755…
BP	GO:0051346	negative regulation of hydrolase activity	92	75	167	467	1.6e-09	5.92871e-08	ENSMUSG00000000983(Wfdc18),ENSMUSG00000001131(Timp1),ENSMUSG00000003032(Klf4),ENSMUSG00000005054(Cstb),ENSMUSG00000006529(Itih1),ENSMUSG00000007659(Bcl2l1),ENSMUSG00000014077(Chp1),ENSMUSG00000017002(Slpi),ENSMUSG00000017716(Birc5),ENSMUSG00000019278(Dpep1),ENSMUSG00000020044(Timp3),ENSMUSG00000020184(Mdm2),ENSMUSG00000020580(Rock2),ENSMUSG00000020717(Pecam1),ENSMUSG00000021403(Serpinb9b),ENSMUSG…	ENSMUSG00000000126(Wnt9a),ENSMUSG00000000753(Serpinf1),ENSMUSG00000000881(Dlg3),ENSMUSG00000001249(Hpn),ENSMUSG00000002289(Angptl4),ENSMUSG00000003452(Bicd1),ENSMUSG00000004231(Pax2),ENSMUSG00000005087(Cd44),ENSMUSG00000005824(Tnfsf14),ENSMUSG00000006522(Itih3),ENSMUSG00000015222(Map2),ENSMUSG00000017344(Vtn),ENSMUSG00000017723(Wfdc2),ENSMUSG00000017733(Eppin),ENSMUSG00000018211(Wfdc15b),ENSMUSG0…
BP	GO:0035725	sodium ion transmembrane transport	29	34	63	133	1.7e-09	6.285e-08	ENSMUSG00000000216(Scnn1g),ENSMUSG00000009687(Fxyd5),ENSMUSG00000014077(Chp1),ENSMUSG00000021591(Glrx),ENSMUSG00000021730(Hcn1),ENSMUSG00000023033(Scn8a),ENSMUSG00000024485(Slc4a9),ENSMUSG00000025496(Drd4),ENSMUSG00000026062(Slc9a2),ENSMUSG00000027397(Slc20a1),ENSMUSG00000027488(Snta1),ENSMUSG00000028854(Slc9a1),ENSMUSG00000032338(Hcn4),ENSMUSG00000032412(Atp1b3),ENSMUSG00000032511(Scn5a),ENSMUSG…	ENSMUSG00000004988(Fxyd4),ENSMUSG00000007107(Atp1a4),ENSMUSG00000009246(Trpm5),ENSMUSG00000020866(Cacna1g),ENSMUSG00000021553(Slc28a3),ENSMUSG00000021870(Slmap),ENSMUSG00000022523(Fgf12),ENSMUSG00000024354(Slc23a1),ENSMUSG00000026463(Atp2b4),ENSMUSG00000029359(Tesc),ENSMUSG00000029361(Nos1),ENSMUSG00000030340(Scnn1a),ENSMUSG00000030376(Slc8a2),ENSMUSG00000030873(Scnn1b),ENSMUSG00000033007(Asic4),…
BP	GO:0050806	positive regulation of synaptic transmission	33	52	85	199	1.9e-09	6.99277e-08	ENSMUSG00000003657(Calb2),ENSMUSG00000004113(Cacna1b),ENSMUSG00000007659(Bcl2l1),ENSMUSG00000012705(Retn),ENSMUSG00000021259(Cyp46a1),ENSMUSG00000022602(Arc),ENSMUSG00000022790(Igsf11),ENSMUSG00000025496(Drd4),ENSMUSG00000025889(Snca),ENSMUSG00000026385(Dbi),ENSMUSG00000026473(Glul),ENSMUSG00000027273(Snap25),ENSMUSG00000028072(Ntrk1),ENSMUSG00000028747(Htr6),ENSMUSG00000029236(Nmu),ENSMUSG000000…	ENSMUSG00000000120(Ngfr),ENSMUSG00000002104(Rapsn),ENSMUSG00000002985(Apoe),ENSMUSG00000003352(Cacnb3),ENSMUSG00000003411(Rab3b),ENSMUSG00000005360(Slc1a3),ENSMUSG00000006930(Hap1),ENSMUSG00000015968(Cacna1d),ENSMUSG00000017412(Cacnb4),ENSMUSG00000020431(Adcy1),ENSMUSG00000020524(Gria1),ENSMUSG00000020932(Gfap),ENSMUSG00000021464(Ror2),ENSMUSG00000021750(Fam107a),ENSMUSG00000024256(Adcyap1),ENSMU…
BP	GO:0001775	cell activation	148	150	298	933	1.9e-09	6.99277e-08	ENSMUSG00000000706(Btn1a1),ENSMUSG00000000791(Il12rb1),ENSMUSG00000001131(Timp1),ENSMUSG00000002603(Tgfb1),ENSMUSG00000003500(Impdh1),ENSMUSG00000004207(Psap),ENSMUSG00000004709(Cd244a),ENSMUSG00000005125(Ndrg1),ENSMUSG00000005148(Klf5),ENSMUSG00000005161(Prdx2),ENSMUSG00000005413(Hmox1),ENSMUSG00000005672(Kit),ENSMUSG00000006310(Zbtb32),ENSMUSG00000006574(Slc4a1),ENSMUSG00000007817(Zmiz1),ENSMUS…	ENSMUSG00000000320(Alox12),ENSMUSG00000000731(Aire),ENSMUSG00000000732(Icosl),ENSMUSG00000000782(Tcf7),ENSMUSG00000000861(Bcl11a),ENSMUSG00000000869(Il4),ENSMUSG00000000957(Mmp14),ENSMUSG00000002985(Apoe),ENSMUSG00000003379(Cd79a),ENSMUSG00000003882(Il7r),ENSMUSG00000003934(Efnb3),ENSMUSG00000004707(Ly9),ENSMUSG00000005087(Cd44),ENSMUSG00000005824(Tnfsf14),ENSMUSG00000006538(Ihh),ENSMUSG000000150…
BP	GO:0007420	brain development	103	141	244	738	2e-09	7.31141e-08	ENSMUSG00000000001(Gnai3),ENSMUSG00000001751(Naglu),ENSMUSG00000004207(Psap),ENSMUSG00000005045(Chd5),ENSMUSG00000006958(Chrd),ENSMUSG00000007946(Phox2a),ENSMUSG00000008475(Arpc5),ENSMUSG00000010064(Slc38a3),ENSMUSG00000013415(Igf2bp1),ENSMUSG00000014030(Pax5),ENSMUSG00000015134(Aldh1a3),ENSMUSG00000017491(Rarb),ENSMUSG00000019874(Fabp7),ENSMUSG00000019979(Apaf1),ENSMUSG00000020170(Frs2),ENSMUSG0…	ENSMUSG00000000303(Cdh1),ENSMUSG00000000416(Cttnbp2),ENSMUSG00000001270(Ckb),ENSMUSG00000001911(Nfix),ENSMUSG00000005089(Slc1a2),ENSMUSG00000005958(Ephb3),ENSMUSG00000006930(Hap1),ENSMUSG00000007989(Fzd3),ENSMUSG00000008575(Nfib),ENSMUSG00000008999(Bmp7),ENSMUSG00000010797(Wnt2),ENSMUSG00000013236(Ptprs),ENSMUSG00000014602(Kif1a),ENSMUSG00000014704(Hoxa2),ENSMUSG00000015709(Arnt2),ENSMUSG00000018…
BP	GO:0050863	regulation of T cell activation	63	55	118	304	2e-09	7.31141e-08	ENSMUSG00000000706(Btn1a1),ENSMUSG00000000791(Il12rb1),ENSMUSG00000002603(Tgfb1),ENSMUSG00000004709(Cd244a),ENSMUSG00000005161(Prdx2),ENSMUSG00000006574(Slc4a1),ENSMUSG00000007817(Zmiz1),ENSMUSG00000015619(Gata3),ENSMUSG00000015812(Gnrh1),ENSMUSG00000016498(Pdcd1lg2),ENSMUSG00000017697(Ada),ENSMUSG00000020399(Havcr2),ENSMUSG00000020484(Xbp1),ENSMUSG00000021318(Gli3),ENSMUSG00000021486(Prelid1),EN…	ENSMUSG00000000732(Icosl),ENSMUSG00000000782(Tcf7),ENSMUSG00000000869(Il4),ENSMUSG00000003882(Il7r),ENSMUSG00000003934(Efnb3),ENSMUSG00000005824(Tnfsf14),ENSMUSG00000006538(Ihh),ENSMUSG00000015396(Cd83),ENSMUSG00000016493(Cd46),ENSMUSG00000019982(Myb),ENSMUSG00000020919(Stat5b),ENSMUSG00000021835(Bmp4),ENSMUSG00000023274(Cd4),ENSMUSG00000024334(H2-Oa),ENSMUSG00000024340(Btnl2),ENSMUSG00000024397(…
BP	GO:0007162	negative regulation of cell adhesion	54	55	109	275	2e-09	7.31141e-08	ENSMUSG00000000706(Btn1a1),ENSMUSG00000002603(Tgfb1),ENSMUSG00000003032(Klf4),ENSMUSG00000005161(Prdx2),ENSMUSG00000010435(Spaca7),ENSMUSG00000013418(B4galnt2),ENSMUSG00000015812(Gnrh1),ENSMUSG00000016498(Pdcd1lg2),ENSMUSG00000017446(C1qtnf1),ENSMUSG00000020399(Havcr2),ENSMUSG00000021318(Gli3),ENSMUSG00000021782(Dlg5),ENSMUSG00000022018(Rgcc),ENSMUSG00000022637(Cblb),ENSMUSG00000022997(Wnt1),ENSM…	ENSMUSG00000000303(Cdh1),ENSMUSG00000000320(Alox12),ENSMUSG00000000869(Il4),ENSMUSG00000000957(Mmp14),ENSMUSG00000006538(Ihh),ENSMUSG00000018569(Cldn7),ENSMUSG00000021750(Fam107a),ENSMUSG00000021835(Bmp4),ENSMUSG00000022425(Enpp2),ENSMUSG00000022548(Apod),ENSMUSG00000022780(Meltf),ENSMUSG00000024610(Cd74),ENSMUSG00000024696(Lpxn),ENSMUSG00000026383(Epb41l5),ENSMUSG00000026697(Myoc),ENSMUSG0000002…
MF	GO:0005178	integrin binding	36	25	61	127	2.1e-09	7.64278e-08	ENSMUSG00000000555(Itga5),ENSMUSG00000001029(Icam2),ENSMUSG00000001507(Itga3),ENSMUSG00000003814(Calr),ENSMUSG00000015533(Itga2),ENSMUSG00000015647(Lama5),ENSMUSG00000019997(Ccn2),ENSMUSG00000020689(Itgb3),ENSMUSG00000020712(Tcam1),ENSMUSG00000021702(Thbs4),ENSMUSG00000025130(P4hb),ENSMUSG00000025473(Adam8),ENSMUSG00000025510(Cd151),ENSMUSG00000025511(Tspan4),ENSMUSG00000027204(Fbn1),ENSMUSG00000…	ENSMUSG00000000157(Itgb2l),ENSMUSG00000000392(Fap),ENSMUSG00000000402(Egfl6),ENSMUSG00000000957(Mmp14),ENSMUSG00000017344(Vtn),ENSMUSG00000020758(Itgb4),ENSMUSG00000020932(Gfap),ENSMUSG00000022505(Emp2),ENSMUSG00000022865(Cxadr),ENSMUSG00000025089(Gfra1),ENSMUSG00000025321(Itgb8),ENSMUSG00000026639(Lamb3),ENSMUSG00000026971(Itgb6),ENSMUSG00000027238(Frmd5),ENSMUSG00000034028(Cd226),ENSMUSG0000003…
BP	GO:1904064	positive regulation of cation transmembrane transport	27	46	73	163	2.1e-09	7.64278e-08	ENSMUSG00000014077(Chp1),ENSMUSG00000017400(Stac2),ENSMUSG00000020793(Galr2),ENSMUSG00000021313(Ryr2),ENSMUSG00000021591(Glrx),ENSMUSG00000021730(Hcn1),ENSMUSG00000022602(Arc),ENSMUSG00000024065(Ehd3),ENSMUSG00000025496(Drd4),ENSMUSG00000025551(Fgf14),ENSMUSG00000025701(Alox5),ENSMUSG00000025889(Snca),ENSMUSG00000026385(Dbi),ENSMUSG00000028854(Slc9a1),ENSMUSG00000030987(Stim1),ENSMUSG00000031400(…	ENSMUSG00000003352(Cacnb3),ENSMUSG00000004035(Gstm7),ENSMUSG00000006930(Hap1),ENSMUSG00000007122(Casq1),ENSMUSG00000015968(Cacna1d),ENSMUSG00000017412(Cacnb4),ENSMUSG00000017817(Jph2),ENSMUSG00000019787(Trdn),ENSMUSG00000020155(Kcnmb1),ENSMUSG00000021835(Bmp4),ENSMUSG00000024907(Gal),ENSMUSG00000025068(Gsto1),ENSMUSG00000025221(Kcnip2),ENSMUSG00000026527(Rgs7),ENSMUSG00000026961(Lrrc26),ENSMUSG00…
BP	GO:0006082	organic acid metabolic process	182	137	319	1011	2.2e-09	7.97122e-08	ENSMUSG00000000628(Hk2),ENSMUSG00000001773(Folh1),ENSMUSG00000002250(Ppard),ENSMUSG00000002603(Tgfb1),ENSMUSG00000002944(Cd36),ENSMUSG00000003271(Sult2b1),ENSMUSG00000003665(Has1),ENSMUSG00000004885(Crabp2),ENSMUSG00000005667(Mthfd2),ENSMUSG00000005672(Kit),ENSMUSG00000006345(Ggt1),ENSMUSG00000006457(Actn3),ENSMUSG00000006529(Itih1),ENSMUSG00000006574(Slc4a1),ENSMUSG00000006800(Sulf2),ENSMUSG0000…	ENSMUSG00000000320(Alox12),ENSMUSG00000003484(Cyp4f18),ENSMUSG00000003559(As3mt),ENSMUSG00000004035(Gstm7),ENSMUSG00000005087(Cd44),ENSMUSG00000005320(Fgfr4),ENSMUSG00000005360(Slc1a3),ENSMUSG00000006522(Itih3),ENSMUSG00000006675(P4htm),ENSMUSG00000007039(Ddah2),ENSMUSG00000007908(Hmgcll1),ENSMUSG00000009350(Mpo),ENSMUSG00000015224(Cyp2j9),ENSMUSG00000015568(Lpl),ENSMUSG00000015890(Amdhd1),ENSMUS…
BP	GO:0042476	odontogenesis	31	29	60	125	2.2e-09	7.97122e-08	ENSMUSG00000001510(Dlx3),ENSMUSG00000002603(Tgfb1),ENSMUSG00000006205(Htra1),ENSMUSG00000006948(Klk4),ENSMUSG00000015647(Lama5),ENSMUSG00000019851(Perp),ENSMUSG00000021318(Gli3),ENSMUSG00000021765(Fst),ENSMUSG00000022894(Adamts5),ENSMUSG00000025854(Fam20c),ENSMUSG00000026167(Wnt10a),ENSMUSG00000026335(Pam),ENSMUSG00000027253(Lrp4),ENSMUSG00000027358(Bmp2),ENSMUSG00000028435(Aqp3),ENSMUSG000000287…	ENSMUSG00000000120(Ngfr),ENSMUSG00000000142(Axin2),ENSMUSG00000008999(Bmp7),ENSMUSG00000021367(Edn1),ENSMUSG00000021388(Aspn),ENSMUSG00000021469(Msx2),ENSMUSG00000021835(Bmp4),ENSMUSG00000022330(Osr2),ENSMUSG00000022510(Trp63),ENSMUSG00000022540(Rogdi),ENSMUSG00000024985(Tcf7l2),ENSMUSG00000027381(Bcl2l11),ENSMUSG00000028364(Tnc),ENSMUSG00000028859(Csf3r),ENSMUSG00000031616(Ednra),ENSMUSG00000031…
[truncated: 15,890 more rows]
